# Supplementary material for: Monitoring the role of site chemistry on the formation energy of perovskites via deep learning analysis of Hirshfeld surfaces
Source: Royal Society of Chemistry journal article supplement (doi:10.1039/d1tc01972d), 2021-01-01
Supplement: d1tc01972d1.csv [file d1tc01972d1.csv]

	chemical_formula	ID	initial_A_atom	initial_B_atom	Formation_Energy	OQMD_structure_prototype	CNN_prediction	Split	Predicted_CGCNN	CNN_adjusted_prediction	final_structure_A_atom	final_structure_B_atom	a	b	c	alpha	beta	gamma	lattice_type	classified_structure	stability_rank_among_same_chemistry_polymorphs	CNN_predicted_stability_rank_among_same_chemistry_polymorphs
0	AcAgO3	681608	Ac	Ag	-1.9570698659999999	OrthoPerovskite_GdFeO3	-1.9663408	train	-1.980115532875061	-1.9295864467614816	Ac	Ag	5.77939	6.077382	8.248225999999999	90.0	90.0	90.0	orthorhombic	orthorhombic	0	1
1	AcAgO3	681609	Ag	Ac	-1.6742013690000002	OrthoPerovskite_GdFeO3	-1.8435313999999998	train	-1.7751158475875854	-1.7999927163956726			6.008001	6.2245040000000005	8.526278999999999	90.0	90.0	90.0	orthorhombic	other	4	4
2	AcAlO3	681395	Al	Ac	-3.3042231810000002	OrthoPerovskite_GdFeO3	-3.2493606	train	-3.3090314865112305	-3.2834838032764897			5.553216	5.619502	9.501073	90.0	90.0	90.0	orthorhombic	other	3	3
3	AcAsO3	681430	Ac	As	-2.398331195	OrthoPerovskite_GdFeO3	-2.4575133	train	-2.4232492446899414	-2.4478926719209593	Ac	As	5.779735	6.012188	8.262397	90.0	90.0	90.0	orthorhombic	orthorhombic	1	2
4	AcAsO3	681431	As	Ac	-2.622379071	OrthoPerovskite_GdFeO3	-2.6202332999999998	train	-2.3370306491851807	-2.619601774034677			5.879193	6.526741	8.652577	90.0	90.0	90.0	orthorhombic	other	0	0
5	AcAuO3	681507	Ac	Au	-2.005544344	OrthoPerovskite_GdFeO3	-2.0383259999999996	train	-1.9680960178375244	-2.005548307979994	Ac	Au	5.8986730000000005	6.749967999999999	7.630299000000001	90.0	90.0	90.0	orthorhombic	orthorhombic	0	0
6	AcAuO3	681508	Au	Ac	-1.695059226	OrthoPerovskite_GdFeO3	-1.7839509999999998	train	-1.6877446174621582	-1.7371209305821513			6.075238	6.366855999999999	8.494691	90.0	90.0	90.0	orthorhombic	other	4	3
7	AcBeO3	682060	Be	Ac	-2.734156335	OrthoPerovskite_GdFeO3	-2.692582	test	-2.5427112579345703	-2.6959472159969113			5.498944	5.911919	8.856685	90.0	90.0	90.0	orthorhombic	other	1	2
8	AcBiO3	693552	Ac	Bi	-2.5003153769999997	OrthoPerovskite_GdFeO3	-2.5407495	test	-2.275493860244751	-2.5357270694465113	Ac	Bi	6.09025	6.414658	8.796072	90.0	90.0	90.0	orthorhombic	orthorhombic	0	0
9	AcCdO3	681954	Ac	Cd	-2.223747964	OrthoPerovskite_GdFeO3	-2.4379977999999998	test	-2.27340030670166	-2.427299081813411	Ac	Cd	5.8403540000000005	6.198963	8.338094	90.0	90.0	90.0	orthorhombic	orthorhombic	0	0
10	AcCdO3	681955	Cd	Ac	-2.105641426	OrthoPerovskite_GdFeO3	-2.173926	test	-2.1028523445129395	-2.148639226408093			6.085392	6.169014	8.756076	90.0	90.0	90.0	orthorhombic	other	2	3
11	AcCoO3	681582	Co	Ac	-2.230268349	OrthoPerovskite_GdFeO3	-2.216297	train	-2.3617451190948486	-2.1933509174458288			5.750367	5.900919999999999	8.479583	90.0	90.0	90.0	orthorhombic	other	4	4
12	AcCrO3	681527	Cr	Ac	-2.7490327530000003	OrthoPerovskite_GdFeO3	-2.7421765	train	-2.8618559837341313	-2.7482814531206747			5.847586	5.928833999999999	8.735333	90.0	90.0	90.0	orthorhombic	other	5	5
13	AcCrO3	681528	Ac	Cr	-3.1378952	OrthoPerovskite_GdFeO3	-3.1327274	train	-2.9255857467651367	-3.160407463252831	Ac	Cr	5.594069999999999	5.638902	7.925274000000001	90.0	90.0	90.0	orthorhombic	orthorhombic	0	0
14	AcCuO3	682068	Ac	Cu	-2.2409772119999998	OrthoPerovskite_GdFeO3	-2.2515984	test	-2.3129892349243164	-2.2306024642584963	Ac	Cu	3.90229974	3.90229953	3.9046705000000004	90.0	90.0	90.19595267	cubic	cubic	0	0
15	AcCuO3	682069	Cu	Ac	-1.926233382	OrthoPerovskite_GdFeO3	-1.9202158	test	-2.225793838500977	-1.8809133743979416			5.832079	5.885701	8.501113	90.0	90.0	90.0	orthorhombic	other	5	5
16	AcDyO3	693092	Ac	Dy	-3.7124336319999998	OrthoPerovskite_GdFeO3	-3.548239	train	-3.662245512008667	-3.598873071376199	Ac	Dy	5.98884	6.175955	8.594934	90.0	90.0	90.0	orthorhombic	orthorhombic	0	0
17	AcErO3	681800	Ac	Er	-3.7477513339999997	OrthoPerovskite_GdFeO3	-3.4034312000000004	train	-3.740372896194458	-3.4460656886508865	Ac	Er	5.959843	6.122967	8.521027	90.0	90.0	90.0	orthorhombic	orthorhombic	0	4
18	AcErO3	681801	Er	Ac	-3.53915224	OrthoPerovskite_GdFeO3	-3.5535226000000004	train	-3.4444396495819087	-3.6044485520296408			6.095314	6.240371	8.963915	90.0	90.0	90.0	orthorhombic	other	3	1
19	AcEuO3	693567	Ac	Eu	-3.0400545869999998	OrthoPerovskite_GdFeO3	-3.0113027000000003	test	-3.1445040702819824	-3.032274927538552	Ac	Eu	6.033454	6.300369	8.783866999999999	90.0	90.0	90.0	orthorhombic	orthorhombic	0	0
20	AcFeO3	681998	Ac	Fe	-2.7308921319999997	OrthoPerovskite_GdFeO3	-2.7993007000000003	test	-2.6867713928222656	-2.808561351663967	Ac	Fe	5.62988	5.655006	7.970083	90.0	90.0	90.0	tetragonal	tetragonal	0	1
21	AcFeO3	681999	Fe	Ac	-2.545783038	OrthoPerovskite_GdFeO3	-2.5279121	test	-2.5314571857452397	-2.5221804960229948			5.802117	5.818965	9.071719	90.0	90.0	90.0	tetragonal	other	4	5
22	AcGaO3	682906	Ac	Ga	-2.9136714969999997	OrthoPerovskite_GdFeO3	-3.00783	train	-2.8853847980499268	-3.028610386001492	Ac	Ga	5.583908	5.59297151	5.59297151	60.3465329	60.05359185	60.05359185	rhombohedral	rhombohedral	0	0
23	AcGaO3	682907	Ga	Ac	-2.856211835	OrthoPerovskite_GdFeO3	-2.8951037	train	-2.870348691940308	-2.9096567739218364			4.540163	6.776745	10.327652	90.0	90.0	90.0	orthorhombic	other	4	3
24	AcGdO3	693238	Ac	Gd	-3.6701463530000002	OrthoPerovskite_GdFeO3	-3.5244515	train	-3.7752413749694815	-3.5737714841925086	Ac	Gd	6.029422	6.224804	8.672885	90.0	90.0	90.0	orthorhombic	orthorhombic	0	0
25	AcGeO3	682020	Ac	Ge	-2.547366005	OrthoPerovskite_GdFeO3	-2.4017560000000002	test	-2.6206376552581787	-2.3890551847080466	Ac	Ge	5.743995	5.815935	8.153978	90.0	90.0	90.0	orthorhombic	orthorhombic	1	5
26	AcGeO3	682021	Ge	Ac	-2.549898368	OrthoPerovskite_GdFeO3	-2.550464	test	-2.5747103691101074	-2.5459782252508605			5.917743	6.300483	8.814555	90.0	90.0	90.0	orthorhombic	other	0	3
27	AcHfO3	682162	Ac	Hf	-3.413730616	OrthoPerovskite_GdFeO3	-3.3177001000000006	train	-3.311586141586304	-3.355598565960244	Ac	Hf	5.772867	5.940432	8.324176	90.0	90.0	90.0	orthorhombic	orthorhombic	0	1
28	AcHfO3	682163	Hf	Ac	-3.244482337	OrthoPerovskite_GdFeO3	-3.2696512	train	-3.1271800994873047	-3.304895312048298			5.924394	6.7226729999999995	7.771730000000001	90.0	90.0	89.99838800000002	orthorhombic	other	4	2
29	AcHgO3	693072	Ac	Hg	-1.950940405	OrthoPerovskite_GdFeO3	-2.0013726000000003	test	-1.9344024658203125	-1.9665535001257113	Ac	Hg	5.816985	6.6802600000000005	8.230587	90.0	90.0	90.0	orthorhombic	orthorhombic	0	0
30	AcHoO3	682276	Ac	Ho	-3.730655886	OrthoPerovskite_GdFeO3	-3.6014334999999997	train	-3.76716947555542	-3.655006182440531	Ac	Ho	5.975033	6.151795	8.551437	90.0	90.0	90.0	orthorhombic	orthorhombic	0	0
31	AcHoO3	682277	Ho	Ac	-3.534587133	OrthoPerovskite_GdFeO3	-3.5507708	train	-3.440401315689087	-3.60154473499918			6.113194999999999	6.255358	8.953296	90.0	90.0	90.0	orthorhombic	other	3	1
32	AcInO3	681485	Ac	In	-2.748344322	OrthoPerovskite_GdFeO3	-2.6804919999999997	train	-2.7163147926330566	-2.6831893310131667	Ac	In	5.856845	6.035480000000001	8.359380999999999	90.0	90.0	90.0	orthorhombic	orthorhombic	0	0
33	AcInO3	681486	In	Ac	-2.553189777	OrthoPerovskite_GdFeO3	-2.6079855	train	-2.4773833751678467	-2.6066773717432046			6.072943	6.094749	9.005362	90.0	90.0	90.0	tetragonal	other	4	3
34	AcIrO3	682106	Ac	Ir	-2.193813584	OrthoPerovskite_GdFeO3	-2.2371037	test	-2.110790967941284	-2.2153070370067276	Ac	Ir	5.615705	5.9067870000000005	8.082453	90.0	90.0	90.0	orthorhombic	orthorhombic	0	0
35	AcIrO3	682107	Ir	Ac	-1.872371961	OrthoPerovskite_GdFeO3	-1.9315107	test	-1.6803494691848757	-1.8928322358622007			5.623457	6.650010000000001	8.406661	90.0	90.0	90.0	orthorhombic	other	5	5
36	AcLuO3	682328	Ac	Lu	-3.7929528510000003	OrthoPerovskite_GdFeO3	-3.7225254	test	-3.6609792709350586	-3.78278753336386	Ac	Lu	5.905319	6.04713	8.428934	90.0	90.0	90.0	orthorhombic	orthorhombic	0	0
37	AcLuO3	682329	Lu	Ac	-3.552761888	OrthoPerovskite_GdFeO3	-3.3607662000000005	test	-3.415165901184082	-3.401043756241338			6.07271	6.194329	8.921038000000001	90.0	90.0	90.0	orthorhombic	other	4	4
38	AcMgO3	682876	Ac	Mg	-2.898242118	OrthoPerovskite_GdFeO3	-2.9796112	test	-2.8804323673248287	-2.99883270156979	Ac	Mg	5.634983	5.7335139999999996	7.961129	90.0	90.0	90.0	orthorhombic	orthorhombic	1	0
39	AcMgO3	682877	Mg	Ac	-2.7775427980000003	OrthoPerovskite_GdFeO3	-2.7946212000000004	test	-2.8953580856323238	-2.803623343162608			5.5980870000000005	6.165813	8.840327	90.0	90.0	90.0	orthorhombic	other	4	4
40	AcMnO3	682048	Ac	Mn	-2.9183426239999997	OrthoPerovskite_GdFeO3	-2.8945897	train	-2.754866361618042	-2.909114379142544	Ac	Mn	5.61209	5.655166	7.947556	90.0	90.0	90.0	orthorhombic	orthorhombic	0	0
41	AcMnO3	682049	Mn	Ac	-2.603976322	OrthoPerovskite_GdFeO3	-2.5450943	train	-2.797635078430176	-2.540311888195674			5.901888	5.9866269999999995	8.625046000000001	90.0	90.0	90.0	orthorhombic	other	4	5
42	AcMoO3	682367	Mo	Ac	-2.2978209780000003	OrthoPerovskite_GdFeO3	-2.320227	train	-2.2527034282684326	-2.3030222976245325			5.97104	6.093138	8.59251	90.0	90.0	90.0	orthorhombic	other	4	4
43	AcNbO3	682424	Ac	Nb	-2.955387027	OrthoPerovskite_GdFeO3	-2.971289	train	-2.9279301166534424	-2.9900507602619557	Ac	Nb	5.716746	5.965612	8.201474000000001	90.0	90.0	90.0	orthorhombic	orthorhombic	0	0
44	AcNbO3	682425	Nb	Ac	-2.6893659430000003	OrthoPerovskite_GdFeO3	-2.620978	train	-2.722334861755371	-2.6203876133189943			5.767998	6.458563	8.386028999999999	90.0	90.0	90.0	orthorhombic	other	5	5
45	AcNiO3	682930	Ni	Ac	-2.021152888	OrthoPerovskite_GdFeO3	-2.0885290000000003	train	-2.207679271697998	-2.058524660323991			5.870998	5.96686	8.330438000000001	90.0	90.0	90.0	orthorhombic	other	4	4
46	AcNiO3	682931	Ac	Ni	-2.365066286	OrthoPerovskite_GdFeO3	-2.355746	train	-2.390341281890869	-2.340503465262052	Ac	Ni	3.893193	3.89835219	3.89835219	89.82349105999998	90.0	90.0	cubic	cubic	0	1
47	AcOsO3	681992	Ac	Os	-2.145855086	OrthoPerovskite_GdFeO3	-2.2951183	test	-2.1448700428009038	-2.2765265237046535	Ac	Os	5.463442	6.091039	7.988596	90.0	90.0	90.0	orthorhombic	orthorhombic	0	0
48	AcOsO3	681993	Os	Ac	-1.9678647930000002	OrthoPerovskite_GdFeO3	-2.0204973	test	-1.836997389793396	-1.9867347013621552			6.1864870000000005	6.509962000000001	8.590132	90.0	90.0	90.0	orthorhombic	other	4	4
49	AcPbO3	693502	Ac	Pb	-2.3691977719999997	OrthoPerovskite_GdFeO3	-2.4015517	train	-2.209055185317993	-2.388839598611919	Ac	Pb	6.033672	6.376914	8.700672	90.0	90.0	90.0	orthorhombic	orthorhombic	0	0
50	AcPdO3	682266	Ac	Pd	-2.171383091	OrthoPerovskite_GdFeO3	-2.2041150000000003	train	-2.1198456287384038	-2.180495950128048	Ac	Pd	5.714581	5.923966	8.08106	90.0	90.0	90.0	orthorhombic	orthorhombic	0	0
51	AcPdO3	682267	Pd	Ac	-1.837594086	OrthoPerovskite_GdFeO3	-1.8681417000000002	train	-1.8293873071670528	-1.8259625573233353			5.947641	6.171973	8.599355000000001	90.0	90.0	90.0	orthorhombic	other	4	5
52	AcPtO3	681816	Ac	Pt	-2.100629402	OrthoPerovskite_GdFeO3	-2.1076200000000003	train	-2.1332576274871826	-2.0786702998793802	Ac	Pt	5.810847	6.177112999999999	7.805455	90.0	90.0	90.0	orthorhombic	orthorhombic	0	0
53	AcPtO3	681817	Pt	Ac	-1.848645579	OrthoPerovskite_GdFeO3	-1.8588481	train	-1.8020308017730715	-1.816155553197204			5.963284	6.43036	8.341776	90.0	90.0	90.0	orthorhombic	other	4	4
54	AcReO3	693134	Ac	Re	-2.2855945930000003	OrthoPerovskite_GdFeO3	-2.3596807	train	-2.319632053375244	-2.344655528954818	Ac	Re	5.556075	5.977869999999999	8.045599000000001	90.0	90.0	90.0	orthorhombic	orthorhombic	0	1
55	AcRhO3	682090	Ac	Rh	-2.333914524	OrthoPerovskite_GdFeO3	-2.3344507	train	-2.210784912109375	-2.318031754087997	Ac	Rh	5.634515	5.836501999999999	8.04602	90.0	90.0	90.0	orthorhombic	orthorhombic	0	1
56	AcRhO3	682091	Rh	Ac	-1.963752872	OrthoPerovskite_GdFeO3	-2.0127384999999998	train	-1.8299949169158936	-1.9785472838260199			5.787873	6.015764	8.855133	90.0	90.0	90.0	orthorhombic	other	4	4
57	AcRuO3	681644	Ru	Ac	-1.9737178880000001	OrthoPerovskite_GdFeO3	-2.057354	train	-2.0674965381622314	-2.0256274672414243			5.949587999999999	5.988069	8.447695	90.0	90.0	90.0	orthorhombic	other	5	4
58	AcRuO3	681645	Ac	Ru	-2.344679783	OrthoPerovskite_GdFeO3	-2.4175735	train	-2.270981550216675	-2.405746487084421	Ac	Ru	5.618619	5.835193	8.028713	90.0	90.0	90.0	orthorhombic	orthorhombic	0	0
59	AcSbO3	693311	Ac	Sb	-2.4653431169999998	OrthoPerovskite_GdFeO3	-2.5097005	train	-2.528583526611328	-2.5029628369518653	Ac	Sb	5.980087	6.327081	8.621257	90.0	90.0	90.0	orthorhombic	orthorhombic	0	0
60	AcScO3	682250	Sc	Ac	-3.506676961	OrthoPerovskite_GdFeO3	-3.3554986000000007	train	-3.395013332366944	-3.3954851594720767			5.961633999999999	6.047289	8.926582000000002	90.0	90.0	90.0	orthorhombic	other	3	3
61	AcSiO3	693442	Ac	Si	-2.707718864	OrthoPerovskite_GdFeO3	-2.660641	train	-2.9172060489654537	-2.6622417069592132	Ac	Si	3.9270959999999997	3.93496895	3.93497287	90.0586354	90.0	90.0	cubic	cubic	3	3
62	AcSmO3	693476	Ac	Sm	-3.60763089	OrthoPerovskite_GdFeO3	-3.562044	train	-3.7569887638092037	-3.61344069769552	Ac	Sm	6.079668	6.292961	8.759086	90.0	90.0	90.0	orthorhombic	orthorhombic	0	0
63	AcSnO3	693106	Ac	Sn	-2.582038423	OrthoPerovskite_GdFeO3	-2.4570953999999996	train	-2.6718292236328125	-2.4474516859710245	Ac	Sn	5.942282	6.207685	8.551260000000001	90.0	90.0	90.0	orthorhombic	orthorhombic	0	2
64	AcTaO3	681549	Ac	Ta	-2.945405398	OrthoPerovskite_GdFeO3	-2.9656932	train	-2.943225860595703	-2.984145832818446	Ac	Ta	5.615243	5.982978	8.194742999999999	90.0	90.0	90.0	orthorhombic	orthorhombic	0	3
65	AcTaO3	681550	Ta	Ac	-2.729854918	OrthoPerovskite_GdFeO3	-2.7048745	train	-2.803805351257324	-2.7089187876398126			5.6381760000000005	6.593921000000001	8.269909	90.0	90.0	90.0	orthorhombic	other	5	5
66	AcTbO3	693165	Ac	Tb	-3.561024161	OrthoPerovskite_GdFeO3	-3.462807	train	-3.6906936168670654	-3.508721571795452	Ac	Tb	6.008922	6.2009419999999995	8.63	90.0	90.0	90.0	orthorhombic	orthorhombic	0	0
67	AcTcO3	681606	Ac	Tc	-2.486538613	OrthoPerovskite_GdFeO3	-2.4859712000000003	test	-2.4105892181396484	-2.477922664896881	Ac	Tc	5.651505	5.839621	8.094891	90.0	90.0	90.0	orthorhombic	orthorhombic	0	0
68	AcTcO3	681607	Tc	Ac	-2.1666042869999997	OrthoPerovskite_GdFeO3	-2.2935047	test	-2.1965267658233643	-2.27482378398507			5.2259839999999995	6.620728	8.641846000000001	90.0	90.0	90.0	orthorhombic	other	5	5
69	AcTiO3	682118	Ac	Ti	-3.442792975	OrthoPerovskite_GdFeO3	-3.4148026	train	-3.29908299446106	-3.458065276186382	Ac	Ti	5.646776	5.6619019999999995	8.007391	90.0	90.0	90.0	tetragonal	tetragonal	0	0
70	AcTiO3	682119	Ti	Ac	-3.13992171	OrthoPerovskite_GdFeO3	-2.9552255	train	-3.1502790451049805	-2.9730998681663086			5.856605	6.024586	8.698466	90.0	90.0	90.0	orthorhombic	other	5	5
71	AcTlO3	693076	Ac	Tl	-2.270464568	OrthoPerovskite_GdFeO3	-2.213997	train	-2.2557876110076904	-2.1909238590949096	Ac	Tl	5.936799	6.295767	8.546991	90.0	90.0	90.0	orthorhombic	orthorhombic	0	2
72	AcTmO3	682134	Ac	Tm	-3.771803463	OrthoPerovskite_GdFeO3	-3.6260545	test	-3.8553080558776855	-3.6809873144657392	Ac	Tm	5.93953	6.089498000000001	8.493807	90.0	90.0	90.0	orthorhombic	orthorhombic	0	0
73	AcTmO3	682135	Tm	Ac	-3.5483995530000003	OrthoPerovskite_GdFeO3	-3.5285269999999995	test	-3.50002384185791	-3.5780721260660604			6.091076	6.222751000000001	8.942664	90.0	90.0	90.0	orthorhombic	other	3	2
74	AcVO3	682298	Ac	V	-3.221116683	OrthoPerovskite_GdFeO3	-3.147523	train	-3.041962146759033	-3.1760204130514653	Ac	V	5.664276	5.6835580000000006	7.997419	90.0	90.0	90.0	tetragonal	tetragonal	0	0
75	AcVO3	682299	V	Ac	-2.930430665	OrthoPerovskite_GdFeO3	-2.8793545	train	-2.8268635272979736	-2.893037544626056			5.843862000000001	5.9122069999999995	8.976585	90.0	90.0	90.0	orthorhombic	other	4	4
76	AcWO3	682348	Ac	W	-2.501127739	OrthoPerovskite_GdFeO3	-2.5541462999999998	train	-2.546459197998047	-2.549863945670682	Ac	W	5.66937	5.859704	8.070134	90.0	90.0	90.0	orthorhombic	orthorhombic	0	0
77	AcWO3	682349	W	Ac	-2.288922625	OrthoPerovskite_GdFeO3	-2.3268561	train	-2.441321611404419	-2.310017607413262			5.3738269999999995	6.6455210000000005	8.375005	90.0	90.0	90.0	orthorhombic	other	5	5
78	AcYO3	693097	Ac	Y	-3.692702933	OrthoPerovskite_GdFeO3	-3.5132334000000003	test	-3.41544771194458	-3.5619336653723153	Ac	Y	5.992942	6.182906	8.603232	90.0	90.0	90.0	orthorhombic	orthorhombic	0	0
79	AcYbO3	693252	Ac	Yb	-3.0939049510000003	OrthoPerovskite_GdFeO3	-2.9669485	train	-3.2018842697143555	-2.985470479056667	Ac	Yb	5.9368989999999995	6.214081	8.429072	90.0	90.0	90.0	orthorhombic	orthorhombic	0	2
80	AcZnO3	682282	Ac	Zn	-2.416015892	OrthoPerovskite_GdFeO3	-2.3892634	train	-2.2936882972717285	-2.375872458988615	Ac	Zn	5.586839999999999	5.61530767	5.61530767	60.55397869	60.16756158999999	60.16756159	triclinic	triclinic	0	3
81	AcZnO3	682283	Zn	Ac	-2.2795972890000002	OrthoPerovskite_GdFeO3	-2.2817066	train	-2.308243989944458	-2.2623739243633403			5.778622	6.010858	8.703233	90.0	90.0	90.0	orthorhombic	other	4	5
82	AcZrO3	682378	Ac	Zr	-3.36537122	OrthoPerovskite_GdFeO3	-3.3762252	train	-3.2940351963043213	-3.4173567540877974	Ac	Zr	5.840051	6.057017	8.340092	90.0	90.0	90.0	orthorhombic	orthorhombic	0	0
83	AcZrO3	682379	Zr	Ac	-3.151933079	OrthoPerovskite_GdFeO3	-3.0720412999999995	train	-3.128566026687622	-3.0963688955181743			6.076830999999999	6.411628	8.240844000000001	90.0	90.0	90.0	orthorhombic	other	4	5
84	AgAsO3	693199	Ag	As	-0.81231633	OrthoPerovskite_GdFeO3	-0.87257427	train	-0.8698946237564087	-0.7753972334604919			5.326032	5.362211	7.526598	90.0	90.0	90.0	orthorhombic	other	1	1
85	AgBiO3	681670	Bi	Ag	-0.8155145559999999	OrthoPerovskite_GdFeO3	-0.9259823	train	-0.7951991558074951	-0.8317556705116382	Bi	Ag	5.7796769999999995	6.050075	7.718789	90.0	90.0	90.0	orthorhombic	orthorhombic	2	1
86	AgBiO3	681671	Ag	Bi	-0.8155692859999999	OrthoPerovskite_GdFeO3	-0.9056812	train	-0.7958289384841919	-0.8103330816908368	Ag	Bi	5.715968	5.831148000000001	8.171362	90.0	90.0	90.0	orthorhombic	orthorhombic	1	2
87	AgGeO3	693119	Ag	Ge	-1.053436235	OrthoPerovskite_GdFeO3	-1.1306162	train	-1.1886210441589355	-1.0476941121969159			5.325381	5.3431489999999995	7.309983	90.0	90.0	90.0	tetragonal	other	0	0
88	AgHgO3	693497	Hg	Ag	-0.118459124	OrthoPerovskite_GdFeO3	-0.40418994	train	-0.03502476215362549	-0.28113805973608563	Hg	Ag	5.544178	5.706748999999999	7.993417	90.0	90.0	90.0	orthorhombic	orthorhombic	0	0
89	AgIrO3	693067	Ag	Ir	-0.5837866279999999	OrthoPerovskite_GdFeO3	-0.7525493000000001	train	-0.626165509223938	-0.6487417526964437	Ag	Ir	5.346933	5.4881400000000005	7.656737	90.0	90.0	90.0	orthorhombic	orthorhombic	1	0
90	AgMoO3	681416	Mo	Ag	-1.368138689	OrthoPerovskite_GdFeO3	-1.5901878	test	-1.4012837409973145	-1.5326537163818028			5.562817	5.640025	8.729246	90.0	90.0	90.0	orthorhombic	other	3	1
91	AgMoO3	681417	Ag	Mo	-1.545327104	OrthoPerovskite_GdFeO3	-1.6791756000000002	test	-1.4464218616485596	-1.626557448173071	Ag	Mo	5.4378	5.516883	7.761417	90.0	90.0	90.0	orthorhombic	orthorhombic	1	0
92	AgOsO3	682254	Os	Ag	-0.608765254	OrthoPerovskite_GdFeO3	-0.72813517	test	-0.8676044940948486	-0.6229789187412594			5.267894999999999	5.684603	8.901757	90.0	90.0	90.0	orthorhombic	other	4	4
93	AgOsO3	682255	Ag	Os	-0.79723029	OrthoPerovskite_GdFeO3	-0.9339048000000001	test	-0.7136757373809814	-0.8401158312877932	Ag	Os	5.412962	5.425423	7.653992999999999	90.0	90.0	90.0	tetragonal	tetragonal	1	0
94	AgPbO3	693178	Pb	Ag	-0.677377885	OrthoPerovskite_GdFeO3	-0.8213549000000001	train	-0.6789562702178955	-0.7213483640312253			5.519532	5.787083999999999	8.322965	90.0	90.0	90.0	orthorhombic	other	0	1
95	AgPbO3	693439	Ag	Pb	-0.668167485	OrthoPerovskite_GdFeO3	-0.8120702	train	-0.5846511125564575	-0.7115507515656693			5.484424	5.809101999999999	8.382377	90.0	90.0	90.0	orthorhombic	other	1	2
96	AgPdO3	693423	Ag	Pd	-0.323224952	OrthoPerovskite_GdFeO3	-0.57020116	test	-0.2942823171615601	-0.4563201979305479			5.299914	5.526154	7.718955	90.0	90.0	90.0	orthorhombic	other	0	1
97	AgPtO3	693412	Ag	Pt	-0.388757876	OrthoPerovskite_GdFeO3	-0.5605741	train	-0.5118274688720703	-0.446161312553244	Ag	Pt	5.3898410000000005	5.527178	7.702033999999999	90.0	90.0	90.0	orthorhombic	orthorhombic	0	1
98	AgRhO3	693219	Ag	Rh	-0.5409470239999999	OrthoPerovskite_GdFeO3	-0.69839686	test	-0.6029101610183716	-0.591597782381381	Ag	Rh	5.357196	5.4114260000000005	7.617286	90.0	90.0	90.0	orthorhombic	orthorhombic	0	1
99	AgRuO3	681368	Ru	Ag	-0.656171564	OrthoPerovskite_GdFeO3	-0.8223728000000001	train	-0.8617603778839111	-0.7224224956379212			5.269553	5.492718	8.870434	90.0	90.0	90.0	orthorhombic	other	4	1
100	AgRuO3	681369	Ag	Ru	-0.7513125490000001	OrthoPerovskite_GdFeO3	-0.85289705	train	-0.8445969820022583	-0.7546329894935913	Ag	Ru	5.380118	5.3910540000000005	7.629639999999999	90.0	90.0	90.0	tetragonal	tetragonal	1	0
101	AgSbO3	682168	Sb	Ag	-0.935034314	OrthoPerovskite_GdFeO3	-1.0526106000000002	test	-1.099598407745361	-0.9653792674584581			5.427441	5.694819	8.697928	90.0	90.0	90.0	orthorhombic	other	4	3
102	AgSbO3	682169	Ag	Sb	-1.156607662	OrthoPerovskite_GdFeO3	-1.1143601	test	-1.0096056461334229	-1.0305399803454482			5.5391330000000005	5.59088	7.847681	90.0	90.0	90.0	orthorhombic	other	0	1
103	AgSnO3	693174	Ag	Sn	-1.126063425	OrthoPerovskite_GdFeO3	-1.1625311000000003	train	-1.0878891944885254	-1.0813720793985453			5.391757	5.661439	8.029798	90.0	90.0	90.0	orthorhombic	other	0	1
104	AgTeO3	682236	Te	Ag	-0.8278386459999999	OrthoPerovskite_GdFeO3	-0.85661006	test	-0.9471075534820556	-0.7585511164186112			5.649687	6.098507	7.827329	90.0	90.0	90.0	orthorhombic	other	2	0
105	AgTeO3	682237	Ag	Te	-0.835206315	OrthoPerovskite_GdFeO3	-0.78791136	test	-0.8773092031478882	-0.6860573105350094	Ag	Te	5.619536	5.71905	8.010077	90.0	90.0	90.0	orthorhombic	orthorhombic	0	4
106	AgWO3	681920	W	Ag	-1.413656766	OrthoPerovskite_GdFeO3	-1.4967726000000001	train	-1.1510376930236816	-1.4340780027892919			5.2518139999999995	6.199215000000001	8.389249000000001	90.0	90.0	90.0	orthorhombic	other	4	4
107	AgWO3	681921	Ag	W	-1.668573174	OrthoPerovskite_GdFeO3	-1.7678863	train	-1.6052535772323608	-1.7201687721951908	Ag	W	5.454119	5.544345	7.784530999999999	90.0	90.0	90.0	orthorhombic	orthorhombic	3	0
108	AlAgO3	682787	Al	Ag	-1.542512265	OrthoPerovskite_GdFeO3	-1.6076875	test	-1.6646863222122192	-1.5511201481311845			4.912533	5.22184	8.58757	90.0	90.0	90.0	orthorhombic	other	0	0
109	AlAgO3	682788	Ag	Al	-1.509967708	OrthoPerovskite_GdFeO3	-1.4466983999999998	test	-1.4356801509857178	-1.3812375657129472	Ag	Al	5.093845	5.323111	7.300472999999999	90.0	90.0	90.0	orthorhombic	orthorhombic	1	2
110	AlBiO3	682046	Al	Bi	-2.131580891	OrthoPerovskite_GdFeO3	-2.1182797000000004	test	-2.160339593887329	-2.0899188711416814			5.494176	5.499281	8.656595	90.0	90.0	90.0	tetragonal	other	4	4
111	AlBiO3	682047	Bi	Al	-2.319369753	OrthoPerovskite_GdFeO3	-2.2128417000000002	test	-1.9925886392593384	-2.1897047371328155	Bi	Al	5.334808	5.391496	7.568650999999999	90.0	90.0	90.0	orthorhombic	orthorhombic	0	1
112	AlCdO3	682044	Al	Cd	-1.9298837709999999	OrthoPerovskite_GdFeO3	-1.8886703	test	-2.090717315673828	-1.8476252138723253			5.236233	5.506268	8.124367	90.0	90.0	90.0	orthorhombic	other	2	0
113	AlCdO3	682045	Cd	Al	-1.966830123	OrthoPerovskite_GdFeO3	-1.8817959999999998	test	-1.9568538665771484	-1.8403711585585325	Cd	Al	5.178954	5.340917	7.3657520000000005	90.0	90.0	90.0	orthorhombic	orthorhombic	0	1
114	AlHgO3	682649	Al	Hg	-1.559960178	OrthoPerovskite_GdFeO3	-1.6021355	train	-1.720888376235962	-1.5452614403206182			5.19043	5.431874	8.588467999999999	90.0	90.0	90.0	orthorhombic	other	2	2
115	AlHgO3	682650	Hg	Al	-1.616114786	OrthoPerovskite_GdFeO3	-1.6286323999999999	train	-1.68181049823761	-1.573222102241691			3.627818	5.375619	5.3833720000000005	90.0	90.0	90.0	tetragonal	other	0	1
116	AlInO3	682486	Al	In	-2.353853519	OrthoPerovskite_GdFeO3	-2.4163682	train	-2.311610698699951	-2.4044746029842634			5.219848000000001	5.225635	8.140516	90.0	90.0	90.0	tetragonal	other	2	1
117	AlInO3	682487	In	Al	-2.493071717	OrthoPerovskite_GdFeO3	-2.4509168	train	-2.1980545520782466	-2.440931763046247	In	Al	5.0807519999999995	5.259455	7.410921000000001	90.0	90.0	90.0	orthorhombic	orthorhombic	0	0
118	AlPbO3	682922	Pb	Al	-2.114603074	OrthoPerovskite_GdFeO3	-2.1344369999999997	train	-1.941448450088501	-2.1069687450083348	Pb	Al	5.3142830000000005	5.412537	7.53372	90.0	90.0	90.0	orthorhombic	orthorhombic	0	0
119	AlPbO3	682923	Al	Pb	-1.9585352480000002	OrthoPerovskite_GdFeO3	-2.027947	train	-2.0757076740264893	-1.9945959433607823			5.466598	5.475199	8.469909	90.0	90.0	90.0	tetragonal	other	4	4
120	AlSbO3	693060	Sb	Al	-2.22223445	OrthoPerovskite_GdFeO3	-2.2136473999999997	train	-2.085155963897705	-2.1905549462255696	Sb	Al	5.222525	5.390331	7.49671	90.0	90.0	90.0	orthorhombic	orthorhombic	1	1
121	AlSnO3	693314	Sn	Al	-2.2694382859999997	OrthoPerovskite_GdFeO3	-2.1891243	test	-2.156893491744995	-2.1646771224666903	Sn	Al	5.201083000000001	5.363843	7.415902	90.0	90.0	90.0	orthorhombic	orthorhombic	0	1
122	AlTeO3	693500	Te	Al	-1.8691420980000002	OrthoPerovskite_GdFeO3	-1.9705112	train	-1.8834072351455688	-1.9339872311730786			5.331326	5.340546	7.5210740000000005	90.0	90.0	90.0	tetragonal	other	0	0
123	AlTlO3	682832	Tl	Al	-2.028060834	OrthoPerovskite_GdFeO3	-2.0895293	train	-1.761638045310974	-2.059580219658088	Tl	Al	5.208073000000001	5.325686	7.533257000000001	90.0	90.0	90.0	orthorhombic	orthorhombic	0	1
124	AlTlO3	682833	Al	Tl	-1.911245637	OrthoPerovskite_GdFeO3	-1.9186159	train	-2.0361790657043457	-1.8792250915041873			5.285259	5.409848	8.500185	90.0	90.0	90.0	orthorhombic	other	2	2
125	AlVO3	682699	Al	V	-2.798986497	OrthoPerovskite_GdFeO3	-2.7928015999999998	train	-2.7433066368103027	-2.801703223434202			5.004098	5.029706	7.635636999999999	90.0	90.0	90.0	orthorhombic	other	1	0
126	AlVO3	682700	V	Al	-2.8627423739999998	OrthoPerovskite_GdFeO3	-2.7050127999999996	train	-2.785904884338379	-2.7090647277136957	V	Al	4.980983999999999	5.175382	6.934622999999999	90.0	90.0	90.0	orthorhombic	orthorhombic	0	2
127	AsPbO3	682686	As	Pb	-1.311089711	OrthoPerovskite_GdFeO3	-1.3404591000000001	test	-1.1526837348937988	-1.2691293134256447			5.617036	6.320521	8.377671000000001	90.0	90.0	90.0	orthorhombic	other	1	2
128	BaAcO3	682220	Ac	Ba	-2.741404385	OrthoPerovskite_GdFeO3	-2.7055314	test	-2.5000600814819336	-2.70961197660969			6.315302	6.355862999999999	10.43551	90.0	90.0	90.0	orthorhombic	other	2	3
129	BaAcO3	682221	Ba	Ac	-2.8566324869999997	OrthoPerovskite_GdFeO3	-2.9326098	test	-2.760678291320801	-2.9492348144502736	Ba	Ac	6.448758	6.603146000000001	9.197658	90.0	90.0	90.0	orthorhombic	orthorhombic	0	0
130	BaAgO3	682132	Ba	Ag	-1.25900778	OrthoPerovskite_GdFeO3	-1.3528445	train	-1.2250509262084959	-1.2821989171210677	Ba	Ag	5.848954	5.891731	8.361677	90.0	90.0	90.0	orthorhombic	orthorhombic	1	3
131	BaAgO3	682133	Ag	Ba	-0.9888815959999999	OrthoPerovskite_GdFeO3	-1.1282711	train	-0.744918942451477	-1.0452194623974638	Ba	Ag	6.636301	6.739436	6.989871000000001	90.0	90.0	90.0	orthorhombic	orthorhombic	4	4
132	BaAlO3	682703	Al	Ba	-2.722176567	OrthoPerovskite_GdFeO3	-2.7137074	train	-2.742304563522339	-2.718239641425827			5.405362	6.292811	9.01868	90.0	90.0	90.0	orthorhombic	other	0	3
133	BaAsO3	682256	As	Ba	-2.110612946	OrthoPerovskite_GdFeO3	-2.188418	train	-1.7649093866348269	-2.1639318045044056			5.930314	6.406647	9.549074000000001	90.0	90.0	90.0	orthorhombic	other	0	0
134	BaAuO3	682498	Au	Ba	-1.077697172	OrthoPerovskite_GdFeO3	-1.1585784	train	-0.8679413795471191	-1.0772010213360763			6.37328	6.545226	8.831194	90.0	90.0	90.0	orthorhombic	other	4	5
135	BaAuO3	682499	Ba	Au	-1.309261263	OrthoPerovskite_GdFeO3	-1.3654152	train	-1.1813141107559204	-1.2954640573001537	Ba	Au	5.851526	5.882798	8.477688	90.0	90.0	90.0	orthorhombic	orthorhombic	0	2
136	BaBiO3	681537	Ba	Bi	-2.065575035	OrthoPerovskite_GdFeO3	-2.1577735000000002	train	-1.8851118087768557	-2.131594417706693	Ba	Bi	6.17702	6.179353	8.732702	90.0	90.0	90.0	tetragonal	tetragonal	1	0
137	BaBiO3	681538	Bi	Ba	-1.867924805	OrthoPerovskite_GdFeO3	-1.8834389999999999	train	-1.835458755493164	-1.8421049224152979			6.364721	6.474	9.488947999999999	90.0	90.0	90.0	orthorhombic	other	4	4
138	BaCaO3	693461	Ba	Ca	-2.11782889	OrthoPerovskite_GdFeO3	-2.212535	train	-1.9896950721740725	-2.189381094177934	Ba	Ca	6.124384	6.367344	8.704989	90.0	90.0	90.0	orthorhombic	orthorhombic	0	0
139	BaCdO3	681525	Ba	Cd	-1.481698449	OrthoPerovskite_GdFeO3	-1.4333131000000001	test	-1.5876089334487915	-1.3671128247805313	Ba	Cd	5.952927	5.993846150000001	5.99384615	60.75241546	60.22557491999999	60.22557491999999	triclinic	triclinic	1	2
140	BaCdO3	681526	Cd	Ba	-1.5353523130000002	OrthoPerovskite_GdFeO3	-1.6439603999999999	test	-1.5038325786590576	-1.5893968632864246			6.480624	6.49225	8.169413	90.0	90.0	90.0	tetragonal	other	0	0
141	BaCeO3	681918	Ba	Ce	-2.7836482389999997	OrthoPerovskite_GdFeO3	-2.8126142000000005	test	-2.8485321998596187	-2.8226103261661244	Ba	Ce	6.354522	6.4963120000000005	9.065872	90.0	90.0	90.0	orthorhombic	orthorhombic	0	1
142	BaCeO3	681919	Ce	Ba	-2.6753127340000002	OrthoPerovskite_GdFeO3	-2.6962933999999996	test	-2.6559162139892583	-2.6998636439810855			6.203179	6.229387	10.355146000000001	90.0	90.0	90.0	tetragonal	other	4	4
143	BaCoO3	682148	Co	Ba	-1.7481410919999998	OrthoPerovskite_GdFeO3	-1.7305858	test	-1.5273575782775881	-1.6808076895784705			6.088707	6.626849000000001	9.234307000000001	90.0	90.0	90.0	orthorhombic	other	5	5
144	BaCoO3	682149	Ba	Co	-1.8420830000000001	OrthoPerovskite_GdFeO3	-1.8843827000000002	test	-1.793915867805481	-1.8431007550091079	Ba	Co	4.0059605000000005	5.6418800000000005	5.64596	90.00314300000002	90.0	90.0	tetragonal	tetragonal	0	1
145	BaCrO3	681750	Cr	Ba	-2.444598778	OrthoPerovskite_GdFeO3	-2.3860349999999997	train	-2.5225934982299805	-2.3724657132581335			5.0179279999999995	5.889023	10.800589	90.0	90.0	90.0	orthorhombic	other	3	3
146	BaCrO3	681751	Ba	Cr	-2.461042166	OrthoPerovskite_GdFeO3	-2.4725666	train	-2.4296817779541016	-2.463777557779172	Ba	Cr	3.941119	3.96475233	3.96475233	90.00730630000002	90.0	90.0	tetragonal	tetragonal	0	0
147	BaCuO3	682364	Ba	Cu	-1.457156911	OrthoPerovskite_GdFeO3	-1.4491353999999999	train	-1.379604697227478	-1.3838091923221603	Ba	Cu	3.9621739999999996	3.96898369	3.96885949	89.94120267	90.0	90.0	cubic	cubic	1	2
148	BaCuO3	682365	Cu	Ba	-1.4346753190000001	OrthoPerovskite_GdFeO3	-1.4720268	train	-1.497633695602417	-1.4079651764674772			5.484072	6.13276368	6.13276368	61.78748714	63.44141737000001	63.44141737000001	triclinic	other	4	0
149	BaDyO3	682064	Ba	Dy	-2.980611107	OrthoPerovskite_GdFeO3	-3.037662	test	-2.8785200119018555	-3.060090388055674	Ba	Dy	6.176662	6.199483	8.742927	90.0	90.0	90.0	tetragonal	tetragonal	0	0
150	BaDyO3	682065	Dy	Ba	-2.831188022	OrthoPerovskite_GdFeO3	-2.7861683	test	-2.71651291847229	-2.7947034816258753			6.509306	6.78655	8.352897	90.0	90.0	90.0	orthorhombic	other	4	4
151	BaErO3	682789	Ba	Er	-3.015511782	OrthoPerovskite_GdFeO3	-3.040505	train	-2.9477429389953613	-3.063090443225962	Ba	Er	6.144689	6.159154	8.689210000000001	90.0	90.0	90.0	tetragonal	tetragonal	0	1
152	BaErO3	682790	Er	Ba	-2.848058992	OrthoPerovskite_GdFeO3	-2.941814	train	-2.781091690063477	-2.9589474798735473			6.465169	6.766610000000001	8.308563000000001	90.0	90.0	90.0	orthorhombic	other	4	4
153	BaEuO3	682707	Eu	Ba	-2.440316161	OrthoPerovskite_GdFeO3	-2.427898	test	-2.459315061569214	-2.4166413409731446			6.580139	6.659062	8.056125	90.0	90.0	90.0	orthorhombic	other	0	2
154	BaEuO3	682708	Ba	Eu	-2.2984176030000003	OrthoPerovskite_GdFeO3	-2.5147016	test	-2.350318193435669	-2.5082402115252482	Ba	Eu	6.295662999999999	6.422173	8.729144	90.0	90.0	90.0	orthorhombic	orthorhombic	1	1
155	BaFeO3	681755	Fe	Ba	-1.9741022330000002	OrthoPerovskite_GdFeO3	-2.0414932	train	-1.824475884437561	-2.0088904728534867			5.361504	6.1669480000000005	9.82519	90.0	90.0	90.0	orthorhombic	other	3	2
156	BaGaO3	682428	Ba	Ga	-2.146301892	OrthoPerovskite_GdFeO3	-2.1219459	test	-2.039600372314453	-2.093787602153046	Ba	Ga	4.0197265	4.02048842	4.02062315	90.04921497000002	90.0	90.0	cubic	cubic	2	4
157	BaGaO3	682429	Ga	Ba	-2.1442060169999997	OrthoPerovskite_GdFeO3	-2.2643254	test	-1.9943799972534182	-2.244032538881169			5.418032	6.342536	9.417171000000002	90.0	90.0	90.0	orthorhombic	other	4	0
158	BaGdO3	681446	Gd	Ba	-2.8088635560000004	OrthoPerovskite_GdFeO3	-2.8814995	test	-2.671656608581543	-2.8953010403489783			6.506736	6.792838000000001	8.516722	90.0	90.0	90.0	orthorhombic	other	4	4
159	BaGdO3	681447	Ba	Gd	-2.942680769	OrthoPerovskite_GdFeO3	-2.8897603	test	-2.9186511039733887	-2.9040181897512705	Ba	Gd	6.207138	6.271024	8.798442	90.0	90.0	90.0	orthorhombic	orthorhombic	0	3
160	BaGeO3	681569	Ge	Ba	-2.393875048	OrthoPerovskite_GdFeO3	-2.4233917999999997	train	-2.170989990234375	-2.411886206042313			5.186457	6.053414	11.005684	90.0	90.0	90.0	orthorhombic	other	0	0
161	BaGeO3	681570	Ba	Ge	-2.298433965	OrthoPerovskite_GdFeO3	-2.28697	train	-2.314067840576172	-2.2679280891130045	Ba	Ge	3.9461215	3.94678161	3.94677803	90.01481259000002	90.0	90.0	cubic	cubic	3	5
162	BaHfO3	682528	Hf	Ba	-3.267651833	OrthoPerovskite_GdFeO3	-3.2869517999999998	train	-3.2099390029907227	-3.323151644963911			5.991969999999999	6.133973999999999	10.096738	90.0	90.0	90.0	orthorhombic	other	3	3
163	BaHfO3	682529	Ba	Hf	-3.624567251	OrthoPerovskite_GdFeO3	-3.5167928	train	-3.3942899703979488	-3.5656896964567766	Ba	Hf	4.1729864999999995	4.17380893	4.17380936	90.00055329	90.0	90.0	cubic	cubic	1	1
164	BaHgO3	681444	Ba	Hg	-1.256338816	OrthoPerovskite_GdFeO3	-1.3329958999999998	train	-1.292619228363037	-1.2612538256497403	Ba	Hg	6.003875	6.089519	8.542954	90.0	90.0	90.0	orthorhombic	orthorhombic	0	0
165	BaHgO3	681445	Hg	Ba	-1.0257062940000001	OrthoPerovskite_GdFeO3	-0.99859005	train	-0.825150728225708	-0.9083744731111792			6.5316790000000005	6.572244	8.619557	90.0	90.0	90.0	orthorhombic	other	4	4
166	BaHoO3	682838	Ba	Ho	-2.9985027669999997	OrthoPerovskite_GdFeO3	-3.08087	train	-2.9416069984436035	-3.1056853172845917	Ba	Ho	6.159145	6.171131	8.726564999999999	90.0	90.0	90.0	tetragonal	tetragonal	0	0
167	BaHoO3	682839	Ho	Ba	-2.84027384	OrthoPerovskite_GdFeO3	-2.8562474	train	-2.770904541015625	-2.8686539446171335			6.493193	6.781697	8.309069000000001	90.0	90.0	90.0	orthorhombic	other	4	4
168	BaInO3	681354	Ba	In	-1.9972485869999999	OrthoPerovskite_GdFeO3	-1.9383981	train	-1.9598698616027832	-1.900100114856166	Ba	In	4.2400715	4.241141630000001	4.24114163	89.93337966	90.0	90.0	cubic	cubic	1	3
169	BaInO3	681355	In	Ba	-1.846055655	OrthoPerovskite_GdFeO3	-1.9338794	train	-1.6228229999542236	-1.895331789390819			5.838158	6.549653	9.523749	90.0	90.0	90.0	orthorhombic	other	4	4
170	BaIrO3	682026	Ir	Ba	-1.575574515	OrthoPerovskite_GdFeO3	-1.6358426000000001	train	-1.5674313306808472	-1.5808306135989942			5.378085	6.438381719999999	6.43838172	66.45453377	65.31317621	65.31317621	triclinic	other	4	4
171	BaIrO3	682027	Ba	Ir	-1.727155089	OrthoPerovskite_GdFeO3	-1.7601448	train	-1.6820555925369265	-1.7119996103588255	Ba	Ir	5.703396	5.7732220000000005	8.105681	90.0	90.0	90.0	orthorhombic	orthorhombic	0	2
172	BaLaO3	681886	Ba	La	-2.902530652	OrthoPerovskite_GdFeO3	-2.9709966	train	-2.8280565738677983	-2.9897422072785607	Ba	La	6.340321	6.440658	9.016855	90.0	90.0	90.0	orthorhombic	orthorhombic	0	0
173	BaLaO3	681887	La	Ba	-2.786524693	OrthoPerovskite_GdFeO3	-2.8211935	train	-2.2860512733459477	-2.8316635703878803			6.6603259999999995	6.721908	8.977319999999999	90.0	90.0	90.0	orthorhombic	other	4	4
174	BaLuO3	681587	Lu	Ba	-2.871304065	OrthoPerovskite_GdFeO3	-2.8439302000000004	test	-2.8279693126678467	-2.855656308478029			6.408815	6.752974000000001	8.179608	90.0	90.0	90.0	orthorhombic	other	4	4
175	BaLuO3	681588	Ba	Lu	-3.0675601319999997	OrthoPerovskite_GdFeO3	-3.0722082000000004	test	-2.9593873023986816	-3.096545015535031	Ba	Lu	6.084805	6.086982	8.612955	90.0	90.0	90.0	tetragonal	tetragonal	0	2
176	BaMgO3	682576	Mg	Ba	-2.188754166	OrthoPerovskite_GdFeO3	-2.223061	test	-2.1204042434692383	-2.200488579483053			6.135799	6.627483	7.863214999999999	90.0	90.0	90.0	orthorhombic	other	0	0
177	BaMgO3	682577	Ba	Mg	-2.112253587	OrthoPerovskite_GdFeO3	-2.0783725	test	-2.1832211017608643	-2.04780708721916	Ba	Mg	4.07063975	4.0704975	4.07069112	90.0	90.18205541000002	90.0	cubic	cubic	2	2
178	BaMnO3	681460	Mn	Ba	-2.123921053	OrthoPerovskite_GdFeO3	-2.211464	test	-2.2569289207458496	-2.1882509291806147			5.643489	6.015215	9.832349	90.0	90.0	90.0	orthorhombic	other	3	1
179	BaMoO3	681942	Mo	Ba	-2.260579402	OrthoPerovskite_GdFeO3	-2.3361595	test	-2.4158921241760254	-2.3198349529184537			5.257708	6.593416	9.725164999999999	90.0	90.0	90.0	orthorhombic	other	5	5
180	BaMoO3	681943	Ba	Mo	-2.585182814	OrthoPerovskite_GdFeO3	-2.7803937999999997	test	-2.483884334564209	-2.7886099823009265	Ba	Mo	4.05577	4.0573713599999985	4.05737136	90.02177803	90.0	90.0	cubic	cubic	1	0
181	BaNbO3	682740	Nb	Ba	-2.684741158	OrthoPerovskite_GdFeO3	-2.7251727999999997	test	-2.790745496749878	-2.7303384217808824			5.693382	6.538163	9.589176	90.0	90.0	90.0	orthorhombic	other	4	4
182	BaNbO3	682741	Ba	Nb	-3.0164696380000002	OrthoPerovskite_GdFeO3	-2.9678721	test	-2.9777894020080566	-2.9864451012709754	Ba	Nb	4.12450955	4.12450955	4.126796499999999	90.0	90.0	90.03895723	cubic	cubic	1	2
183	BaNdO3	681922	Nd	Ba	-2.7010457000000003	OrthoPerovskite_GdFeO3	-2.740392	test	-2.782880544662476	-2.74639837241319			6.117871	6.118246	10.463355	90.0	90.0	90.0	tetragonal	other	4	4
184	BaNdO3	681923	Ba	Nd	-2.841264957	OrthoPerovskite_GdFeO3	-2.8717667999999996	test	-2.903092861175537	-2.885030679126374	Ba	Nd	6.299851	6.404116	8.959462	90.0	90.0	90.0	orthorhombic	orthorhombic	0	1
185	BaNiO3	682288	Ni	Ba	-1.394973065	OrthoPerovskite_GdFeO3	-1.7045455000000003	test	-1.4558136463165283	-1.6533288515021933			5.7479510000000005	6.519206	9.815104	90.0	90.0	90.0	orthorhombic	other	4	3
186	BaNiO3	682289	Ba	Ni	-1.5907210680000001	OrthoPerovskite_GdFeO3	-1.472046	test	-1.5554345846176147	-1.4079854371284937	Ba	Ni	3.98944365	3.98944365	3.9893980000000004	90.0	90.0	89.64672495	cubic	cubic	0	5
187	BaNpO3	682214	Np	Ba	-3.0671531880000003	OrthoPerovskite_GdFeO3	-3.097645	train	-3.115777015686035	-3.123387014604882			6.602169	6.690973	8.307509	90.0	90.0	90.0	orthorhombic	other	3	3
188	BaNpO3	682215	Ba	Np	-3.3892137730000003	OrthoPerovskite_GdFeO3	-3.3610613	train	-3.335487365722656	-3.4013551583801878	Ba	Np	6.233188	6.272574	8.848927999999999	90.0	90.0	90.0	orthorhombic	orthorhombic	0	0
189	BaOsO3	681944	Os	Ba	-1.629137775	OrthoPerovskite_GdFeO3	-1.6911175999999999	train	-1.765299916267395	-1.6391591572281468			4.994423	6.753194000000001	9.724089	90.0	90.0	90.0	orthorhombic	other	5	5
190	BaOsO3	681945	Ba	Os	-1.872934655	OrthoPerovskite_GdFeO3	-1.9867225	train	-1.8498464822769165	-1.9510940881488414	Ba	Os	4.03007561	4.03007765	4.0417985	90.0	90.0	90.01005297	cubic	cubic	1	1
191	BaPaO3	682404	Pa	Ba	-2.811650645	OrthoPerovskite_GdFeO3	-2.783303	train	-3.002098560333252	-2.7916798945420114			6.693842999999999	6.733892999999999	8.348044999999999	90.0	90.0	90.0	orthorhombic	other	3	3
192	BaPaO3	682405	Ba	Pa	-3.1525170989999998	OrthoPerovskite_GdFeO3	-3.2599237000000003	train	-3.3023929595947266	-3.2946304380880522	Ba	Pa	6.3164050000000005	6.360908	8.958821	90.0	90.0	90.0	orthorhombic	orthorhombic	0	0
193	BaPbO3	682711	Pb	Ba	-1.722963861	OrthoPerovskite_GdFeO3	-1.7579261999999998	train	-1.4974982738494873	-1.7096584487686737			6.153313	6.322107	9.889441	90.0	90.0	90.0	orthorhombic	other	4	4
194	BaPbO3	682712	Ba	Pb	-1.947408705	OrthoPerovskite_GdFeO3	-2.001383	train	-1.8697527647018437	-1.9665644746504283	Ba	Pb	6.087514	6.119686	8.633159	90.0	90.0	90.0	orthorhombic	orthorhombic	0	0
195	BaPdO3	682508	Pd	Ba	-1.2840271490000001	OrthoPerovskite_GdFeO3	-1.4301674	test	-1.3113553524017334	-1.3637933476264068			6.27534	6.323111	9.205306	90.0	90.0	90.0	orthorhombic	other	5	5
196	BaPdO3	682509	Ba	Pd	-1.536175245	OrthoPerovskite_GdFeO3	-1.618665	test	-1.4570559263229368	-1.5627040755430168	Ba	Pd	5.733194	5.79255	8.218949	90.0	90.0	90.0	orthorhombic	orthorhombic	0	2
197	BaPmO3	681996	Ba	Pm	-2.8722184389999996	OrthoPerovskite_GdFeO3	-2.9108045	train	-2.7748587131500244	-2.926224929467971	Ba	Pm	6.264983	6.366078	8.915272	90.0	90.0	90.0	orthorhombic	orthorhombic	0	1
198	BaPmO3	681997	Pm	Ba	-2.725364912	OrthoPerovskite_GdFeO3	-2.7548711	train	-2.624961376190185	-2.7616773378778823			6.055105999999999	6.0941160000000005	10.489014	90.0	90.0	90.0	orthorhombic	other	4	4
199	BaPrO3	682760	Pr	Ba	-2.7012585810000003	OrthoPerovskite_GdFeO3	-2.7482305	train	-2.647188663482666	-2.7546698927973985			6.162798	6.172723	10.44688	90.0	90.0	90.0	tetragonal	other	4	3
200	BaPrO3	682761	Ba	Pr	-2.814895921	OrthoPerovskite_GdFeO3	-2.8653923999999997	train	-2.7849395275115967	-2.8783041396689395	Ba	Pr	6.322757	6.445558	9.008295	90.0	90.0	90.0	orthorhombic	orthorhombic	0	0
201	BaPtO3	682793	Pt	Ba	-1.432225291	OrthoPerovskite_GdFeO3	-1.5240441999999998	train	-1.3750617504119873	-1.4628561612775195			6.333982	6.488185	9.222248	90.0	90.0	90.0	orthorhombic	other	3	3
202	BaPtO3	682794	Ba	Pt	-1.586577394	OrthoPerovskite_GdFeO3	-1.5998445	train	-1.5748941898345947	-1.5428438791545505	Ba	Pt	5.743224	5.830404	8.218031	90.0	90.0	90.0	orthorhombic	orthorhombic	0	2
203	BaPuO3	681787	Pu	Ba	-2.9508549110000004	OrthoPerovskite_GdFeO3	-3.0215888	test	-2.9417541027069087	-3.043129260105242			6.6811929999999995	6.709446000000001	8.087474	90.0	90.0	90.0	tetragonal	other	3	3
204	BaReO3	681912	Re	Ba	-1.899392575	OrthoPerovskite_GdFeO3	-1.9734182	test	-2.1250646114349365	-1.9370548218800883			5.098718	6.781708999999999	9.56461	90.0	90.0	90.0	orthorhombic	other	4	4
205	BaRhO3	681724	Rh	Ba	-1.487051581	OrthoPerovskite_GdFeO3	-1.495752	train	-1.4876070022583008	-1.4330010220271403			5.842829	6.266488	9.399131	90.0	90.0	90.0	orthorhombic	other	5	5
206	BaRhO3	681725	Ba	Rh	-1.7560785069999998	OrthoPerovskite_GdFeO3	-1.8150324	train	-1.6241984367370603	-1.7699193529422628	Ba	Rh	5.704517	5.751197	8.095092999999999	90.0	90.0	90.0	orthorhombic	orthorhombic	0	1
207	BaRuO3	681908	Ru	Ba	-1.7587867480000001	OrthoPerovskite_GdFeO3	-1.8835466	test	-1.6551434993743896	-1.8422184665364105			6.407228	6.761703	9.23422	90.0	90.0	90.0	orthorhombic	other	5	4
208	BaRuO3	681909	Ba	Ru	-1.952565703	OrthoPerovskite_GdFeO3	-1.9366218999999998	test	-1.8877439498901367	-1.8982257926635993	Ba	Ru	4.03609558	4.0360957200000005	4.035947	90.0	90.0	90.03077644	cubic	cubic	1	1
209	BaSbO3	682052	Sb	Ba	-2.061329747	OrthoPerovskite_GdFeO3	-2.1625874	train	-2.0494089126586914	-2.1366742508351666			6.125030000000001	6.313441	9.618062	90.0	90.0	90.0	orthorhombic	other	3	3
210	BaScO3	681471	Sc	Ba	-2.817754692	OrthoPerovskite_GdFeO3	-2.7630122000000004	test	-2.6845598220825195	-2.770268174721651			6.038182	6.550122	8.747802	90.0	90.0	90.0	orthorhombic	other	4	4
211	BaScO3	681472	Ba	Sc	-3.042484602	OrthoPerovskite_GdFeO3	-3.1124034	test	-2.9160561561584477	-3.1389607093727965	Ba	Sc	4.176769999999999	4.17783038	4.17782338	90.11428437	90.0	90.0	cubic	cubic	1	1
212	BaSmO3	682262	Sm	Ba	-2.733392933	OrthoPerovskite_GdFeO3	-2.7412872000000004	train	-2.801766395568848	-2.7473430257330786			6.032195	6.058231	10.509942	90.0	90.0	90.0	tetragonal	other	4	4
213	BaSmO3	682263	Ba	Sm	-2.887883499	OrthoPerovskite_GdFeO3	-2.9550989	train	-2.9136669635772705	-2.9729662744327316	Ba	Sm	6.260626	6.334872	8.876928	90.0	90.0	90.0	orthorhombic	orthorhombic	0	0
214	BaSnO3	681854	Ba	Sn	-2.442220376	OrthoPerovskite_GdFeO3	-2.4636237999999997	train	-2.353365421295166	-2.454340732813694	Ba	Sn	4.15356	4.15603014	4.15603014	89.89043882	90.0	90.0	cubic	cubic	2	0
215	BaSnO3	681855	Sn	Ba	-2.182380087	OrthoPerovskite_GdFeO3	-2.232052	train	-2.097340583801269	-2.2099762671496244			5.751818	5.876659	10.949124000000001	90.0	90.0	90.0	orthorhombic	other	4	4
216	BaTaO3	682524	Ba	Ta	-3.10833419	OrthoPerovskite_GdFeO3	-3.1323323	test	-2.781853437423706	-3.159990536837854			5.799771	5.804787	8.209404	89.999994	89.999996	89.999994	tetragonal	other	1	0
217	BaTaO3	682525	Ta	Ba	-2.7905254630000003	OrthoPerovskite_GdFeO3	-2.7489282999999998	test	-2.8376526832580566	-2.7554062411962117			5.528884	6.607932000000001	9.748025	90.0	90.0	90.0	orthorhombic	other	4	5
218	BaTbO3	681521	Tb	Ba	-2.689868456	OrthoPerovskite_GdFeO3	-2.7671287	train	-2.529012680053711	-2.7746120815484154			6.500128	6.765861999999999	8.503805999999999	90.0	90.0	90.0	orthorhombic	other	4	4
219	BaTbO3	681522	Ba	Tb	-2.83127357	OrthoPerovskite_GdFeO3	-2.8660982	train	-2.784918069839477	-2.879048930009844	Ba	Tb	6.1885639999999995	6.242586	8.773163	90.0	90.0	90.0	orthorhombic	orthorhombic	0	2
220	BaTcO3	681400	Ba	Tc	-2.253869979	OrthoPerovskite_GdFeO3	-2.3384669999999996	test	-2.1440575122833248	-2.322269925590082			5.696493	5.6967539999999985	8.061924000000001	90.0	90.0	90.000008	tetragonal	other	1	2
221	BaTcO3	681401	Tc	Ba	-1.979056945	OrthoPerovskite_GdFeO3	-1.9704161	test	-2.1295120716094966	-1.933886877586482			5.100124	6.570221000000001	9.883797999999999	90.0	90.0	90.0	orthorhombic	other	5	5
222	BaTeO3	681648	Te	Ba	-2.150938527	OrthoPerovskite_GdFeO3	-2.2341602000000003	train	-1.7720723152160645	-2.2122009299389322			6.303376	6.869263	9.105272	90.0	90.0	90.0	orthorhombic	other	0	0
223	BaTeO3	681649	Ba	Te	-2.0280778930000003	OrthoPerovskite_GdFeO3	-2.075793	train	-1.9213862419128416	-2.0450850885164664	Ba	Te	4.307608999999999	6.083146	6.085167	90.0	90.0	90.0	tetragonal	tetragonal	3	4
224	BaThO3	681467	Th	Ba	-3.3447859380000002	OrthoPerovskite_GdFeO3	-3.2631834	train	-3.090030670166016	-3.298070212916961			6.799316	6.828505000000001	8.210163	90.0	90.0	90.0	tetragonal	other	4	4
225	BaThO3	681468	Ba	Th	-3.620250992	OrthoPerovskite_GdFeO3	-3.6007686000000003	train	-3.2674989700317383	-3.6543045515285635	Ba	Th	6.368757	6.442699	9.045247	90.0	90.0	90.0	orthorhombic	orthorhombic	0	1
226	BaTiO3	681890	Ba	Ti	-3.281254014	OrthoPerovskite_GdFeO3	-3.3558687999999997	train	-3.088305950164795	-3.3958758103422975	Ba	Ti	4.00627787	4.00627787	4.0077185	90.0	90.0	89.9953785	cubic	cubic	1	0
227	BaTiO3	681891	Ti	Ba	-3.152332921	OrthoPerovskite_GdFeO3	-3.159806	train	-3.0638890266418457	-3.1889819598881344			5.8502410000000005	5.950079	10.054260000000001	90.0	90.0	90.0	orthorhombic	other	4	3
228	BaTlO3	682126	Tl	Ba	-1.45710199	OrthoPerovskite_GdFeO3	-1.5753996000000001	test	-1.1955468654632568	-1.5170485753796021			5.129005	6.623120000000001	6.76732921	119.29755191	112.26886969999998	90.0	error	other	4	4
229	BaTlO3	682127	Ba	Tl	-1.548279154	OrthoPerovskite_GdFeO3	-1.6738718000000001	test	-1.5338964462280271	-1.6209606516158515	Ba	Tl	6.06489	6.146863	8.629997	90.0	90.0	90.0	orthorhombic	orthorhombic	0	2
230	BaTmO3	681690	Tm	Ba	-2.86121335	OrthoPerovskite_GdFeO3	-2.9603696	test	-2.8245673179626465	-2.9785281424545533			6.428628	6.759663000000001	8.299155	90.0	90.0	90.0	orthorhombic	other	3	2
231	BaTmO3	681691	Ba	Tm	-3.040075085	OrthoPerovskite_GdFeO3	-2.9956188	test	-3.0407898426055913	-3.015724605595082	Ba	Tm	6.1284849999999995	6.128439	8.649577	90.0	90.0	90.0	tetragonal	tetragonal	0	1
232	BaUO3	681880	U	Ba	-3.2198773210000002	OrthoPerovskite_GdFeO3	-3.097968	train	-3.3068833351135254	-3.1237278580167716			5.856330000000001	6.008021	10.773143	90.0	90.0	90.0	orthorhombic	other	3	4
233	BaUO3	681881	Ba	U	-3.46008951	OrthoPerovskite_GdFeO3	-3.4220686000000002	train	-3.603414058685303	-3.465732670089764	Ba	U	6.255932	6.319764	8.893305	90.0	90.0	90.0	orthorhombic	orthorhombic	0	0
234	BaVO3	682150	Ba	V	-2.801001362	OrthoPerovskite_GdFeO3	-2.7354244999999997	test	-2.7601168155670166	-2.7411564539965854	Ba	V	4.0710205	5.583411	5.584251	90.0	90.0	90.0	tetragonal	tetragonal	0	2
235	BaVO3	682151	V	Ba	-2.703749787	OrthoPerovskite_GdFeO3	-2.7342237999999996	test	-2.7023167610168457	-2.7398894240131293			5.415836	5.95329	10.294998	90.0	90.0	90.0	orthorhombic	other	4	3
236	BaWO3	682306	W	Ba	-2.25676048	OrthoPerovskite_GdFeO3	-2.3019688	train	-2.498208999633789	-2.2837554642407283			5.197998999999999	6.767416000000001	9.61069	90.0	90.0	90.0	orthorhombic	other	5	5
237	BaWO3	682307	Ba	W	-2.5698683630000003	OrthoPerovskite_GdFeO3	-2.5503522999999997	train	-2.5845017433166504	-2.5458603546344265	Ba	W	4.05842487	4.05842487	4.0606235	90.0	90.0	89.99935112	cubic	cubic	1	1
238	BaYO3	682280	Y	Ba	-2.811260616	OrthoPerovskite_GdFeO3	-2.8651326	train	-2.6989753246307373	-2.878029987599562			6.515007	6.786589	8.403136	90.0	90.0	90.0	orthorhombic	other	4	3
239	BaYO3	682281	Ba	Y	-2.956603795	OrthoPerovskite_GdFeO3	-2.9625225	train	-2.8790030479431152	-2.9807999745952896	Ba	Y	6.1852529999999994	6.24219	8.75912	90.0	90.0	90.0	orthorhombic	orthorhombic	0	1
240	BaYbO3	682862	Yb	Ba	-2.432561452	OrthoPerovskite_GdFeO3	-2.41554	train	-2.447495698928833	-2.40360065092938	Ba	Yb	6.360506	6.426094	8.179973	90.0	90.0	90.0	orthorhombic	orthorhombic	0	0
241	BaYbO3	682863	Ba	Yb	-2.276159909	OrthoPerovskite_GdFeO3	-2.3216162000000002	train	-2.338247776031494	-2.304488240868488	Ba	Yb	6.056286	6.142946	8.631835	90.0	90.0	90.0	orthorhombic	orthorhombic	2	2
242	BaZnO3	681842	Zn	Ba	-1.711642162	OrthoPerovskite_GdFeO3	-1.7064947	train	-1.5797791481018066	-1.6553857306924589			6.108186	6.555324000000001	8.065054	90.0	90.0	90.0	orthorhombic	other	0	1
243	BaZnO3	681843	Ba	Zn	-1.663439374	OrthoPerovskite_GdFeO3	-1.8456345	train	-1.5628254413604736	-1.802211997446898	Ba	Zn	4.033913500000001	4.04148853	4.0415166	90.22218421	90.0	90.0	cubic	cubic	2	0
244	BaZrO3	681565	Zr	Ba	-3.166111275	OrthoPerovskite_GdFeO3	-3.2169168	train	-3.073349475860596	-3.249247718178425			6.081856	6.179921	9.958072	90.0	90.0	90.0	orthorhombic	other	4	4
245	BaZrO3	681566	Ba	Zr	-3.476868884	OrthoPerovskite_GdFeO3	-3.5650508000000003	train	-3.373412609100342	-3.616613601630104	Ba	Zr	5.97183389	5.971569000000001	5.97183389	60.001467270000006	60.01639825000001	60.001467270000006	rhombohedral	rhombohedral	1	0
246	BeBiO3	693572	Bi	Be	-1.609250198	OrthoPerovskite_GdFeO3	-1.6110759	train	-1.6154158115386963	-1.554695732703469	Bi	Be	5.099568	5.366993	7.150746000000001	90.0	90.0	90.0	orthorhombic	orthorhombic	1	1
247	BiAsO3	693470	Bi	As	-1.2324239190000001	OrthoPerovskite_GdFeO3	-1.3457335	train	-1.165379524230957	-1.2746950858456825	Bi	As	5.545815	6.003597	8.080964999999999	90.0	90.0	90.0	orthorhombic	orthorhombic	0	0
248	BiMoO3	693221	Bi	Mo	-1.4708343000000001	OrthoPerovskite_GdFeO3	-1.4614464	test	-1.4837709665298462	-1.396800285956145	Bi	Mo	5.560073	5.910952	7.943866000000001	90.0	90.0	90.0	orthorhombic	orthorhombic	0	1
249	BiOsO3	693573	Bi	Os	-0.973260143	OrthoPerovskite_GdFeO3	-1.2120194	test	-0.9984347820281982	-1.1335942497410616	Bi	Os	5.3216790000000005	6.0089999999999995	7.7591660000000005	90.0	90.0	90.0	orthorhombic	orthorhombic	0	0
250	BiPbO3	682727	Bi	Pb	-1.220917062	OrthoPerovskite_GdFeO3	-1.2781796	train	-1.029541254043579	-1.2034093218751818	Bi	Pb	5.808834	6.235398	8.320867	90.0	90.0	90.0	orthorhombic	orthorhombic	2	0
251	BiPdO3	693152	Bi	Pd	-1.006070546	OrthoPerovskite_GdFeO3	-1.0795253999999999	train	-0.9007138013839722	-0.9937809153294651	Bi	Pd	5.512059	5.954039	7.781364999999999	90.0	90.0	90.0	orthorhombic	orthorhombic	0	0
252	BiRhO3	693277	Bi	Rh	-1.181774152	OrthoPerovskite_GdFeO3	-1.1988843999999999	train	-0.9966422319412231	-1.119733636071791	Bi	Rh	5.403430999999999	5.864764	7.78328	90.0	90.0	90.0	orthorhombic	orthorhombic	0	0
253	BiRuO3	693285	Bi	Ru	-1.1755119509999998	OrthoPerovskite_GdFeO3	-1.2103032	train	-1.0965361595153809	-1.1317832421141716	Bi	Ru	5.398303	5.847430999999999	7.8249059999999995	90.0	90.0	90.0	orthorhombic	orthorhombic	0	1
254	BiSbO3	693557	Bi	Sb	-1.364918425	OrthoPerovskite_GdFeO3	-1.3832043	train	-1.3345086574554443	-1.314235876304647	Bi	Sb	5.782521	6.2907910000000005	8.412719000000001	90.0	90.0	90.0	orthorhombic	orthorhombic	0	0
255	CaAcO3	693432	Ac	Ca	-2.9641995789999998	OrthoPerovskite_GdFeO3	-2.9397627999999996	train	-2.94588041305542	-2.9567829659216316	Ac	Ca	5.993582	6.269426999999999	8.448174	90.0	90.0	90.0	orthorhombic	orthorhombic	0	1
256	CaAgO3	682512	Ca	Ag	-1.34723314	OrthoPerovskite_GdFeO3	-1.345364	test	-1.3632475137710571	-1.2743051736453936	Ca	Ag	5.507072	5.818764	7.758641000000001	90.0	90.0	90.0	orthorhombic	orthorhombic	0	2
257	CaAlO3	682822	Ca	Al	-2.88414095	OrthoPerovskite_GdFeO3	-2.9256759999999997	train	-3.000718116760254	-2.941917972192185	Ca	Al	3.714464	3.71487767	3.71487767	90.08319052	90.0	90.0	cubic	cubic	1	1
258	CaAlO3	682823	Al	Ca	-2.797138157	OrthoPerovskite_GdFeO3	-2.771993	train	-2.933500051498413	-2.779745098912057			5.180435	5.611097	8.36394	90.0	90.0	90.0	orthorhombic	other	4	4
259	CaAsO3	682669	As	Ca	-2.181710735	OrthoPerovskite_GdFeO3	-2.2514741000000003	train	-2.087322473526001	-2.2304712975832706			5.448886	5.929823000000001	8.519885	90.0	90.0	90.0	orthorhombic	other	0	0
260	CaAsO3	682670	Ca	As	-2.124279594	OrthoPerovskite_GdFeO3	-2.1513894000000002	train	-2.1621770858764653	-2.1248576423944745	Ca	As	5.387345	5.546823000000001	7.694853999999999	90.0	90.0	90.0	orthorhombic	orthorhombic	1	1
261	CaAuO3	693358	Ca	Au	-1.414110124	OrthoPerovskite_GdFeO3	-1.3712503999999999	train	-1.3246004581451416	-1.3016216098607116	Ca	Au	5.551159999999999	5.87753	7.652902	90.0	90.0	90.0	orthorhombic	orthorhombic	0	1
262	CaBeO3	682510	Be	Ca	-2.398040483	OrthoPerovskite_GdFeO3	-2.438549	test	-2.307462453842163	-2.4278807316234223			5.074415	5.730666	7.168372	90.0	90.0	90.0	orthorhombic	other	0	0
263	CaBeO3	682511	Ca	Be	-2.058544126	OrthoPerovskite_GdFeO3	-2.1938193	test	-2.222661256790161	-2.169631487230849	Ca	Be	3.55431255	3.55431255	3.5898044999999996	90.0	90.0	96.96817379	monoclinic	monoclinic	1	2
264	CaBiO3	682170	Ca	Bi	-2.094424439	OrthoPerovskite_GdFeO3	-2.1277939999999997	train	-2.054651260375977	-2.099958767345224	Ca	Bi	5.758051999999999	6.014631	8.329211	90.0	90.0	90.0	orthorhombic	orthorhombic	0	1
265	CaBiO3	682171	Bi	Ca	-2.0189791280000002	OrthoPerovskite_GdFeO3	-2.1647012	train	-1.9404289722442627	-2.138904822983937			5.738377	5.967341	8.520114999999999	90.0	90.0	90.0	orthorhombic	other	1	0
266	CaCdO3	693556	Ca	Cd	-1.521857775	OrthoPerovskite_GdFeO3	-1.6045356000000002	test	-1.7280932664871216	-1.5477941284719405	Ca	Cd	5.617674	5.945875	7.8531580000000005	90.0	90.0	90.0	orthorhombic	orthorhombic	0	2
267	CaCrO3	681370	Cr	Ca	-2.451675355	OrthoPerovskite_GdFeO3	-2.3821769	test	-2.51114559173584	-2.3683944811608812			5.465904	5.481006	8.527499	90.0	90.0	90.0	tetragonal	other	3	2
268	CaCrO3	681371	Ca	Cr	-2.611108781	OrthoPerovskite_GdFeO3	-2.2895038	test	-2.5527379512786865	-2.2706018632215077	Ca	Cr	5.3020760000000005	5.54015	7.5356309999999995	90.0	90.0	90.0	orthorhombic	orthorhombic	0	3
269	CaCuO3	681687	Cu	Ca	-1.456826112	OrthoPerovskite_GdFeO3	-1.6624941999999998	test	-1.429049730300903	-1.608954521575235			5.6595629999999995	5.775391	7.139188000000001	90.0	90.0	90.0	orthorhombic	other	3	0
270	CaDyO3	693540	Ca	Dy	-3.0359489739999996	OrthoPerovskite_GdFeO3	-3.0205371	train	-2.971277475357056	-3.0420194612932154			5.895149	6.118780999999999	7.854624	90.0	90.0	90.0	orthorhombic	other	0	0
271	CaErO3	693434	Ca	Er	-3.067568703	OrthoPerovskite_GdFeO3	-3.039201	train	-3.033318519592285	-3.061714406665267			5.86607	6.085687999999999	7.791056	90.0	90.0	90.0	orthorhombic	other	0	0
272	CaFeO3	682086	Ca	Fe	-2.101694179	OrthoPerovskite_GdFeO3	-2.1902293999999998	train	-2.037307977676392	-2.1658432712421685	Ca	Fe	5.527012	5.786389	7.911134	90.0	90.0	90.0	orthorhombic	orthorhombic	3	0
273	CaFeO3	682087	Fe	Ca	-1.995415186	OrthoPerovskite_GdFeO3	-1.9923127	train	-2.0513074398040767	-1.9569931062328885			5.4577029999999995	5.546765	8.475204	90.0	90.0	90.0	orthorhombic	other	4	4
274	CaGaO3	681910	Ca	Ga	-2.1945488419999997	OrthoPerovskite_GdFeO3	-2.2271254000000003	test	-2.24560546875	-2.204777508161956	Ca	Ga	5.304652	5.561946	7.622903999999999	90.0	90.0	90.0	orthorhombic	orthorhombic	2	3
275	CaGaO3	681911	Ga	Ca	-2.224919515	OrthoPerovskite_GdFeO3	-2.3308775	test	-2.194826364517212	-2.3142611606534302			5.274144000000001	5.665309	8.554573	90.0	90.0	90.0	orthorhombic	other	0	0
276	CaHfO3	681559	Ca	Hf	-3.668990688	OrthoPerovskite_GdFeO3	-3.6123074999999996	train	-3.5610370635986333	-3.6664808922265717	Ca	Hf	5.54129	5.723981	7.948377000000001	90.0	90.0	90.0	orthorhombic	orthorhombic	0	0
277	CaHfO3	681560	Hf	Ca	-3.406448694	OrthoPerovskite_GdFeO3	-3.3182876000000006	train	-3.3746049404144287	-3.3562185210824897			5.54231	5.69768	8.453395	90.0	90.0	90.0	orthorhombic	other	4	4
278	CaHoO3	693486	Ca	Ho	-3.0521283639999996	OrthoPerovskite_GdFeO3	-3.064085	train	-3.031135082244873	-3.087973067536689			5.878682	6.105041	7.814144000000001	90.0	90.0	90.0	orthorhombic	other	0	0
279	CaInO3	693291	Ca	In	-2.0437766930000003	OrthoPerovskite_GdFeO3	-2.051441	train	-2.1221780776977544	-2.0193878167940396	Ca	In	5.763088	5.989555	7.597571	90.0	90.0	90.0	orthorhombic	orthorhombic	0	0
280	CaIrO3	682736	Ca	Ir	-1.9187238780000002	OrthoPerovskite_GdFeO3	-1.9124435000000002	train	-1.868613004684448	-1.8727117110845297	Ca	Ir	5.312166	5.640368	7.6622710000000005	90.0	90.0	90.0	orthorhombic	orthorhombic	0	0
281	CaIrO3	682737	Ir	Ca	-1.560968942	OrthoPerovskite_GdFeO3	-1.582663	train	-1.5469636917114258	-1.5247132256518043			5.615573	5.6711730000000005	8.113849	90.0	90.0	90.0	orthorhombic	other	5	5
282	CaLuO3	693292	Ca	Lu	-3.111043001	OrthoPerovskite_GdFeO3	-3.1289585	train	-3.044936180114746	-3.156430358809884	Ca	Lu	5.798012	6.0166699999999995	7.745767	90.0	90.0	90.0	orthorhombic	orthorhombic	0	0
283	CaMgO3	693346	Ca	Mg	-2.226913562	OrthoPerovskite_GdFeO3	-2.2347083	test	-2.3534841537475586	-2.2127793084963834			3.838174	7.1262929999999995	8.479187	90.0	90.0	90.0	orthorhombic	other	0	0
284	CaMoO3	681708	Ca	Mo	-2.590010936	OrthoPerovskite_GdFeO3	-2.550684	train	-2.6301984786987305	-2.5462103786583397	Ca	Mo	5.409697	5.619555999999999	7.764344	90.0	90.0	90.0	orthorhombic	orthorhombic	0	0
285	CaMoO3	681709	Mo	Ca	-2.31003843	OrthoPerovskite_GdFeO3	-2.337192	train	-2.408043622970581	-2.320924491069464			5.55305	5.80233	8.205811	90.0	90.0	90.0	orthorhombic	other	4	5
286	CaNbO3	681848	Ca	Nb	-3.005205899	OrthoPerovskite_GdFeO3	-2.9808166000000003	train	-2.9789390563964844	-3.000104691194224	Ca	Nb	5.5163910000000005	5.673888	7.9072070000000005	90.0	90.0	90.0	orthorhombic	orthorhombic	0	0
287	CaOsO3	682960	Ca	Os	-1.994773595	OrthoPerovskite_GdFeO3	-1.9334494999999998	train	-1.9919091463088991	-1.8948781405277493	Ca	Os	5.323619	5.607221	7.684219000000001	90.0	90.0	90.0	orthorhombic	orthorhombic	0	1
288	CaOsO3	682961	Os	Ca	-1.6637113999999997	OrthoPerovskite_GdFeO3	-1.7279833999999998	train	-1.7246263027191162	-1.6780615258165434			5.206444	6.1012830000000005	8.095004	90.0	90.0	90.0	orthorhombic	other	5	5
289	CaPbO3	693100	Ca	Pb	-2.0172234419999997	OrthoPerovskite_GdFeO3	-2.128386	test	-2.0218553543090816	-2.1005834710598954	Ca	Pb	5.674694000000001	5.926178	8.141861	90.0	90.0	90.0	orthorhombic	orthorhombic	0	0
290	CaPdO3	681756	Ca	Pd	-1.7135658390000001	OrthoPerovskite_GdFeO3	-1.7675046000000003	train	-1.6765451431274414	-1.7197659860332148	Ca	Pd	5.347435	5.652889	7.677453	90.0	90.0	90.0	orthorhombic	orthorhombic	0	0
291	CaPtO3	682456	Ca	Pt	-1.796701167	OrthoPerovskite_GdFeO3	-1.8942086999999999	train	-1.770870804786682	-1.8534695703813382	Ca	Pt	5.345117	5.692327	7.699803999999999	90.0	90.0	90.0	orthorhombic	orthorhombic	0	0
292	CaPtO3	682457	Pt	Ca	-1.4377943469999999	OrthoPerovskite_GdFeO3	-1.5116646999999999	train	-1.4676096439361572	-1.449792783514388			5.567729	5.740166	8.117218	90.0	90.0	90.0	orthorhombic	other	4	4
293	CaPuO3	693093	Ca	Pu	-3.343457757	OrthoPerovskite_GdFeO3	-3.3017566	train	-3.321974039077759	-3.3387743029959487	Ca	Pu	5.793862	6.020597	8.399439	90.0	90.0	90.0	orthorhombic	orthorhombic	0	1
294	CaReO3	682340	Re	Ca	-1.9250876719999999	OrthoPerovskite_GdFeO3	-1.7485571	test	-2.0085711479187007	-1.699771773814067			5.213608	6.157489	8.05795	90.0	90.0	90.0	orthorhombic	other	5	5
295	CaReO3	682341	Ca	Re	-2.247767142	OrthoPerovskite_GdFeO3	-2.2430012	test	-2.3543803691864014	-2.2215303311913126	Ca	Re	5.3425769999999995	5.6283389999999995	7.7061720000000005	90.0	90.0	90.0	orthorhombic	orthorhombic	0	0
296	CaRhO3	682032	Ca	Rh	-1.934061139	OrthoPerovskite_GdFeO3	-1.9294269	train	-1.8223422765731807	-1.890633320996268	Ca	Rh	5.346958	5.633069	7.697284	90.0	90.0	90.0	orthorhombic	orthorhombic	0	0
297	CaRhO3	682033	Rh	Ca	-1.616270766	OrthoPerovskite_GdFeO3	-1.6729822	train	-1.584035873413086	-1.6200219076554263			5.574304	5.5821380000000005	8.383977	90.0	90.0	89.99834399999999	tetragonal	other	4	5
298	CaRuO3	681692	Ru	Ca	-1.751566764	OrthoPerovskite_GdFeO3	-1.7863494	train	-1.7995157241821291	-1.7396518248207795			5.522576	5.7386919999999995	8.153595	90.0	90.0	90.0	orthorhombic	other	5	5
299	CaRuO3	681693	Ca	Ru	-2.07284058	OrthoPerovskite_GdFeO3	-2.069436	train	-2.0149064064025883	-2.038376910283078	Ca	Ru	5.371258	5.6103819999999995	7.707969	90.0	90.0	90.0	orthorhombic	orthorhombic	0	1
300	CaSbO3	693091	Ca	Sb	-2.275843335	OrthoPerovskite_GdFeO3	-2.3122401000000004	test	-2.345860004425049	-2.2945941792145526	Ca	Sb	5.612489	5.853565000000001	8.085092999999999	90.0	90.0	90.0	orthorhombic	orthorhombic	0	0
301	CaScO3	681433	Ca	Sc	-3.0593674319999997	OrthoPerovskite_GdFeO3	-3.042887	train	-3.0590834617614746	-3.0656040314833053	Ca	Sc	5.623893	5.8323480000000005	7.651874	90.0	90.0	90.0	orthorhombic	orthorhombic	0	0
302	CaSiO3	682022	Ca	Si	-3.0578390239999997	OrthoPerovskite_GdFeO3	-3.1027422000000002	train	-2.9451303482055664	-3.1287657980076236	Ca	Si	5.055708999999999	5.069196	7.15021	90.0	90.0	90.0	tetragonal	tetragonal	2	0
303	CaSiO3	682023	Si	Ca	-3.1079410610000004	OrthoPerovskite_GdFeO3	-3.0269618	train	-2.94482159614563	-3.0487990794615416			4.921049	5.142917	9.694457	90.0	90.0	90.0	orthorhombic	other	0	3
304	CaSnO3	682296	Ca	Sn	-2.531158701	OrthoPerovskite_GdFeO3	-2.4510171	test	-2.5444927215576167	-2.4410376038952024	Ca	Sn	5.528612	5.70557	7.927213	90.0	90.0	90.0	orthorhombic	orthorhombic	0	0
305	CaSnO3	682297	Sn	Ca	-2.296598606	OrthoPerovskite_GdFeO3	-2.3373307999999997	test	-2.333014249801636	-2.321070958764728			5.618442	5.630844000000001	8.916044	90.0	90.0	90.0	tetragonal	other	4	4
306	CaTaO3	682128	Ca	Ta	-3.097351208	OrthoPerovskite_GdFeO3	-3.0790599999999997	test	-3.118529319763184	-3.1037753278866944	Ca	Ta	5.489136	5.650747	7.881079	90.0	90.0	90.0	orthorhombic	orthorhombic	0	0
307	CaTcO3	681718	Ca	Tc	-2.322250782	OrthoPerovskite_GdFeO3	-2.324861	test	-2.291637897491455	-2.3079122925802538	Ca	Tc	5.370437	5.60079	7.730875999999999	89.984701	90.00248200000001	90.039985	orthorhombic	orthorhombic	0	2
308	CaTeO3	693351	Ca	Te	-2.036762029	OrthoPerovskite_GdFeO3	-2.0667124	train	-2.1789875030517583	-2.0355028510984856	Ca	Te	5.6593279999999995	5.94569	8.166969	90.0	90.0	90.0	orthorhombic	orthorhombic	0	0
309	CaTiO3	681420	Ca	Ti	-3.3672802589999997	OrthoPerovskite_GdFeO3	-3.230267	train	-3.224517345428467	-3.2633354200899207	Ca	Ti	5.355173000000001	5.47802	7.635256	90.0	90.0	90.0	orthorhombic	orthorhombic	0	1
310	CaTiO3	681421	Ti	Ca	-3.20056156	OrthoPerovskite_GdFeO3	-3.200327	train	-3.2045109272003174	-3.231741451817522			5.4198889999999995	5.539864	8.798772999999999	90.0	90.0	90.0	orthorhombic	other	4	4
311	CaTlO3	693418	Ca	Tl	-1.59591941	OrthoPerovskite_GdFeO3	-1.605675	train	-1.642174243927002	-1.5489964720741305	Ca	Tl	5.685877	6.012226999999999	8.109367	90.0	90.0	90.0	orthorhombic	orthorhombic	0	2
312	CaTmO3	693422	Ca	Tm	-3.089485114	OrthoPerovskite_GdFeO3	-3.010216	train	-3.126105308532715	-3.03112819522988			5.840022	6.061187	7.775086	90.0	90.0	90.0	orthorhombic	other	0	1
313	CaVO3	681780	Ca	V	-2.900601475	OrthoPerovskite_GdFeO3	-2.9635978	train	-2.8892192840576167	-2.9819346771364823	Ca	V	5.280422	5.4324959999999995	7.594235	90.0	90.0	90.0	orthorhombic	orthorhombic	0	0
314	CaVO3	681781	V	Ca	-2.726032594	OrthoPerovskite_GdFeO3	-2.6440296	train	-2.785147428512573	-2.6447126473546665			5.508272	5.518098999999999	8.554296	90.0	90.0	90.0	tetragonal	other	4	3
315	CaWO3	682252	Ca	W	-2.567673405	OrthoPerovskite_GdFeO3	-2.578204	train	-2.6895456314086914	-2.575250659448467	Ca	W	5.407677	5.641598999999999	7.783597	90.0	90.0	90.0	orthorhombic	orthorhombic	0	0
316	CaZnO3	682874	Ca	Zn	-1.703299875	OrthoPerovskite_GdFeO3	-1.8122767	train	-1.7584036588668823	-1.7670114204650333	Ca	Zn	5.425804	5.661215	7.588056	90.0	90.0	90.0	orthorhombic	orthorhombic	1	1
317	CaZnO3	682875	Zn	Ca	-1.8043507490000001	OrthoPerovskite_GdFeO3	-1.8685948000000001	train	-1.7987545728683472	-1.8264406878184665			5.80739	5.953937000000001	7.171034	90.0	90.0	90.0	orthorhombic	other	0	0
318	CaZrO3	681658	Ca	Zr	-3.5170447030000003	OrthoPerovskite_GdFeO3	-3.4865522000000007	train	-3.456611156463623	-3.533778522210341	Ca	Zr	5.581783000000001	5.787313	8.025039	90.0	90.0	90.0	orthorhombic	orthorhombic	0	1
319	CaZrO3	681659	Zr	Ca	-3.3582531660000003	OrthoPerovskite_GdFeO3	-3.3405674	train	-3.346705675125122	-3.3797291187550136			5.218697	5.4996220000000005	9.419952	90.0	90.0	90.0	orthorhombic	other	3	2
320	CdAgO3	693482	Cd	Ag	-0.48454484	OrthoPerovskite_GdFeO3	-0.5881824999999999	train	-0.4968904256820679	-0.4752948768034675			5.447905	5.648581	7.866177	90.0	90.0	90.0	orthorhombic	other	0	0
321	CdAsO3	693200	Cd	As	-1.228098489	OrthoPerovskite_GdFeO3	-1.271136	train	-1.1684962511062622	-1.1959766139619064	Cd	As	5.377949	5.520045	7.721986	90.0	90.0	90.0	orthorhombic	orthorhombic	0	1
322	CdAuO3	693448	Cd	Au	-0.5488695229999999	OrthoPerovskite_GdFeO3	-0.74544954	train	-0.5221617221832275	-0.6412497823496953			5.453536	5.631304	8.035233999999999	90.0	90.0	90.0	orthorhombic	other	0	0
323	CdBiO3	693272	Cd	Bi	-1.258116526	OrthoPerovskite_GdFeO3	-1.2828879	train	-1.1120245456695557	-1.2083777213680653			5.757647	5.912758999999999	8.32113	90.0	90.0	90.0	orthorhombic	other	0	1
324	CdCoO3	682514	Co	Cd	-0.818916069	OrthoPerovskite_GdFeO3	-0.7409953	test	-0.9996653199195862	-0.6365494778327397			5.346178	5.52501	8.236627	90.0	90.0	90.0	orthorhombic	other	3	4
325	CdCoO3	682515	Cd	Co	-0.9635156309999999	OrthoPerovskite_GdFeO3	-1.0217419	test	-1.072650671005249	-0.9328052952336688	Cd	Co	5.223488	5.258193	7.379669	90.0	90.0	90.0	orthorhombic	orthorhombic	1	0
326	CdCuO3	693065	Cd	Cu	-0.668881363	OrthoPerovskite_GdFeO3	-0.78494674	train	-0.7378624677658081	-0.6829289167400956	Cd	Cu	5.2128440000000005	5.354515	7.446511	90.0	90.0	90.0	orthorhombic	orthorhombic	0	0
327	CdFeO3	681575	Fe	Cd	-1.135875171	OrthoPerovskite_GdFeO3	-1.1185694	train	-1.22688627243042	-1.0349818137004585			5.404198	5.444369	8.271649	90.0	90.0	90.0	orthorhombic	other	4	1
328	CdFeO3	681576	Cd	Fe	-1.283265182	OrthoPerovskite_GdFeO3	-1.1087312	train	-1.282226324081421	-1.0246001243665404	Cd	Fe	5.271976	5.348364	7.51766	90.0	90.0	90.0	orthorhombic	orthorhombic	0	3
329	CdGaO3	682536	Ga	Cd	-1.3638846009999999	OrthoPerovskite_GdFeO3	-1.4479905	train	-1.4350004196166992	-1.3826010448847832			5.318429	5.555581	8.320789	90.0	90.0	90.0	orthorhombic	other	0	0
330	CdGaO3	682537	Cd	Ga	-1.355702669	OrthoPerovskite_GdFeO3	-1.3381511000000001	train	-1.3868392705917358	-1.2666938131326355	Cd	Ga	5.2774980000000005	5.5027	7.581497	90.0	90.0	90.0	orthorhombic	orthorhombic	1	2
331	CdGeO3	681964	Ge	Cd	-1.5190628130000001	OrthoPerovskite_GdFeO3	-1.577841	train	-1.584646701812744	-1.5196248450569647			5.348058	5.362958	8.532001	90.0	90.0	90.0	tetragonal	other	2	2
332	CdGeO3	681965	Cd	Ge	-1.587775902	OrthoPerovskite_GdFeO3	-1.6326352	train	-1.4954386949539185	-1.5774460279664992	Cd	Ge	5.258661	5.320337	7.501342	90.0	90.0	90.0	orthorhombic	orthorhombic	0	0
333	CdIrO3	693414	Cd	Ir	-1.003603695	OrthoPerovskite_GdFeO3	-0.9962892	test	-0.9571605324745178	-0.9059465178039131	Cd	Ir	5.417406	5.442997	7.746685	90.0	90.0	90.0	tetragonal	tetragonal	0	0
334	CdMoO3	681906	Mo	Cd	-1.430060246	OrthoPerovskite_GdFeO3	-1.5537376	train	-1.4973707199096682	-1.4941899066849895			5.5782050000000005	5.697687999999999	8.00509	90.0	90.0	90.0	orthorhombic	other	3	3
335	CdMoO3	681907	Cd	Mo	-1.660790185	OrthoPerovskite_GdFeO3	-1.6507161	train	-1.7066195011138916	-1.5965257668087307	Cd	Mo	5.46203	5.510186	7.7456320000000005	90.0	90.0	90.0	orthorhombic	orthorhombic	1	1
336	CdNiO3	682769	Ni	Cd	-0.610553283	OrthoPerovskite_GdFeO3	-0.6289357	train	-0.8003865480422974	-0.5182993961020219			5.484837000000001	5.588116	7.504878	90.0	90.0	90.0	orthorhombic	other	4	5
337	CdNiO3	682770	Cd	Ni	-0.799122252	OrthoPerovskite_GdFeO3	-0.74542767	train	-0.8440401554107666	-0.6412267041905063	Cd	Ni	5.205925	5.372375	7.368889	90.0	90.0	90.0	orthorhombic	orthorhombic	0	0
338	CdOsO3	693203	Cd	Os	-1.072624216	OrthoPerovskite_GdFeO3	-1.0587757	train	-1.0793132781982422	-0.9718849446059586	Cd	Os	5.366404	5.496981	7.682386999999999	90.0	90.0	90.0	orthorhombic	orthorhombic	1	1
339	CdPbO3	693365	Cd	Pb	-1.177158683	OrthoPerovskite_GdFeO3	-1.343701	train	-1.0233454704284668	-1.272550304933403	Cd	Pb	5.656993	5.832330000000001	8.190025	90.0	90.0	90.0	orthorhombic	orthorhombic	0	1
340	CdPdO3	693249	Cd	Pd	-0.827024345	OrthoPerovskite_GdFeO3	-0.9292924000000001	train	-0.7758224010467529	-0.8352486295757154	Cd	Pd	5.374408	5.560718	7.669117999999999	90.0	90.0	90.0	orthorhombic	orthorhombic	0	0
341	CdPtO3	693526	Cd	Pt	-0.902787908	OrthoPerovskite_GdFeO3	-0.952133	train	-0.8655359745025635	-0.8593510073887597	Cd	Pt	5.418189	5.557684	7.716857000000001	90.0	90.0	90.0	orthorhombic	orthorhombic	0	1
342	CdReO3	681774	Re	Cd	-1.026405084	OrthoPerovskite_GdFeO3	-1.1070806	train	-1.1032774448394775	-1.0228583406647893			5.3019	5.8885629999999995	8.241493	90.0	90.0	90.0	orthorhombic	other	5	5
343	CdReO3	681775	Cd	Re	-1.324712939	OrthoPerovskite_GdFeO3	-1.2568296	train	-1.4238665103912354	-1.1808798889220853	Cd	Re	5.375755000000001	5.549114	7.677733	90.0	90.0	90.0	orthorhombic	orthorhombic	1	2
344	CdRhO3	693352	Cd	Rh	-1.0208367870000001	OrthoPerovskite_GdFeO3	-1.0444558000000002	train	-0.9646183848381042	-0.9567739737888604	Cd	Rh	5.385135	5.4507010000000005	7.682989999999999	90.0	90.0	90.0	orthorhombic	orthorhombic	0	1
345	CdRuO3	693107	Cd	Ru	-1.152006222	OrthoPerovskite_GdFeO3	-1.2336236	train	-1.140559196472168	-1.156391925404073	Cd	Ru	5.402655	5.454524	7.676075999999999	90.0	90.0	90.0	orthorhombic	orthorhombic	0	1
346	CdSbO3	693127	Cd	Sb	-1.424585833	OrthoPerovskite_GdFeO3	-1.5123726999999998	test	-1.387318134307861	-1.4505398953893665	Cd	Sb	5.600447	5.7670900000000005	8.095136	90.0	90.0	90.0	orthorhombic	orthorhombic	0	1
347	CdSiO3	693231	Cd	Si	-2.084303596	OrthoPerovskite_GdFeO3	-2.0749223000000003	test	-2.0399184226989746	-2.0441662886442296	Cd	Si	5.071983	5.0936069999999996	7.190849000000001	90.0	90.0	90.0	tetragonal	tetragonal	1	2
348	CdSnO3	693163	Cd	Sn	-1.674394561	OrthoPerovskite_GdFeO3	-1.7641016999999999	train	-1.5101079940795898	-1.7161751004408914	Cd	Sn	5.504008	5.635905999999999	7.954375	90.0	90.0	90.0	orthorhombic	orthorhombic	0	0
349	CdTcO3	681766	Tc	Cd	-1.120623264	OrthoPerovskite_GdFeO3	-1.1874597	test	-1.1774865388870241	-1.1076778040971196			5.571794000000001	5.6707019999999995	7.833029	90.0	90.0	90.0	orthorhombic	other	4	3
350	CdTcO3	681767	Cd	Tc	-1.3971375369999999	OrthoPerovskite_GdFeO3	-1.4675066	test	-1.3627336025238037	-1.4031952681379884	Cd	Tc	5.421259	5.457754	7.76669	90.0	90.0	90.0	orthorhombic	orthorhombic	0	0
351	CdTeO3	693247	Cd	Te	-1.179615424	OrthoPerovskite_GdFeO3	-1.1818271999999999	test	-1.2107939720153809	-1.1017341492442707	Cd	Te	5.674726000000001	5.843909	8.207805	90.0	90.0	90.0	orthorhombic	orthorhombic	0	0
352	CdWO3	681966	W	Cd	-1.407729326	OrthoPerovskite_GdFeO3	-1.4951111000000001	train	-1.40181565284729	-1.432324716941443			5.4496269999999996	6.368515	7.080703	90.0	90.0	90.0	orthorhombic	other	5	5
353	CdWO3	681967	Cd	W	-1.673064968	OrthoPerovskite_GdFeO3	-1.6477206999999998	train	-1.7711838483810425	-1.593364892641625	Cd	W	5.471639	5.596622	7.781664999999999	90.0	90.0	90.0	orthorhombic	orthorhombic	3	2
354	CeAgO3	681463	Ce	Ag	-1.876927349	OrthoPerovskite_GdFeO3	-1.9687092000000002	test	-1.9714297056198118	-1.932085683717272	Ce	Ag	5.635121	6.027302	8.062339	90.0	90.0	90.0	orthorhombic	orthorhombic	0	0
355	CeAgO3	681464	Ag	Ce	-1.596978965	OrthoPerovskite_GdFeO3	-1.7536964	test	-1.7450759410858154	-1.7051949829370574			5.961641	6.115318	8.300074	90.0	90.0	90.0	orthorhombic	other	4	2
356	CeAlO3	681924	Al	Ce	-3.190054996	OrthoPerovskite_GdFeO3	-3.0869637	train	-3.339688539505005	-3.112115650098938			5.5572550000000005	5.574335	8.78552	90.0	90.0	90.0	tetragonal	other	4	5
357	CeAlO3	681925	Ce	Al	-3.4786470030000003	OrthoPerovskite_GdFeO3	-3.4987211000000005	train	-3.451941967010498	-3.546619665847949	Ce	Al	5.349009	5.35906021	5.35906021	60.28241324	60.062023499999995	60.062023499999995	rhombohedral	rhombohedral	1	2
358	CeAsO3	693451	Ce	As	-2.328032625	OrthoPerovskite_GdFeO3	-2.3721902000000004	train	-2.376193761825561	-2.3578560882769146	Ce	As	5.631848000000001	5.989982	8.112963	90.0	90.0	90.0	orthorhombic	orthorhombic	0	1
359	CeAuO3	693186	Ce	Au	-1.918165444	OrthoPerovskite_GdFeO3	-1.9712341	train	-1.9234460592269895	-1.9347500661652002	Ce	Au	5.755625	6.583713	7.475608	90.0	90.0	90.0	orthorhombic	orthorhombic	0	0
360	CeBeO3	681676	Be	Ce	-2.17320919	OrthoPerovskite_GdFeO3	-2.0964415	train	-2.4313745498657227	-2.0668742686725325			5.256557	5.5760510000000005	8.451555	90.0	90.0	90.0	orthorhombic	other	4	4
361	CeCdO3	693320	Ce	Cd	-2.149794883	OrthoPerovskite_GdFeO3	-2.1858932999999996	train	-2.215860605239868	-2.161267633105029	Ce	Cd	5.714005	6.128639	8.207089	90.0	90.0	90.0	orthorhombic	orthorhombic	0	0
362	CeCoO3	681630	Co	Ce	-2.281325392	OrthoPerovskite_GdFeO3	-2.3385243	train	-2.554132461547852	-2.322330391000303			5.549342	6.416387	8.943239	90.0	90.0	90.0	orthorhombic	other	4	3
363	CeCoO3	681631	Ce	Co	-2.422761714	OrthoPerovskite_GdFeO3	-2.4122026	train	-2.41698956489563	-2.4000788837379208	Ce	Co	5.39774	5.474648999999999	7.724905000000001	90.0	90.0	90.0	orthorhombic	orthorhombic	0	0
364	CeCrO3	682196	Cr	Ce	-2.683094428	OrthoPerovskite_GdFeO3	-2.6680074	train	-2.817664384841919	-2.670015047235826			5.774181	5.787019	8.467333	90.0	90.0	90.0	tetragonal	other	5	5
365	CeCrO3	682197	Ce	Cr	-3.08218691	OrthoPerovskite_GdFeO3	-3.0823658	train	-2.9785344600677486	-3.107263749406898	Ce	Cr	5.511119	5.596541	7.825286	90.0	90.0	90.0	orthorhombic	orthorhombic	0	0
366	CeCuO3	682416	Cu	Ce	-1.8511459330000002	OrthoPerovskite_GdFeO3	-1.9039143	train	-2.05103063583374	-1.8637113345251124			5.689422	5.846678	8.330827000000001	90.0	90.0	90.0	orthorhombic	other	5	5
367	CeCuO3	682417	Ce	Cu	-2.156255835	OrthoPerovskite_GdFeO3	-2.2205646	train	-2.1717312335968018	-2.1978542714538207	Ce	Cu	5.406911	5.475562	7.708488000000001	90.0	90.0	90.0	orthorhombic	orthorhombic	0	2
368	CeDyO3	693574	Ce	Dy	-3.64975264	OrthoPerovskite_GdFeO3	-3.6112553999999997	train	-3.607661247253418	-3.6653706713174405	Ce	Dy	5.856201	6.095497	8.487632000000001	90.0	90.0	90.0	orthorhombic	orthorhombic	0	0
369	CeErO3	693375	Ce	Er	-3.6859971419999997	OrthoPerovskite_GdFeO3	-3.5289202000000004	test	-3.66952395439148	-3.5784870475197925	Ce	Er	5.814733	6.057016	8.41113	90.0	90.0	90.0	orthorhombic	orthorhombic	0	1
370	CeFeO3	682410	Fe	Ce	-2.4626997040000003	OrthoPerovskite_GdFeO3	-2.4783702	train	-2.6144964694976807	-2.469901764668474			5.697037	5.723292	8.763686	90.0	90.0	90.0	tetragonal	other	4	4
371	CeFeO3	682411	Ce	Fe	-2.668945622	OrthoPerovskite_GdFeO3	-2.730729	train	-2.754954099655152	-2.7362015616110464	Ce	Fe	5.5179730000000005	5.641536	7.847316	90.0	90.0	90.0	orthorhombic	orthorhombic	0	0
372	CeGaO3	682088	Ga	Ce	-2.655928689	OrthoPerovskite_GdFeO3	-2.6962900000000003	train	-2.8574068546295166	-2.699860056155698			5.662006	5.72381	8.743335	90.0	90.0	90.0	orthorhombic	other	4	4
373	CeGaO3	682089	Ce	Ga	-2.853132977	OrthoPerovskite_GdFeO3	-2.8551352000000003	train	-2.9633889198303223	-2.8674803036180503	Ce	Ga	5.506599	5.54512	7.802321000000001	90.0	90.0	90.0	orthorhombic	orthorhombic	0	0
374	CeGeO3	682138	Ge	Ce	-2.466421523	OrthoPerovskite_GdFeO3	-2.525187	test	-2.6270711421966557	-2.5193048539742597			5.773606	6.139094999999999	8.58855	90.0	90.0	90.0	orthorhombic	other	1	1
375	CeGeO3	682139	Ce	Ge	-2.479191104	OrthoPerovskite_GdFeO3	-2.4720445	test	-2.5701234340667725	-2.4632266155335136	Ce	Ge	5.575482	5.848471	8.015168	90.0	90.0	90.0	orthorhombic	orthorhombic	0	2
376	CeHfO3	682418	Hf	Ce	-3.1897511410000003	OrthoPerovskite_GdFeO3	-3.1943588	train	-3.3122878074646	-3.225443551969715			6.053212	6.259464	7.644830000000001	90.0	90.0	90.0	orthorhombic	other	4	4
377	CeHfO3	682419	Ce	Hf	-3.397738557	OrthoPerovskite_GdFeO3	-3.3914456	train	-3.439061164855957	-3.4334179710114183	Ce	Hf	4.2750285	5.612689	5.613126	90.0	90.0	90.0	tetragonal	tetragonal	0	0
378	CeHgO3	693541	Ce	Hg	-1.862902935	OrthoPerovskite_GdFeO3	-1.9415698000000001	test	-1.8380439281463623	-1.9034470283220837	Ce	Hg	5.722886	6.499671	8.10174	90.0	90.0	90.0	orthorhombic	orthorhombic	0	0
379	CeHoO3	693468	Ce	Ho	-3.668951537	OrthoPerovskite_GdFeO3	-3.6704538	train	-3.671302318572998	-3.727839354396157	Ce	Ho	5.836062999999999	6.075604	8.456187	90.0	90.0	90.0	orthorhombic	orthorhombic	0	0
380	CeInO3	693068	Ce	In	-2.686366824	OrthoPerovskite_GdFeO3	-2.6697523999999997	train	-2.719015598297119	-2.6718564458542406	Ce	In	5.71255	5.984691000000001	8.248669999999999	90.0	90.0	90.0	orthorhombic	orthorhombic	0	0
381	CeIrO3	693275	Ce	Ir	-2.152032906	OrthoPerovskite_GdFeO3	-2.1895938	train	-2.0421833992004395	-2.1651725589431057	Ce	Ir	5.44315	5.938287	7.906027000000001	90.0	90.0	90.0	orthorhombic	orthorhombic	0	1
382	CeLuO3	693161	Ce	Lu	-3.7361809939999997	OrthoPerovskite_GdFeO3	-3.5400817000000004	test	-3.70786714553833	-3.590265139599698	Ce	Lu	5.7665	5.99401	8.317829	90.0	90.0	90.0	orthorhombic	orthorhombic	0	1
383	CeMgO3	682102	Mg	Ce	-2.7111069089999997	OrthoPerovskite_GdFeO3	-2.7113435000000004	train	-2.7847249507904053	-2.7157451530624632			5.673706	5.945683	8.547678	90.0	90.0	90.0	orthorhombic	other	4	4
384	CeMgO3	682103	Ce	Mg	-2.825160617	OrthoPerovskite_GdFeO3	-2.8304652999999997	train	-2.878390073776245	-2.8414475702218156	Ce	Mg	5.453403	5.793273999999999	7.840198	90.0	90.0	90.0	orthorhombic	orthorhombic	0	0
385	CeMnO3	682130	Mn	Ce	-2.52879937	OrthoPerovskite_GdFeO3	-2.4897242000000004	test	-2.7038722038269043	-2.4818829909799245			5.784404	5.808389	8.475488	90.0	90.0	90.0	tetragonal	other	4	4
386	CeMnO3	682131	Ce	Mn	-2.848195112	OrthoPerovskite_GdFeO3	-2.7330162999999996	test	-2.878401279449463	-2.7386152183788965	Ce	Mn	5.502833	5.683323000000001	7.816105	90.0	90.0	90.0	orthorhombic	orthorhombic	0	0
387	CeMoO3	682360	Mo	Ce	-2.309430774	OrthoPerovskite_GdFeO3	-2.3822482000000003	train	-2.530679941177368	-2.36846971996976			5.297625	6.531176	8.21841	90.0	90.0	90.0	orthorhombic	other	5	4
388	CeMoO3	682361	Ce	Mo	-2.575099786	OrthoPerovskite_GdFeO3	-2.7694962000000003	train	-2.544802188873291	-2.77711036878572	Ce	Mo	5.559144	5.94116	8.009347	90.0	90.0	90.0	orthorhombic	orthorhombic	0	0
389	CeNbO3	693058	Ce	Nb	-2.893088655	OrthoPerovskite_GdFeO3	-2.819914	train	-2.8645448684692383	-2.830313387274836	Ce	Nb	5.583311	6.036638	7.968224	90.0	90.0	90.0	orthorhombic	orthorhombic	0	1
390	CeNiO3	681434	Ni	Ce	-2.0112387380000003	OrthoPerovskite_GdFeO3	-2.0574615	train	-2.128595352172852	-2.0257409058382607			5.591093	5.897083	8.485464	90.0	90.0	90.0	orthorhombic	other	4	4
391	CeNiO3	681435	Ce	Ni	-2.293924061	OrthoPerovskite_GdFeO3	-2.2855997	train	-2.232391357421875	-2.266482089957237	Ce	Ni	5.386733	5.473289	7.6730410000000004	90.0	90.0	90.0	orthorhombic	orthorhombic	0	2
392	CeOsO3	693278	Ce	Os	-2.0998708219999997	OrthoPerovskite_GdFeO3	-2.2090914	train	-2.100470781326294	-2.1857472602052277	Ce	Os	5.342226	6.053237	7.826962	90.0	90.0	90.0	orthorhombic	orthorhombic	0	0
393	CePdO3	681535	Pd	Ce	-1.756081784	OrthoPerovskite_GdFeO3	-1.8161254	train	-1.7788958549499512	-1.77107273328033			5.847362	6.056177	8.219799	90.0	90.0	90.0	orthorhombic	other	4	4
394	CePdO3	681536	Ce	Pd	-2.106650503	OrthoPerovskite_GdFeO3	-2.1514924	train	-2.1120376586914062	-2.124966332398885	Ce	Pd	5.589091000000001	5.948491000000001	7.858889	90.0	90.0	90.0	orthorhombic	orthorhombic	0	0
395	CePtO3	693155	Ce	Pt	-2.037174747	OrthoPerovskite_GdFeO3	-2.1148312000000002	train	-2.067358493804932	-2.0862798664794444	Ce	Pt	5.634135	6.128340000000001	7.689749000000001	90.0	90.0	90.0	orthorhombic	orthorhombic	0	0
396	CeReO3	693366	Ce	Re	-2.238108986	OrthoPerovskite_GdFeO3	-2.2320778	train	-2.2134969234466557	-2.210003492412865	Ce	Re	5.381519	6.050731	7.854049000000001	90.0	90.0	90.0	orthorhombic	orthorhombic	0	1
397	CeRhO3	681386	Rh	Ce	-1.895266064	OrthoPerovskite_GdFeO3	-1.9736328	train	-1.8475203514099119	-1.9372812769766568			5.603829	5.940866000000001	8.537452	90.0	90.0	90.0	orthorhombic	other	4	3
398	CeRhO3	681387	Ce	Rh	-2.2883736530000003	OrthoPerovskite_GdFeO3	-2.3171935	train	-2.2118570804595947	-2.2998212187082228	Ce	Rh	5.469258	5.851529	7.893492999999999	90.0	90.0	90.0	orthorhombic	orthorhombic	0	0
399	CeRuO3	682316	Ru	Ce	-1.9150351209999998	OrthoPerovskite_GdFeO3	-1.9781127	train	-1.936018705368042	-1.9420086590228665			5.796538	5.899558	8.317763000000001	90.0	90.0	90.0	orthorhombic	other	4	4
400	CeRuO3	682317	Ce	Ru	-2.293553476	OrthoPerovskite_GdFeO3	-2.3693833	train	-2.255356311798096	-2.354894127370308	Ce	Ru	5.429558999999999	5.899508	7.867392	90.0	90.0	90.0	orthorhombic	orthorhombic	0	0
401	CeScO3	682012	Sc	Ce	-3.447842337	OrthoPerovskite_GdFeO3	-3.3004339999999996	train	-3.490630626678467	-3.3373786389198936			5.849973	5.950997	8.579454	90.0	90.0	90.0	orthorhombic	other	3	4
402	CeSiO3	693438	Ce	Si	-2.665472937	OrthoPerovskite_GdFeO3	-2.692381	train	-3.0504727363586426	-2.6957351122018967	Ce	Si	3.8021825	3.8148571100000006	3.81485718	90.09129055	90.00001345000003	89.99998655000002	cubic	cubic	2	2
403	CeSnO3	693333	Ce	Sn	-2.508523105	OrthoPerovskite_GdFeO3	-2.5524085	train	-2.6233065128326416	-2.5480301448001486	Ce	Sn	5.800549	6.124855999999999	8.446589	90.0	90.0	90.0	orthorhombic	orthorhombic	0	0
404	CeTaO3	693141	Ce	Ta	-2.89205188	OrthoPerovskite_GdFeO3	-2.8716082999999997	train	-2.912890911102295	-2.8848634231487122	Ce	Ta	5.56016	6.017032	7.9318919999999995	90.0	90.0	90.0	orthorhombic	orthorhombic	0	1
405	CeTcO3	681764	Ce	Tc	-2.426077331	OrthoPerovskite_GdFeO3	-2.4879990000000003	train	-2.3965883255004883	-2.480062486168183	Ce	Tc	5.477921	5.903443	7.91833	90.0	90.0	90.0	orthorhombic	orthorhombic	0	0
406	CeTcO3	681765	Tc	Ce	-2.0981179930000002	OrthoPerovskite_GdFeO3	-2.1550977000000002	train	-2.259169340133667	-2.128770799126089			5.349073000000001	6.3651089999999995	8.294763	90.0	90.0	90.0	orthorhombic	other	5	4
407	CeTiO3	681362	Ce	Ti	-3.3629172389999997	OrthoPerovskite_GdFeO3	-3.212815	train	-3.3612170219421387	-3.2449193234202514	Ce	Ti	5.533883	5.65991	7.884016	90.0	90.0	90.0	orthorhombic	orthorhombic	0	1
408	CeTiO3	681363	Ti	Ce	-3.07301761	OrthoPerovskite_GdFeO3	-3.1062832	train	-3.3028719425201416	-3.132502412625277			5.764571	5.881254	8.400367999999999	90.0	90.0	90.0	orthorhombic	other	5	4
409	CeTmO3	693280	Ce	Tm	-3.711008375	OrthoPerovskite_GdFeO3	-3.5816797999999994	train	-3.794025421142578	-3.634161233507248	Ce	Tm	5.797848	6.030086	8.380737	90.0	90.0	90.0	orthorhombic	orthorhombic	0	1
410	CeVO3	682159	V	Ce	-2.861027439	OrthoPerovskite_GdFeO3	-2.8652167	train	-2.9071080684661865	-2.8781187335157847			5.737671	5.882834	8.542441	90.0	90.0	90.0	orthorhombic	other	3	3
411	CeWO3	693337	Ce	W	-2.448826368	OrthoPerovskite_GdFeO3	-2.4687471000000003	train	-2.4815478324890137	-2.459747058052505	Ce	W	5.40521	6.058575	7.889427	90.0	90.0	90.0	orthorhombic	orthorhombic	0	1
412	CeZnO3	681914	Zn	Ce	-2.228149674	OrthoPerovskite_GdFeO3	-2.1966088	train	-2.153846740722656	-2.172575086913409			5.5147639999999996	5.978397	8.696947999999999	90.0	90.0	90.0	orthorhombic	other	4	4
413	CeZnO3	681915	Ce	Zn	-2.3416987430000002	OrthoPerovskite_GdFeO3	-2.3541539	train	-2.407842874526977	-2.3388234132618355	Ce	Zn	5.484164	5.699513	7.824485000000001	90.0	90.0	90.0	orthorhombic	orthorhombic	0	1
414	CeZrO3	682016	Zr	Ce	-3.1183494510000003	OrthoPerovskite_GdFeO3	-3.1753628	train	-3.2567138671875	-3.2053981604766464			6.080112000000001	6.209688	7.891575	90.0	90.0	90.0	orthorhombic	other	4	2
415	CeZrO3	682017	Ce	Zr	-3.304632316	OrthoPerovskite_GdFeO3	-3.1554928	train	-3.3784475326538086	-3.1844304868102284	Ce	Zr	5.74554	6.040726	8.174	90.0	90.0	90.0	orthorhombic	orthorhombic	0	4
416	CoAgO3	693452	Ag	Co	-0.481104479	OrthoPerovskite_GdFeO3	-0.49160695	test	-0.6552473306655884	-0.3733842267503795	Ag	Co	5.208343	5.302154	7.348099	90.0	90.0	90.0	orthorhombic	orthorhombic	0	0
417	CoBiO3	681597	Co	Bi	-0.9539504409999999	OrthoPerovskite_GdFeO3	-1.0	train	-1.0867284536361694	-0.9098623126424307			5.597595	5.621066000000001	8.156142	90.0	90.0	90.0	tetragonal	other	4	4
418	CoBiO3	681598	Bi	Co	-1.249353884	OrthoPerovskite_GdFeO3	-1.2399788999999999	train	-1.1969656944274902	-1.1630983097247667	Bi	Co	5.368837999999999	5.574466	7.6116	90.0	90.0	90.0	orthorhombic	orthorhombic	0	0
419	CoHgO3	693327	Hg	Co	-0.5669820179999999	OrthoPerovskite_GdFeO3	-0.75215966	train	-0.6316943168640137	-0.6483305879069428			5.328714	5.427475	7.420126	90.0	90.0	90.0	orthorhombic	other	1	0
420	CoMoO3	693534	Co	Mo	-1.66597016	OrthoPerovskite_GdFeO3	-1.7720398000000002	train	-1.624298334121704	-1.7245517230041225			5.248872	5.250223	7.671734	90.0	90.0	90.0	tetragonal	other	0	0
421	CoPbO3	681382	Pb	Co	-1.077103549	OrthoPerovskite_GdFeO3	-1.1372652	train	-1.05328106880188	-1.0547104213165945	Pb	Co	5.345483	5.60003	7.654869000000001	90.0	90.0	90.0	orthorhombic	orthorhombic	0	1
422	CrAgO3	693057	Ag	Cr	-1.236299896	OrthoPerovskite_GdFeO3	-1.164855	train	-1.203074932098389	-1.0838243580514584	Ag	Cr	3.6450385	5.356592	5.400769	89.998473	90.0	90.0	orthorhombic	orthorhombic	0	0
423	CrBiO3	682284	Cr	Bi	-1.6418444030000001	OrthoPerovskite_GdFeO3	-1.6998669999999998	train	-1.615492582321167	-1.6483918982435952			5.657269	5.747884	8.315946	90.0	90.0	90.0	orthorhombic	other	5	5
424	CrBiO3	682285	Bi	Cr	-1.962072297	OrthoPerovskite_GdFeO3	-1.9836459	train	-1.68542218208313	-1.947847528269521	Bi	Cr	5.429709	5.646679	7.780815	90.0	90.0	90.0	orthorhombic	orthorhombic	0	0
425	CrCdO3	693105	Cd	Cr	-1.6844770569999998	OrthoPerovskite_GdFeO3	-1.6898712	test	-1.6486468315124512	-1.6378439026505012	Cd	Cr	5.255061	5.359121	7.513653999999999	90.0	90.0	90.0	orthorhombic	orthorhombic	0	0
426	CrHgO3	693080	Hg	Cr	-1.2982151370000001	OrthoPerovskite_GdFeO3	-1.5979711	test	-1.340243935585022	-1.5408669873655891			5.426195	5.477787	7.542584	90.0	90.0	90.0	orthorhombic	other	0	0
427	CrMoO3	693281	Cr	Mo	-1.951635176	OrthoPerovskite_GdFeO3	-1.9322691000000003	train	-1.9335776567459104	-1.8936325319723477	Cr	Mo	5.227441000000001	5.434902	7.678864	90.0	90.0	90.0	orthorhombic	orthorhombic	0	1
428	CrPbO3	681984	Pb	Cr	-1.789550508	OrthoPerovskite_GdFeO3	-1.7983346000000002	test	-1.6475924253463743	-1.7522991203631428	Pb	Cr	5.425146	5.554229	7.723857000000001	90.0	90.0	90.0	orthorhombic	orthorhombic	0	1
429	CrPbO3	681985	Cr	Pb	-1.505748375	OrthoPerovskite_GdFeO3	-1.6076952	test	-1.5427201986312866	-1.5511282735004464			5.596915	5.687224	8.242164	90.0	90.0	90.0	orthorhombic	other	4	3
430	CrSbO3	693338	Sb	Cr	-1.8914975969999999	OrthoPerovskite_GdFeO3	-1.8867026999999998	test	-1.7596276998519895	-1.845548918215252	Sb	Cr	5.272053	5.679467	7.646861	90.0	90.0	90.0	orthorhombic	orthorhombic	0	0
431	CrSnO3	693379	Sn	Cr	-1.9394047769999998	OrthoPerovskite_GdFeO3	-2.015432	train	-1.8931822776794436	-1.9813895802034986	Sn	Cr	5.2948059999999995	5.543332	7.683812	90.0	90.0	90.0	orthorhombic	orthorhombic	0	0
432	CrWO3	693108	Cr	W	-1.9478528769999999	OrthoPerovskite_GdFeO3	-1.9780578999999998	test	-1.999936819076538	-1.9419508317195486	Cr	W	5.390301	5.397328	7.643871000000001	90.0	90.0	90.0	tetragonal	tetragonal	0	0
433	CsAuO3	693388	Cs	Au	-0.295537498	OrthoPerovskite_GdFeO3	-0.5992803000000001	test	-0.3102400302886963	-0.48700574991948054	Cs	Au	4.3310995000000005	5.864977	5.880294999999999	90.0	90.0	90.0	tetragonal	tetragonal	1	2
434	CsBiO3	682936	Cs	Bi	-1.21853441	OrthoPerovskite_GdFeO3	-1.2636128999999998	train	-1.1427457332611084	-1.188037917144602	Cs	Bi	4.36182247	4.36182247	4.3676115	90.0	90.0	89.93506498	cubic	cubic	1	3
435	CsBiO3	682937	Bi	Cs	-1.214052225	OrthoPerovskite_GdFeO3	-1.2055053999999998	train	-1.0961751937866209	-1.1267203983941543			5.40599	6.018986	13.141661	90.0	90.0	90.0	orthorhombic	other	4	4
436	CsCeO3	693184	Cs	Ce	-1.9388721519999998	OrthoPerovskite_GdFeO3	-1.9985330000000001	test	-2.001975774765014	-1.9635570327808112	Cs	Ce	4.6787555	6.568385	6.693364	90.0	90.0	90.0	orthorhombic	orthorhombic	3	3
437	CsGeO3	682608	Cs	Ge	-1.3299579240000001	OrthoPerovskite_GdFeO3	-1.3653743	test	-1.283681869506836	-1.295420897871218			3.811029	6.586438	6.588694	90.0	90.0	90.0	tetragonal	other	2	3
438	CsGeO3	682609	Ge	Cs	-1.5470541580000001	OrthoPerovskite_GdFeO3	-1.6091421000000001	test	-1.48616361618042	-1.552655104251727			5.681853	6.7419	9.535664	90.0	90.0	90.0	orthorhombic	other	0	0
439	CsHoO3	682479	Ho	Cs	-1.949041749	OrthoPerovskite_GdFeO3	-2.0337808	test	-2.140038251876831	-2.000752018581474			5.1109599999999995	6.031605	11.809817	90.0	90.0	90.0	orthorhombic	other	3	3
440	CsInO3	682578	Cs	In	-0.9821469209999999	OrthoPerovskite_GdFeO3	-1.0865161	train	-0.9953582882881165	-1.0011578009006699	Cs	In	4.342426000000001	4.3429644	4.34278347	89.90260627999999	90.0	90.0	cubic	cubic	0	0
441	CsInO3	682579	In	Cs	-0.8893640340000001	OrthoPerovskite_GdFeO3	-0.9505442	train	-0.682292103767395	-0.8576744376896551			4.858676	5.957361	11.895375999999999	90.0	90.0	90.0	orthorhombic	other	4	4
442	CsIrO3	681523	Cs	Ir	-0.883186041	OrthoPerovskite_GdFeO3	-0.9228681999999999	train	-0.8662999868392944	-0.8284695390287699	Cs	Ir	4.0525515	4.06323289	4.06323289	89.98428581	90.0	90.0	cubic	cubic	5	5
443	CsIrO3	681524	Ir	Cs	-1.156064883	OrthoPerovskite_GdFeO3	-1.2011353	train	-0.925472855567932	-1.122108882003132			6.002045	7.098085	10.683869	90.0	90.0	90.0	orthorhombic	other	1	0
444	CsMoO3	682100	Cs	Mo	-1.9491117230000001	OrthoPerovskite_GdFeO3	-1.9963958	test	-1.864235758781433	-1.9613017679514262			5.7483629999999994	5.748441000000001	8.125592999999999	90.000005	90.0	90.0	tetragonal	other	2	2
445	CsMoO3	682101	Mo	Cs	-2.114153529	OrthoPerovskite_GdFeO3	-2.3133318	test	-2.040854215621948	-2.2957461877370293			5.559723	6.549202999999999	11.386624000000001	90.0	90.0	90.0	orthorhombic	other	0	0
446	CsNbO3	682180	Cs	Nb	-2.431059803	OrthoPerovskite_GdFeO3	-2.5084178	train	-2.4211866855621342	-2.5016092770619855	Cs	Nb	4.140982	4.14163051	4.14163051	90.01318640000001	90.0	90.0	cubic	cubic	3	3
447	CsNbO3	682181	Nb	Cs	-2.574099119	OrthoPerovskite_GdFeO3	-2.579366	train	-2.421013355255127	-2.5764768515370617			6.001471	6.280718	11.563191999999999	90.0	90.0	90.0	orthorhombic	other	1	0
448	CsOsO3	681531	Cs	Os	-1.165144485	OrthoPerovskite_GdFeO3	-1.0872216000000001	test	-1.0650856494903564	-1.0019022746687452	Cs	Os	4.022631	4.028503	4.028503	89.98104275000001	90.00000778000002	89.99999222	cubic	cubic	4	4
449	CsOsO3	681532	Os	Cs	-1.3829762669999999	OrthoPerovskite_GdFeO3	-1.383825	test	-0.915562629699707	-1.314890865486567			6.721736	7.189759	10.107314	90.0	90.0	90.0	orthorhombic	other	0	0
450	CsPaO3	681491	Cs	Pa	-2.87116096	OrthoPerovskite_GdFeO3	-2.935889	train	-2.713907480239868	-2.952695166513027	Cs	Pa	4.4592955000000005	4.46080687	4.46080687	89.98262563000002	90.0	90.0	cubic	cubic	0	3
451	CsPbO3	682558	Cs	Pb	-0.94687627	OrthoPerovskite_GdFeO3	-1.0085425	test	-0.9150846004486084	-0.9188767239305723	Cs	Pb	4.40577963	4.40577963	4.406438	90.0	90.0	90.03567932	cubic	cubic	2	1
452	CsPdO3	682765	Cs	Pd	-0.5145633310000001	OrthoPerovskite_GdFeO3	-0.6677038000000001	train	-0.6071348190307617	-0.559209152995181	Cs	Pd	4.1650480000000005	5.793038	5.793913	90.0	90.0	90.0	tetragonal	tetragonal	3	3
453	CsPdO3	682766	Pd	Cs	-0.714196319	OrthoPerovskite_GdFeO3	-0.8902028000000001	train	-0.6817761659622192	-0.7939996121348083			6.350547	6.642195	9.482545	90.0	90.0	90.0	orthorhombic	other	0	0
454	CsPmO3	682582	Cs	Pm	-2.00887479	OrthoPerovskite_GdFeO3	-2.0371702000000003	train	-1.9119415283203125	-2.00432865839652	Cs	Pm	4.583893499999999	4.58669683	4.58669683	90.57570119	90.0	90.0	cubic	cubic	3	1
455	CsPmO3	682583	Pm	Cs	-1.87224973	OrthoPerovskite_GdFeO3	-1.9594216	train	-1.765790343284607	-1.922285011047708			5.493427	6.202626	11.340083	90.0	90.0	90.0	orthorhombic	other	4	4
456	CsPtO3	682829	Pt	Cs	-0.822685142	OrthoPerovskite_GdFeO3	-0.9654414000000001	train	-0.7337502241134644	-0.8733946001528344			5.952516999999999	7.002828999999999	10.721472	90.0	90.0	90.0	orthorhombic	other	0	0
457	CsReO3	693138	Cs	Re	-1.59867269	OrthoPerovskite_GdFeO3	-1.498642	test	-1.5813956260681152	-1.4360506736072083	Cs	Re	4.02749	4.032578400000001	4.0325784	90.01681823000001	89.99998444000002	90.00001556	cubic	cubic	2	3
458	CsRhO3	682969	Rh	Cs	-1.0043734340000001	OrthoPerovskite_GdFeO3	-0.9564093000000001	train	-0.9616115689277648	-0.8638635420087751			5.133018	6.46531	11.662127	90.0	90.0	90.0	orthorhombic	other	0	1
459	CsRuO3	682655	Cs	Ru	-1.103825022	OrthoPerovskite_GdFeO3	-1.1728258	test	-1.1136541366577148	-1.0922354870529827	Cs	Ru	4.03065594	4.03069583	4.038233	90.0	90.0	90.00565898	cubic	cubic	5	2
460	CsRuO3	682656	Ru	Cs	-1.331241353	OrthoPerovskite_GdFeO3	-1.3546789	test	-1.196357488632202	-1.2841346544423395			5.317761	5.932404	11.919597999999999	90.0	90.0	90.0	orthorhombic	other	0	0
461	CsSmO3	682488	Cs	Sm	-2.027441018	OrthoPerovskite_GdFeO3	-2.0287433	train	-2.036527156829834	-1.9954362331715805	Cs	Sm	4.585069	4.5917921800000014	4.592079099999999	90.19770386	89.99992408	90.00014933000001	cubic	cubic	2	3
462	CsSnO3	682454	Cs	Sn	-1.377053769	OrthoPerovskite_GdFeO3	-1.4015278999999998	train	-1.374295949935913	-1.3335717225650385	Cs	Sn	4.23031687	4.23018449	4.230963	90.0	90.0	90.07794937	cubic	cubic	1	4
463	CsSnO3	682455	Sn	Cs	-1.362369655	OrthoPerovskite_GdFeO3	-1.4053928999999998	train	-1.2226498126983645	-1.3376502358373439			5.965468	6.91847	10.052885	90.0	90.0	90.0	orthorhombic	other	4	3
464	CsTaO3	681628	Cs	Ta	-2.628330186	OrthoPerovskite_GdFeO3	-2.6526866	test	-2.502776861190796	-2.653847883938974	Cs	Ta	4.11653018	4.11653054	4.116868	90.0	90.0	90.01714449	cubic	cubic	2	3
465	CsTcO3	681500	Tc	Cs	-1.720302948	OrthoPerovskite_GdFeO3	-1.7378346999999998	train	-1.594989776611328	-1.6884570388306344			5.420408999999999	6.377141	11.721489	90.0	90.0	90.0	orthorhombic	other	0	0
466	CsTeO3	681595	Cs	Te	-1.2680954740000001	OrthoPerovskite_GdFeO3	-1.2864432	train	-1.1657562255859375	-1.2121294259572055	Cs	Te	4.21965	4.22016029	4.22014998	89.97679636999997	90.0	90.0	cubic	cubic	3	3
467	CsTeO3	681596	Te	Cs	-1.388481558	OrthoPerovskite_GdFeO3	-1.3987694	train	-1.026850700378418	-1.3306608354080776			6.23485	6.401298000000001	11.641794	90.0	90.0	90.0	orthorhombic	other	1	1
468	CsThO3	681893	Th	Cs	-2.674496945	OrthoPerovskite_GdFeO3	-2.6953522999999997	test	-2.303957939147949	-2.698870555018455			5.729561	5.99868	13.409237	90.0	90.0	90.0	orthorhombic	other	3	3
469	CsTlO3	682810	Cs	Tl	-0.56720335	OrthoPerovskite_GdFeO3	-0.71957844	train	-0.5322197675704956	-0.6139494913486248	Cs	Tl	4.354873	6.398905	6.400049	89.970187	90.0	90.0	tetragonal	tetragonal	0	3
470	CsUO3	682588	Cs	U	-3.045010964	OrthoPerovskite_GdFeO3	-3.0258762999999997	train	-3.106837749481201	-3.0476536134441834	Cs	U	4.41598791	4.41598791	4.4171615	90.0	90.0	90.00073396	cubic	cubic	0	0
471	CsWO3	682482	Cs	W	-2.0532904	OrthoPerovskite_GdFeO3	-2.0047357	train	-1.9367539882659912	-1.970102387056135	Cs	W	4.057814	4.05854082	4.05854004	90.06484609	90.0	90.0	cubic	cubic	3	1
472	CuAgO3	682872	Cu	Ag	-0.23032773199999998	OrthoPerovskite_GdFeO3	-0.26988690000000004	train	-0.2584339380264282	-0.13941574895964295			4.94696	5.214048	8.14615	90.0	90.0	90.0	orthorhombic	other	0	2
473	CuAgO3	682873	Ag	Cu	-0.224261052	OrthoPerovskite_GdFeO3	-0.27993554	train	-0.26833271980285645	-0.15001950358024266			5.065622	5.322158	7.582793	90.0	90.0	90.0	orthorhombic	other	1	1
474	CuAsO3	693387	Cu	As	-1.015369288	OrthoPerovskite_GdFeO3	-1.0530828	test	-1.0567855834960938	-0.9658775530903295			5.08689	5.170324	7.301964999999999	90.0	90.0	90.0	orthorhombic	other	1	1
475	CuBiO3	681934	Bi	Cu	-1.063158214	OrthoPerovskite_GdFeO3	-1.1542403	train	-0.9964034557342528	-1.0726232727134148	Bi	Cu	5.368664	5.947866	7.407571000000001	90.0	90.0	90.0	orthorhombic	orthorhombic	0	0
476	CuBiO3	681935	Cu	Bi	-0.958726124	OrthoPerovskite_GdFeO3	-1.0379424000000002	train	-0.8947926759719849	-0.9499007555876099			5.550383999999999	5.560849	8.009830000000001	90.0	90.0	90.0	tetragonal	other	4	2
477	CuHgO3	682754	Hg	Cu	-0.290459957	OrthoPerovskite_GdFeO3	-0.40240902	train	-0.28424227237701416	-0.2792587567976862	Hg	Cu	5.314612	5.424404	7.537959	90.0	90.0	90.0	orthorhombic	orthorhombic	0	2
478	CuHgO3	682755	Cu	Hg	-0.19539844899999997	OrthoPerovskite_GdFeO3	-0.3310935	train	-0.2451314926147461	-0.20400357055154003			5.175783999999999	5.3521540000000005	8.374951	90.0	90.0	90.0	orthorhombic	other	2	3
479	CuMoO3	682208	Mo	Cu	-1.4218117319999999	OrthoPerovskite_GdFeO3	-1.5421283000000001	train	-1.4602243900299072	-1.4819392768965876			5.221398000000001	5.253703	7.75397	90.0	90.0	90.0	orthorhombic	other	4	4
480	CuMoO3	682209	Cu	Mo	-1.631764635	OrthoPerovskite_GdFeO3	-1.7276964	train	-1.565631628036499	-1.6777586711440593			5.175828	5.442678	7.568728	90.0	90.0	90.0	orthorhombic	other	1	1
481	CuOsO3	693064	Cu	Os	-0.9619896929999999	OrthoPerovskite_GdFeO3	-0.98633474	train	-0.8937983512878418	-0.8954421459465697	Cu	Os	5.221028	5.2222800000000005	7.464622	90.0	90.0	90.0	tetragonal	tetragonal	1	0
482	CuPbO3	682114	Pb	Cu	-0.931351873	OrthoPerovskite_GdFeO3	-1.0118631999999999	train	-0.8945724964141846	-0.9223808685679188	Pb	Cu	5.274531	5.674056	7.582075	90.0	90.0	90.0	orthorhombic	orthorhombic	0	0
483	CuReO3	693129	Cu	Re	-1.289445846	OrthoPerovskite_GdFeO3	-1.1964426000000001	test	-1.303398847579956	-1.1171569442973244			5.177793	5.3254	7.446947	90.0	90.0	90.0	orthorhombic	other	1	1
484	CuRuO3	693370	Cu	Ru	-0.954589635	OrthoPerovskite_GdFeO3	-0.9412264000000001	test	-0.9308013916015624	-0.8478418966887016			5.108789	5.125469	7.478769000000001	90.0	90.0	90.0	tetragonal	other	0	0
485	CuSbO3	693117	Cu	Sb	-1.281243058	OrthoPerovskite_GdFeO3	-1.3404207000000001	test	-1.2104287147521973	-1.2690887921036118			5.335621	5.417952	7.661714999999999	90.0	90.0	90.0	orthorhombic	other	1	1
486	CuTcO3	682072	Cu	Tc	-1.262008764	OrthoPerovskite_GdFeO3	-1.2726253	train	-1.350149393081665	-1.1975481870062645			5.148963	5.263142	7.446548	90.0	90.0	90.0	orthorhombic	other	1	1
487	CuTcO3	682073	Tc	Cu	-1.0494458740000001	OrthoPerovskite_GdFeO3	-1.2389801999999999	train	-1.0616278648376465	-1.1620444387790871			5.271662	5.2833	7.177575	90.0	90.0	90.0	tetragonal	other	3	2
488	CuTeO3	693294	Cu	Te	-0.9487653779999999	OrthoPerovskite_GdFeO3	-0.9949631	train	-1.106907844543457	-0.9045471603781939			5.4056370000000005	5.684922	7.892288000000001	90.0	90.0	90.0	orthorhombic	other	1	1
489	CuWO3	693096	Cu	W	-1.72789743	OrthoPerovskite_GdFeO3	-1.7398502	train	-1.7183352708816528	-1.6905838806159725			5.19566	5.4846580000000005	7.592067	90.0	90.0	90.0	orthorhombic	other	1	2
490	DyAlO3	682932	Al	Dy	-3.3368911480000003	OrthoPerovskite_GdFeO3	-3.2830105000000005	train	-3.3136446475982666	-3.3189926166689214			5.361713	5.374001	8.352611999999999	90.0	90.0	90.0	tetragonal	other	5	5
491	DyAlO3	682933	Dy	Al	-3.5876483589999997	OrthoPerovskite_GdFeO3	-3.416718	train	-3.638218402862549	-3.460086488171317	Dy	Al	5.174842	5.338049	7.3834729999999995	90.0	90.0	90.0	orthorhombic	orthorhombic	0	1
492	DyBeO3	693181	Dy	Be	-2.7566195060000003	OrthoPerovskite_GdFeO3	-2.7851992	test	-2.846991539001465	-2.79368084586593	Dy	Be	4.948251	5.294547000000001	7.077153	90.0	90.0	90.0	orthorhombic	orthorhombic	1	0
493	DyCoO3	681436	Co	Dy	-2.253084599	OrthoPerovskite_GdFeO3	-2.252043	test	-2.3477983474731445	-2.231071625190156			5.448930000000001	5.5101	8.313153	90.0	90.0	90.0	orthorhombic	other	5	4
494	DyCoO3	681437	Dy	Co	-2.53182829	OrthoPerovskite_GdFeO3	-2.4491400000000003	test	-2.604181289672852	-2.4390568077080244	Dy	Co	5.178218	5.55831	7.467459	90.0	90.0	90.0	orthorhombic	orthorhombic	0	0
495	DyCrO3	693101	Dy	Cr	-3.203537636	OrthoPerovskite_GdFeO3	-3.1362544999999997	test	-3.064957857131958	-3.1641294099961033	Dy	Cr	5.265291	5.568773	7.581755	90.0	90.0	90.0	orthorhombic	orthorhombic	0	1
496	DyCuO3	682460	Cu	Dy	-2.0035293999999997	OrthoPerovskite_GdFeO3	-1.9267352	test	-2.1176679134368896	-1.8877929240557596			5.466251000000001	5.567928	8.028344	90.0	90.0	90.0	orthorhombic	other	5	5
497	DyCuO3	682461	Dy	Cu	-2.281888487	OrthoPerovskite_GdFeO3	-2.2310472000000003	test	-2.49532413482666	-2.2089159592231016	Dy	Cu	5.205337	5.859891999999999	7.189075999999999	90.0	90.0	90.0	orthorhombic	orthorhombic	0	0
498	DyFeO3	693143	Dy	Fe	-2.7824958110000004	OrthoPerovskite_GdFeO3	-2.9261053	train	-2.821152210235596	-2.9423709879095985	Dy	Fe	5.282769999999999	5.597208	7.6105	90.0	90.0	90.0	orthorhombic	orthorhombic	0	0
499	DyGaO3	693056	Dy	Ga	-2.971864547	OrthoPerovskite_GdFeO3	-2.8560470000000002	test	-3.0163733959198	-2.868442473967775	Dy	Ga	5.262576	5.55832	7.560467999999999	90.0	90.0	90.0	orthorhombic	orthorhombic	0	0
500	DyMgO3	693533	Dy	Mg	-2.9268268180000003	OrthoPerovskite_GdFeO3	-2.9300384999999998	test	-2.9759976863861084	-2.9465214687382217	Dy	Mg	5.385337	5.727278	7.405914	90.0	90.0	90.0	orthorhombic	orthorhombic	0	0
501	DyMnO3	693128	Dy	Mn	-2.960169159	OrthoPerovskite_GdFeO3	-2.9449017000000004	train	-2.9819085597991943	-2.9622057529475185	Dy	Mn	5.280767	5.720815	7.486331	90.0	90.0	90.0	orthorhombic	orthorhombic	0	0
502	DyNiO3	682398	Ni	Dy	-2.128270641	OrthoPerovskite_GdFeO3	-2.1939716000000002	test	-2.0220003128051762	-2.1697922007033905			5.638051	5.643895	7.75405	90.0	90.0	90.0	tetragonal	other	3	2
503	DyNiO3	682399	Dy	Ni	-2.408256464	OrthoPerovskite_GdFeO3	-2.37928	test	-2.5214591026306152	-2.3653375484057606	Dy	Ni	5.165793	5.517515	7.395042	90.0	90.0	90.0	orthorhombic	orthorhombic	0	0
504	DyPbO3	693409	Pb	Dy	-2.419909872	OrthoPerovskite_GdFeO3	-2.4347067000000004	train	-2.311864852905273	-2.423826172361798			5.80467	6.054995	8.466016	90.0	90.0	90.0	orthorhombic	other	0	0
505	DyPdO3	693524	Dy	Pd	-2.204946899	OrthoPerovskite_GdFeO3	-2.256264	train	-2.252511739730835	-2.235525804885473	Dy	Pd	5.377649	5.881149	7.507849	90.0	90.0	90.0	orthorhombic	orthorhombic	0	0
506	DyScO3	693532	Dy	Sc	-3.8026251789999996	OrthoPerovskite_GdFeO3	-3.584518	train	-3.71553373336792	-3.637156223512283	Dy	Sc	5.422047	5.710516999999999	7.8858880000000005	90.0	90.0	90.0	orthorhombic	orthorhombic	0	0
507	DyTiO3	693050	Dy	Ti	-3.463523527	OrthoPerovskite_GdFeO3	-3.3837964999999994	train	-3.3711459636688232	-3.425346313606194	Dy	Ti	5.299444	5.668006	7.630383999999999	90.0	90.0	90.0	orthorhombic	orthorhombic	0	0
508	DyVO3	693317	Dy	V	-3.2705155639999997	OrthoPerovskite_GdFeO3	-3.2967649	train	-3.1093220710754395	-3.333506847704521	Dy	V	5.295977	5.6592519999999995	7.618042	90.0	90.0	90.0	orthorhombic	orthorhombic	0	0
509	DyZnO3	693290	Dy	Zn	-2.448599429	OrthoPerovskite_GdFeO3	-2.4126790000000002	train	-2.570711612701416	-2.4005816013893893	Dy	Zn	5.236937999999999	5.774719999999999	7.459358	90.0	90.0	90.0	orthorhombic	orthorhombic	0	0
510	ErAlO3	681554	Er	Al	-3.6024715260000004	OrthoPerovskite_GdFeO3	-3.5769122	train	-3.7135510444641113	-3.629130258118622	Er	Al	5.13071	5.341464	7.343209	90.0	90.0	90.0	orthorhombic	orthorhombic	0	0
511	ErBeO3	693253	Er	Be	-2.772035822	OrthoPerovskite_GdFeO3	-2.7960477000000004	train	-2.900498151779175	-2.8051286469615584	Er	Be	4.9173029999999995	5.319592	7.003711	90.0	90.0	90.0	orthorhombic	orthorhombic	1	1
512	ErCoO3	693055	Er	Co	-2.5510811909999997	OrthoPerovskite_GdFeO3	-2.4807183999999998	train	-2.633368730545044	-2.472379685720486	Er	Co	5.1440470000000005	5.548789	7.427689999999999	90.0	90.0	90.0	orthorhombic	orthorhombic	0	0
513	ErCrO3	693216	Er	Cr	-3.217079137	OrthoPerovskite_GdFeO3	-3.228208	train	-3.122423887252808	-3.2611626752444676	Er	Cr	5.230395	5.550779	7.545027	90.0	90.0	90.0	orthorhombic	orthorhombic	0	0
514	ErCuO3	693082	Er	Cu	-2.296069754	OrthoPerovskite_GdFeO3	-2.2784867	test	-2.5349788665771484	-2.2589761481963295	Er	Cu	5.1794080000000005	5.848713	7.1372279999999995	90.0	90.0	90.0	orthorhombic	orthorhombic	0	0
515	ErFeO3	693254	Er	Fe	-2.794605779	OrthoPerovskite_GdFeO3	-2.898016	test	-2.8540916442871094	-2.912729957415481	Er	Fe	5.2464699999999995	5.57766	7.578450999999999	90.0	90.0	90.0	orthorhombic	orthorhombic	0	0
516	ErGaO3	693170	Er	Ga	-2.985400326	OrthoPerovskite_GdFeO3	-2.7520905	test	-3.0601749420166016	-2.7587431298558975	Er	Ga	5.225397	5.544201999999999	7.519533	90.0	90.0	90.0	orthorhombic	orthorhombic	0	1
517	ErMnO3	693264	Er	Mn	-2.97114086	OrthoPerovskite_GdFeO3	-2.9173303	train	-3.0210905075073238	-2.9331112326794617	Er	Mn	5.243453	5.699249	7.457250999999999	90.0	90.0	90.0	orthorhombic	orthorhombic	0	0
518	ErNiO3	682084	Ni	Er	-2.154561276	OrthoPerovskite_GdFeO3	-2.1096093999999996	train	-2.079937696456909	-2.0807695998286486			5.589404	5.617882	7.683664	90.0	90.0	90.0	orthorhombic	other	4	4
519	ErNiO3	682085	Er	Ni	-2.422427138	OrthoPerovskite_GdFeO3	-2.423771	train	-2.591766119003296	-2.4122863540973865	Er	Ni	5.115682	5.532359	7.325925999999999	90.0	90.0	90.0	orthorhombic	orthorhombic	0	0
520	ErNpO3	693411	Np	Er	-3.6985513180000003	OrthoPerovskite_GdFeO3	-3.6240404	train	-3.7536349296569824	-3.6788619500202673	Np	Er	5.781267	6.070228	8.297849000000001	90.0	90.0	90.0	orthorhombic	orthorhombic	0	1
521	ErPbO3	693384	Pb	Er	-2.445988081	OrthoPerovskite_GdFeO3	-2.4658966	train	-2.3687217235565186	-2.4567390885615072	Pb	Er	5.765747	6.019152	8.404732000000001	90.0	90.0	90.0	orthorhombic	orthorhombic	0	0
522	ErTiO3	693185	Er	Ti	-3.472776575	OrthoPerovskite_GdFeO3	-3.3468335	train	-3.4237575531005864	-3.3863413754214022	Er	Ti	5.2616879999999995	5.648696	7.594888	90.0	90.0	90.0	orthorhombic	orthorhombic	0	0
523	ErVO3	693471	Er	V	-3.281541865	OrthoPerovskite_GdFeO3	-3.2668526	train	-3.152027130126953	-3.30194210965661	Er	V	5.263116	5.636677	7.58493	90.0	90.0	90.0	orthorhombic	orthorhombic	0	0
524	ErZnO3	693464	Er	Zn	-2.458593209	OrthoPerovskite_GdFeO3	-2.3947854	test	-2.6356453895568848	-2.381699509516343	Er	Zn	5.209976999999999	5.74055	7.415545	90.0	90.0	90.0	orthorhombic	orthorhombic	0	0
525	EuAgO3	682910	Eu	Ag	-1.51699319	OrthoPerovskite_GdFeO3	-1.4889808999999998	train	-1.5899726152420044	-1.4258558677663105	Eu	Ag	5.537816	5.809861	7.843039	90.0	90.0	90.0	orthorhombic	orthorhombic	0	0
526	EuAgO3	682911	Ag	Eu	-1.1703526770000001	OrthoPerovskite_GdFeO3	-1.2385857	train	-1.2401375770568848	-1.1616281455097668			5.683601	5.955889	8.268139	90.0	90.0	90.0	orthorhombic	other	4	5
527	EuAlO3	682915	Al	Eu	-2.925083367	OrthoPerovskite_GdFeO3	-2.8827617	train	-3.1463868618011475	-2.8966329677622524			5.134082	5.797264	8.57784	90.0	90.0	90.0	orthorhombic	other	3	3
528	EuAsO3	682884	Eu	As	-2.3108860140000003	OrthoPerovskite_GdFeO3	-2.3490148	train	-2.246354341506958	-2.333400415187397	Eu	As	5.472086	5.493604	7.758752	90.0	90.0	90.0	tetragonal	tetragonal	1	2
529	EuAsO3	682885	As	Eu	-2.292003974	OrthoPerovskite_GdFeO3	-2.29028	train	-2.1892743110656743	-2.271420942652805			5.5283809999999995	5.937178	8.682737	90.0	90.0	90.0	orthorhombic	other	4	4
530	EuAuO3	682900	Eu	Au	-1.5871114640000001	OrthoPerovskite_GdFeO3	-1.6064878	train	-1.585541844367981	-1.54985417339049	Eu	Au	5.610076	5.931244	7.689902	90.0	90.0	90.0	orthorhombic	orthorhombic	0	1
531	EuAuO3	682901	Au	Eu	-1.298719218	OrthoPerovskite_GdFeO3	-1.4008764999999999	train	-1.3394768238067627	-1.3328843374303478			5.921825	6.082953	8.102765	90.0	90.0	90.0	orthorhombic	other	4	4
532	EuBeO3	682926	Eu	Be	-2.308262364	OrthoPerovskite_GdFeO3	-2.5093756000000003	test	-2.4221973419189453	-2.5026199885787292	Eu	Be	3.5782190000000003	3.58547989	3.58547707	90.12028356	90.0	90.0	cubic	cubic	3	0
533	EuBeO3	682927	Be	Eu	-2.554321491	OrthoPerovskite_GdFeO3	-2.4907383999999997	test	-2.3795456886291504	-2.482953218188403			5.064648	5.911129	7.173182000000001	90.0	90.0	90.0	orthorhombic	other	0	2
534	EuBiO3	682372	Eu	Bi	-2.255179031	OrthoPerovskite_GdFeO3	-2.3215914	train	-2.143052339553833	-2.3044620708480084	Eu	Bi	5.807212	6.071207	8.373294999999999	90.0	90.0	90.0	orthorhombic	orthorhombic	0	0
535	EuBiO3	682373	Bi	Eu	-2.121754046	OrthoPerovskite_GdFeO3	-2.2211528	train	-2.0471634864807133	-2.1984749652459996			5.922745	6.1149059999999995	8.628276	90.0	90.0	90.0	orthorhombic	other	2	2
536	EuCdO3	682635	Eu	Cd	-1.689730723	OrthoPerovskite_GdFeO3	-1.7160758999999999	train	-1.8903900384902956	-1.665496222636731	Eu	Cd	5.658544	5.959812	7.949191000000001	90.0	90.0	90.0	orthorhombic	orthorhombic	0	0
537	EuCdO3	682636	Cd	Eu	-1.587763679	OrthoPerovskite_GdFeO3	-1.6484453999999997	train	-1.5968124866485596	-1.5941296270707168			5.857652	6.064234	8.158487	90.0	90.0	90.0	orthorhombic	other	2	3
538	EuCoO3	682722	Eu	Co	-2.138463969	OrthoPerovskite_GdFeO3	-2.2416544	train	-2.0319619178771973	-2.220109130240435	Eu	Co	5.257612	5.313162	5.32172143	119.94680895	119.60229053	90.0	error	other	0	0
539	EuCoO3	682723	Co	Eu	-1.837243912	OrthoPerovskite_GdFeO3	-1.9010392	train	-2.1088876724243164	-1.8606774060621873			5.482377	5.678558	8.584177	90.0	90.0	90.0	orthorhombic	other	5	5
540	EuCrO3	682773	Eu	Cr	-2.799827001	OrthoPerovskite_GdFeO3	-2.7507923	test	-2.7573049068450928	-2.7573732137032176	Eu	Cr	5.33366	5.351955	7.569238	90.0	90.0	90.0	tetragonal	tetragonal	0	1
541	EuCrO3	682774	Cr	Eu	-2.579790857	OrthoPerovskite_GdFeO3	-2.5710485	test	-2.683692455291748	-2.5676998698702054			5.536076	5.596207	8.732777	90.0	90.0	90.0	orthorhombic	other	4	4
542	EuCuO3	681577	Eu	Cu	-1.782517734	OrthoPerovskite_GdFeO3	-1.9169337	train	-1.822855353355408	-1.87744996213118	Eu	Cu	5.268529	5.329052	7.509482000000001	90.0	90.0	90.0	orthorhombic	orthorhombic	0	1
543	EuCuO3	681578	Cu	Eu	-1.737712186	OrthoPerovskite_GdFeO3	-1.7115909	train	-1.7422637939453125	-1.660763458852439			4.838113	5.893772	8.930925	90.0	90.0	90.0	orthorhombic	other	4	4
544	EuDyO3	693157	Eu	Dy	-3.173310498	OrthoPerovskite_GdFeO3	-3.146061	test	-3.2092480659484863	-3.1744776481344896			5.866104	6.064235	8.278066	90.0	90.0	90.0	orthorhombic	other	0	0
545	EuErO3	693073	Eu	Er	-3.2085954830000003	OrthoPerovskite_GdFeO3	-3.110963	train	-3.259892463684082	-3.1374407376994644	Eu	Er	5.813409	6.018407	8.235591000000001	90.0	90.0	90.0	orthorhombic	orthorhombic	0	2
546	EuFeO3	681563	Eu	Fe	-2.416663421	OrthoPerovskite_GdFeO3	-2.288033	test	-2.3285107612609863	-2.2690498121682334	Eu	Fe	5.3235019999999995	5.36342	7.55122	90.0	90.0	90.0	orthorhombic	orthorhombic	0	3
547	EuFeO3	681564	Fe	Eu	-2.1303082030000002	OrthoPerovskite_GdFeO3	-2.0845868999999997	test	-2.234130382537842	-2.054364787834791			5.642663	5.670026999999999	8.401136	90.0	90.0	90.0	tetragonal	other	4	5
548	EuGaO3	681846	Eu	Ga	-2.4263701319999997	OrthoPerovskite_GdFeO3	-2.4459007	test	-2.5607829093933105	-2.435638559831445	Eu	Ga	5.403825	5.448992	7.663761	90.0	90.0	90.0	orthorhombic	orthorhombic	1	2
549	EuGaO3	681847	Ga	Eu	-2.388687275	OrthoPerovskite_GdFeO3	-2.3132815	test	-2.4320642948150635	-2.295693109026138			5.225286	5.828688	8.783209	90.0	90.0	90.0	orthorhombic	other	4	5
550	EuGdO3	693237	Eu	Gd	-3.132042413	OrthoPerovskite_GdFeO3	-3.1321464	train	-3.213348388671875	-3.1597943672085336			5.913164	6.098259	8.352665	90.0	90.0	90.0	orthorhombic	other	0	0
551	EuGeO3	681555	Eu	Ge	-2.703196207	OrthoPerovskite_GdFeO3	-2.4814230999999998	test	-2.541342735290528	-2.473123315294352	Eu	Ge	5.297422	5.325522	7.506757	90.0	90.0	90.0	orthorhombic	orthorhombic	1	4
552	EuGeO3	681556	Ge	Eu	-2.571928738	OrthoPerovskite_GdFeO3	-2.6686482000000002	test	-2.6907753944396973	-2.6706912467972477			5.202689	5.204428	10.000263	90.0	90.0	90.0	tetragonal	other	4	1
553	EuHfO3	681970	Eu	Hf	-3.844273948	OrthoPerovskite_GdFeO3	-3.7081593999999996	train	-3.6666626930236816	-3.767627915855467	Eu	Hf	5.623132	5.727298	8.009741	90.0	90.0	90.0	orthorhombic	orthorhombic	0	1
554	EuHfO3	681971	Hf	Eu	-3.496982937	OrthoPerovskite_GdFeO3	-3.524782	train	-3.4927287101745605	-3.574120241925108			5.75317	5.84741	8.534882000000001	90.0	90.0	90.0	orthorhombic	other	4	3
555	EuHgO3	681624	Eu	Hg	-1.495649249	OrthoPerovskite_GdFeO3	-1.5651997	train	-1.4893461465835571	-1.5062852047389328	Eu	Hg	5.7302040000000005	6.504233	7.508853	90.0	90.0	90.0	orthorhombic	orthorhombic	0	0
556	EuHgO3	681625	Hg	Eu	-1.2401095709999999	OrthoPerovskite_GdFeO3	-1.3351753	train	-1.240934133529663	-1.2635536217236505			6.049523000000001	6.235864	7.991119	90.0	90.0	90.0	orthorhombic	other	4	4
557	EuHoO3	682574	Eu	Ho	-3.191704319	OrthoPerovskite_GdFeO3	-3.1447034	test	-3.25821590423584	-3.173045050561791			5.834841	6.039046	8.265805	90.0	90.0	90.0	orthorhombic	other	0	1
558	EuHoO3	682575	Ho	Eu	-3.099819003	OrthoPerovskite_GdFeO3	-3.0259387	test	-3.218791961669922	-3.047719460592487			5.675098	5.787978	9.252034	90.0	90.0	90.0	orthorhombic	other	2	3
559	EuInO3	682836	Eu	In	-2.2169498130000003	OrthoPerovskite_GdFeO3	-2.398214	test	-2.3459789752960205	-2.3853175148476304	Eu	In	5.68688	5.960381	7.949064999999999	90.0	90.0	90.0	orthorhombic	orthorhombic	0	0
560	EuInO3	682837	In	Eu	-2.136391131	OrthoPerovskite_GdFeO3	-2.2346506	test	-2.0103206634521484	-2.2127184209890585			5.686388	6.046454	8.72345	90.0	90.0	90.0	orthorhombic	other	2	3
561	EuIrO3	682142	Eu	Ir	-2.097427207	OrthoPerovskite_GdFeO3	-2.188515	test	-1.9766511917114256	-2.164034163052249	Eu	Ir	5.351251	5.694603	7.722333	90.0	90.0	90.0	orthorhombic	orthorhombic	0	0
562	EuIrO3	682143	Ir	Eu	-1.7317716319999998	OrthoPerovskite_GdFeO3	-1.7541491000000002	test	-1.5846307277679443	-1.7056726913350844			5.79387	6.1226910000000005	8.295810000000001	90.0	90.0	90.0	orthorhombic	other	5	5
563	EuLuO3	682386	Eu	Lu	-3.260969027	OrthoPerovskite_GdFeO3	-3.281539	train	-3.446422576904297	-3.317439826945713	Eu	Lu	5.7394419999999995	5.952247	8.162352	90.0	90.0	90.0	orthorhombic	orthorhombic	0	1
564	EuLuO3	682387	Lu	Eu	-3.127512613	OrthoPerovskite_GdFeO3	-3.116632	train	-3.2781095504760738	-3.1434229089130996			5.582105	5.682396	9.331357	90.0	90.0	90.0	orthorhombic	other	3	4
565	EuMgO3	682878	Eu	Mg	-2.357393126	OrthoPerovskite_GdFeO3	-2.4185395	test	-2.516276359558105	-2.4067658515918073	Eu	Mg	5.219011	5.8449800000000005	7.791761999999999	90.0	90.0	90.0	orthorhombic	orthorhombic	1	2
566	EuMgO3	682879	Mg	Eu	-2.413039215	OrthoPerovskite_GdFeO3	-2.5956740000000003	test	-2.579020977020264	-2.5936857504878397			5.899038	6.061646	7.201888	90.0	90.0	90.0	orthorhombic	other	0	0
567	EuMnO3	682897	Mn	Eu	-2.279769914	OrthoPerovskite_GdFeO3	-2.2685008	train	-2.4869983196258545	-2.2484385995065717			5.6054	5.659776	8.448522	90.0	90.0	90.0	orthorhombic	other	4	4
568	EuMoO3	682844	Eu	Mo	-2.81466889	OrthoPerovskite_GdFeO3	-2.8234272000000002	train	-2.756103277206421	-2.8340206661437275	Eu	Mo	5.489758	5.586599	7.830261	90.0	90.0	90.0	orthorhombic	orthorhombic	0	1
569	EuMoO3	682845	Mo	Eu	-2.441788521	OrthoPerovskite_GdFeO3	-2.4463778	train	-2.572020530700684	-2.4361420161528464			5.430274	6.124112	8.297804	90.0	90.0	90.0	orthorhombic	other	4	4
570	EuNbO3	682054	Eu	Nb	-3.2110013210000004	OrthoPerovskite_GdFeO3	-3.0370592999999997	test	-3.0596735477447514	-3.0594543932434566	Eu	Nb	5.570962000000001	5.681257	7.963108999999999	90.0	90.0	90.0	orthorhombic	orthorhombic	0	2
571	EuNbO3	682055	Nb	Eu	-2.8652821580000003	OrthoPerovskite_GdFeO3	-2.8276086	test	-2.8785245418548584	-2.8384330582256982			5.68048	6.069194	8.177128	90.0	90.0	90.0	orthorhombic	other	4	4
572	EuNiO3	682302	Eu	Ni	-1.894706959	OrthoPerovskite_GdFeO3	-2.0687428	test	-1.9113402366638184	-2.0376454160009665	Eu	Ni	5.280215	5.2866599999999995	7.53683	90.0	90.0	90.0	tetragonal	tetragonal	0	0
573	EuNpO3	693488	Eu	Np	-3.586128187	OrthoPerovskite_GdFeO3	-3.5634873	train	-3.4916701316833496	-3.614963729572859	Eu	Np	5.882434	6.105758	8.465157000000001	90.0	90.0	90.0	orthorhombic	orthorhombic	0	0
574	EuOsO3	682374	Eu	Os	-2.19875982	OrthoPerovskite_GdFeO3	-2.2306277999999997	train	-2.099682569503784	-2.2084733904090244	Eu	Os	5.377031	5.624141000000001	7.734242999999999	90.0	90.0	90.0	orthorhombic	orthorhombic	0	0
575	EuOsO3	682375	Os	Eu	-1.826786836	OrthoPerovskite_GdFeO3	-1.8854229999999998	train	-1.882641315460205	-1.8441985240536558			5.1331489999999995	6.368341	8.116922	90.0	90.0	90.0	orthorhombic	other	5	5
576	EuPaO3	681583	Eu	Pa	-3.3408602419999998	OrthoPerovskite_GdFeO3	-3.2960038000000003	train	-3.276646137237549	-3.33270370243892	Eu	Pa	5.961538	6.200169	8.590850999999999	90.0	90.0	90.0	orthorhombic	orthorhombic	0	0
577	EuPaO3	681584	Pa	Eu	-3.1958901839999996	OrthoPerovskite_GdFeO3	-3.2587113	train	-3.0859966278076167	-3.293351061764289			5.733511	5.956994	9.356471	90.0	90.0	90.0	orthorhombic	other	2	1
578	EuPbO3	682396	Eu	Pb	-2.177412265	OrthoPerovskite_GdFeO3	-2.2554347999999997	train	-2.1345500946044917	-2.2346507975878285	Eu	Pb	5.726304	5.984156	8.227302	90.0	90.0	90.0	orthorhombic	orthorhombic	0	0
579	EuPbO3	682397	Pb	Eu	-1.9861630940000001	OrthoPerovskite_GdFeO3	-2.0289464	train	-2.005594253540039	-1.9956505529763944			5.931679	5.957934	8.650927000000001	90.0	90.0	90.0	tetragonal	other	3	4
580	EuPdO3	681426	Eu	Pd	-1.884317548	OrthoPerovskite_GdFeO3	-1.9551408	train	-1.8362210988998413	-1.9177677278352672	Eu	Pd	5.415557	5.659457	7.7472330000000005	90.0	90.0	90.0	orthorhombic	orthorhombic	0	0
581	EuPdO3	681427	Pd	Eu	-1.4980994909999998	OrthoPerovskite_GdFeO3	-1.6003197	train	-1.5978435277938845	-1.5433453305147058			5.834212	5.85586	7.853621	90.0	90.0	90.0	tetragonal	other	4	4
582	EuPtO3	682040	Eu	Pt	-1.9644486909999999	OrthoPerovskite_GdFeO3	-1.9640341000000001	test	-1.9265155792236328	-1.9271523182840622	Eu	Pt	5.411418	5.712224	7.764692	90.0	90.0	90.0	orthorhombic	orthorhombic	0	0
583	EuPtO3	682041	Pt	Eu	-1.558849467	OrthoPerovskite_GdFeO3	-1.6380306	test	-1.6492264270782468	-1.583139484760651			5.224964	5.700022	8.986373	90.0	90.0	90.0	orthorhombic	other	5	5
584	EuPuO3	682290	Eu	Pu	-3.50167889	OrthoPerovskite_GdFeO3	-3.3261142	test	-3.4316391944885254	-3.3644774840778386	Eu	Pu	5.846315	6.070652	8.419834	90.0	90.0	90.0	orthorhombic	orthorhombic	0	1
585	EuPuO3	682291	Pu	Eu	-3.26885529	OrthoPerovskite_GdFeO3	-3.1684334	test	-3.231874942779541	-3.198085961286708			6.0361400000000005	6.270683	8.014667	90.0	90.0	90.0	orthorhombic	other	3	3
586	EuReO3	682746	Eu	Re	-2.449908736	OrthoPerovskite_GdFeO3	-2.5557928	test	-2.3674473762512207	-2.5516014028771115	Eu	Re	5.457921	5.5802	7.7781649999999996	90.0	90.0	90.0	orthorhombic	orthorhombic	0	0
587	EuReO3	682747	Re	Eu	-2.082046424	OrthoPerovskite_GdFeO3	-2.1253946	test	-2.0033726692199707	-2.097426817863835			5.118915	6.391977	8.206857000000001	90.0	90.0	90.0	orthorhombic	other	5	5
588	EuRhO3	681482	Rh	Eu	-1.725947137	OrthoPerovskite_GdFeO3	-1.7759898999999997	train	-1.7742336988449097	-1.7287200374354112			5.698937	5.881469999999999	7.9614970000000005	90.0	90.0	90.0	orthorhombic	other	3	4
589	EuRuO3	681895	Ru	Eu	-1.8731636440000001	OrthoPerovskite_GdFeO3	-1.8856069	train	-1.9275571107864382	-1.8443925831974533			5.544354	5.788776	8.417969	90.0	90.0	90.0	orthorhombic	other	4	4
590	EuSbO3	682380	Eu	Sb	-2.433725409	OrthoPerovskite_GdFeO3	-2.477061	train	-2.424884080886841	-2.4685202408454203	Eu	Sb	5.676126999999999	5.893128	8.141729	90.0	90.0	90.0	orthorhombic	orthorhombic	0	0
591	EuSbO3	682381	Sb	Eu	-2.2929737919999997	OrthoPerovskite_GdFeO3	-2.2498736	train	-2.2326245307922363	-2.2287823815438585			5.830425	6.038691	8.644849	90.0	90.0	90.0	orthorhombic	other	4	4
592	EuScO3	681758	Eu	Sc	-3.238213183	OrthoPerovskite_GdFeO3	-3.1493874	train	-3.407139778137207	-3.1779878076555756	Eu	Sc	5.566636	5.785606	7.953880000000001	90.0	90.0	90.0	orthorhombic	orthorhombic	0	1
593	EuScO3	681759	Sc	Eu	-3.09892105	OrthoPerovskite_GdFeO3	-3.1180172	train	-3.2052288055419917	-3.14488463118601			5.821979	6.059226	8.06579	90.0	90.0	90.0	orthorhombic	other	4	3
594	EuSiO3	681375	Si	Eu	-3.284112882	OrthoPerovskite_GdFeO3	-3.2109973	test	-2.8274233341217037	-3.243001208653092			4.560094	5.028759	10.3719	90.0	90.0	90.0	orthorhombic	other	0	0
595	EuSnO3	681696	Eu	Sn	-2.701242768	OrthoPerovskite_GdFeO3	-2.6915257	train	-2.6024727821350098	-2.694832563068183	Eu	Sn	5.586861	5.7156400000000005	7.988699	90.0	90.0	90.0	orthorhombic	orthorhombic	0	0
596	EuSnO3	681697	Sn	Eu	-2.389205257	OrthoPerovskite_GdFeO3	-2.4157362	train	-2.4089834690093994	-2.4038076895591414			5.706943	5.783365	8.960766	90.0	90.0	90.0	orthorhombic	other	4	4
597	EuTaO3	681784	Eu	Ta	-3.311310528	OrthoPerovskite_GdFeO3	-3.1973262000000005	train	-3.1669340133666988	-3.228574879339506	Eu	Ta	5.561043	5.642798	7.947508999999999	90.0	90.0	90.0	orthorhombic	orthorhombic	0	1
598	EuTaO3	681785	Ta	Eu	-2.954720198	OrthoPerovskite_GdFeO3	-2.9749331000000003	train	-2.962931632995605	-2.993896170408297			5.6001129999999995	6.202193	8.06067	90.0	90.0	90.0	orthorhombic	other	4	4
599	EuTbO3	693195	Eu	Tb	-3.022701645	OrthoPerovskite_GdFeO3	-3.008755	test	-3.1485505104064937	-3.029586485555666			5.906953	6.100226	8.269456	90.0	90.0	90.0	orthorhombic	other	0	1
600	EuTcO3	681980	Eu	Tc	-2.5287220059999997	OrthoPerovskite_GdFeO3	-2.501569	test	-2.43511176109314	-2.494382130438605	Eu	Tc	5.445522	5.551782	7.753788	90.0	90.0	90.0	orthorhombic	orthorhombic	0	0
601	EuTcO3	681981	Tc	Eu	-2.163953341	OrthoPerovskite_GdFeO3	-2.2935133	test	-2.183675527572632	-2.2748328590728164			5.25005	6.139614	8.438331	90.0	90.0	90.0	orthorhombic	other	5	4
602	EuTeO3	681948	Eu	Te	-2.1966653469999997	OrthoPerovskite_GdFeO3	-2.284478	train	-2.248631715774536	-2.265298424151921	Eu	Te	5.717518	6.00096	8.243838	90.0	90.0	90.0	orthorhombic	orthorhombic	1	1
603	EuTeO3	681949	Te	Eu	-2.343033807	OrthoPerovskite_GdFeO3	-2.3526611	train	-2.1798372268676762	-2.337248146867813			5.827287	6.439399	8.377171	90.0	90.0	90.0	orthorhombic	other	0	0
604	EuThO3	693544	Eu	Th	-3.803442496	OrthoPerovskite_GdFeO3	-3.5391922	test	-3.4071922302246094	-3.589326501163549	Eu	Th	6.016846	6.238621	8.697144999999999	90.0	90.0	90.0	orthorhombic	orthorhombic	0	1
605	EuTiO3	682312	Eu	Ti	-3.5581139360000003	OrthoPerovskite_GdFeO3	-3.4412724999999997	train	-3.301487445831299	-3.4859974465529007	Eu	Ti	5.442601	5.458079	7.696625	90.0	90.0	90.0	tetragonal	tetragonal	0	0
606	EuTiO3	682313	Ti	Eu	-3.325536875	OrthoPerovskite_GdFeO3	-3.2186944	train	-3.2431871891021733	-3.251123517710857			5.5250900000000005	5.633412	9.039363999999999	90.0	90.0	90.0	orthorhombic	other	4	4
607	EuTlO3	681557	Eu	Tl	-1.755618788	OrthoPerovskite_GdFeO3	-1.7717096999999997	train	-1.8697570562362669	-1.724203387368627	Eu	Tl	5.709493	6.093474	8.143714	90.0	90.0	90.0	orthorhombic	orthorhombic	0	2
608	EuTlO3	681558	Tl	Eu	-1.667338629	OrthoPerovskite_GdFeO3	-1.813797	train	-1.6321637630462646	-1.768615706034991			6.101088	6.138064	8.127266	90.0	90.0	90.0	orthorhombic	other	2	0
609	EuTmO3	682908	Eu	Tm	-3.234231297	OrthoPerovskite_GdFeO3	-3.1016993999999998	train	-3.3521175384521484	-3.1276653908561713			5.803062000000001	5.999884	8.181063	90.0	90.0	90.0	orthorhombic	other	0	4
610	EuTmO3	682909	Tm	Eu	-3.1194739260000004	OrthoPerovskite_GdFeO3	-3.1567872	train	-3.2236483097076416	-3.185796393040415			5.614913	5.729285	9.301389	90.0	90.0	90.0	orthorhombic	other	2	1
611	EuVO3	681632	Eu	V	-3.09988271	OrthoPerovskite_GdFeO3	-2.9441092	test	-2.9833872318267822	-2.9613694730592126	Eu	V	5.360818	5.369433	7.6888559999999995	90.0	90.0	90.0	tetragonal	tetragonal	0	3
612	EuVO3	681633	V	Eu	-2.8030393680000003	OrthoPerovskite_GdFeO3	-2.890342	test	-2.883328914642334	-2.904632024465501			5.616743	5.638893	8.652708	90.0	90.0	90.0	tetragonal	other	5	4
613	EuWO3	681414	Eu	W	-2.797171207	OrthoPerovskite_GdFeO3	-2.7583961	train	-2.7531046867370605	-2.7653970686113563	Eu	W	5.503465	5.595458	7.854457000000001	90.0	90.0	90.0	orthorhombic	orthorhombic	0	1
614	EuWO3	681415	W	Eu	-2.423298973	OrthoPerovskite_GdFeO3	-2.4125902999999997	train	-2.4917025566101074	-2.4004880013564645			5.294225	6.338107	8.136814999999999	90.0	90.0	90.0	orthorhombic	other	5	5
615	EuYO3	693196	Eu	Y	-3.1533085069999998	OrthoPerovskite_GdFeO3	-3.1241738999999997	test	-3.2061033248901367	-3.1513814442943153			5.930901	6.133768	8.121919	90.0	90.0	90.0	orthorhombic	other	0	0
616	EuZnO3	682028	Eu	Zn	-1.907666681	OrthoPerovskite_GdFeO3	-2.0177313999999997	train	-1.983137845993042	-1.9838160054087606	Eu	Zn	5.307104	5.547331	7.654036	90.0	90.0	90.0	orthorhombic	orthorhombic	2	2
617	EuZnO3	682029	Zn	Eu	-1.9418287619999999	OrthoPerovskite_GdFeO3	-1.9647126	train	-2.0065751075744633	-1.9278683004975834			5.883847	6.0376	7.287166	90.0	90.0	90.0	orthorhombic	other	0	4
618	EuZrO3	682176	Eu	Zr	-3.690516285	OrthoPerovskite_GdFeO3	-3.5843667999999997	train	-3.585218906402588	-3.6369966708067785	Eu	Zr	5.661348	5.8094470000000005	8.086899	90.0	90.0	90.0	orthorhombic	orthorhombic	0	1
619	EuZrO3	682177	Zr	Eu	-3.4077803789999996	OrthoPerovskite_GdFeO3	-3.4014822999999996	train	-3.2900257110595703	-3.4440091260334484			5.803113	5.9042010000000005	8.466223	90.0	90.0	90.0	orthorhombic	other	4	3
620	FeAgO3	682474	Fe	Ag	-0.777903295	OrthoPerovskite_GdFeO3	-0.7671838000000001	train	-0.8358185291290283	-0.6641847028862373			5.104851	5.260439	8.426601	90.0	90.0	90.0	orthorhombic	other	1	2
621	FeAgO3	682475	Ag	Fe	-0.8166351140000001	OrthoPerovskite_GdFeO3	-0.7967082	train	-0.9098321199417114	-0.6953401122670524			3.612488	5.451289	5.474063	90.0	90.0	90.0	tetragonal	other	0	1
622	FeBiO3	682184	Bi	Fe	-1.5524201830000002	OrthoPerovskite_GdFeO3	-1.6263083999999999	train	-1.417864203453064	-1.5707697180645015	Bi	Fe	5.446818	5.674988	7.807608999999999	90.0	90.0	90.0	orthorhombic	orthorhombic	0	0
623	FeBiO3	682185	Fe	Bi	-1.3445953780000002	OrthoPerovskite_GdFeO3	-1.4313211000000001	train	-1.2385879755020142	-1.3650107812000833			5.643249	5.652168	8.183616	90.0	90.0	90.0	tetragonal	other	4	3
624	FeHgO3	682332	Fe	Hg	-0.811812577	OrthoPerovskite_GdFeO3	-0.9693276	test	-0.9360688924789428	-0.8774954845716784			5.32154	5.442035	8.718357000000001	90.0	90.0	90.0	orthorhombic	other	2	0
625	FeHgO3	682333	Hg	Fe	-0.880270144	OrthoPerovskite_GdFeO3	-0.92293996	test	-0.9458647966384888	-0.8285452632493187	Hg	Fe	5.3702510000000006	5.4375	7.638877000000001	90.0	90.0	90.0	orthorhombic	orthorhombic	0	2
626	FePbO3	681618	Pb	Fe	-1.3586669409999999	OrthoPerovskite_GdFeO3	-1.523348	train	-1.3430650234222412	-1.462121501267124	Pb	Fe	5.419664	5.599304	7.768324000000001	90.0	90.0	90.0	orthorhombic	orthorhombic	0	0
627	FeSbO3	693548	Sb	Fe	-1.488206141	OrthoPerovskite_GdFeO3	-1.6448696	train	-1.5485686063766482	-1.5903562900049708	Sb	Fe	5.312504	5.694168	7.661089	90.0	90.0	90.0	orthorhombic	orthorhombic	1	0
628	FeTcO3	693328	Fe	Tc	-1.4752463319999998	OrthoPerovskite_GdFeO3	-1.6575872	test	-1.4516433477401731	-1.6037764453456875	Fe	Tc	5.134533	5.373309	7.5430399999999995	90.0	90.0	90.0	orthorhombic	orthorhombic	0	0
629	GaAgO3	682458	Ga	Ag	-0.976069779	OrthoPerovskite_GdFeO3	-0.98653275	train	-0.9615127444267272	-0.8956510945657284			5.138683	5.195475	8.455376	90.0	90.0	90.0	orthorhombic	other	0	0
630	GaAgO3	682459	Ag	Ga	-0.926971942	OrthoPerovskite_GdFeO3	-0.8133348000000001	train	-0.8541488647460938	-0.7128852115615705			5.129857	5.419015	7.627569	90.0	90.0	90.0	orthorhombic	other	1	2
631	GaBiO3	681840	Bi	Ga	-1.728245885	OrthoPerovskite_GdFeO3	-1.7534946	test	-1.5112063884735107	-1.7049820349478335	Bi	Ga	5.426680999999999	5.620758	7.761056	90.0	90.0	90.0	orthorhombic	orthorhombic	1	0
632	GaBiO3	681841	Ga	Bi	-1.645335636	OrthoPerovskite_GdFeO3	-1.6354351	test	-1.613503098487854	-1.5804006021737769			5.372885	6.1588959999999995	9.071197999999999	90.0	90.0	90.0	orthorhombic	other	3	3
633	GaHgO3	693298	Hg	Ga	-1.003499394	OrthoPerovskite_GdFeO3	-1.1269805	train	-0.9399831295013428	-1.0438575660897695			5.29681	5.496258999999999	7.824102000000001	90.0	90.0	90.0	orthorhombic	other	0	0
634	GaMoO3	693047	Ga	Mo	-1.640837074	OrthoPerovskite_GdFeO3	-1.8679965	train	-1.7781169414520264	-1.825809336074399			5.167078	5.500967	7.489563	90.0	90.0	90.0	orthorhombic	other	3	0
635	GaPbO3	682697	Pb	Ga	-1.532222859	OrthoPerovskite_GdFeO3	-1.6650265	train	-1.449627161026001	-1.6116267128195971	Pb	Ga	5.417951	5.594868	7.732419	90.0	90.0	90.0	orthorhombic	orthorhombic	0	0
636	GaReO3	693304	Ga	Re	-1.347167046	OrthoPerovskite_GdFeO3	-1.3754392	train	-1.277632474899292	-1.3060418107391158			4.951294	5.497887	7.4487429999999994	90.0	90.0	90.0	orthorhombic	other	3	3
637	GaSbO3	693367	Sb	Ga	-1.6460911390000001	OrthoPerovskite_GdFeO3	-1.7057527	train	-1.5914137363433838	-1.6546027405635972	Sb	Ga	5.278731	5.674671	7.653322999999999	90.0	90.0	90.0	orthorhombic	orthorhombic	1	1
638	GaTcO3	693466	Ga	Tc	-1.4815764669999998	OrthoPerovskite_GdFeO3	-1.5899248	train	-1.6318641901016235	-1.5323761875355888			5.184086	5.213647	7.647875999999999	90.0	90.0	90.0	orthorhombic	other	1	1
639	GaWO3	681704	W	Ga	-1.472624119	OrthoPerovskite_GdFeO3	-1.5961536	train	-1.765272855758667	-1.5389490836469824			4.690095999999999	5.553232	5.62219581	119.59505528	114.65197109	90.0	error	other	5	4
640	GaWO3	681705	Ga	W	-1.836446536	OrthoPerovskite_GdFeO3	-1.8609378	train	-1.7694799900054932	-1.8183606939954284	Ga	W	3.9274824999999995	3.92935069	3.92935069	90.23850657	90.00000638	89.99999362	cubic	cubic	3	1
641	GdAlO3	681571	Gd	Al	-3.5694534589999996	OrthoPerovskite_GdFeO3	-3.465356	train	-3.7183778285980233	-3.511411385593927	Gd	Al	5.220571	5.33255	7.428083999999999	90.0	90.0	90.0	orthorhombic	orthorhombic	0	1
642	GdAlO3	681572	Al	Gd	-3.309560863	OrthoPerovskite_GdFeO3	-3.252787	train	-3.3744492530822754	-3.2870994870737023			5.398478	5.412208000000001	8.443796	90.0	90.0	90.0	tetragonal	other	5	5
643	GdBeO3	682800	Be	Gd	-2.8732156289999997	OrthoPerovskite_GdFeO3	-2.7863037999999998	train	-2.752915143966675	-2.7948464670200273			4.740856	5.537429	8.056277	90.0	90.0	90.0	orthorhombic	other	0	1
644	GdBeO3	682801	Gd	Be	-2.741440135	OrthoPerovskite_GdFeO3	-2.7424180000000002	train	-2.955776691436768	-2.7485362942475215	Gd	Be	3.5552894999999998	3.57262955	3.57262955	90.61877950000002	90.0	90.0	cubic	cubic	2	3
645	GdCrO3	681475	Cr	Gd	-2.835992475	OrthoPerovskite_GdFeO3	-2.8577122999999998	train	-2.800479888916016	-2.8701997697381163			5.523798	5.640756	8.170192	90.0	90.0	90.0	orthorhombic	other	5	4
646	GdCrO3	681476	Gd	Cr	-3.185264685	OrthoPerovskite_GdFeO3	-3.1466265	train	-3.0961823463439937	-3.1750743879159873	Gd	Cr	5.307212	5.585111	7.625259	90.0	90.0	90.0	orthorhombic	orthorhombic	0	0
647	GdCuO3	681720	Gd	Cu	-2.263421218	OrthoPerovskite_GdFeO3	-2.2713375	train	-2.4716830253601074	-2.251432006647464	Gd	Cu	5.250764	5.8604769999999995	7.265186	90.0	90.0	90.0	orthorhombic	orthorhombic	0	0
648	GdCuO3	681721	Cu	Gd	-1.974717791	OrthoPerovskite_GdFeO3	-2.0031705	train	-2.0758273601531982	-1.9684507210861968			5.550784999999999	5.599886	8.064981	90.0	90.0	90.0	orthorhombic	other	5	5
649	GdFeO3	681830	Gd	Fe	-2.7658296239999998	OrthoPerovskite_GdFeO3	-2.7753754	train	-2.8647119998931885	-2.783314352027774	Gd	Fe	5.330048000000001	5.614186	7.645607000000001	90.0	90.0	90.0	orthorhombic	orthorhombic	0	0
650	GdFeO3	681831	Fe	Gd	-2.58723331	OrthoPerovskite_GdFeO3	-2.5530524	train	-2.5804591178894043	-2.5487096156141296			5.531708	5.564518	8.368897	90.0	90.0	90.0	orthorhombic	other	3	3
651	GdGaO3	681952	Gd	Ga	-2.953959708	OrthoPerovskite_GdFeO3	-2.9697032	test	-3.095001697540283	-2.988377356291135	Gd	Ga	5.305362000000001	5.571385	7.608210000000001	90.0	90.0	90.0	orthorhombic	orthorhombic	0	0
652	GdGaO3	681953	Ga	Gd	-2.785690612	OrthoPerovskite_GdFeO3	-2.7733772	test	-2.867791175842285	-2.7812057659422056			5.5073669999999995	5.5373	8.428521	90.0	90.0	90.0	orthorhombic	other	4	3
653	GdHfO3	693457	Gd	Hf	-3.433166069	OrthoPerovskite_GdFeO3	-3.265231	test	-3.308236837387085	-3.3002309279949356	Gd	Hf	5.492156	6.076280000000001	7.575968	90.0	90.0	90.0	orthorhombic	orthorhombic	0	2
654	GdMgO3	693347	Gd	Mg	-2.909917842	OrthoPerovskite_GdFeO3	-2.9424458	train	-3.0162582397460938	-2.959614182250117	Gd	Mg	5.3467769999999994	5.7316970000000005	7.5576740000000004	90.0	90.0	90.0	orthorhombic	orthorhombic	0	0
655	GdMnO3	681960	Gd	Mn	-2.944285823	OrthoPerovskite_GdFeO3	-2.9198282000000004	train	-3.008333683013916	-2.935747123572836	Gd	Mn	5.31944	5.739515	7.527428	90.0	90.0	90.0	orthorhombic	orthorhombic	0	0
656	GdMnO3	681961	Mn	Gd	-2.666913099	OrthoPerovskite_GdFeO3	-2.5796474999999996	train	-2.7214956283569336	-2.576773902374359			5.660661	5.680236	7.989294999999999	90.0	90.0	90.0	tetragonal	other	4	3
657	GdNiO3	681567	Ni	Gd	-2.097400241	OrthoPerovskite_GdFeO3	-2.1250217	test	-1.99009370803833	-2.0970333178381577			5.675523	5.693409	7.826407000000001	90.0	90.0	90.0	tetragonal	other	4	4
658	GdNiO3	681568	Gd	Ni	-2.389843311	OrthoPerovskite_GdFeO3	-2.4105072	test	-2.5150537490844727	-2.398289825160465	Gd	Ni	5.215546	5.504939	7.45907	90.0	90.0	90.0	orthorhombic	orthorhombic	0	0
659	GdPbO3	693499	Pb	Gd	-2.3873350380000002	OrthoPerovskite_GdFeO3	-2.4175812999999997	train	-2.3354744911193848	-2.405754717977959			5.837801	6.084798999999999	8.535774	90.0	90.0	90.0	orthorhombic	other	0	0
660	GdPdO3	693437	Gd	Pd	-2.194319321	OrthoPerovskite_GdFeO3	-2.232063	train	-2.2739040851593018	-2.2099878748199986	Gd	Pd	5.4230730000000005	5.910645	7.557863	90.0	90.0	90.0	orthorhombic	orthorhombic	0	0
661	GdRhO3	693421	Gd	Rh	-2.407822929	OrthoPerovskite_GdFeO3	-2.4500325000000003	test	-2.318563222885132	-2.4399986118724573	Gd	Rh	5.290653	5.786931	7.654116	90.0	90.0	90.0	orthorhombic	orthorhombic	0	0
662	GdScO3	693353	Gd	Sc	-3.788675441	OrthoPerovskite_GdFeO3	-3.4710332999999998	train	-3.7588002681732178	-3.51740231532248	Gd	Sc	5.462005	5.744498999999999	7.903455	90.0	90.0	90.0	orthorhombic	orthorhombic	0	1
663	GdTiO3	681710	Gd	Ti	-3.449660048	OrthoPerovskite_GdFeO3	-3.3937687999999993	train	-3.4341554641723637	-3.435869510994398	Gd	Ti	5.340654	5.686552	7.674886999999999	90.0	90.0	90.0	orthorhombic	orthorhombic	0	0
664	GdTiO3	681711	Ti	Gd	-3.202628411	OrthoPerovskite_GdFeO3	-3.010389	train	-3.1738159656524663	-3.03131075222758			5.645742	5.6656830000000005	8.07271	90.0	90.0	90.0	tetragonal	other	4	5
665	GdTlO3	682562	Tl	Gd	-2.2609626	OrthoPerovskite_GdFeO3	-2.253519	train	-2.2310285568237305	-2.232629163505789			5.8256120000000005	5.908241	8.517225999999999	90.0	90.0	90.0	orthorhombic	other	1	2
666	GdTlO3	682563	Gd	Tl	-2.271184096	OrthoPerovskite_GdFeO3	-2.2649446	train	-2.265705347061157	-2.2446859451989467			5.626367	5.984321	8.457794	90.0	90.0	90.0	orthorhombic	other	0	1
667	GdVO3	693189	Gd	V	-3.2550977889999997	OrthoPerovskite_GdFeO3	-3.2122145	train	-3.157515048980713	-3.244285650142109	Gd	V	5.335567	5.696986	7.649412	90.0	90.0	90.0	orthorhombic	orthorhombic	0	0
668	GdZnO3	693147	Gd	Zn	-2.434035188	OrthoPerovskite_GdFeO3	-2.4460203999999997	train	-2.6161153316497803	-2.4357648723899685	Gd	Zn	5.274030000000001	5.79218	7.520238000000001	90.0	90.0	90.0	orthorhombic	orthorhombic	0	0
669	Ge2O3	693190	Ge	Ge	-1.4316043840000001	OrthoPerovskite_GdFeO3	-1.4684371	train	-1.466977834701538	-1.4041771715273494			5.226787	5.289594	7.772766000000001	90.0	90.0	90.0	orthorhombic	other	1	1
670	GeBiO3	693276	Bi	Ge	-1.371569441	OrthoPerovskite_GdFeO3	-1.5568128	test	-1.320478439331055	-1.4974349892244445	Bi	Ge	5.505191	5.862694	7.939166999999999	90.0	90.0	90.0	orthorhombic	orthorhombic	1	0
671	GeMoO3	693257	Ge	Mo	-1.5552671390000001	OrthoPerovskite_GdFeO3	-1.6917748	train	-1.6112778186798096	-1.639852662770853			5.28259	5.683773	7.69552	90.0	90.0	90.0	orthorhombic	other	0	0
672	GePbO3	682071	Ge	Pb	-1.355664652	OrthoPerovskite_GdFeO3	-1.4399861999999999	train	-1.3049511909484863	-1.3741545652507563			5.828754	5.863986	8.891597	90.0	90.0	90.0	orthorhombic	other	4	4
673	GeWO3	693389	Ge	W	-1.53519001	OrthoPerovskite_GdFeO3	-1.6255264999999999	train	-1.6014368534088137	-1.569944623749465			5.182912	5.8449029999999995	7.656836	90.0	90.0	90.0	orthorhombic	other	1	1
674	HfAgO3	681904	Hf	Ag	-2.2563289159999997	OrthoPerovskite_GdFeO3	-2.2383826	train	-2.1905622482299805	-2.216656586974115			5.040083999999999	5.386096	9.548625999999999	90.0	90.0	90.0	orthorhombic	other	0	3
675	HfAgO3	681905	Ag	Hf	-2.239524486	OrthoPerovskite_GdFeO3	-2.2565169999999997	train	-2.1603717803955083	-2.235792781304074			5.375506	5.734854	7.95065	90.0	90.0	90.0	orthorhombic	other	1	0
676	HfBiO3	693121	Bi	Hf	-2.526920045	OrthoPerovskite_GdFeO3	-2.4998085	test	-2.5823206901550293	-2.4925243755573905	Bi	Hf	4.1639735	5.725176	5.769603	90.0	90.0	90.0	orthorhombic	orthorhombic	0	0
677	HfCdO3	681732	Hf	Cd	-2.5494799230000003	OrthoPerovskite_GdFeO3	-2.612828	train	-2.442683219909668	-2.6117873848146504			5.596977	5.762708	7.9431020000000006	90.0	90.0	90.0	orthorhombic	other	2	1
678	HfGeO3	693420	Ge	Hf	-2.659857921	OrthoPerovskite_GdFeO3	-2.6627218999999998	train	-2.5707685947418213	-2.664437561621138			5.4206	5.755724	7.86033	90.0	90.0	90.0	orthorhombic	other	0	1
679	HfHgO3	682258	Hf	Hg	-2.2280381069999997	OrthoPerovskite_GdFeO3	-2.3632977000000004	train	-2.1261856555938716	-2.348472342022329			5.257885	5.545309	9.339661999999999	90.0	90.0	90.0	orthorhombic	other	3	2
680	HfHgO3	682259	Hg	Hf	-2.401356428	OrthoPerovskite_GdFeO3	-2.3836925	train	-2.340897798538208	-2.3699938070898607	Hg	Hf	5.591353	5.726216	8.054018	90.0	90.0	90.0	orthorhombic	orthorhombic	1	1
681	HfInO3	693183	In	Hf	-2.650577105	OrthoPerovskite_GdFeO3	-2.5653841	test	-2.7684621810913086	-2.561722552773273	In	Hf	5.609868	5.7479949999999995	8.015576	90.0	90.0	90.0	orthorhombic	orthorhombic	0	3
682	HfMnO3	693331	Mn	Hf	-3.092642037	OrthoPerovskite_GdFeO3	-3.0516240000000003	test	-2.838472604751587	-3.0748236874885144	Mn	Hf	5.330819	5.551339	7.808686	90.0	90.0	90.0	orthorhombic	orthorhombic	0	0
683	HfNpO3	682890	Np	Hf	-3.36190627	OrthoPerovskite_GdFeO3	-3.2718203	test	-3.2960796356201167	-3.3071842391217667	Np	Hf	5.626604	5.9503260000000004	8.036452	90.0	90.0	90.0	orthorhombic	orthorhombic	0	0
684	HfNpO3	682891	Hf	Np	-3.2201315239999997	OrthoPerovskite_GdFeO3	-3.1438696	test	-3.1981928348541264	-3.1721651891474445			6.07236	6.381022	7.210147999999999	90.0	90.0	90.0	orthorhombic	other	3	3
685	HfPbO3	681454	Pb	Hf	-2.8236544969999997	OrthoPerovskite_GdFeO3	-2.7388875	train	-2.712943315505981	-2.744810759678861	Pb	Hf	5.759407	5.829104	8.192768	90.0	90.0	90.0	orthorhombic	orthorhombic	0	1
686	HfPbO3	681455	Hf	Pb	-2.51812407	OrthoPerovskite_GdFeO3	-2.5482162999999995	train	-2.542175054550171	-2.5436063560963555			5.783636	5.930887	9.530896	90.0	90.0	90.0	orthorhombic	other	3	3
687	HfSbO3	693565	Sb	Hf	-2.438342581	OrthoPerovskite_GdFeO3	-2.3719	train	-2.4160091876983643	-2.3575498568275943			5.67825	5.74958	8.207741	90.0	90.0	90.0	orthorhombic	other	0	3
688	HfSnO3	681752	Hf	Sn	-2.457522057	OrthoPerovskite_GdFeO3	-2.4534	test	-2.5981979370117188	-2.4435521418710304			5.841944	6.010286	8.533821000000001	90.0	90.0	90.0	orthorhombic	other	4	4
689	HfSnO3	681753	Sn	Hf	-2.783121667	OrthoPerovskite_GdFeO3	-2.7386825	test	-2.6395654678344727	-2.7445944349128			5.796716	5.820778	8.213543	90.0	90.0	90.0	tetragonal	other	0	2
690	HfTlO3	682400	Tl	Hf	-2.504243226	OrthoPerovskite_GdFeO3	-2.5826519	test	-2.5887606143951416	-2.5799442737263165	Tl	Hf	5.706383	5.819878	8.132705999999999	90.0	90.0	90.0	orthorhombic	orthorhombic	0	3
691	HfTlO3	682401	Hf	Tl	-2.226436788	OrthoPerovskite_GdFeO3	-2.1963377	test	-2.192901134490967	-2.172289010600829			6.018932	6.042692	8.043488	90.0	90.0	90.0	tetragonal	other	4	4
692	HfUO3	682264	U	Hf	-3.25045409	OrthoPerovskite_GdFeO3	-3.2426630000000003	train	-3.0910255908966064	-3.2764162093586138	U	Hf	5.628555	5.974089	8.066642	90.0	90.0	90.0	orthorhombic	orthorhombic	0	0
693	HfUO3	682265	Hf	U	-3.127817176	OrthoPerovskite_GdFeO3	-3.1038647	train	-3.004249095916748	-3.129950308007148			6.014694	6.444619	7.303230999999999	90.0	90.0	90.0	orthorhombic	other	3	1
694	HgAsO3	693444	Hg	As	-0.830959039	OrthoPerovskite_GdFeO3	-0.9836050999999999	train	-0.9167150259017944	-0.8925617130956988			5.455242	5.50979882	5.50979882	60.59939280999999	60.32701127	60.32701127	triclinic	other	1	1
695	HgAuO3	693395	Hg	Au	-0.172105201	OrthoPerovskite_GdFeO3	-0.34911835	train	-0.09687542915344237	-0.22302416303700248	Hg	Au	5.580479	5.691028	8.074563000000001	90.0	90.0	90.0	orthorhombic	orthorhombic	0	1
696	HgBiO3	682534	Bi	Hg	-0.821022867	OrthoPerovskite_GdFeO3	-0.883725	train	-0.8550020456314087	-0.7871639605758588			5.629561	5.982621	8.982733	90.0	90.0	90.0	orthorhombic	other	2	3
697	HgBiO3	682535	Hg	Bi	-0.9042785959999999	OrthoPerovskite_GdFeO3	-0.94529575	train	-0.7845150232315063	-0.8521360488192721			5.857744	5.907158	8.442949	90.0	90.0	90.0	orthorhombic	other	1	1
698	HgGeO3	693123	Hg	Ge	-1.161435135	OrthoPerovskite_GdFeO3	-1.3396126	train	-1.1719584465026855	-1.2682360504282302	Hg	Ge	5.345539	5.371487	7.605229	90.0	90.0	90.0	tetragonal	tetragonal	1	0
699	HgIrO3	693239	Hg	Ir	-0.605915401	OrthoPerovskite_GdFeO3	-0.70445627	train	-0.5873972177505493	-0.597991930921443	Hg	Ir	5.48491	5.529888	7.860473	90.0	90.0	90.0	orthorhombic	orthorhombic	1	1
700	HgMoO3	693095	Hg	Mo	-1.401226823	OrthoPerovskite_GdFeO3	-1.3904376	train	-1.274982452392578	-1.3218687637697353	Hg	Mo	3.95613869	3.95613869	3.956542	90.0	90.0	90.79751285	cubic	cubic	1	2
701	HgOsO3	693054	Hg	Os	-0.705455605	OrthoPerovskite_GdFeO3	-0.7952741	train	-0.7179337739944458	-0.6938267886231163	Hg	Os	5.466862	5.578156	7.747547	90.0	90.0	90.0	orthorhombic	orthorhombic	1	1
702	HgPbO3	693324	Hg	Pb	-0.812652032	OrthoPerovskite_GdFeO3	-0.9904228	train	-0.6904042959213257	-0.8997560416692038			5.774425	5.81574	8.351129	90.0	90.0	90.0	orthorhombic	other	0	0
703	HgPbO3	693517	Pb	Hg	-0.748981441	OrthoPerovskite_GdFeO3	-0.84952384	train	-0.635154128074646	-0.7510734340588505			5.4805470000000005	5.721092	9.438635000000001	90.0	90.0	90.0	orthorhombic	other	2	2
704	HgPdO3	682781	Pd	Hg	-0.193497532	OrthoPerovskite_GdFeO3	-0.5744442	test	-0.2407926321029663	-0.46079763517632344			5.3770620000000005	5.586638	8.481057	90.0	90.0	90.0	orthorhombic	other	3	2
705	HgPdO3	682782	Hg	Pd	-0.43843409899999997	OrthoPerovskite_GdFeO3	-0.6510908000000001	test	-0.3141661882400513	-0.5416784050022164			5.486413	5.598507	7.839902	90.0	90.0	90.0	orthorhombic	other	0	0
706	HgPtO3	693415	Hg	Pt	-0.5059418489999999	OrthoPerovskite_GdFeO3	-0.6822732	train	-0.4905071258544922	-0.5745834068812159			5.527778	5.599880000000001	7.8467009999999995	90.0	90.0	90.0	orthorhombic	other	0	1
707	HgRhO3	693296	Hg	Rh	-0.6238440829999999	OrthoPerovskite_GdFeO3	-0.7134894	train	-0.5303074121475221	-0.6075240759655464	Hg	Rh	5.495515	5.499426000000001	7.811408999999999	90.0	90.0	90.0	tetragonal	tetragonal	1	1
708	HgRuO3	693051	Hg	Ru	-0.7648979309999999	OrthoPerovskite_GdFeO3	-0.8796573000000001	train	-0.8412168025970459	-0.7828715495958444			5.506547	5.525665	7.747371	90.0	90.0	90.0	tetragonal	other	1	0
709	HgSbO3	682152	Sb	Hg	-0.9446304329999999	OrthoPerovskite_GdFeO3	-0.981083	train	-1.0378814935684204	-0.8899002853275019			5.5758209999999995	5.990986	8.751996	90.0	90.0	90.0	orthorhombic	other	4	5
710	HgSbO3	682153	Hg	Sb	-1.056611346	OrthoPerovskite_GdFeO3	-1.0740579	train	-1.0548460483551023	-0.9880113755322261	Hg	Sb	5.69449	5.770703	8.207305999999999	90.0	90.0	90.0	orthorhombic	orthorhombic	0	2
711	HgTeO3	682124	Te	Hg	-0.9659275270000001	OrthoPerovskite_GdFeO3	-0.9983037	train	-0.9299597740173341	-0.9080723043464899			6.004928	6.231775	8.336361	90.0	90.0	90.0	orthorhombic	other	0	0
712	HgTeO3	682125	Hg	Te	-0.81304668	OrthoPerovskite_GdFeO3	-0.9667606	train	-0.8666692972183228	-0.8747866764035005	Hg	Te	5.765434	5.856618	8.31514	90.0	90.0	90.0	orthorhombic	orthorhombic	1	1
713	HgWO3	693348	Hg	W	-1.518917881	OrthoPerovskite_GdFeO3	-1.5137602	train	-1.4308292865753174	-1.4520040447206275	Hg	W	3.9584309999999996	3.96651862	3.96651862	90.74777618	90.0	90.0	cubic	cubic	1	2
714	HoAlO3	682050	Al	Ho	-3.349330043	OrthoPerovskite_GdFeO3	-3.1342897	test	-3.351020097732544	-3.162056069018762			5.344977	5.350393	8.324084	90.0	90.0	90.0	tetragonal	other	5	5
715	HoAlO3	682051	Ho	Al	-3.5948814560000004	OrthoPerovskite_GdFeO3	-3.5287040000000003	test	-3.701509952545166	-3.578258904034806	Ho	Al	5.1485080000000005	5.34503	7.360188000000001	90.0	90.0	90.0	orthorhombic	orthorhombic	0	0
716	HoCoO3	681824	Co	Ho	-2.266607203	OrthoPerovskite_GdFeO3	-2.2809231	train	-2.362667322158813	-2.2615471416598854			5.4319809999999995	5.487376	8.269908000000001	90.0	90.0	90.0	orthorhombic	other	5	4
717	HoCoO3	681825	Ho	Co	-2.540498736	OrthoPerovskite_GdFeO3	-2.4873097	train	-2.628012657165528	-2.47933510733284	Ho	Co	5.157815	5.552551	7.449647	90.0	90.0	90.0	orthorhombic	orthorhombic	0	0
718	HoCrO3	693075	Ho	Cr	-3.2105213530000003	OrthoPerovskite_GdFeO3	-3.2107852	train	-3.11386775970459	-3.2427773916634273	Ho	Cr	5.2469779999999995	5.5607489999999995	7.561324000000001	90.0	90.0	90.0	orthorhombic	orthorhombic	0	0
719	HoCuO3	682888	Ho	Cu	-2.2877606790000002	OrthoPerovskite_GdFeO3	-2.258485	test	-2.524319648742676	-2.237869499058252	Ho	Cu	5.195353	5.840159	7.162844000000001	90.0	90.0	90.0	orthorhombic	orthorhombic	0	0
720	HoCuO3	682889	Cu	Ho	-2.017367405	OrthoPerovskite_GdFeO3	-1.9421248	test	-2.133655548095703	-1.904032688054588			5.4483760000000006	5.557244	7.992013	90.0	90.0	90.0	orthorhombic	other	5	5
721	HoFeO3	693204	Ho	Fe	-2.7888516269999997	OrthoPerovskite_GdFeO3	-2.8324409999999998	train	-2.8484692573547363	-2.843532413345255	Ho	Fe	5.263656	5.5868459999999995	7.596639	90.0	90.0	90.0	orthorhombic	orthorhombic	0	0
722	HoGaO3	693111	Ho	Ga	-2.97767684	OrthoPerovskite_GdFeO3	-2.9222019	train	-3.0426526069641118	-2.9382519533152602	Ho	Ga	5.238969	5.54221	7.535562	90.0	90.0	90.0	orthorhombic	orthorhombic	0	0
723	HoMnO3	693197	Ho	Mn	-2.965224231	OrthoPerovskite_GdFeO3	-2.8394985	train	-3.014720916748047	-2.850979789132912	Ho	Mn	5.257032	5.7102059999999994	7.464219	90.0	90.0	90.0	orthorhombic	orthorhombic	0	0
724	HoNiO3	682242	Ni	Ho	-2.141699139	OrthoPerovskite_GdFeO3	-2.1560717	train	-2.0694851875305176	-2.129798605575565			5.616198000000001	5.625618	7.718462	90.0	90.0	90.0	tetragonal	other	3	4
725	HoNiO3	682243	Ho	Ni	-2.415145436	OrthoPerovskite_GdFeO3	-2.4100506	train	-2.5749943256378174	-2.3978080013156693	Ho	Ni	5.1432709999999995	5.516898	7.364775	90.0	90.0	90.0	orthorhombic	orthorhombic	0	0
726	HoPbO3	693380	Pb	Ho	-2.432897654	OrthoPerovskite_GdFeO3	-2.4490607000000004	train	-2.3701171875	-2.438973126957056			5.782004	6.04073	8.423014	90.0	90.0	90.0	orthorhombic	other	0	0
727	HoTlO3	682791	Tl	Ho	-2.311071858	OrthoPerovskite_GdFeO3	-2.359211	train	-2.264988899230957	-2.34415988142985			5.749731	5.847884	8.408126	90.0	90.0	90.0	orthorhombic	other	0	0
728	HoTlO3	682792	Ho	Tl	-2.287334613	OrthoPerovskite_GdFeO3	-2.3184638	train	-2.230685234069824	-2.3011616935878627			5.533623	5.895135	8.548534	90.0	90.0	90.0	orthorhombic	other	2	2
729	HoVO3	693390	Ho	V	-3.27571307	OrthoPerovskite_GdFeO3	-3.2725136000000004	test	-3.1484251022338867	-3.307915838928155	Ho	V	5.278334	5.640272	7.600052000000001	90.0	90.0	90.0	orthorhombic	orthorhombic	0	0
730	HoZnO3	693371	Ho	Zn	-2.45343057	OrthoPerovskite_GdFeO3	-2.3914225	test	-2.6249260902404785	-2.3781508336344714	Ho	Zn	5.227228	5.746415	7.442500999999999	90.0	90.0	90.0	orthorhombic	orthorhombic	0	0
731	In2O3	682630	In	In	-1.7377386559999999	OrthoPerovskite_GdFeO3	-1.7359996	train	-1.55634868144989	-1.6865205628394295			5.466604	5.603311	8.202944	90.0	90.0	90.0	orthorhombic	other	0	0
732	InBiO3	693453	Bi	In	-1.620765189	OrthoPerovskite_GdFeO3	-1.6141742000000001	train	-1.4396212100982666	-1.5579651913507093	Bi	In	5.644311	6.038723	8.143559	90.0	90.0	90.0	orthorhombic	orthorhombic	0	0
733	InGeO3	693329	In	Ge	-1.498612382	OrthoPerovskite_GdFeO3	-1.5553899	train	-1.5039993524551392	-1.4959334842994345			5.320056	5.507125	7.963466	90.0	90.0	90.0	orthorhombic	other	0	0
734	InPbO3	693236	Pb	In	-1.435986609	OrthoPerovskite_GdFeO3	-1.5170308000000001	train	-1.3381928205490112	-1.4554553216956347	Pb	In	5.671215	5.911614	8.235071000000001	90.0	90.0	90.0	orthorhombic	orthorhombic	0	0
735	InReO3	693079	In	Re	-1.3005201659999999	OrthoPerovskite_GdFeO3	-1.3069473999999999	test	-1.2719149589538574	-1.2337663345828207	In	Re	5.146438	5.676956	7.71243	90.0	90.0	90.0	orthorhombic	orthorhombic	3	2
736	InRuO3	693494	In	Ru	-1.298497438	OrthoPerovskite_GdFeO3	-1.3593034	train	-1.2301597595214844	-1.289014624591829	In	Ru	5.336917	5.443316	7.698908	90.0	90.0	90.0	orthorhombic	orthorhombic	0	0
737	InSnO3	693354	In	Sn	-1.574437071	OrthoPerovskite_GdFeO3	-1.5529605	train	-1.5640308856964111	-1.4933698775352071			5.602079	5.698275	8.322446000000001	90.0	90.0	90.0	orthorhombic	other	0	0
738	IrPbO3	681744	Pb	Ir	-1.015296444	OrthoPerovskite_GdFeO3	-1.0954573	train	-0.8812985420227051	-1.0105929374777296	Pb	Ir	5.538434	5.721431	7.871255000000001	90.0	90.0	90.0	orthorhombic	orthorhombic	0	2
739	IrPbO3	681745	Ir	Pb	-0.684931018	OrthoPerovskite_GdFeO3	-0.8948964	train	-0.7232588529586792	-0.7989524995591012			5.828343	5.926253	8.281156	90.0	90.0	90.0	orthorhombic	other	5	5
740	K2O3	682719	K	K	-0.8420140490000001	OrthoPerovskite_GdFeO3	-0.0064629019999999995	test	-0.6885648965835571	0.13856051807443925			6.609861	7.368681	7.873089	90.0	90.0	90.0	orthorhombic	other	0	1
741	KAcO3	682709	Ac	K	-1.973465251	OrthoPerovskite_GdFeO3	-2.0594797	test	-1.8701523542404173	-2.027870596779054			6.345724	6.4344209999999995	9.682457000000001	90.0	90.0	90.0	orthorhombic	other	4	3
742	KAcO3	682710	K	Ac	-2.055389654	OrthoPerovskite_GdFeO3	-2.0311407999999997	test	-2.0829420089721684	-1.997966177691723	K	Ac	6.348804	6.404116	9.000974000000001	90.0	90.0	90.0	orthorhombic	orthorhombic	1	5
743	KAgO3	693429	K	Ag	-0.312672529	OrthoPerovskite_GdFeO3	-0.48735327	train	-0.4161784648895264	-0.3688955617216242	K	Ag	5.643861	5.734825	8.354207	90.0	90.0	90.0	orthorhombic	orthorhombic	0	1
744	KAlO3	682681	K	Al	-1.8562634219999998	OrthoPerovskite_GdFeO3	-1.9210314999999998	train	-1.8197524547576904	-1.8817741359183087	K	Al	3.8123171	3.8123171	3.8131915000000003	90.0	90.0	89.98579144000001	cubic	cubic	4	3
745	KAlO3	682682	Al	K	-1.982300685	OrthoPerovskite_GdFeO3	-2.0565863	train	-2.1342015266418457	-2.024817357373598			5.623887	6.743098	7.463852	90.0	90.0	90.0	orthorhombic	other	0	0
746	KAsO3	682166	As	K	-1.726938347	OrthoPerovskite_GdFeO3	-1.8265656000000003	train	-1.49106764793396	-1.7820896787565328			4.836129	5.453681	11.448831	90.0	90.0	90.0	orthorhombic	other	0	0
747	KAsO3	682167	K	As	-1.3538357719999998	OrthoPerovskite_GdFeO3	-1.3327848999999998	train	-1.370939016342163	-1.2610311694271126	K	As	3.800814	3.80126076	3.80126076	89.98884096	90.0	90.0	cubic	cubic	4	4
748	KAuO3	682566	K	Au	-0.444003055	OrthoPerovskite_GdFeO3	-0.60255253	train	-0.33466267585754395	-0.4904587469401882	K	Au	5.637367	5.703202	8.225817999999999	90.0	90.0	90.0	orthorhombic	orthorhombic	0	0
749	KAuO3	682567	Au	K	-0.361060062	OrthoPerovskite_GdFeO3	-0.5105552	train	-0.347230076789856	-0.39337923040159795			6.188409	6.316653	9.684338	90.0	90.0	90.0	orthorhombic	other	4	3
750	KBiO3	682637	K	Bi	-1.35231163	OrthoPerovskite_GdFeO3	-1.38115	train	-1.279041767120361	-1.3120680911001719	K	Bi	5.9116040000000005	5.970415	8.412083	90.0	90.0	90.0	orthorhombic	orthorhombic	0	2
751	KBiO3	682638	Bi	K	-1.208947048	OrthoPerovskite_GdFeO3	-1.2784788999999999	train	-1.1564784049987793	-1.2037251560336295			4.630368	5.552891000000001	7.39130053	112.06368497	108.25405014000002	90.0	error	other	4	4
752	KCeO3	682802	K	Ce	-1.937787325	OrthoPerovskite_GdFeO3	-2.0123425	test	-2.033530712127685	-1.978129407692557	K	Ce	6.439465	6.46397	9.048364999999999	90.0	90.0	90.0	tetragonal	tetragonal	0	1
753	KCeO3	682803	Ce	K	-1.8968127559999999	OrthoPerovskite_GdFeO3	-2.0041580000000003	test	-1.7501710653305054	-1.9694927733129504			6.267334	6.3700529999999995	9.77183	90.0	90.0	90.0	orthorhombic	other	4	3
754	KCoO3	682552	K	Co	-0.83642648	OrthoPerovskite_GdFeO3	-0.8847961999999999	train	-0.8903342485427856	-0.7882943366217303	K	Co	3.7411845	5.595600000000001	5.5959330000000005	89.997854	90.0	90.0	tetragonal	tetragonal	4	3
755	KCoO3	682553	Co	K	-1.1045360990000002	OrthoPerovskite_GdFeO3	-1.1770828000000002	train	-1.0204442739486694	-1.0967276554877057			5.0942870000000005	5.784294999999999	10.217129	90.0	90.0	90.0	orthorhombic	other	0	0
756	KCrO3	693270	K	Cr	-1.671459408	OrthoPerovskite_GdFeO3	-1.6039312	test	-1.7290512323379517	-1.5471563397470292	K	Cr	3.80699821	3.80699821	3.8360305	90.0	90.0	90.00005321	tetragonal	tetragonal	1	1
757	KDyO3	682438	K	Dy	-2.1329220230000003	OrthoPerovskite_GdFeO3	-2.1600447	train	-2.1566052436828613	-2.133991085066087	K	Dy	6.167733	6.293652	8.811069	90.0	90.0	90.0	orthorhombic	orthorhombic	2	1
758	KErO3	693179	K	Er	-2.164783214	OrthoPerovskite_GdFeO3	-2.2026267	train	-2.267018795013428	-2.178925432326451	K	Er	6.041532	6.290774	8.728214999999999	90.0	90.0	90.0	orthorhombic	orthorhombic	3	1
759	KFeO3	681861	Fe	K	-1.295144354	OrthoPerovskite_GdFeO3	-1.2118536	test	-1.2410564422607422	-1.1334192904912432			5.400919	5.855988	10.008763	90.0	90.0	90.0	orthorhombic	other	0	2
760	KGaO3	682816	K	Ga	-1.2263411020000001	OrthoPerovskite_GdFeO3	-1.304893	train	-1.2293633222579956	-1.2315984438540695	K	Ga	3.94209806	3.94209806	3.948183	90.0	90.0	90.09811766	cubic	cubic	3	2
761	KGaO3	682817	Ga	K	-1.3862863230000002	OrthoPerovskite_GdFeO3	-1.4352285	train	-1.4018990993499756	-1.3691340367654663			5.730233999999999	6.759378999999999	7.859858	90.0	90.0	90.0	orthorhombic	other	0	0
762	KGdO3	682470	K	Gd	-2.093719491	OrthoPerovskite_GdFeO3	-2.1213658	train	-2.1784393787384038	-2.0931754558272337	K	Gd	6.2629980000000005	6.287376999999999	8.871004	90.0	90.0	90.0	tetragonal	tetragonal	1	3
763	KGdO3	682471	Gd	K	-2.02441353	OrthoPerovskite_GdFeO3	-2.1175097999999997	train	-1.9819073677062988	-2.0891064397397794			6.012359	6.054380999999999	10.052082	90.0	90.0	90.0	orthorhombic	other	4	4
764	KGeO3	682320	Ge	K	-1.6009491880000002	OrthoPerovskite_GdFeO3	-1.6514262999999998	test	-1.482784867286682	-1.5972752002177841			5.310996	6.198303	9.294097	90.0	90.0	90.0	orthorhombic	other	0	0
765	KGeO3	682321	K	Ge	-1.4717510790000001	OrthoPerovskite_GdFeO3	-1.4932729	test	-1.6052440404891968	-1.430384969697678	K	Ge	3.83069712	3.83067774	3.8305629999999997	90.00001273	89.99999718	89.94531031	cubic	cubic	2	1
766	KHfO3	681916	K	Hf	-2.7876270539999997	OrthoPerovskite_GdFeO3	-2.7888017000000005	train	-2.753763198852539	-2.7974823579134025	K	Hf	4.1453182	4.14530923	4.1459655	90.0	90.0	90.1316882	cubic	cubic	0	1
767	KHfO3	681917	Hf	K	-2.605282027	OrthoPerovskite_GdFeO3	-2.553233	train	-2.511763572692871	-2.548900192456815			6.409159	6.878083	7.110666999999999	90.0	90.0	90.0	orthorhombic	other	4	4
768	KHoO3	682584	K	Ho	-2.151677709	OrthoPerovskite_GdFeO3	-2.1791015	test	-2.272042989730835	-2.1541006353190415	K	Ho	6.192526	6.231916	8.781846	90.0	90.0	90.0	orthorhombic	orthorhombic	0	2
769	KHoO3	682585	Ho	K	-2.0631826380000002	OrthoPerovskite_GdFeO3	-2.059175	test	-2.1378836631774902	-2.0275490643096954			5.903874	5.928622	10.216277	90.0	90.0	90.0	tetragonal	other	4	4
770	KInO3	682539	In	K	-1.07105218	OrthoPerovskite_GdFeO3	-1.1379681000000001	train	-0.9798006415367126	-1.0554521514534907			6.122742	6.19449	8.118003	90.0	90.0	90.0	orthorhombic	other	3	0
771	KIrO3	681622	K	Ir	-1.132810851	OrthoPerovskite_GdFeO3	-1.114974	test	-0.9857569336891174	-1.0311877938765912	K	Ir	5.52122	5.574712	7.842115	90.0	90.0	90.0	orthorhombic	orthorhombic	1	1
772	KIrO3	681623	Ir	K	-1.026355771	OrthoPerovskite_GdFeO3	-1.0661821000000002	test	-1.0620086193084717	-0.9797004945930227			4.823862999999999	6.438992	10.417886	90.0	90.0	90.0	orthorhombic	other	5	3
773	KLaO3	682850	K	La	-2.065037035	OrthoPerovskite_GdFeO3	-2.2821363999999997	test	-2.015544414520264	-2.262827467702133	K	La	6.372325	6.394352	9.004739	90.0	90.0	90.0	tetragonal	tetragonal	0	0
774	KLaO3	682851	La	K	-1.938670306	OrthoPerovskite_GdFeO3	-2.0818863000000003	test	-1.7829416990280151	-2.051514999233708			6.239794	6.312394	9.726795	90.0	90.0	90.0	orthorhombic	other	4	4
775	KLuO3	682652	Lu	K	-2.100295343	OrthoPerovskite_GdFeO3	-2.0831037	train	-2.085293292999268	-2.0527996517712768			5.7561	5.77323	10.357119	90.0	90.0	90.0	tetragonal	other	3	3
776	KMnO3	681546	Mn	K	-1.543121925	OrthoPerovskite_GdFeO3	-1.6579163000000001	train	-1.6420861482620241	-1.6041237257384213			4.944884	5.600358	10.800229	90.0	90.0	90.0	orthorhombic	other	0	0
777	KMoO3	682268	K	Mo	-2.24698966	OrthoPerovskite_GdFeO3	-2.287538	train	-2.0194482803344727	-2.2685274670014053	K	Mo	3.9390853999999997	3.9390853999999997	3.9425114999999997	90.0	90.0	89.99913604	cubic	cubic	1	3
778	KMoO3	682269	Mo	K	-2.074109992	OrthoPerovskite_GdFeO3	-2.1260982000000004	train	-2.0224039554595947	-2.098169286670664			5.423293	6.18814	10.268034	90.0	90.0	90.0	orthorhombic	other	4	4
779	KNdO3	682526	K	Nd	-1.9916155469999999	OrthoPerovskite_GdFeO3	-2.0046525	test	-2.0840132236480717	-1.9700145908583977	K	Nd	6.373263	6.384997	8.986797	90.0	90.0	90.0	tetragonal	tetragonal	0	4
780	KNdO3	682527	Nd	K	-1.942851136	OrthoPerovskite_GdFeO3	-2.0088663	test	-1.8817040920257568	-1.9744611728058339			6.166007	6.250874	9.869469	90.0	90.0	90.0	orthorhombic	other	4	3
781	KNpO3	682036	Np	K	-2.617426412	OrthoPerovskite_GdFeO3	-2.6712689999999997	train	-2.414014339447021	-2.6734568270259813			5.370998999999999	5.622236	11.707397	90.0	90.0	90.0	orthorhombic	other	3	3
782	KNpO3	682037	K	Np	-2.883962561	OrthoPerovskite_GdFeO3	-2.8690605	train	-2.799034833908081	-2.882174875641551	K	Np	6.072057	6.101077	8.627386999999999	90.0	90.0	90.0	tetragonal	tetragonal	0	0
783	KOsO3	682824	K	Os	-1.4669706319999998	OrthoPerovskite_GdFeO3	-1.4768194	train	-1.275890827178955	-1.4130225329251358	K	Os	3.8960114999999997	3.90657113	3.90657113	89.893689	90.0	90.0	cubic	cubic	1	2
784	KOsO3	682825	Os	K	-1.310362913	OrthoPerovskite_GdFeO3	-1.3897091000000001	train	-1.1871833801269531	-1.3211000194181508			4.91133	6.2566440000000005	10.555552	90.0	90.0	90.0	orthorhombic	other	5	5
785	KPaO3	681579	K	Pa	-2.9463767310000004	OrthoPerovskite_GdFeO3	-2.9065182000000003	train	-2.8874220848083496	-2.9217018424203434	K	Pa	6.1822610000000005	6.20252	8.755817	90.0	90.0	90.0	tetragonal	tetragonal	2	2
786	KPaO3	681580	Pa	K	-2.726496745	OrthoPerovskite_GdFeO3	-2.7229826	train	-2.509440660476685	-2.728027229085151			5.479286	5.790954	11.298297999999999	90.0	90.0	90.0	orthorhombic	other	4	4
787	KPbO3	681501	Pb	K	-1.137139301	OrthoPerovskite_GdFeO3	-1.2243422	train	-0.8767963647842407	-1.1465977952396293			5.353317	6.470463	10.555344	90.0	90.0	90.0	orthorhombic	other	0	0
788	KPbO3	681502	K	Pb	-1.040616962	OrthoPerovskite_GdFeO3	-1.0935267	train	-1.0001085996627808	-1.0085556858028233	K	Pb	6.131767	6.135265	8.705009	90.0	90.0	90.0	tetragonal	tetragonal	1	1
789	KPdO3	682432	K	Pd	-0.668004403	OrthoPerovskite_GdFeO3	-0.7443671	train	-0.603818416595459	-0.6401075453751871	K	Pd	5.5721169999999995	5.64409	7.986274000000001	90.0	90.0	90.0	orthorhombic	orthorhombic	2	1
790	KPdO3	682433	Pd	K	-0.713656717	OrthoPerovskite_GdFeO3	-0.7422979999999999	train	-0.683846116065979	-0.637924142577845			5.906918	6.446966000000001	9.126978	90.0	90.0	90.0	orthorhombic	other	0	2
791	KPmO3	693227	K	Pm	-2.019882316	OrthoPerovskite_GdFeO3	-2.1062232999999995	train	-2.03185510635376	-2.077196442314715	K	Pm	6.327274	6.334074	8.93237	90.0	90.0	90.0	tetragonal	tetragonal	2	1
792	KPrO3	682580	Pr	K	-1.9221106630000002	OrthoPerovskite_GdFeO3	-2.0028985	train	-1.8192981481552124	-1.9681636950551313			6.2096029999999995	6.3185910000000005	9.812989	90.0	90.0	90.0	orthorhombic	other	4	4
793	KPrO3	682581	K	Pr	-1.96732428	OrthoPerovskite_GdFeO3	-2.0553765	train	-2.0552382469177246	-2.0235407246810144	K	Pr	6.4088389999999995	6.430601	9.008692	90.0	90.0	90.0	tetragonal	tetragonal	0	0
794	KPtO3	682462	K	Pt	-0.846552832	OrthoPerovskite_GdFeO3	-0.820536	test	-0.7150290012359619	-0.7204842257340218	K	Pt	5.574656	5.639434	7.963116	90.0	90.0	90.0	orthorhombic	orthorhombic	0	0
795	KPtO3	682463	Pt	K	-0.8172651679999999	OrthoPerovskite_GdFeO3	-0.8027326	test	-0.7379628419876099	-0.7016973167580424			6.310768	6.337206	9.444733	90.0	90.0	90.0	tetragonal	other	2	1
796	KPuO3	681428	K	Pu	-2.65197474	OrthoPerovskite_GdFeO3	-2.650195	train	-2.7149062156677246	-2.6512186410749954	K	Pu	4.311837000000001	6.06016	6.100974	90.0	90.0	90.0	orthorhombic	orthorhombic	0	0
797	KPuO3	681429	Pu	K	-2.339925122	OrthoPerovskite_GdFeO3	-2.3220818	train	-2.51440167427063	-2.3049795618981346			5.636946	5.668309	10.884188	90.0	90.0	90.0	orthorhombic	other	4	4
798	KRbO3	682826	K	Rb	-1.043740045	OrthoPerovskite_GdFeO3	-1.1166177	test	-0.848763108253479	-1.0329222964032894			6.635311	7.3511679999999995	7.580966	90.0	90.0	90.0	orthorhombic	other	1	0
799	KRbO3	682827	Rb	K	-1.05280469	OrthoPerovskite_GdFeO3	-1.0974507	test	-0.7582000494003296	-1.0126964583980436	Rb	K	6.89345	7.076396000000001	7.459455999999999	90.0	90.0	90.0	orthorhombic	orthorhombic	0	1
800	KReO3	682392	Re	K	-1.664158071	OrthoPerovskite_GdFeO3	-1.7384438999999998	test	-1.6877509355545044	-1.6890998927207994			4.980972	6.319678	10.465809	90.0	90.0	90.0	orthorhombic	other	4	3
801	KRhO3	682912	K	Rh	-1.0282124209999999	OrthoPerovskite_GdFeO3	-1.017672	train	-0.9652079939842224	-0.9285105627195792	K	Rh	5.541778	5.57869	7.893463000000001	90.0	90.0	90.0	orthorhombic	orthorhombic	1	4
802	KRhO3	682913	Rh	K	-0.994190687	OrthoPerovskite_GdFeO3	-1.0097979	train	-0.9742684364318848	-0.9202014756930698			4.928739	6.144241	10.596148	90.0	90.0	90.0	orthorhombic	other	4	5
803	KRuO3	682548	Ru	K	-1.186747829	OrthoPerovskite_GdFeO3	-1.1586670000000001	test	-1.0067356824874878	-1.077294515844725			6.24584	6.3779010000000005	9.50258	90.0	90.0	90.0	orthorhombic	other	4	5
804	KRuO3	682549	K	Ru	-1.36271244	OrthoPerovskite_GdFeO3	-1.3573552	test	-1.3292810916900637	-1.2869588006443244	K	Ru	3.9005626	3.9005626	3.901273	89.99999929	90.00000071	90.01158125	cubic	cubic	0	2
805	KSbO3	682096	Sb	K	-1.598509014	OrthoPerovskite_GdFeO3	-1.6736621999999999	train	-1.4612476825714111	-1.620739472733089			5.0527120000000005	5.704008999999999	11.812194	90.0	90.0	90.0	orthorhombic	other	4	4
806	KSbO3	682097	K	Sb	-1.741661195	OrthoPerovskite_GdFeO3	-1.7918154999999998	train	-1.6809475421905518	-1.7454198872781526	K	Sb	5.641089	5.649467	7.992182000000001	90.0	90.0	90.0	tetragonal	tetragonal	0	0
807	KScO3	682804	Sc	K	-2.1570559190000003	OrthoPerovskite_GdFeO3	-2.2405777000000002	test	-1.9931355714797971	-2.218972950359377	K	Sc	5.704542	5.82303	9.119655	90.0	90.0	90.0	orthorhombic	orthorhombic	3	3
808	KSiO3	693527	K	Si	-1.985539615	OrthoPerovskite_GdFeO3	-2.029719	train	-2.0510170459747314	-1.996465833533751	K	Si	3.64967414	3.64967185	3.6507964999999998	90.0	90.0	89.98428129000001	cubic	cubic	2	3
809	KSmO3	682742	K	Sm	-2.037693581	OrthoPerovskite_GdFeO3	-2.0956346999999997	train	-2.156579732894897	-2.0660228988127405	K	Sm	6.323565	6.347315	8.919048	90.0	90.0	90.0	tetragonal	tetragonal	1	1
810	KSmO3	682743	Sm	K	-2.137093477	OrthoPerovskite_GdFeO3	-2.1447475	train	-2.1225411891937256	-2.1178488254984007	K	Sm	6.325446	6.40051	8.505227	90.0	90.0	90.0	orthorhombic	orthorhombic	0	0
811	KSnO3	681839	Sn	K	-1.3978598759999998	OrthoPerovskite_GdFeO3	-1.464113	train	-1.2813441753387451	-1.3996141963033453			5.641438	6.399145	9.666449	90.0	90.0	90.0	orthorhombic	other	3	3
812	KTaO3	681974	K	Ta	-2.9203530030000002	OrthoPerovskite_GdFeO3	-2.9585903	train	-2.626950263977051	-2.976650549009427	K	Ta	4.0030235	4.00417682	4.00417682	89.97286354	90.0	90.0	cubic	cubic	2	2
813	KTaO3	681975	Ta	K	-2.684112883	OrthoPerovskite_GdFeO3	-2.692452	train	-2.4676060676574707	-2.695810034437946			5.76903	5.851045	10.453924	90.0	90.0	90.0	orthorhombic	other	4	4
814	KTbO3	682540	K	Tb	-1.982922361	OrthoPerovskite_GdFeO3	-2.0775104	train	-2.066564083099365	-2.04689736243467	K	Tb	6.217656	6.296291	8.848931	90.0	90.0	90.0	orthorhombic	orthorhombic	1	3
815	KTbO3	682541	Tb	K	-1.9072565730000002	OrthoPerovskite_GdFeO3	-1.9708008999999997	train	-1.8594508171081543	-1.934292935001018			5.9623669999999995	6.011122	10.113741000000001	90.0	90.0	90.0	orthorhombic	other	4	4
816	KTcO3	682808	K	Tc	-1.8316761000000001	OrthoPerovskite_GdFeO3	-1.8558339	train	-1.6734164953231812	-1.8129748404661865	K	Tc	3.9010620000000005	3.90426923	3.90426923	90.00345551	90.0	90.0	cubic	cubic	1	1
817	KTcO3	682809	Tc	K	-1.684833695	OrthoPerovskite_GdFeO3	-1.7075806	train	-1.620063304901123	-1.6565316188069212			5.248602	6.066149	10.432367999999999	90.0	90.0	90.0	orthorhombic	other	4	4
818	KTeO3	682030	K	Te	-1.482089658	OrthoPerovskite_GdFeO3	-1.5472549999999998	train	-1.3835327625274658	-1.4873491899607858	K	Te	4.0877354	4.08773847	4.087962	90.0	90.0	90.00830556	cubic	cubic	0	0
819	KTeO3	682031	Te	K	-1.338077543	OrthoPerovskite_GdFeO3	-1.4235909	train	-1.147818088531494	-1.3568535436069202			6.064841	6.191688	9.308963	90.0	90.0	90.0	orthorhombic	other	4	4
820	KThO3	681866	K	Th	-2.8350593999999996	OrthoPerovskite_GdFeO3	-2.8262806	train	-2.718313217163086	-2.8370316958387325	K	Th	6.331232	6.3545169999999995	8.976723	90.0	90.0	90.0	tetragonal	tetragonal	0	0
821	KThO3	681867	Th	K	-2.710124698	OrthoPerovskite_GdFeO3	-2.6642122	train	-2.533118486404419	-2.6660101899082576			5.924206	5.9398029999999995	11.066303	90.0	90.0	90.0	tetragonal	other	4	4
822	KTiO3	682272	K	Ti	-2.442739466	OrthoPerovskite_GdFeO3	-2.51756	train	-2.429818153381348	-2.5112565174340604	K	Ti	3.94081542	3.94081542	3.942103	90.0	90.0	89.97694045	cubic	cubic	3	2
823	KTiO3	682273	Ti	K	-2.365490184	OrthoPerovskite_GdFeO3	-2.3637652	train	-2.2702674865722656	-2.348965668013222			5.853312	6.421945	8.417399000000001	90.0	90.0	90.0	orthorhombic	other	4	4
824	KTlO3	693428	K	Tl	-0.616544954	OrthoPerovskite_GdFeO3	-0.84222037	train	-0.6619131565093994	-0.743366500209204	K	Tl	6.05847	6.067758	8.558635	90.0	90.0	90.0	tetragonal	tetragonal	0	0
825	KTmO3	682506	K	Tm	-2.193759011	OrthoPerovskite_GdFeO3	-2.2486312	train	-2.4258086681365967	-2.227471347937258	K	Tm	4.360434	6.083851	6.227754	90.0	90.0	90.0	orthorhombic	orthorhombic	1	0
826	KTmO3	682507	Tm	K	-2.089492102	OrthoPerovskite_GdFeO3	-2.118025	train	-2.2284414768218994	-2.089650100810385			5.826693	5.847268	6.59562246	116.31263354	116.21297976	90.0	error	other	4	4
827	KUO3	682614	K	U	-3.139794012	OrthoPerovskite_GdFeO3	-3.1288717	train	-3.2868566513061523	-3.1563387637382054	K	U	6.1203	6.143883	8.670805999999999	90.0	90.0	90.0	tetragonal	tetragonal	0	0
828	KUO3	682615	U	K	-2.8699109160000003	OrthoPerovskite_GdFeO3	-2.8187215	train	-2.6531295776367188	-2.829055010282023			5.403091000000001	5.739593	11.298821	90.0	90.0	90.0	orthorhombic	other	3	3
829	KVO3	682308	K	V	-2.152611046	OrthoPerovskite_GdFeO3	-2.2021243999999998	train	-2.227011203765869	-2.178395383887465			5.39481	5.3963589999999995	7.623626	90.0	90.0	90.00002500000002	tetragonal	other	2	3
830	KVO3	682309	V	K	-2.332556239	OrthoPerovskite_GdFeO3	-2.338666	train	-2.095909833908081	-2.3224799188995746			5.4785330000000005	5.683171	10.354351	90.0	90.0	90.0	orthorhombic	other	0	0
831	KWO3	682946	K	W	-2.372027721	OrthoPerovskite_GdFeO3	-2.2609706000000003	test	-2.1641550064086914	-2.240492410465663	K	W	3.94189968	3.94189968	3.943504	90.0	90.0	89.95205384999998	cubic	cubic	0	2
832	KWO3	682947	W	K	-2.12500886	OrthoPerovskite_GdFeO3	-2.1114384999999998	test	-2.0839588642120357	-2.082699744363286			5.314936	6.346296	10.198698	90.0	90.0	90.0	orthorhombic	other	4	4
833	KYO3	682590	Y	K	-2.033384049	OrthoPerovskite_GdFeO3	-2.0692604	train	-2.0425348281860347	-2.0381916096541994			5.957771	5.981475	10.105983	90.0	90.0	90.0	tetragonal	other	4	4
834	KYO3	682591	K	Y	-2.110478251	OrthoPerovskite_GdFeO3	-2.177681	train	-2.134960651397705	-2.152601662976659	K	Y	6.167177	6.355461	8.859297999999999	90.0	90.0	90.0	orthorhombic	orthorhombic	0	2
835	KZrO3	682764	Zr	K	-2.492197564	OrthoPerovskite_GdFeO3	-2.5005412000000002	train	-2.4282381534576416	-2.4932975519285727			6.4629330000000005	6.888984	7.248748	90.0	90.0	90.0	orthorhombic	other	3	3
836	LaAgO3	682830	Ag	La	-1.7073850119999998	OrthoPerovskite_GdFeO3	-1.8513697	train	-1.7338746786117554	-1.8082640257313287			5.8347739999999995	6.067471	8.480202	90.0	90.0	90.0	orthorhombic	other	4	3
837	LaAgO3	682831	La	Ag	-1.962287022	OrthoPerovskite_GdFeO3	-1.9956462	train	-1.9736382961273196	-1.9605107579775791	La	Ag	5.634664	5.993597	8.080483000000001	90.0	90.0	90.0	orthorhombic	orthorhombic	0	0
838	LaAlO3	681364	Al	La	-3.334694615	OrthoPerovskite_GdFeO3	-3.2392933	train	-3.44722056388855	-3.2728603578259645			5.460769	5.528555	9.137266	90.0	90.0	90.0	orthorhombic	other	4	4
839	LaAlO3	681365	La	Al	-3.559531383	OrthoPerovskite_GdFeO3	-3.5151086000000005	train	-3.3962574005126958	-3.5639124565982474	La	Al	5.358844	5.367445	7.57159	90.0	90.0	90.0	tetragonal	tetragonal	1	3
840	LaAsO3	693369	La	As	-2.415470261	OrthoPerovskite_GdFeO3	-2.4365639999999997	test	-2.378187656402588	-2.425786074742303	La	As	5.658241	5.9542589999999995	8.121647	90.0	90.0	90.0	orthorhombic	orthorhombic	0	1
841	LaBeO3	682516	Be	La	-2.871916788	OrthoPerovskite_GdFeO3	-2.8824687	test	-2.6386349201202397	-2.8963237816332006			4.859248	5.637071	8.36571	90.0	90.0	90.0	orthorhombic	other	0	0
842	LaBeO3	682517	La	Be	-2.756960068	OrthoPerovskite_GdFeO3	-2.7706795	test	-2.8096072673797607	-2.7783590375451297	La	Be	3.6650285000000005	3.67139302	3.67139302	90.52409241	90.0	90.0	cubic	cubic	4	4
843	LaCdO3	693341	La	Cd	-2.23555599	OrthoPerovskite_GdFeO3	-2.2034047	test	-2.2221996784210205	-2.1797464111947185	La	Cd	5.723108	6.093134	8.229071000000001	90.0	90.0	90.0	orthorhombic	orthorhombic	0	1
844	LaCoO3	681654	Co	La	-2.349272994	OrthoPerovskite_GdFeO3	-2.4131982000000005	test	-2.372442960739136	-2.4011294834310406			5.467218	6.178189	9.155319	90.0	90.0	90.0	orthorhombic	other	5	2
845	LaCoO3	681655	La	Co	-2.505400077	OrthoPerovskite_GdFeO3	-2.4188254000000002	test	-2.42150354385376	-2.407067545497254	La	Co	5.439614	5.4539	7.7163580000000005	90.0	90.0	90.0	tetragonal	tetragonal	0	0
846	LaCrO3	682304	Cr	La	-2.798869779	OrthoPerovskite_GdFeO3	-2.7373533	train	-2.9166793823242188	-2.7431918062345217			5.744922	5.7540830000000005	8.495085000000001	90.0	90.0	90.0	tetragonal	other	5	5
847	LaCrO3	682305	La	Cr	-3.168091864	OrthoPerovskite_GdFeO3	-3.1521285	train	-2.9789154529571533	-3.1808803335884903	La	Cr	5.506272	5.585897	7.818589	90.0	90.0	90.0	orthorhombic	orthorhombic	0	0
848	LaCuO3	681936	Cu	La	-1.9586621080000002	OrthoPerovskite_GdFeO3	-1.9335	train	-2.0532946586608887	-1.8949314302871936			5.692928	5.758344	8.369843	90.0	90.0	90.0	orthorhombic	other	4	4
849	LaCuO3	681937	La	Cu	-2.2365232999999995	OrthoPerovskite_GdFeO3	-2.2427394	train	-2.1686170101165767	-2.221254068636412	La	Cu	5.413539	5.4701059999999995	7.685622	90.0	90.0	90.0	orthorhombic	orthorhombic	0	0
850	LaErO3	693385	La	Er	-3.7761156430000002	OrthoPerovskite_GdFeO3	-3.652875	test	-3.671974658966065	-3.7092894529443585	La	Er	5.831557	6.039964	8.408656	90.0	90.0	90.0	orthorhombic	orthorhombic	0	1
851	LaEuO3	693529	Eu	La	-3.074236135	OrthoPerovskite_GdFeO3	-3.0335509999999997	train	-3.1238956451416016	-3.055752285064096			5.978644	6.231679	8.696878	90.0	90.0	90.0	orthorhombic	other	0	1
852	LaFeO3	682354	Fe	La	-2.5769139340000002	OrthoPerovskite_GdFeO3	-2.640534	train	-2.5935630798339844	-2.6410239407583744			5.687876	5.693645	8.773551	90.0	90.0	90.0	tetragonal	other	4	4
853	LaFeO3	682355	La	Fe	-2.7546856760000002	OrthoPerovskite_GdFeO3	-2.7732272	train	-2.7524969577789307	-2.781047479528015	La	Fe	5.519665	5.62121	7.85522	90.0	90.0	90.0	orthorhombic	orthorhombic	0	0
854	LaGaO3	682246	Ga	La	-2.771968575	OrthoPerovskite_GdFeO3	-2.7152395	test	-2.8675098419189453	-2.7198563788603676			5.657999	5.690849	8.752875	90.0	90.0	90.0	orthorhombic	other	4	3
855	LaGaO3	682247	La	Ga	-2.934686764	OrthoPerovskite_GdFeO3	-2.9054808999999997	test	-2.9534502029418945	-2.9206072391040783	La	Ga	5.512415	5.53568	7.814571000000001	90.0	90.0	90.0	tetragonal	tetragonal	0	1
856	LaHfO3	682336	Hf	La	-3.261615355	OrthoPerovskite_GdFeO3	-3.2153046	test	-3.3382811546325684	-3.247546455798707			5.982371	6.230519	7.7802940000000005	90.0	90.0	90.0	orthorhombic	other	4	2
857	LaHfO3	682337	La	Hf	-3.481095028	OrthoPerovskite_GdFeO3	-3.3764483999999997	test	-3.3818976879119877	-3.4175922842721125	La	Hf	5.708596	5.898201	8.123127	90.0	90.0	90.0	orthorhombic	orthorhombic	0	0
858	LaHgO3	693563	La	Hg	-1.948103786	OrthoPerovskite_GdFeO3	-2.1222727000000003	train	-1.8412216901779173	-2.0941324554874288	La	Hg	5.729546	6.459935	8.140328	90.0	90.0	90.0	orthorhombic	orthorhombic	0	0
859	LaHoO3	693477	La	Ho	-3.759259503	OrthoPerovskite_GdFeO3	-3.6777727999999996	train	-3.67511796951294	-3.7355626761658858	La	Ho	5.848844000000001	6.0627260000000005	8.445048	90.0	90.0	90.0	orthorhombic	orthorhombic	0	0
860	LaInO3	693104	La	In	-2.772752698	OrthoPerovskite_GdFeO3	-2.7423474999999997	train	-2.7125015258789062	-2.7484618996328516	La	In	5.720864	5.971672	8.25071	90.0	90.0	90.0	orthorhombic	orthorhombic	0	0
861	LaIrO3	693299	La	Ir	-2.25513788	OrthoPerovskite_GdFeO3	-2.1695247	test	-2.0507237911224365	-2.1439947864429194	La	Ir	5.465781	5.893528	7.908192999999999	90.0	90.0	90.0	orthorhombic	orthorhombic	0	1
862	LaMgO3	681626	Mg	La	-2.8145392439999997	OrthoPerovskite_GdFeO3	-2.5406542	test	-2.784797191619873	-2.5356265048113626			5.559661	5.995455000000001	8.57998	90.0	90.0	90.0	orthorhombic	other	2	5
863	LaMgO3	681627	La	Mg	-2.9170154860000004	OrthoPerovskite_GdFeO3	-2.900428	test	-2.8904714584350586	-2.9152752029556614	La	Mg	5.484415	5.767481	7.833842	90.0	90.0	90.0	orthorhombic	orthorhombic	0	0
864	LaMnO3	682004	Mn	La	-2.63865138	OrthoPerovskite_GdFeO3	-2.6793970000000003	train	-2.701248407363892	-2.682033840189578			5.791068	5.841664	8.350689	90.0	90.0	90.0	orthorhombic	other	4	4
865	LaMnO3	682005	La	Mn	-2.9319631580000003	OrthoPerovskite_GdFeO3	-2.8513447999999997	train	-2.8760077953338623	-2.8634805114557347	La	Mn	5.509003	5.662911	7.8137039999999995	90.0	90.0	90.0	orthorhombic	orthorhombic	0	0
866	LaMoO3	693078	La	Mo	-2.681255814	OrthoPerovskite_GdFeO3	-2.7667987000000003	train	-2.576521635055542	-2.7742638514371967	La	Mo	5.542667	5.90259	7.986924	90.0	90.0	90.0	orthorhombic	orthorhombic	0	0
867	LaNbO3	681748	Nb	La	-2.73413792	OrthoPerovskite_GdFeO3	-2.7493455	train	-2.7768497467041016	-2.7558464884762137			5.71399	6.229762	8.103339	90.0	90.0	90.0	orthorhombic	other	4	3
868	LaNbO3	681749	La	Nb	-3.005581255	OrthoPerovskite_GdFeO3	-2.9163005	train	-2.911473035812378	-2.9320245436839065	La	Nb	5.610281	5.963037	8.01834	90.0	90.0	90.0	orthorhombic	orthorhombic	0	0
869	LaNiO3	682683	Ni	La	-2.1138118169999998	OrthoPerovskite_GdFeO3	-2.1181147	test	-2.1346325874328613	-2.0897447560860716			5.573462999999999	5.896003	8.468842	90.0	90.0	90.0	orthorhombic	other	3	3
870	LaNiO3	682684	La	Ni	-2.375509762	OrthoPerovskite_GdFeO3	-2.400553	test	-2.2424633502960205	-2.3877857276662393	La	Ni	5.401823	5.465944	7.673714	90.0	90.0	90.0	orthorhombic	orthorhombic	0	0
871	LaOsO3	693509	La	Os	-2.208585678	OrthoPerovskite_GdFeO3	-2.2365553	train	-2.1101582050323486	-2.2147283418764476	La	Os	5.345205	6.022633	7.829074	90.0	90.0	90.0	orthorhombic	orthorhombic	0	0
872	LaPdO3	681874	Pd	La	-1.8685676480000002	OrthoPerovskite_GdFeO3	-1.8556412	test	-1.7807755470275881	-1.81277149518609			5.815071	6.028303	8.256191000000001	90.0	90.0	90.0	orthorhombic	other	4	4
873	LaPdO3	681875	La	Pd	-2.195162137	OrthoPerovskite_GdFeO3	-2.294588	test	-2.1145260334014893	-2.275966928468353	La	Pd	5.592129	5.913595	7.878744999999999	90.0	90.0	90.0	orthorhombic	orthorhombic	0	0
874	LaPtO3	693150	La	Pt	-2.127486909	OrthoPerovskite_GdFeO3	-2.0937997999999998	test	-2.07456636428833	-2.0640866338700876	La	Pt	5.637894999999999	6.100869	7.686186	90.0	90.0	90.0	orthorhombic	orthorhombic	0	1
875	LaRhO3	682002	Rh	La	-2.0128805819999998	OrthoPerovskite_GdFeO3	-2.0151776999999997	test	-1.861816167831421	-1.9811212319693072			5.623393	5.901186	8.525482	90.0	90.0	90.0	orthorhombic	other	4	4
876	LaRhO3	682003	La	Rh	-2.385707238	OrthoPerovskite_GdFeO3	-2.3260197999999996	test	-2.217935085296631	-2.309135107892012	La	Rh	5.502756	5.806482	7.890223	90.0	90.0	90.0	orthorhombic	orthorhombic	0	1
877	LaRuO3	682420	Ru	La	-2.034231716	OrthoPerovskite_GdFeO3	-2.0573148999999997	test	-1.9508228302001955	-2.025586207249458			5.834859	5.842599	8.295823	90.0	90.0	90.0	tetragonal	other	4	5
878	LaRuO3	682421	La	Ru	-2.395839995	OrthoPerovskite_GdFeO3	-2.4172325	test	-2.263393878936768	-2.4053866493028284	La	Ru	5.452629	5.850459	7.876383000000001	90.0	90.0	90.0	orthorhombic	orthorhombic	0	0
879	LaScO3	681529	Sc	La	-3.556615383	OrthoPerovskite_GdFeO3	-3.3988794999999996	test	-3.491182804107666	-3.441262540174417			5.817225	5.923474	8.606913	90.0	90.0	90.0	orthorhombic	other	4	4
880	LaScO3	681530	La	Sc	-3.788894108	OrthoPerovskite_GdFeO3	-3.5996714	test	-3.737983703613281	-3.6531467391708987	La	Sc	5.653141000000001	5.799149	8.077801	90.0	90.0	90.0	orthorhombic	orthorhombic	0	0
881	LaTaO3	693132	La	Ta	-3.0100073430000003	OrthoPerovskite_GdFeO3	-2.9989858	train	-2.9484643936157227	-3.0192776079722754	La	Ta	5.58268	5.937839	7.990444	90.0	90.0	90.0	orthorhombic	orthorhombic	0	0
882	LaTcO3	681652	Tc	La	-2.205407144	OrthoPerovskite_GdFeO3	-2.209034	test	-2.2709531784057617	-2.1856866892707307			5.37183	6.3166519999999995	8.286159	90.0	90.0	90.0	orthorhombic	other	4	3
883	LaTcO3	681653	La	Tc	-2.531438898	OrthoPerovskite_GdFeO3	-2.7051382	test	-2.4079742431640625	-2.7091970551559594	La	Tc	5.4968129999999995	5.861190000000001	7.917517999999999	90.0	90.0	90.0	orthorhombic	orthorhombic	0	0
884	LaTiO3	681646	Ti	La	-3.189765234	OrthoPerovskite_GdFeO3	-3.0956771	test	-3.295555591583252	-3.1213104023749807			5.6981470000000005	5.896405000000001	8.542739	90.0	90.0	90.0	orthorhombic	other	4	4
885	LaTiO3	681647	La	Ti	-3.4653232989999996	OrthoPerovskite_GdFeO3	-3.2197382	test	-3.3623299598693848	-3.25222498010507	La	Ti	5.5243459999999995	5.644791000000001	7.879409	90.0	90.0	90.0	orthorhombic	orthorhombic	0	0
886	LaTlO3	682783	Tl	La	-2.215611574	OrthoPerovskite_GdFeO3	-2.260809	train	-2.1582210063934326	-2.2403218832354415			6.0049790000000005	6.079504	8.834897	90.0	90.0	90.0	orthorhombic	other	1	2
887	LaTlO3	682784	La	Tl	-2.287292504	OrthoPerovskite_GdFeO3	-2.2903835999999997	train	-2.201313018798828	-2.2715302658028724	La	Tl	5.817044999999999	6.164126	8.459712	90.0	90.0	90.0	orthorhombic	orthorhombic	0	0
888	LaTmO3	693302	La	Tm	-3.800316889	OrthoPerovskite_GdFeO3	-3.7230047999999996	train	-3.794888019561768	-3.7832934167436125	La	Tm	5.813785	6.0167019999999996	8.367144	90.0	90.0	90.0	orthorhombic	orthorhombic	0	0
889	LaVO3	682188	V	La	-2.9726719910000003	OrthoPerovskite_GdFeO3	-2.9884484000000002	train	-2.915391445159912	-3.008158092899678			5.724803	5.849687	8.570714	90.0	90.0	90.0	orthorhombic	other	4	3
890	LaVO3	682189	La	V	-3.2481365510000004	OrthoPerovskite_GdFeO3	-3.1324202999999997	train	-3.087073802947998	-3.1600833982008454	La	V	5.537282	5.689258000000001	7.858864	90.0	90.0	90.0	orthorhombic	orthorhombic	0	0
891	LaWO3	693340	La	W	-2.568730178	OrthoPerovskite_GdFeO3	-2.5467212000000004	test	-2.5105054378509517	-2.542028662643983	La	W	5.47777	5.950359	7.902321000000001	90.0	90.0	90.0	orthorhombic	orthorhombic	0	1
892	LaZnO3	681738	Zn	La	-2.3329676040000003	OrthoPerovskite_GdFeO3	-2.3353534	train	-2.3219218254089355	-2.3189843217285944			5.438744	5.977365	8.75918	90.0	90.0	90.0	orthorhombic	other	4	2
893	LaZnO3	681739	La	Zn	-2.421503095	OrthoPerovskite_GdFeO3	-2.4156213	train	-2.389401197433472	-2.4036864421658715	La	Zn	5.519845	5.612493	7.839606	90.0	90.0	90.0	orthorhombic	orthorhombic	0	0
894	LaZrO3	682018	Zr	La	-3.196655125	OrthoPerovskite_GdFeO3	-3.1633284	train	-3.252234935760498	-3.192698946990429			6.013271	6.178536	8.004408	90.0	90.0	90.0	orthorhombic	other	4	3
895	LaZrO3	682019	La	Zr	-3.419559799	OrthoPerovskite_GdFeO3	-3.1913986	train	-3.3859567642211914	-3.2223198223478065	La	Zr	5.766291000000001	5.989383	8.18984	90.0	90.0	90.0	orthorhombic	orthorhombic	0	2
896	LiAcO3	682476	Ac	Li	-2.247886878	OrthoPerovskite_GdFeO3	-2.3182566000000002	train	-2.2777562141418457	-2.300943047287728	Ac	Li	3.90474328	3.90474328	7.643553999999999	90.0	90.0	92.97460638	monoclinic	monoclinic	2	1
897	LiAcO3	682477	Li	Ac	-2.368704689	OrthoPerovskite_GdFeO3	-2.3783693	train	-2.3532235622406006	-2.364376538823073			5.900093	6.223689	7.559008	90.0	90.0	90.0	orthorhombic	other	0	0
898	LiAlO3	693404	Li	Al	-2.1880611169999997	OrthoPerovskite_GdFeO3	-2.2093236000000003	train	-2.1422011852264404	-2.1859922875743947	Li	Al	5.154513	5.405539	6.0170129999999995	90.0	90.0	90.0	orthorhombic	orthorhombic	0	0
899	LiAsO3	693330	Li	As	-1.660074331	OrthoPerovskite_GdFeO3	-1.6944298	train	-1.532631278038025	-1.6426543323020226	Li	As	4.890746	5.002953	7.057595	90.0	90.0	90.0	orthorhombic	orthorhombic	0	0
900	LiBiO3	693146	Li	Bi	-1.445224597	OrthoPerovskite_GdFeO3	-1.4323127	test	-1.5520802736282349	-1.3660571599221576			5.414333	5.500719	7.848961	90.0	90.0	90.0	orthorhombic	other	0	1
901	LiCeO3	682779	Ce	Li	-2.17993891	OrthoPerovskite_GdFeO3	-2.257961	train	-2.1937401294708248	-2.2373165518513467	Ce	Li	5.2685379999999995	5.74412	7.586950999999999	90.0	90.0	90.0	orthorhombic	orthorhombic	1	1
902	LiCeO3	682780	Li	Ce	-2.294323175	OrthoPerovskite_GdFeO3	-2.3403673	train	-2.315625667572021	-2.324275203409322			5.818987	6.017747	7.376161	90.0	90.0	90.0	orthorhombic	other	0	0
903	LiCoO3	693246	Li	Co	-1.142362511	OrthoPerovskite_GdFeO3	-1.1789834	train	-1.1682084798812866	-1.0987332498797735	Li	Co	4.78254	4.965237	6.889477	90.0	90.0	90.0	orthorhombic	orthorhombic	0	0
904	LiCrO3	693265	Li	Cr	-1.8304222890000001	OrthoPerovskite_GdFeO3	-1.8564866999999998	test	-1.8206751346588133	-1.813663702940743	Li	Cr	4.8571279999999994	5.074453	7.049353999999999	90.0	90.0	90.0	orthorhombic	orthorhombic	0	1
905	LiDyO3	693560	Dy	Li	-2.2812997999999998	OrthoPerovskite_GdFeO3	-2.29776	train	-2.545741081237793	-2.2793141585070984	Dy	Li	4.990736	5.762486	7.2149160000000006	90.0	90.0	90.0	orthorhombic	orthorhombic	0	0
906	LiEuO3	682864	Eu	Li	-1.7198916519999998	OrthoPerovskite_GdFeO3	-1.8967683000000002	train	-1.8777071237564087	-1.856170569753083	Eu	Li	3.72049713	3.720497130000001	7.428298	90.0	90.0	89.95016979	tetragonal	tetragonal	2	1
907	LiEuO3	682865	Li	Eu	-1.98518926	OrthoPerovskite_GdFeO3	-1.9426019	train	-1.911247491836548	-1.9045361443759892			5.554271	6.08407	7.203148	90.0	90.0	90.0	orthorhombic	other	0	0
908	LiFeO3	682798	Fe	Li	-1.175117763	OrthoPerovskite_GdFeO3	-1.2900531000000002	train	-1.2805156707763672	-1.2159387468011114			4.8046809999999995	5.041396	7.158875	90.0	90.0	90.0	orthorhombic	other	3	2
909	LiFeO3	682799	Li	Fe	-1.35431289	OrthoPerovskite_GdFeO3	-1.4706113	train	-1.2681121826171875	-1.406471480338901	Li	Fe	4.868519999999999	5.052212	6.979168	90.0	90.0	90.0	orthorhombic	orthorhombic	0	0
910	LiGdO3	693402	Gd	Li	-2.2686013	OrthoPerovskite_GdFeO3	-2.304141	train	-2.5609300136566158	-2.286047662566757	Gd	Li	4.9995389999999995	5.79776	7.308151	90.0	90.0	90.0	orthorhombic	orthorhombic	0	1
911	LiGeO3	693224	Li	Ge	-1.6122338	OrthoPerovskite_GdFeO3	-1.5873473	train	-1.6606268882751465	-1.5296562993184177	Li	Ge	5.040304	5.257448	6.6963029999999995	90.0	90.0	90.0	orthorhombic	orthorhombic	0	1
912	LiHfO3	682530	Hf	Li	-2.733889773	OrthoPerovskite_GdFeO3	-2.700536	test	-2.9613070487976074	-2.7043406169200463	Hf	Li	5.000806	5.535115	6.758411	90.0	90.0	90.0	orthorhombic	orthorhombic	2	1
913	LiHfO3	682531	Li	Hf	-2.753429833	OrthoPerovskite_GdFeO3	-2.783859	test	-2.955134153366089	-2.792266609517277	Li	Hf	5.32342	5.54524	7.337186	90.0	90.0	90.0	orthorhombic	orthorhombic	1	0
914	LiIrO3	682300	Ir	Li	-1.079196001	OrthoPerovskite_GdFeO3	-1.0748545	train	-1.045998215675354	-0.9888519819158531			5.13921	5.407655	6.627012	90.0	90.0	90.0	orthorhombic	other	2	3
915	LiIrO3	682301	Li	Ir	-1.3752318030000001	OrthoPerovskite_GdFeO3	-1.3997753000000002	train	-1.3003220558166504	-1.3317223041016386			5.01207	5.170375	7.302973	90.0	90.0	90.0	orthorhombic	other	1	1
916	LiLaO3	682854	Li	La	-2.404776453	OrthoPerovskite_GdFeO3	-2.4012067000000004	train	-2.319161891937256	-2.3884755398592814			5.84888	6.004698	7.3340380000000005	90.0	90.0	90.0	orthorhombic	other	0	0
917	LiLaO3	682855	La	Li	-2.2626905180000003	OrthoPerovskite_GdFeO3	-2.263904	train	-2.167364835739136	-2.2435878595815697	La	Li	5.296246	5.68865	7.597866000000001	90.0	90.0	90.0	orthorhombic	orthorhombic	1	3
918	LiMnO3	693271	Li	Mn	-1.604413568	OrthoPerovskite_GdFeO3	-1.6234545	train	-1.7357932329177856	-1.5677581607481155	Li	Mn	4.900859	5.115214	6.873892	90.0	90.0	90.0	orthorhombic	orthorhombic	0	0
919	LiMoO3	681736	Mo	Li	-2.0562808009999998	OrthoPerovskite_GdFeO3	-2.1634562	train	-1.9235572814941408	-2.137591045746157			4.760192	5.048071	7.705660000000001	90.0	90.0	90.0	orthorhombic	other	4	4
920	LiMoO3	681737	Li	Mo	-2.224193333	OrthoPerovskite_GdFeO3	-2.2845824	train	-2.1644837856292725	-2.265408591496198	Li	Mo	5.098093	5.319676	7.396064999999999	90.0	90.0	90.0	orthorhombic	orthorhombic	1	1
921	LiNbO3	682154	Nb	Li	-2.63431038	OrthoPerovskite_GdFeO3	-2.5344765	test	-2.3964061737060547	-2.52910753160507			4.771967	5.13926	7.818826	90.0	90.0	90.0	orthorhombic	other	3	4
922	LiNbO3	682155	Li	Nb	-2.693418088	OrthoPerovskite_GdFeO3	-2.5865862	test	-2.617095470428467	-2.584095915321978	Li	Nb	5.161288	5.392738	7.508328	90.0	90.0	90.0	orthorhombic	orthorhombic	1	2
923	LiNdO3	682675	Nd	Li	-2.215337893	OrthoPerovskite_GdFeO3	-2.2588188999999996	train	-2.4039907455444336	-2.2382218446162394	Nd	Li	5.130579	5.812772	7.486925	90.0	90.0	90.0	orthorhombic	orthorhombic	1	1
924	LiNdO3	682676	Li	Nd	-2.335289176	OrthoPerovskite_GdFeO3	-2.3585138	train	-2.383773803710937	-2.3434241661766926			5.762479	5.940849	7.257763000000001	90.0	90.0	90.0	orthorhombic	other	0	0
925	LiNpO3	693335	Li	Np	-2.8612316680000003	OrthoPerovskite_GdFeO3	-2.8672664	train	-2.831031084060669	-2.8802816646035585			5.385742	5.67668	7.994852000000001	90.0	90.0	90.0	orthorhombic	other	1	1
926	LiOsO3	681410	Os	Li	-1.275562428	OrthoPerovskite_GdFeO3	-1.2478069999999999	test	-1.0488858222961426	-1.1713588555842578			5.131042	5.4570739999999995	6.521936	90.0	90.0	90.0	orthorhombic	other	4	4
927	LiOsO3	681411	Li	Os	-1.561773665	OrthoPerovskite_GdFeO3	-1.5347961	test	-1.4209370613098145	-1.4742020259224098	Li	Os	5.0187800000000005	5.229209	7.284003	90.0	90.0	90.0	orthorhombic	orthorhombic	1	1
928	LiPaO3	681682	Pa	Li	-2.933587961	OrthoPerovskite_GdFeO3	-2.9879153	test	-2.9792156219482417	-3.0075955429836454	Pa	Li	5.194891	5.751187	7.383025	90.0	90.0	90.0	orthorhombic	orthorhombic	1	0
929	LiPaO3	681683	Li	Pa	-2.9287826519999998	OrthoPerovskite_GdFeO3	-2.9709547	test	-2.9212152957916264	-2.9896979926068634			5.517768	5.777081	8.161308	90.0	90.0	90.0	orthorhombic	other	2	2
930	LiPmO3	693209	Pm	Li	-2.234229235	OrthoPerovskite_GdFeO3	-2.2470174	test	-2.332326412200928	-2.2257683971691216	Pm	Li	5.076879	5.823404	7.438510000000001	90.0	90.0	90.0	orthorhombic	orthorhombic	0	0
931	LiPrO3	682472	Pr	Li	-2.201380501	OrthoPerovskite_GdFeO3	-2.2501472999999996	test	-2.307837009429932	-2.229071201487618	Pr	Li	5.187037999999999	5.809628	7.542746000000001	90.0	90.0	90.0	orthorhombic	orthorhombic	1	1
932	LiPrO3	682473	Li	Pr	-2.31711785	OrthoPerovskite_GdFeO3	-2.3879108	test	-2.3440945148468018	-2.374445137629722			5.792714	5.974146	7.316294999999999	90.0	90.0	90.0	orthorhombic	other	0	0
933	LiPuO3	693112	Li	Pu	-2.6532558219999998	OrthoPerovskite_GdFeO3	-2.7238762000000003	train	-2.8412570953369136	-2.7289701940166213			5.44515	5.519318	8.067053	90.0	90.0	90.0	orthorhombic	other	0	0
934	LiPuO3	693300	Pu	Li	-2.5351616580000003	OrthoPerovskite_GdFeO3	-2.5372698	train	-2.9858777523040767	-2.532055141210123	Pu	Li	5.189903	5.642930000000001	7.2568529999999996	90.0	90.0	90.0	orthorhombic	orthorhombic	1	1
935	LiReO3	682098	Re	Li	-1.69444553	OrthoPerovskite_GdFeO3	-1.6855052	train	-1.5172412395477295	-1.6332367127547998			4.789498	5.018994	7.816724000000001	90.0	90.0	90.0	orthorhombic	other	4	4
936	LiReO3	682099	Li	Re	-1.9047097119999998	OrthoPerovskite_GdFeO3	-1.8611349999999998	train	-1.8552123308181765	-1.8185687878679504	Li	Re	5.059677	5.3021720000000006	7.336289999999999	90.0	90.0	90.0	orthorhombic	orthorhombic	1	3
937	LiRhO3	693262	Li	Rh	-1.252838425	OrthoPerovskite_GdFeO3	-1.3289748	train	-1.192056655883789	-1.257010588982401			4.97002	5.14668	7.263684	90.0	90.0	90.0	orthorhombic	other	0	1
938	LiRuO3	681730	Ru	Li	-1.263881952	OrthoPerovskite_GdFeO3	-1.3429482	train	-1.1286137104034424	-1.2717559181827196			5.092028	5.4021669999999995	6.547153	90.0	90.0	90.0	orthorhombic	other	4	3
939	LiRuO3	681731	Li	Ru	-1.4891692490000001	OrthoPerovskite_GdFeO3	-1.5802138000000001	train	-1.435029149055481	-1.5221287250809041	Li	Ru	4.978992	5.19107	7.248406	90.0	90.0	90.0	orthorhombic	orthorhombic	1	0
940	LiSbO3	693059	Li	Sb	-1.900754344	OrthoPerovskite_GdFeO3	-1.9959068	train	-1.8392174243927	-1.960785754241166	Li	Sb	5.167877	5.320531	7.495653	90.0	90.0	90.0	orthorhombic	orthorhombic	1	1
941	LiSiO3	693162	Li	Si	-2.248189015	OrthoPerovskite_GdFeO3	-2.2929508999999997	train	-2.245790719985962	-2.2742393905438787	Li	Si	4.784916	4.928948	6.7972399999999995	90.0	90.0	90.0	orthorhombic	orthorhombic	0	0
942	LiSmO3	693250	Sm	Li	-2.240124546	OrthoPerovskite_GdFeO3	-2.3193712000000004	train	-2.4971184730529785	-2.302119220869439	Sm	Li	5.051085	5.822614	7.398863	90.0	90.0	90.0	orthorhombic	orthorhombic	0	0
943	LiSnO3	693350	Li	Sn	-1.622511824	OrthoPerovskite_GdFeO3	-1.678384	test	-1.8299177885055544	-1.62572211800325			5.388328	5.466736	7.217460000000001	90.0	90.0	90.0	orthorhombic	other	0	1
944	LiTaO3	681702	Ta	Li	-2.828497245	OrthoPerovskite_GdFeO3	-2.864732	train	-2.5040292739868164	-2.8776072573493976			4.747598	5.104938	7.828310000000001	90.0	90.0	90.0	orthorhombic	other	3	2
945	LiTaO3	681703	Li	Ta	-2.939624672	OrthoPerovskite_GdFeO3	-2.9681392000000004	train	-2.777251958847046	-2.9867269566125105	Li	Ta	5.151137	5.380047	7.485213000000001	90.0	90.0	90.0	orthorhombic	orthorhombic	1	0
946	LiTbO3	693484	Tb	Li	-2.14476706	OrthoPerovskite_GdFeO3	-2.2461276000000003	train	-2.44683575630188	-2.2248294421601447	Tb	Li	4.994937999999999	5.780126	7.264651	90.0	90.0	90.0	orthorhombic	orthorhombic	0	0
947	LiTcO3	682082	Tc	Li	-1.6573397619999999	OrthoPerovskite_GdFeO3	-1.7234672	train	-1.6122130155563354	-1.6732958384580998			4.780512	5.006213	7.734292999999999	90.0	90.0	90.0	orthorhombic	other	3	3
948	LiTcO3	682083	Li	Tc	-1.8395841919999998	OrthoPerovskite_GdFeO3	-1.8478359	train	-1.8174431324005127	-1.8045350088615557	Li	Tc	5.029138	5.262698	7.298533	90.0	90.0	90.0	orthorhombic	orthorhombic	1	1
949	LiTeO3	693062	Li	Te	-1.51125612	OrthoPerovskite_GdFeO3	-1.5530167	train	-1.5297795534133911	-1.4934291821783905			5.30043	5.489635	7.704741	90.0	90.0	90.0	orthorhombic	other	1	1
950	LiThO3	693308	Th	Li	-2.9604308560000003	OrthoPerovskite_GdFeO3	-3.005218	train	-2.817803382873535	-3.0258540919090575	Th	Li	5.12866	6.067893	7.522782	90.0	90.0	90.0	orthorhombic	orthorhombic	0	0
951	LiTiO3	682628	Ti	Li	-2.406782367	OrthoPerovskite_GdFeO3	-2.4303236	train	-2.547369241714477	-2.419200937814879			4.842382	4.858323	8.041048	90.0	90.0	90.0	tetragonal	other	3	4
952	LiTiO3	682629	Li	Ti	-2.453964781	OrthoPerovskite_GdFeO3	-2.4314342	train	-2.5347800254821777	-2.4203728904255444			5.080253	5.396026999999999	7.035558999999999	90.0	90.0	90.0	orthorhombic	other	0	3
953	LiUO3	681728	U	Li	-3.0471606760000003	OrthoPerovskite_GdFeO3	-3.0216868	test	-3.265120506286621	-3.043232673895847	U	Li	5.1671830000000005	5.646583000000001	7.358753	90.0	90.0	90.0	orthorhombic	orthorhombic	2	1
954	LiUO3	681729	Li	U	-3.112719474	OrthoPerovskite_GdFeO3	-2.9765701	test	-3.247800350189209	-2.9956236028084944			5.473599	5.672745	8.063488000000001	90.0	90.0	90.0	orthorhombic	other	1	2
955	LiVO3	682178	V	Li	-2.164459415	OrthoPerovskite_GdFeO3	-2.2934964	train	-2.089852094650269	-2.274815025470151			4.69129	5.018786	7.600784	90.0	90.0	90.0	orthorhombic	other	3	2
956	LiVO3	682179	Li	V	-2.2756749569999997	OrthoPerovskite_GdFeO3	-2.3085315	train	-2.224757432937622	-2.290680705910109	Li	V	4.908634999999999	5.116632	7.103544	90.0	90.0	90.0	orthorhombic	orthorhombic	1	1
957	LiWO3	681458	W	Li	-2.138880658	OrthoPerovskite_GdFeO3	-2.1614711	train	-1.83619487285614	-2.135496283340762			4.762624	5.05697	7.785833	90.0	90.0	90.0	orthorhombic	other	3	3
958	LiWO3	681459	Li	W	-2.346432288	OrthoPerovskite_GdFeO3	-2.3001409	train	-2.22119140625	-2.2818265859974045	Li	W	5.15744	5.351829	7.471092	90.0	90.0	90.0	orthorhombic	orthorhombic	1	1
959	LiYO3	693549	Y	Li	-2.2557590640000003	OrthoPerovskite_GdFeO3	-2.2921896	train	-2.4925577640533447	-2.2734360342297246	Y	Li	5.023445	5.7716709999999996	7.2263470000000005	90.0	90.0	90.0	orthorhombic	orthorhombic	0	1
960	LiZrO3	693240	Li	Zr	-2.604603179	OrthoPerovskite_GdFeO3	-2.6653022999999996	test	-2.783252239227295	-2.667160510042317			5.3853349999999995	5.585274	7.38382	90.0	90.0	90.0	orthorhombic	other	1	0
961	LuAlO3	681968	Lu	Al	-3.6217853069999997	OrthoPerovskite_GdFeO3	-3.5260942	train	-3.7432186603546143	-3.5755049314764458	Lu	Al	5.0777730000000005	5.325675	7.283264	90.0	90.0	90.0	orthorhombic	orthorhombic	0	0
962	LuAlO3	681969	Al	Lu	-3.393111326	OrthoPerovskite_GdFeO3	-3.3757230000000003	train	-3.4123988151550293	-3.416826811173088			5.2820160000000005	5.282108999999999	8.160573	90.0	90.0	90.0	tetragonal	other	4	3
963	LuBeO3	693408	Lu	Be	-2.7904615230000003	OrthoPerovskite_GdFeO3	-2.7681499	train	-3.0127673149108887	-2.7756896954562236	Lu	Be	4.852136	5.335669	6.888496000000001	90.0	90.0	90.0	orthorhombic	orthorhombic	1	0
964	LuBiO3	693566	Bi	Lu	-2.6863091939999997	OrthoPerovskite_GdFeO3	-2.577425	train	-2.487726211547852	-2.5744286253374384	Bi	Lu	5.682421	6.058927	8.243039999999999	90.0	90.0	90.0	orthorhombic	orthorhombic	0	0
965	LuCoO3	693230	Lu	Co	-2.572799898	OrthoPerovskite_GdFeO3	-2.5338702	train	-2.57843017578125	-2.528467737918912	Lu	Co	5.1137120000000005	5.546402	7.283005	90.0	90.0	90.0	orthorhombic	orthorhombic	0	0
966	LuCrO3	693378	Lu	Cr	-3.232833727	OrthoPerovskite_GdFeO3	-3.179602	train	-3.108750104904175	-3.209871545590219	Lu	Cr	5.174885	5.518894	7.4927470000000005	90.0	90.0	90.0	orthorhombic	orthorhombic	0	0
967	LuCuO3	693156	Lu	Cu	-2.308520702	OrthoPerovskite_GdFeO3	-2.3110117999999997	test	-2.414811372756958	-2.293298024530885	Lu	Cu	5.120959	5.808733	7.0585770000000005	90.0	90.0	90.0	orthorhombic	orthorhombic	0	0
968	LuFeO3	693480	Lu	Fe	-2.808139067	OrthoPerovskite_GdFeO3	-2.8625467	train	-2.749863147735596	-2.8753012353431964	Lu	Fe	5.196784	5.533338	7.533824000000001	90.0	90.0	90.0	orthorhombic	orthorhombic	0	0
969	LuGaO3	693339	Lu	Ga	-3.0016272999999996	OrthoPerovskite_GdFeO3	-3.0038017999999997	train	-3.074185848236084	-3.0243596571105473	Lu	Ga	5.172124	5.506557	7.476542	90.0	90.0	90.0	orthorhombic	orthorhombic	0	0
970	LuMnO3	693530	Lu	Mn	-2.981875277	OrthoPerovskite_GdFeO3	-3.0245439999999997	train	-2.9347145557403564	-3.0462477135133446	Lu	Mn	5.189272	5.657559	7.405644000000001	90.0	90.0	90.0	orthorhombic	orthorhombic	0	0
971	LuNiO3	693164	Lu	Ni	-2.4404319930000002	OrthoPerovskite_GdFeO3	-2.48652	train	-2.499262809753418	-2.4785017821242654	Lu	Ni	5.053518	5.530142	7.241397	90.0	90.0	90.0	orthorhombic	orthorhombic	0	0
972	LuNpO3	693177	Np	Lu	-3.748756544	OrthoPerovskite_GdFeO3	-3.518214	train	-3.6509976387023926	-3.567189407469092	Np	Lu	5.719747	6.006194	8.229051	90.0	90.0	90.0	orthorhombic	orthorhombic	0	1
973	LuPbO3	693235	Pb	Lu	-2.481889109	OrthoPerovskite_GdFeO3	-2.4982017999999995	train	-2.4781339168548584	-2.490828917012859	Pb	Lu	5.713826	5.960342	8.31603	90.0	90.0	90.0	orthorhombic	orthorhombic	0	0
974	LuTiO3	693469	Lu	Ti	-3.482008855	OrthoPerovskite_GdFeO3	-3.4570193	train	-3.5028810501098637	-3.502614143266054	Lu	Ti	5.221873	5.601128	7.553432000000001	90.0	90.0	90.0	orthorhombic	orthorhombic	0	0
975	LuTlO3	682734	Tl	Lu	-2.366496869	OrthoPerovskite_GdFeO3	-2.3751792999999997	train	-2.360651731491089	-2.3610103144146235			5.648873	5.771612	8.294932000000001	90.0	90.0	90.0	orthorhombic	other	0	0
976	LuTlO3	682735	Lu	Tl	-2.300359568	OrthoPerovskite_GdFeO3	-2.3269782	train	-2.2320594787597656	-2.310146452554413			5.4466470000000005	5.7915410000000005	8.636365	90.0	90.0	90.0	orthorhombic	other	2	2
977	MgAlO3	693473	Mg	Al	-2.611492864	OrthoPerovskite_GdFeO3	-2.5951588	train	-2.7081756591796875	-2.593142089417234	Mg	Al	5.028955000000001	5.273394000000001	6.75405	90.0	90.0	90.0	orthorhombic	orthorhombic	0	0
978	MgBiO3	693427	Bi	Mg	-1.897325074	OrthoPerovskite_GdFeO3	-1.9169247999999999	train	-1.7457555532455444	-1.8774405704706045	Bi	Mg	5.348028	5.669804	7.811375	90.0	90.0	90.0	orthorhombic	orthorhombic	0	0
979	MgFeO3	693447	Mg	Fe	-1.9542737540000001	OrthoPerovskite_GdFeO3	-2.0383968	train	-1.8650233745574951	-2.0056230191674924	Mg	Fe	4.97745	5.215282	7.261766000000001	90.0	90.0	90.0	orthorhombic	orthorhombic	0	0
980	MgMnO3	693455	Mg	Mn	-2.218937429	OrthoPerovskite_GdFeO3	-2.2754657000000003	train	-2.251081943511963	-2.2557882598145356	Mg	Mn	4.951423	5.182837999999999	7.208182000000001	90.0	90.0	90.0	orthorhombic	orthorhombic	0	0
981	MgNpO3	682856	Np	Mg	-3.275235293	OrthoPerovskite_GdFeO3	-3.2935305	test	-3.2595467567443848	-3.3300937705174727	Np	Mg	5.343806	5.679317	7.631330999999999	90.0	90.0	90.0	orthorhombic	orthorhombic	0	0
982	MgNpO3	682857	Mg	Np	-3.179511466	OrthoPerovskite_GdFeO3	-3.1393193999999998	test	-3.088146209716797	-3.1673636235351172			5.596804	5.647151	8.303005	90.0	90.0	90.0	orthorhombic	other	1	1
983	MgSiO3	693487	Mg	Si	-2.8686754810000004	OrthoPerovskite_GdFeO3	-2.6587267000000003	test	-2.8454909324646	-2.660221655741316	Mg	Si	4.783328	4.9355269999999996	6.9099770000000005	90.0	90.0	90.0	orthorhombic	orthorhombic	0	2
984	MgTiO3	693501	Mg	Ti	-3.0937301039999996	OrthoPerovskite_GdFeO3	-3.0225492000000003	train	-2.8828601837158203	-3.0441427152531655	Mg	Ti	5.044386	5.279682	7.396298	90.0	90.0	90.0	orthorhombic	orthorhombic	0	1
985	MgUO3	682600	Mg	U	-3.2557448960000004	OrthoPerovskite_GdFeO3	-3.3262226999999998	train	-3.164342403411865	-3.364591977917436			5.635146	5.645364	8.376595	90.0	90.0	90.0	tetragonal	other	1	0
986	MgUO3	682601	U	Mg	-3.3631280869999998	OrthoPerovskite_GdFeO3	-3.3148693999999996	train	-3.2447509765625	-3.3526114902759185	U	Mg	5.348033	5.7321800000000005	7.683102000000001	90.0	90.0	90.0	orthorhombic	orthorhombic	0	1
987	MnAgO3	682402	Mn	Ag	-0.968492895	OrthoPerovskite_GdFeO3	-0.9365391	test	-0.9675357341766356	-0.8428956572938044			4.903539	5.23731	8.828524	90.0	90.0	90.0	orthorhombic	other	1	1
988	MnAgO3	682403	Ag	Mn	-1.01255945	OrthoPerovskite_GdFeO3	-0.9102444	test	-1.1534630060195925	-0.8151483654590602			5.327628	5.333156	7.356323	90.0	90.0	90.0	tetragonal	other	0	2
989	MnAlO3	693419	Mn	Al	-2.508810064	OrthoPerovskite_GdFeO3	-2.4727552000000004	train	-2.607095718383789	-2.463976576563948			4.7927230000000005	5.079614	7.346963000000001	90.0	90.0	90.0	orthorhombic	other	0	0
990	MnAsO3	693577	Mn	As	-1.545614615	OrthoPerovskite_GdFeO3	-1.6705651000000001	train	-1.5754399299621582	-1.6174712803771627	Mn	As	5.2043230000000005	5.402579	7.562289	90.0	90.0	90.0	orthorhombic	orthorhombic	0	0
991	MnBiO3	682094	Mn	Bi	-1.552260956	OrthoPerovskite_GdFeO3	-1.5025253	train	-1.4284410476684568	-1.440148497822045			5.652202	5.729901	8.229658	90.0	90.0	90.0	orthorhombic	other	3	4
992	MnBiO3	682095	Bi	Mn	-1.7274594719999998	OrthoPerovskite_GdFeO3	-1.7041693	train	-1.5955711603164673	-1.6529318691754036	Bi	Mn	5.432062	5.785787	7.713649	90.0	90.0	90.0	orthorhombic	orthorhombic	0	1
993	MnCdO3	681599	Mn	Cd	-1.2870093009999999	OrthoPerovskite_GdFeO3	-1.1980225	train	-1.5195815563201904	-1.1188241223358535			5.332337	5.435596	8.349221	90.0	90.0	90.0	orthorhombic	other	3	4
994	MnCdO3	681600	Cd	Mn	-1.51446313	OrthoPerovskite_GdFeO3	-1.4513824	train	-1.55293071269989	-1.3861803228067322	Cd	Mn	5.259183	5.33796	7.4776039999999995	90.0	90.0	90.0	orthorhombic	orthorhombic	0	0
995	MnFeO3	693381	Mn	Fe	-1.693260671	OrthoPerovskite_GdFeO3	-1.7273136000000002	train	-1.7883020639419556	-1.6773547242150457			4.933553	5.242665000000001	7.675733999999999	90.0	90.0	90.0	orthorhombic	other	0	0
996	MnGeO3	693193	Mn	Ge	-1.9405898769999999	OrthoPerovskite_GdFeO3	-2.0240506999999996	train	-1.913779020309448	-1.9904844009900486	Mn	Ge	5.090274	5.237375	7.333595	90.0	90.0	90.0	orthorhombic	orthorhombic	0	0
997	MnHgO3	681378	Mn	Hg	-0.9387822690000001	OrthoPerovskite_GdFeO3	-0.98825747	train	-0.9421405792236328	-0.8974710928609447			5.098095	5.361089	8.988328	90.0	90.0	90.0	orthorhombic	other	4	4
998	MnHgO3	681379	Hg	Mn	-1.109526368	OrthoPerovskite_GdFeO3	-1.1219021999999998	train	-1.1732885837554932	-1.0384987267752162	Hg	Mn	5.379322	5.429975	7.599311	90.0	90.0	90.0	orthorhombic	orthorhombic	0	0
999	MnMoO3	693357	Mn	Mo	-1.9707763130000002	OrthoPerovskite_GdFeO3	-2.0282810000000002	test	-1.9137920141220093	-1.9949483944430462	Mn	Mo	5.287679	5.430497	7.636651	90.0	90.0	90.0	orthorhombic	orthorhombic	0	0
1000	MnNbO3	693171	Mn	Nb	-2.381467998	OrthoPerovskite_GdFeO3	-2.3451326	train	-2.365442514419556	-2.3293037517395976	Mn	Nb	5.31073	5.5558760000000005	7.704542999999999	90.0	90.0	90.0	orthorhombic	orthorhombic	0	0
1001	MnPbO3	681726	Pb	Mn	-1.560146675	OrthoPerovskite_GdFeO3	-1.5581123	train	-1.5312108993530271	-1.4988062771927135	Pb	Mn	5.442489	5.5362540000000005	7.74337	90.0	90.0	90.0	orthorhombic	orthorhombic	0	1
1002	MnPbO3	681727	Mn	Pb	-1.4760744209999999	OrthoPerovskite_GdFeO3	-1.5907247	train	-1.3932414054870603	-1.533220276220328			5.532488	5.6607330000000005	8.100601	90.0	90.0	90.0	orthorhombic	other	3	0
1003	MnReO3	693474	Mn	Re	-1.6497214009999999	OrthoPerovskite_GdFeO3	-1.7026525000000001	train	-1.6780097484588623	-1.6513312769551107	Mn	Re	5.2943489999999995	5.381085	7.614146000000001	90.0	90.0	89.99466600000001	orthorhombic	orthorhombic	0	0
1004	MnRuO3	693570	Mn	Ru	-1.52904436	OrthoPerovskite_GdFeO3	-1.5497511999999998	train	-1.483834981918335	-1.4899832869414658	Mn	Ru	5.218319	5.328207	7.506028999999999	90.0	90.0	90.0	orthorhombic	orthorhombic	0	1
1005	MnSbO3	693503	Sb	Mn	-1.647290851	OrthoPerovskite_GdFeO3	-1.7393936	train	-1.6844435930252075	-1.690102056771177	Sb	Mn	5.2866230000000005	5.6801699999999995	7.741714999999999	90.0	90.0	90.0	orthorhombic	orthorhombic	0	0
1006	MnSiO3	693210	Mn	Si	-2.487420471	OrthoPerovskite_GdFeO3	-2.4415638	train	-2.490011215209961	-2.431062077500097	Mn	Si	4.927778	5.025907	7.0327589999999995	90.0	90.0	90.0	orthorhombic	orthorhombic	0	1
1007	MnSnO3	693528	Mn	Sn	-1.9840444869999998	OrthoPerovskite_GdFeO3	-2.0290139	test	-1.8331243991851809	-1.99572178186278	Mn	Sn	5.367539	5.544047	7.822541999999999	90.0	90.0	90.0	orthorhombic	orthorhombic	0	0
1008	MnTcO3	693336	Mn	Tc	-1.722195252	OrthoPerovskite_GdFeO3	-1.7925627	train	-1.7168443202972412	-1.7462083646693731	Mn	Tc	5.222334	5.395347	7.556798	90.0	90.0	90.0	orthorhombic	orthorhombic	0	0
1009	MnTlO3	681896	Tl	Mn	-1.426450865	OrthoPerovskite_GdFeO3	-1.3824731000000001	train	-1.319246530532837	-1.3134642827976073	Tl	Mn	5.340858	5.537999999999999	7.724997999999999	90.0	90.0	90.0	orthorhombic	orthorhombic	0	1
1010	MnTlO3	681897	Mn	Tl	-1.2201828959999999	OrthoPerovskite_GdFeO3	-1.3289511	train	-1.2336862087249756	-1.256985579728959			5.6940919999999995	5.7016	7.687257000000001	90.0	90.0	90.0	tetragonal	other	5	3
1011	MnVO3	693176	Mn	V	-2.33026728	OrthoPerovskite_GdFeO3	-2.34991	train	-2.3754398822784424	-2.334345068507285	Mn	V	5.131991	5.274826	7.438442	90.0	90.0	90.0	orthorhombic	orthorhombic	0	1
1012	MnWO3	693368	Mn	W	-1.9247549240000001	OrthoPerovskite_GdFeO3	-1.9588506	train	-1.9524644613265991	-1.9216824674310238	Mn	W	5.2725349999999995	5.452275	7.645465	90.0	90.0	90.0	orthorhombic	orthorhombic	1	0
1013	MoAuO3	693554	Au	Mo	-1.223028847	OrthoPerovskite_GdFeO3	-1.4179888	train	-1.3359158039093018	-1.3509419681340142			5.418062	5.585831	7.780017	90.0	90.0	90.0	orthorhombic	other	1	1
1014	MoPbO3	681489	Pb	Mo	-1.746761451	OrthoPerovskite_GdFeO3	-1.7238944	train	-1.7025654315948486	-1.673746638165714	Pb	Mo	5.6079870000000005	5.696675	7.9839839999999995	90.0	90.0	90.0	orthorhombic	orthorhombic	3	2
1015	MoPdO3	693445	Pd	Mo	-1.3222231359999999	OrthoPerovskite_GdFeO3	-1.4198853	train	-1.5589300394058228	-1.3529432360307612			5.2580599999999995	5.581265	7.6167929999999995	90.0	90.0	90.0	orthorhombic	other	0	1
1016	Na2O3	682762	Na	Na	-0.8951647970000001	OrthoPerovskite_GdFeO3	-0.9413325000000001	train	-0.6203403472900391	-0.8479538579456722			5.658087999999999	6.457338	6.871709	90.0	90.0	90.0	orthorhombic	other	0	0
1017	NaAcO3	693406	Na	Ac	-2.017766122	OrthoPerovskite_GdFeO3	-2.0361412	train	-2.028918981552124	-2.0032428135951736			6.063363	6.228108	8.575044	90.0	90.0	90.0	orthorhombic	other	0	1
1018	NaAlO3	682599	Al	Na	-1.970943654	OrthoPerovskite_GdFeO3	-1.9641566000000004	train	-2.3263049125671387	-1.927281585522318			5.460726999999999	5.977504	7.001652	90.0	90.0	90.0	orthorhombic	other	0	3
1019	NaAsO3	681742	Na	As	-1.5304928869999999	OrthoPerovskite_GdFeO3	-1.534282	test	-1.5128263235092163	-1.4736595256188412	Na	As	5.1563360000000005	5.158777	7.295571000000001	90.0	90.0	90.0	tetragonal	tetragonal	1	2
1020	NaAsO3	681743	As	Na	-1.6299568359999999	OrthoPerovskite_GdFeO3	-1.6109645000000001	test	-1.5665429830551147	-1.5545781786598638			5.115998	5.131061	9.824328999999999	90.0	90.0	90.0	tetragonal	other	0	0
1021	NaAuO3	693535	Na	Au	-0.578165918	OrthoPerovskite_GdFeO3	-0.6850251	train	-0.5755056142807007	-0.5774873294359526	Na	Au	5.356585	5.588605	7.649267	90.0	90.0	90.0	orthorhombic	orthorhombic	0	0
1022	NaBiO3	681818	Na	Bi	-1.406847879	OrthoPerovskite_GdFeO3	-1.423362	test	-1.3434059619903564	-1.3566119985388658	Na	Bi	5.7055	5.818506	8.140463	90.0	90.0	90.0	orthorhombic	orthorhombic	0	1
1023	NaBiO3	681819	Bi	Na	-1.274975503	OrthoPerovskite_GdFeO3	-1.2615326999999998	test	-1.198361873626709	-1.1858428011526099			5.133233000000001	5.4789650000000005	9.716997000000001	90.0	90.0	90.0	orthorhombic	other	2	3
1024	NaCaO3	682667	Na	Ca	-1.719009443	OrthoPerovskite_GdFeO3	-1.7407805	train	-1.636526107788086	-1.6915655729567813			5.991955	6.287008	7.1274429999999995	90.0	90.0	90.0	orthorhombic	other	0	0
1025	NaCaO3	682668	Ca	Na	-1.6893773619999999	OrthoPerovskite_GdFeO3	-1.690268	train	-1.4783990383148191	-1.6382626229781727			6.1336059999999994	6.2544319999999995	7.223174	90.0	90.0	90.0	orthorhombic	other	1	1
1026	NaCoO3	681976	Na	Co	-1.032963406	OrthoPerovskite_GdFeO3	-0.99221355	train	-0.9185672998428344	-0.9016457176439464	Na	Co	5.229664	5.304707	7.369914	90.0	90.0	90.0	orthorhombic	orthorhombic	0	4
1027	NaCoO3	681977	Co	Na	-0.9817790059999999	OrthoPerovskite_GdFeO3	-1.0908396999999999	train	-1.031177639961243	-1.005720248503293			5.413869	5.515887	7.956516000000001	90.0	90.0	90.0	orthorhombic	other	5	0
1028	NaCrO3	682564	Cr	Na	-1.834778913	OrthoPerovskite_GdFeO3	-1.9217609	train	-1.922719955444336	-1.8825438299883785			5.219412999999999	5.228161	9.089459	90.0	90.0	90.0	tetragonal	other	0	0
1029	NaCrO3	682565	Na	Cr	-1.743123714	OrthoPerovskite_GdFeO3	-1.8154145000000002	train	-1.7083461284637451	-1.770322561201344	Na	Cr	5.151221	5.227912	7.398007000000001	90.0	90.0	90.0	orthorhombic	orthorhombic	1	1
1030	NaCuO3	693399	Na	Cu	-0.568980876	OrthoPerovskite_GdFeO3	-0.70855975	train	-0.5161491632461548	-0.6023220984874559	Na	Cu	5.15395	5.285639	7.354675	90.0	90.0	90.0	orthorhombic	orthorhombic	0	0
1031	NaDyO3	693463	Na	Dy	-2.313528385	OrthoPerovskite_GdFeO3	-2.2757115000000003	train	-2.3553624153137207	-2.2560476384852555			6.016767	6.145402	7.043479	90.0	90.0	90.0	orthorhombic	other	0	0
1032	NaErO3	693498	Na	Er	-2.1058729830000003	OrthoPerovskite_GdFeO3	-2.1551454	train	-2.1732749938964844	-2.1288211342058014			5.941431	6.012388	7.676163000000001	90.0	90.0	90.0	orthorhombic	other	1	1
1033	NaEuO3	682758	Eu	Na	-1.7513393780000002	OrthoPerovskite_GdFeO3	-1.7958150000000002	test	-1.8654114007949831	-1.749640330701849	Eu	Na	5.995169000000001	6.292825	6.374089	90.0	90.0	90.0	orthorhombic	orthorhombic	1	1
1034	NaEuO3	682759	Na	Eu	-1.860039248	OrthoPerovskite_GdFeO3	-1.9718296999999998	test	-1.8068478107452397	-1.9353785687538116			6.163603	6.2619739999999995	7.091989	90.0	90.0	90.0	orthorhombic	other	0	0
1035	NaFeO3	682647	Na	Fe	-1.297149822	OrthoPerovskite_GdFeO3	-1.2687217	train	-1.235499143600464	-1.193428941363374	Na	Fe	5.2625	5.273523	7.447577000000001	90.0	90.0	90.0	tetragonal	tetragonal	1	0
1036	NaFeO3	682648	Fe	Na	-1.219558841	OrthoPerovskite_GdFeO3	-1.2163149	train	-1.3159356117248535	-1.1381270450220935			5.2855360000000005	5.410371	8.755561	90.0	90.0	90.0	orthorhombic	other	4	1
1037	NaGaO3	682468	Na	Ga	-1.25123383	OrthoPerovskite_GdFeO3	-1.2778695	test	-1.3429927825927734	-1.2030820910949123	Na	Ga	3.8514699999999995	5.02	5.835975	90.0	90.0	90.0	orthorhombic	orthorhombic	1	1
1038	NaGaO3	682469	Ga	Na	-1.390269833	OrthoPerovskite_GdFeO3	-1.3704399999999999	test	-1.7216594219207764	-1.300766441126979			5.574187	6.024617	7.156207000000001	90.0	90.0	90.0	orthorhombic	other	0	0
1039	NaGeO3	682732	Na	Ge	-1.5585924119999999	OrthoPerovskite_GdFeO3	-1.6463461	train	-1.6665003299713137	-1.5919143559419846	Na	Ge	5.2589120000000005	5.273865	7.457097999999999	90.0	90.0	90.0	tetragonal	tetragonal	2	1
1040	NaGeO3	682733	Ge	Na	-1.6035728059999999	OrthoPerovskite_GdFeO3	-1.6859110000000002	train	-1.626811981201172	-1.6336649302673232			5.081647	5.578733000000001	8.634994	90.0	90.0	90.0	orthorhombic	other	0	0
1041	NaHfO3	681832	Na	Hf	-2.748740933	OrthoPerovskite_GdFeO3	-2.7234664	train	-2.8278255462646484	-2.7285377555330528	Na	Hf	5.60984	5.751415	8.014742	90.0	90.0	90.0	orthorhombic	orthorhombic	0	3
1042	NaHfO3	681833	Hf	Na	-2.654332198	OrthoPerovskite_GdFeO3	-2.632299	train	-2.6331381797790527	-2.6323340166193225			5.150357	5.272608	9.643903	90.0	90.0	90.0	orthorhombic	other	4	4
1043	NaHoO3	693433	Na	Ho	-2.324498939	OrthoPerovskite_GdFeO3	-2.270867	train	-2.397475004196167	-2.250935514928287			6.023749	6.133351	7.002832000000001	90.0	90.0	90.0	orthorhombic	other	0	0
1044	NaIrO3	681856	Na	Ir	-1.265796144	OrthoPerovskite_GdFeO3	-1.3159219	train	-1.1452211141586304	-1.2432366107438309	Na	Ir	5.267326000000001	5.397526	7.541364	90.0	90.0	90.0	orthorhombic	orthorhombic	0	0
1045	NaIrO3	681857	Ir	Na	-0.935437933	OrthoPerovskite_GdFeO3	-1.0412630999999999	train	-0.9571528434753418	-0.9534049002249562			5.3422529999999995	5.657639	8.162879	90.0	90.0	90.0	orthorhombic	other	5	5
1046	NaLaO3	693555	Na	La	-2.3058233269999997	OrthoPerovskite_GdFeO3	-2.3044132999999998	train	-2.243417739868164	-2.2863350051706504			6.246767	6.396989	7.404406	90.0	90.0	90.0	orthorhombic	other	0	0
1047	NaLiO3	682775	Na	Li	-1.181621317	OrthoPerovskite_GdFeO3	-1.2459315	train	-0.8591550588607788	-1.1693797477854977			5.68	5.7641290000000005	5.919054	90.0	90.0	90.0	orthorhombic	other	0	0
1048	NaLiO3	682776	Li	Na	-1.096224472	OrthoPerovskite_GdFeO3	-1.182036	train	-0.6454297304153442	-1.1019544839328241	Na	Li	4.6948360000000005	5.98496	7.560803	90.0	90.0	90.0	orthorhombic	orthorhombic	1	1
1049	NaLuO3	693323	Na	Lu	-2.15429345	OrthoPerovskite_GdFeO3	-2.1810045	test	-2.2202470302581787	-2.1561087622937367			5.857711	5.971401999999999	7.674994	90.0	90.0	90.0	orthorhombic	other	1	2
1050	NaMnO3	681664	Na	Mn	-1.487556893	OrthoPerovskite_GdFeO3	-1.4542214	test	-1.6170334815979004	-1.3891761570059753	Na	Mn	5.203088	5.266826999999999	7.404197	90.0	90.0	90.0	orthorhombic	orthorhombic	0	3
1051	NaMnO3	681665	Mn	Na	-1.473247374	OrthoPerovskite_GdFeO3	-1.4886669	test	-1.6646095514297483	-1.425524521539272			5.121453	5.1526510000000005	9.301275	90.0	90.0	90.0	orthorhombic	other	1	1
1052	NaMoO3	681812	Na	Mo	-2.2504423730000003	OrthoPerovskite_GdFeO3	-2.2274727999999997	test	-1.987250566482544	-2.20514409949722	Na	Mo	5.429304	5.457756	7.712397	90.0	90.0	90.0	orthorhombic	orthorhombic	1	2
1053	NaMoO3	681813	Mo	Na	-1.981226124	OrthoPerovskite_GdFeO3	-2.0672855	test	-1.9123898744583132	-2.036107610724969			5.551857	5.613925	8.372182	90.0	90.0	90.0	orthorhombic	other	4	4
1054	NaNbO3	681356	Na	Nb	-2.6864356889999996	OrthoPerovskite_GdFeO3	-2.5027209999999998	test	-2.5179762840271	-2.495597770099587	Na	Nb	5.470494	5.567753	7.805650999999999	90.0	90.0	90.0	orthorhombic	orthorhombic	0	3
1055	NaNbO3	681357	Nb	Na	-2.491521208	OrthoPerovskite_GdFeO3	-2.4648623	test	-2.317188262939453	-2.4556476509735266			5.522397	5.707568	8.306526	90.0	90.0	90.0	orthorhombic	other	4	4
1056	NaNiO3	693446	Na	Ni	-0.7005906040000001	OrthoPerovskite_GdFeO3	-0.785506	train	-0.7403817176818848	-0.6835190718067631	Na	Ni	5.3757589999999995	5.586583	6.793092999999999	90.0	90.0	90.0	orthorhombic	orthorhombic	0	1
1057	NaNpO3	682334	Np	Na	-2.625918835	OrthoPerovskite_GdFeO3	-2.5440742999999997	train	-2.617877244949341	-2.539235540579179			5.4748790000000005	5.676808	8.546291	90.0	90.0	90.0	orthorhombic	other	3	3
1058	NaNpO3	682335	Na	Np	-2.85060554	OrthoPerovskite_GdFeO3	-2.9414582	train	-2.7383625507354736	-2.958572024499088	Na	Np	5.654539	5.9369510000000005	8.208029	90.0	90.0	90.0	orthorhombic	orthorhombic	0	0
1059	NaOsO3	682146	Na	Os	-1.502308564	OrthoPerovskite_GdFeO3	-1.5116829	train	-1.2933191061019895	-1.4498119889326433	Na	Os	5.3115190000000005	5.389073000000001	7.557225999999999	90.0	90.0	90.0	orthorhombic	orthorhombic	0	2
1060	NaOsO3	682147	Os	Na	-1.204577048	OrthoPerovskite_GdFeO3	-1.1958897	train	-1.1414750814437866	-1.1165735005746185			5.242584	5.7012160000000005	8.363859	90.0	90.0	90.0	orthorhombic	other	5	5
1061	NaPaO3	682260	Na	Pa	-2.9153087810000002	OrthoPerovskite_GdFeO3	-2.952136	train	-2.836303234100342	-2.9698396956553674	Na	Pa	5.794361	6.009882	8.359318	90.0	90.0	90.0	orthorhombic	orthorhombic	0	1
1062	NaPaO3	682261	Pa	Na	-2.758864027	OrthoPerovskite_GdFeO3	-2.759105	train	-2.7121899127960205	-2.7661451302048197			5.442431	5.713893	8.898432000000001	90.0	90.0	90.0	orthorhombic	other	3	3
1063	NaPbO3	682713	Pb	Na	-0.912417136	OrthoPerovskite_GdFeO3	-1.0062147	train	-0.9682798981666564	-0.9164203298308901			5.682608999999999	5.7173110000000005	8.220701	90.0	90.0	90.0	orthorhombic	other	4	2
1064	NaPbO3	682714	Na	Pb	-1.065093467	OrthoPerovskite_GdFeO3	-1.2061226	train	-0.9448903799057008	-1.1273716942264098			5.872815	6.047461	7.408858	90.0	90.0	90.0	orthorhombic	other	0	0
1065	NaPdO3	693295	Na	Pd	-0.809354915	OrthoPerovskite_GdFeO3	-0.8796148000000001	test	-0.9095438718795776	-0.7828267017784905	Na	Pd	5.274311	5.452223	7.546533999999999	90.0	90.0	90.0	orthorhombic	orthorhombic	0	0
1066	NaPtO3	682092	Na	Pt	-1.005042119	OrthoPerovskite_GdFeO3	-0.97143084	train	-0.983653724193573	-0.8797149133568901	Na	Pt	5.2768440000000005	5.463605	7.579911999999999	90.0	90.0	90.0	orthorhombic	orthorhombic	0	1
1067	NaPtO3	682093	Pt	Na	-0.666087632	OrthoPerovskite_GdFeO3	-0.7492208	train	-0.8364917039871216	-0.6452293771655593			5.475533	5.50433	8.18498	90.0	90.0	90.0	orthorhombic	other	5	5
1068	NaPuO3	682294	Na	Pu	-2.631166757	OrthoPerovskite_GdFeO3	-2.6414857000000005	train	-2.7456068992614746	-2.6420282152942747	Na	Pu	5.739795	5.841784	8.218643	90.0	90.0	90.0	orthorhombic	orthorhombic	0	0
1069	NaPuO3	682295	Pu	Na	-2.330838206	OrthoPerovskite_GdFeO3	-2.332925	train	-2.6412060260772705	-2.3164217702071284	Pu	Na	5.8368150000000005	6.089762	7.434113000000001	90.0	90.0	90.0	orthorhombic	orthorhombic	4	4
1070	NaReO3	682014	Na	Re	-1.929736611	OrthoPerovskite_GdFeO3	-1.934092	test	-1.801297307014465	-1.8955561340018647	Na	Re	5.406837	5.445936	7.6695	90.0	90.0	90.0	orthorhombic	orthorhombic	1	0
1071	NaReO3	682015	Re	Na	-1.547412316	OrthoPerovskite_GdFeO3	-1.5104643999999998	test	-1.4485177993774414	-1.4485261756280365			5.32719	5.767419	8.153084	90.0	90.0	90.0	orthorhombic	other	5	4
1072	NaRhO3	682326	Na	Rh	-1.138637381	OrthoPerovskite_GdFeO3	-1.2666413	train	-1.0662608146667478	-1.19123361432283	Na	Rh	5.2439290000000005	5.389053	7.530346000000001	90.0	90.0	90.0	orthorhombic	orthorhombic	0	0
1073	NaRhO3	682327	Rh	Na	-0.9052897040000001	OrthoPerovskite_GdFeO3	-0.9945063000000001	train	-0.8869478702545166	-0.9040651254848463			5.410933	5.496341	8.365236999999999	90.0	90.0	90.0	orthorhombic	other	5	5
1074	NaRuO3	681898	Na	Ru	-1.416370476	OrthoPerovskite_GdFeO3	-1.4495008	train	-1.3329200744628906	-1.3841947780271282	Na	Ru	5.287559	5.3771059999999995	7.547103999999999	90.0	90.0	90.0	orthorhombic	orthorhombic	0	1
1075	NaRuO3	681899	Ru	Na	-1.20302366	OrthoPerovskite_GdFeO3	-1.1443012	train	-1.2114262580871582	-1.0621351093848843			5.361473	5.519426	8.471589999999999	90.0	90.0	90.0	orthorhombic	other	4	5
1076	NaSbO3	681872	Na	Sb	-1.831806716	OrthoPerovskite_GdFeO3	-1.8187608	test	-1.7340877056121826	-1.7738537200533788	Na	Sb	5.420052	5.486203	7.719287	90.0	90.0	90.0	orthorhombic	orthorhombic	0	1
1077	NaSbO3	681873	Sb	Na	-1.628161531	OrthoPerovskite_GdFeO3	-1.6107215	test	-1.3311755657196045	-1.5543217546688752			4.780461	5.215349	10.06367	90.0	90.0	90.0	orthorhombic	other	4	4
1078	NaScO3	682639	Sc	Na	-2.071660111	OrthoPerovskite_GdFeO3	-2.1369696	train	-2.1752891540527344	-2.1096412528255253			5.480538	5.484164	8.514985000000001	90.0	90.0	90.0	tetragonal	other	4	4
1079	NaScO3	682640	Na	Sc	-2.135886151	OrthoPerovskite_GdFeO3	-2.2057905	train	-2.219834804534912	-2.182264009374554	Na	Sc	5.544521	5.803527	7.941239	90.0	90.0	90.0	orthorhombic	orthorhombic	0	3
1080	NaSiO3	682952	Na	Si	-2.220097088	OrthoPerovskite_GdFeO3	-2.272682	train	-2.261341094970703	-2.2528507805399904	Na	Si	3.526417	3.52790652	3.52787863	89.98866532000002	90.0	90.0	cubic	cubic	1	4
1081	NaSiO3	682953	Si	Na	-2.28340206	OrthoPerovskite_GdFeO3	-2.3258946	train	-2.1019332408905034	-2.3090029914983017			4.918378	5.455632	8.441545	90.0	90.0	90.0	orthorhombic	other	0	0
1082	NaSmO3	693575	Na	Sm	-2.245123921	OrthoPerovskite_GdFeO3	-2.2625203	train	-2.3201618194580083	-2.2421277201728014			6.111231	6.2449900000000005	7.074764	90.0	90.0	90.0	orthorhombic	other	0	0
1083	NaSnO3	682384	Na	Sn	-1.560473681	OrthoPerovskite_GdFeO3	-1.6218196000000002	train	-1.705244064331055	-1.5660329443577168	Na	Sn	5.584698	5.682176999999999	7.912513000000001	90.0	90.0	90.0	orthorhombic	orthorhombic	0	0
1084	NaSnO3	682385	Sn	Na	-1.427194039	OrthoPerovskite_GdFeO3	-1.4735961000000002	train	-1.4330199956893919	-1.4096211689327371			5.6595889999999995	5.97088	7.82308	90.0	90.0	90.0	orthorhombic	other	4	4
1085	NaTaO3	681716	Na	Ta	-2.9315214189999996	OrthoPerovskite_GdFeO3	-2.9136639	train	-2.6006667613983154	-2.9292422906195443	Na	Ta	5.466074	5.533936	7.7837380000000005	90.0	90.0	90.0	orthorhombic	orthorhombic	0	2
1086	NaTaO3	681717	Ta	Na	-2.633072677	OrthoPerovskite_GdFeO3	-2.6310973	train	-2.425722599029541	-2.6310659313931053			5.468007	5.632048999999999	8.351272999999999	90.0	90.0	90.0	orthorhombic	other	4	4
1087	NaTbO3	693558	Na	Tb	-2.170777911	OrthoPerovskite_GdFeO3	-2.2506845	train	-2.224912166595459	-2.229638077898972			6.022522	6.163053	7.084113	90.0	90.0	90.0	orthorhombic	other	0	0
1088	NaTcO3	681620	Na	Tc	-1.843065874	OrthoPerovskite_GdFeO3	-1.7915857	test	-1.6915559768676758	-1.7451773924916132	Na	Tc	5.367344999999999	5.4109419999999995	7.623772	90.0	90.0	90.0	orthorhombic	orthorhombic	1	1
1089	NaTcO3	681621	Tc	Na	-1.582653769	OrthoPerovskite_GdFeO3	-1.42761	test	-1.4955807924270632	-1.3610946697887372			5.4200040000000005	5.598762000000001	8.344074	90.0	90.0	90.0	orthorhombic	other	4	5
1090	NaTeO3	682870	Na	Te	-1.489454639	OrthoPerovskite_GdFeO3	-1.5391618999999999	train	-1.4236128330230713	-1.4788090047695583	Na	Te	5.546227	5.651801	7.910528	90.0	90.0	90.0	orthorhombic	orthorhombic	0	1
1091	NaTeO3	682871	Te	Na	-1.363382632	OrthoPerovskite_GdFeO3	-1.4031432	train	-1.2906274795532229	-1.3352762561973166			5.580906	5.826933	8.446326	90.0	90.0	90.0	orthorhombic	other	4	4
1092	NaThO3	693217	Na	Th	-2.804771464	OrthoPerovskite_GdFeO3	-2.8015647	train	-2.671319961547852	-2.8109504212754803	Na	Th	5.962769000000001	6.18237	8.53223	90.0	90.0	90.0	orthorhombic	orthorhombic	0	0
1093	NaTiO3	682174	Na	Ti	-2.458365863	OrthoPerovskite_GdFeO3	-2.5100572	train	-2.476186752319336	-2.50333924204481	Na	Ti	5.4352480000000005	5.462267	7.6995119999999995	90.0	90.0	90.0	tetragonal	tetragonal	1	0
1094	NaTiO3	682175	Ti	Na	-2.361196182	OrthoPerovskite_GdFeO3	-2.3913205	train	-2.4937608242034908	-2.3780431988728217			5.592335	5.673279	7.931367999999999	90.0	90.0	90.0	orthorhombic	other	4	4
1095	NaTmO3	693372	Na	Tm	-2.140674144	OrthoPerovskite_GdFeO3	-2.1444263	test	-2.311824321746826	-2.1175098815234814			5.918788	5.985907	7.668205	90.0	90.0	90.0	orthorhombic	other	0	2
1096	NaUO3	682198	Na	U	-3.1040841410000004	OrthoPerovskite_GdFeO3	-3.1066399	train	-3.124776601791382	-3.132878817718222	Na	U	5.726395	5.946795	8.251553	90.0	90.0	90.0	orthorhombic	orthorhombic	0	0
1097	NaUO3	682199	U	Na	-2.8697715460000004	OrthoPerovskite_GdFeO3	-2.869988	train	-2.98052716255188	-2.8831536133026288			5.48262	5.7400910000000005	8.364765	90.0	90.0	90.0	orthorhombic	other	4	4
1098	NaVO3	681493	Na	V	-2.2276058009999997	OrthoPerovskite_GdFeO3	-2.2403548	train	-2.1922032833099365	-2.2187377367478898	Na	V	5.212022	5.235380999999999	7.40234	90.0	90.0	90.0	tetragonal	tetragonal	2	4
1099	NaVO3	681494	V	Na	-2.232668166	OrthoPerovskite_GdFeO3	-2.2923419999999997	train	-2.231501817703247	-2.273596853226542			5.30471	5.535051	8.477752	90.0	90.0	90.0	orthorhombic	other	1	0
1100	NaWO3	681820	Na	W	-2.378363937	OrthoPerovskite_GdFeO3	-2.5214338	test	-2.144962310791016	-2.515344316842665	Na	W	5.448494	5.491868	7.746509	90.0	90.0	90.0	orthorhombic	orthorhombic	1	0
1101	NaWO3	681821	W	Na	-2.028293181	OrthoPerovskite_GdFeO3	-2.115982	test	-1.9630920886993408	-2.0874942398491125			5.444013	5.750324	8.333559	90.0	90.0	90.0	orthorhombic	other	4	4
1102	NaYO3	693478	Na	Y	-2.300552466	OrthoPerovskite_GdFeO3	-2.3328330000000004	test	-2.2713394165039062	-2.316324687873092			6.05969	6.126176	7.015064	90.0	90.0	90.0	orthorhombic	other	0	0
1103	NaYbO3	682532	Na	Yb	-1.83420333	OrthoPerovskite_GdFeO3	-1.9702387	test	-1.922162175178528	-1.9336996775206328			5.995667	6.187442	6.967975	90.0	90.0	90.0	orthorhombic	other	0	0
1104	NaYbO3	682533	Yb	Na	-1.791322556	OrthoPerovskite_GdFeO3	-1.7602438999999999	test	-1.9166179895401	-1.7121041849164673			5.8792860000000005	6.219325	7.2097690000000005	90.0	90.0	90.0	orthorhombic	other	1	1
1105	NaZrO3	682006	Na	Zr	-2.589849236	OrthoPerovskite_GdFeO3	-2.6809819999999998	test	-2.6972899436950684	-2.683706399966189	Na	Zr	5.659243	5.81688	8.069844	90.0	90.0	90.0	orthorhombic	orthorhombic	0	0
1106	NaZrO3	682007	Zr	Na	-2.520641981	OrthoPerovskite_GdFeO3	-2.5392144	test	-2.5362558364868164	-2.5341071662836874			5.2298	5.344208	9.525225	90.0	90.0	90.0	orthorhombic	other	4	3
1107	NbAgO3	681509	Nb	Ag	-1.870177992	OrthoPerovskite_GdFeO3	-1.960963	train	-1.6244347095489502	-1.9239115622399283			5.5705849999999995	5.888169	8.565178999999999	90.0	90.0	89.999835	orthorhombic	other	4	4
1108	NbAgO3	681510	Ag	Nb	-2.007481893	OrthoPerovskite_GdFeO3	-1.9947846000000002	train	-1.9238008260726929	-1.9596015608144697			5.512669	5.608937	7.889792	90.0	90.0	90.0	orthorhombic	other	1	3
1109	NbAuO3	693169	Au	Nb	-1.698593575	OrthoPerovskite_GdFeO3	-1.7543811999999999	train	-1.8451614379882808	-1.7059176131799745			5.501180000000001	5.654833999999999	7.936648	90.0	90.0	90.0	orthorhombic	other	1	2
1110	NbBiO3	693297	Bi	Nb	-1.8738982030000002	OrthoPerovskite_GdFeO3	-1.9457741000000002	test	-2.1563096046447754	-1.9078835854632876	Bi	Nb	5.63955	5.710458	8.246245	90.0	90.0	90.0	orthorhombic	orthorhombic	0	1
1111	NbCdO3	682056	Nb	Cd	-1.8674183569999998	OrthoPerovskite_GdFeO3	-1.8353868999999998	train	-1.9062905311584477	-1.7913982917265159			5.647586	5.875856	7.717617999999999	90.0	90.0	90.0	orthorhombic	other	4	4
1112	NbCdO3	682057	Cd	Nb	-2.097833229	OrthoPerovskite_GdFeO3	-2.1373342999999996	train	-2.191873073577881	-2.11002609986056	Cd	Nb	5.562191	5.586486	7.8949229999999995	90.0	90.0	90.0	tetragonal	tetragonal	0	1
1113	NbCrO3	682422	Cr	Nb	-2.348424865	OrthoPerovskite_GdFeO3	-2.3545275	train	-2.344640016555786	-2.3392176519574455			5.2307559999999995	5.565879	7.714767999999999	90.0	90.0	90.0	orthorhombic	other	0	0
1114	NbCrO3	682423	Nb	Cr	-2.264579515	OrthoPerovskite_GdFeO3	-2.236724	train	-2.221726894378662	-2.214906361330274	Nb	Cr	5.34835	5.686969	7.174314999999999	90.0	90.0	90.0	orthorhombic	orthorhombic	2	3
1115	NbCuO3	682350	Nb	Cu	-1.951955313	OrthoPerovskite_GdFeO3	-2.039257	train	-1.8343896865844729	-2.0065307389907363			5.058987999999999	5.319582	7.863059	90.0	90.0	90.0	orthorhombic	other	4	4
1116	NbCuO3	682351	Cu	Nb	-2.105182531	OrthoPerovskite_GdFeO3	-2.1387098	train	-2.0734896659851074	-2.111477586278686			5.263512	5.503263	7.730256	90.0	90.0	90.0	orthorhombic	other	1	2
1117	NbFeO3	693356	Fe	Nb	-2.137321042	OrthoPerovskite_GdFeO3	-2.2315478	train	-2.109747648239136	-2.2094442137493924			5.288952	5.447794999999999	7.654313	90.0	90.0	90.0	orthorhombic	other	0	0
1118	NbGaO3	682248	Nb	Ga	-1.915656325	OrthoPerovskite_GdFeO3	-2.0258167	train	-2.166452646255493	-1.9923479597064504	Nb	Ga	5.316749	5.486125	7.240898	90.0	90.0	90.0	orthorhombic	orthorhombic	4	4
1119	NbGaO3	682249	Ga	Nb	-2.154689753	OrthoPerovskite_GdFeO3	-2.1678772	train	-2.2515687942504883	-2.142256273993728	Ga	Nb	5.6555550000000006	5.661633999999999	7.9961009999999995	90.0	90.0	90.0	tetragonal	tetragonal	2	1
1120	NbGeO3	693241	Ge	Nb	-1.969601532	OrthoPerovskite_GdFeO3	-1.9922549999999999	train	-2.060662746429444	-1.956932218725563			5.30975	5.8118620000000005	7.795355000000001	90.0	90.0	90.0	orthorhombic	other	0	1
1121	NbHgO3	681762	Nb	Hg	-1.753211324	OrthoPerovskite_GdFeO3	-1.7612896	train	-1.8414009809494016	-1.7132076522719266			5.568264	6.2634669999999995	9.405802	90.0	90.0	90.0	orthorhombic	other	4	4
1122	NbHgO3	681763	Hg	Nb	-1.85252444	OrthoPerovskite_GdFeO3	-1.8824855999999999	train	-1.7953634262084959	-1.8410988539667037	Hg	Nb	4.030513	4.03421278	4.03421278	90.93626768	90.0	90.0	cubic	cubic	2	2
1123	NbInO3	682136	Nb	In	-1.78079927	OrthoPerovskite_GdFeO3	-1.771768	train	-1.821585178375244	-1.7242649080216095			5.6409709999999995	5.915166	7.5252479999999995	90.0	90.0	90.0	orthorhombic	other	4	4
1124	NbInO3	682137	In	Nb	-2.015544444	OrthoPerovskite_GdFeO3	-1.9996545	train	-2.100806713104248	-1.9647404875375742	In	Nb	5.629807	5.741428	8.040641	90.0	90.0	90.0	orthorhombic	orthorhombic	3	2
1125	NbPbO3	681424	Pb	Nb	-2.1734606380000003	OrthoPerovskite_GdFeO3	-2.2044303	train	-2.2323248386383057	-2.1808286681706757	Pb	Nb	5.7393529999999995	5.763552	8.148087	90.0	90.0	90.0	tetragonal	tetragonal	0	1
1126	NbPdO3	693363	Pd	Nb	-1.759554817	OrthoPerovskite_GdFeO3	-1.7897546999999998	train	-2.0537981986999507	-1.7432452429957292			5.391380000000001	5.630058	7.754637	90.0	90.0	90.0	orthorhombic	other	0	0
1127	NbSnO3	682210	Nb	Sn	-1.960544655	OrthoPerovskite_GdFeO3	-2.0085986	train	-1.9096021652221682	-1.974178684318642			5.7347779999999995	6.622458999999999	6.810997	90.0	90.0	90.0	orthorhombic	other	4	4
1128	NbSnO3	682211	Sn	Nb	-2.103223381	OrthoPerovskite_GdFeO3	-2.1089267999999994	train	-2.073070287704468	-2.080049291119806	Sn	Nb	5.659315	5.768452	8.126431	90.0	90.0	90.0	orthorhombic	orthorhombic	1	2
1129	NbTlO3	681373	Tl	Nb	-2.203155068	OrthoPerovskite_GdFeO3	-2.2334718999999996	train	-2.0858917236328125	-2.21147460634635	Tl	Nb	4.07313251	4.07313251	4.074091	90.0	90.0	90.10095904000002	cubic	cubic	2	1
1130	NbZnO3	693206	Zn	Nb	-2.1279289319999997	OrthoPerovskite_GdFeO3	-2.1729906000000003	train	-2.075552701950073	-2.147652152329202			5.321448999999999	5.343067	7.764639999999999	90.0	90.0	90.0	tetragonal	other	1	1
1131	NdAgO3	693279	Nd	Ag	-1.902865166	OrthoPerovskite_GdFeO3	-1.9933732	test	-2.060569524765014	-1.9581121911812143	Nd	Ag	5.5688059999999995	5.992075	7.9687399999999995	90.0	90.0	90.0	orthorhombic	orthorhombic	0	0
1132	NdAlO3	682406	Nd	Al	-3.512344775	OrthoPerovskite_GdFeO3	-3.5400894	train	-3.446059226989746	-3.5902732649689595	Nd	Al	5.309605	5.340448	7.516299000000001	90.0	90.0	90.0	orthorhombic	orthorhombic	1	0
1133	NdAlO3	682407	Al	Nd	-3.2325204739999998	OrthoPerovskite_GdFeO3	-3.1511939	train	-3.3875699043273926	-3.179894103703808			5.494611	5.509494999999999	8.659936	90.0	90.0	90.0	tetragonal	other	4	5
1134	NdAuO3	693578	Nd	Au	-1.9425277090000002	OrthoPerovskite_GdFeO3	-1.9897470000000002	train	-1.9923131465911863	-1.9542856698803002	Nd	Au	5.681903	6.525335	7.376886	90.0	90.0	90.0	orthorhombic	orthorhombic	0	0
1135	NdBeO3	682480	Be	Nd	-2.255064789	OrthoPerovskite_GdFeO3	-2.237219	train	-2.4319543838500977	-2.2154287064971023			5.190164	5.5132330000000005	8.334539999999999	90.0	90.0	90.0	orthorhombic	other	4	4
1136	NdCoO3	682643	Nd	Co	-2.455721472	OrthoPerovskite_GdFeO3	-2.4063357999999995	train	-2.5258054733276367	-2.393887985506106	Nd	Co	5.348017	5.4848930000000005	7.670959	90.0	90.0	90.0	orthorhombic	orthorhombic	0	0
1137	NdCoO3	682644	Co	Nd	-2.265768106	OrthoPerovskite_GdFeO3	-2.3117902000000004	train	-2.4020977020263667	-2.294119425496257			5.534793	5.692575	8.611082000000001	90.0	90.0	90.0	orthorhombic	other	4	4
1138	NdCrO3	681504	Nd	Cr	-3.121720877	OrthoPerovskite_GdFeO3	-3.0923	test	-3.0329809188842773	-3.117746742045898	Nd	Cr	5.4263650000000005	5.60238	7.748132000000001	90.0	90.0	90.0	orthorhombic	orthorhombic	0	1
1139	NdCuO3	681714	Nd	Cu	-2.184960423	OrthoPerovskite_GdFeO3	-2.1822658	train	-2.306931495666504	-2.1574397399885257	Nd	Cu	5.372532	5.466499	7.62707	90.0	90.0	90.0	orthorhombic	orthorhombic	0	2
1140	NdCuO3	681715	Cu	Nd	-1.896835743	OrthoPerovskite_GdFeO3	-1.9541292000000001	train	-2.1013524532318115	-1.9167002442579673			5.661387	5.7308449999999995	8.255339	90.0	90.0	90.0	orthorhombic	other	5	5
1141	NdFeO3	681760	Nd	Fe	-2.705950207	OrthoPerovskite_GdFeO3	-2.6978521	train	-2.8370342254638667	-2.7015084508730762	Nd	Fe	5.430865	5.647848000000001	7.768764999999999	90.0	90.0	90.0	orthorhombic	orthorhombic	0	1
1142	NdFeO3	681761	Fe	Nd	-2.506329415	OrthoPerovskite_GdFeO3	-2.4200656000000005	train	-2.6226935386657715	-2.4083762575697807			5.643614	5.648343	8.609779	90.0	90.0	90.0	tetragonal	other	4	5
1143	NdGaO3	681827	Ga	Nd	-2.7021237680000003	OrthoPerovskite_GdFeO3	-2.71693	train	-2.906846284866333	-2.721640266748293			5.604214	5.650035	8.620401	90.0	90.0	90.0	orthorhombic	other	4	4
1144	NdGeO3	693087	Nd	Ge	-2.509513415	OrthoPerovskite_GdFeO3	-2.501792	test	-2.611140251159668	-2.4946174495743683	Nd	Ge	5.500399	5.835036	7.934789	90.0	90.0	90.0	orthorhombic	orthorhombic	0	0
1145	NdHfO3	681772	Nd	Hf	-3.385956485	OrthoPerovskite_GdFeO3	-3.3740726000000003	train	-3.37813401222229	-3.4150852385198895	Nd	Hf	5.6279449999999995	5.939958	7.996186	90.0	90.0	90.0	orthorhombic	orthorhombic	0	0
1146	NdHfO3	681773	Hf	Nd	-3.226062326	OrthoPerovskite_GdFeO3	-3.2219641	train	-3.316159963607788	-3.2545738449673793			6.019097	6.14082	7.5886309999999995	90.0	90.0	90.0	orthorhombic	other	4	3
1147	NdInO3	693288	Nd	In	-2.719639158	OrthoPerovskite_GdFeO3	-2.727763	train	-2.7046518325805664	-2.733071711581122	Nd	In	5.64271	5.947096	8.183027000000001	90.0	90.0	90.0	orthorhombic	orthorhombic	0	0
1148	NdIrO3	693568	Nd	Ir	-2.202485949	OrthoPerovskite_GdFeO3	-2.2305722	train	-2.08383584022522	-2.208414718911498	Nd	Ir	5.367957	5.918238	7.797092999999999	90.0	90.0	90.0	orthorhombic	orthorhombic	0	0
1149	NdLuO3	693424	Nd	Lu	-3.7691768389999996	OrthoPerovskite_GdFeO3	-3.6832453999999997	train	-3.717965841293335	-3.7413375977012073	Nd	Lu	5.698944	5.950202	8.258161	90.0	90.0	90.0	orthorhombic	orthorhombic	0	0
1150	NdMgO3	682717	Mg	Nd	-2.762419627	OrthoPerovskite_GdFeO3	-2.7434277999999996	train	-2.839627742767334	-2.7496018783878506			5.633071	5.853726999999999	8.447472	90.0	90.0	90.0	orthorhombic	other	2	2
1151	NdMgO3	682718	Nd	Mg	-2.857491492	OrthoPerovskite_GdFeO3	-2.8876939999999998	train	-2.9321777820587163	-2.90183774163366	Nd	Mg	5.382982	5.771491999999999	7.750521000000001	90.0	90.0	90.0	orthorhombic	orthorhombic	0	0
1152	NdMnO3	682270	Mn	Nd	-2.578772153	OrthoPerovskite_GdFeO3	-2.5400307	train	-2.730899810791016	-2.5349685609497112			5.75357	5.798662	8.19999	90.0	90.0	90.0	orthorhombic	other	4	4
1153	NdMnO3	682271	Nd	Mn	-2.884688751	OrthoPerovskite_GdFeO3	-2.7837126	train	-2.9326205253601074	-2.7921121219770266	Nd	Mn	5.428193	5.714894	7.715577000000001	90.0	90.0	90.0	orthorhombic	orthorhombic	0	1
1154	NdMoO3	693273	Nd	Mo	-2.611824596	OrthoPerovskite_GdFeO3	-2.673542	train	-2.5318081378936768	-2.6758553938223466	Nd	Mo	5.510694	5.905480000000001	7.950245	90.0	90.0	90.0	orthorhombic	orthorhombic	0	0
1155	NdNbO3	693223	Nd	Nb	-2.927770212	OrthoPerovskite_GdFeO3	-2.8866853999999997	train	-2.869702816009521	-2.900773423784644	Nd	Nb	5.512778	6.0222690000000005	7.845389	90.0	90.0	90.0	orthorhombic	orthorhombic	0	0
1156	NdNiO3	682352	Ni	Nd	-2.0107124240000003	OrthoPerovskite_GdFeO3	-2.1002712000000003	test	-1.9938908815383911	-2.0709155318753654			5.730156	5.838228	8.029578	90.0	90.0	90.0	orthorhombic	other	3	4
1157	NdNiO3	682353	Nd	Ni	-2.328171555	OrthoPerovskite_GdFeO3	-2.3460944	test	-2.403637170791626	-2.330318684227387	Nd	Ni	5.36998	5.420267	7.619591000000001	90.0	90.0	90.0	orthorhombic	orthorhombic	0	0
1158	NdPdO3	693142	Nd	Pd	-2.142044248	OrthoPerovskite_GdFeO3	-2.1739933	train	-2.204645156860352	-2.148710244245926	Nd	Pd	5.5168349999999995	5.950557	7.725639999999999	90.0	90.0	90.0	orthorhombic	orthorhombic	0	1
1159	NdRhO3	682452	Rh	Nd	-1.949668255	OrthoPerovskite_GdFeO3	-2.0115626	train	-1.893544316291809	-1.9773064238630433			5.486905	5.883249	8.459975	90.0	90.0	90.0	orthorhombic	other	4	3
1160	NdRhO3	682453	Nd	Rh	-2.336132406	OrthoPerovskite_GdFeO3	-2.3487728	train	-2.2765746116638184	-2.33314504643917	Nd	Rh	5.385028	5.838722	7.792961	90.0	90.0	90.0	orthorhombic	orthorhombic	0	0
1161	NdRuO3	693151	Nd	Ru	-2.339366342	OrthoPerovskite_GdFeO3	-2.358514	train	-2.30684494972229	-2.343424377225245	Nd	Ru	5.347035	5.8880230000000005	7.771807000000001	90.0	90.0	90.0	orthorhombic	orthorhombic	0	0
1162	NdScO3	681539	Sc	Nd	-3.5063580030000003	OrthoPerovskite_GdFeO3	-3.287461	train	-3.496464490890503	-3.323688974577949			5.767564	5.890264	8.44977	90.0	90.0	90.0	orthorhombic	other	2	4
1163	NdScO3	681540	Nd	Sc	-3.7359452060000002	OrthoPerovskite_GdFeO3	-3.4356027	train	-3.751099824905396	-3.480014431145057	Nd	Sc	5.565355	5.802318	8.003803	90.0	90.0	90.0	orthorhombic	orthorhombic	0	1
1164	NdTaO3	693382	Nd	Ta	-2.9292265	OrthoPerovskite_GdFeO3	-2.8744577999999996	train	-2.883641242980957	-2.887870337396949	Nd	Ta	5.498888	6.014665	7.792489999999999	90.0	90.0	90.0	orthorhombic	orthorhombic	0	1
1165	NdTcO3	693154	Nd	Tc	-2.4687512380000003	OrthoPerovskite_GdFeO3	-2.4636636000000003	test	-2.416607618331909	-2.4543827314755933	Nd	Tc	5.390332	5.917546	7.804892	90.0	90.0	90.0	orthorhombic	orthorhombic	0	0
1166	NdTiO3	681674	Nd	Ti	-3.3961137439999995	OrthoPerovskite_GdFeO3	-3.2316976000000004	train	-3.3965463638305664	-3.264845050384193	Nd	Ti	5.457284	5.700266	7.803967999999999	90.0	90.0	90.0	orthorhombic	orthorhombic	0	1
1167	NdTiO3	681675	Ti	Nd	-3.1188718939999998	OrthoPerovskite_GdFeO3	-2.9877841	train	-3.229101181030273	-3.0074570951333666			5.719366	5.801437	8.268626	90.0	90.0	90.0	orthorhombic	other	4	5
1168	NdTlO3	682606	Tl	Nd	-2.164334808	OrthoPerovskite_GdFeO3	-2.2253532000000003	test	-2.2168281078338623	-2.202907406940435			5.954921	6.035881	8.701735000000001	90.0	90.0	90.0	orthorhombic	other	1	1
1169	NdTlO3	682607	Nd	Tl	-2.226185133	OrthoPerovskite_GdFeO3	-2.2629669999999997	test	-2.223730087280273	-2.24259909711426	Nd	Tl	5.739293	6.112679	8.438569000000001	90.0	90.0	90.0	orthorhombic	orthorhombic	0	0
1170	NdVO3	681610	Nd	V	-3.195967867	OrthoPerovskite_GdFeO3	-2.9478322999999995	train	-3.1249454021453857	-2.965298247383693	Nd	V	5.452914	5.702654	7.776256	90.0	90.0	90.0	orthorhombic	orthorhombic	0	0
1171	NdVO3	681611	V	Nd	-2.912203375	OrthoPerovskite_GdFeO3	-2.8647177000000004	train	-2.92795991897583	-2.877592167377912			5.687	5.807513	8.392089	90.0	90.0	90.0	orthorhombic	other	4	2
1172	NdZnO3	681591	Zn	Nd	-2.275377836	OrthoPerovskite_GdFeO3	-2.2485516	train	-2.27126407623291	-2.2273873506134607			5.457947	5.847064	8.694077	90.0	90.0	90.0	orthorhombic	other	1	2
1173	NdZrO3	693172	Nd	Zr	-3.332272123	OrthoPerovskite_GdFeO3	-3.2476156	train	-3.3256735801696777	-3.281642404658075	Nd	Zr	5.642901	6.144439	7.8575550000000005	90.0	90.0	90.0	orthorhombic	orthorhombic	0	2
1174	NiAgO3	682679	Ni	Ag	-0.37245280299999994	OrthoPerovskite_GdFeO3	-0.31808179999999997	train	-0.34718847274780273	-0.19027306831473403			5.121923000000001	5.322831	7.740985	90.0	90.0	90.0	orthorhombic	other	1	1
1175	NiAgO3	682680	Ag	Ni	-0.37667505799999995	OrthoPerovskite_GdFeO3	-0.39218712	train	-0.4192748069763184	-0.26847217081626895	Ag	Ni	5.117523	5.377216000000001	7.4102429999999995	90.0	90.0	90.0	orthorhombic	orthorhombic	0	0
1176	NiBiO3	682310	Ni	Bi	-1.1106938579999999	OrthoPerovskite_GdFeO3	-1.1440907	train	-0.8633494377136229	-1.0619129807836372			5.510457	5.6409139999999995	8.045684	90.0	90.0	90.0	orthorhombic	other	2	3
1177	NiBiO3	682311	Bi	Ni	-1.233009326	OrthoPerovskite_GdFeO3	-1.2399145	train	-1.0308818817138672	-1.163030352090941	Bi	Ni	5.330198	5.670594	7.665659	90.0	90.0	90.0	orthorhombic	orthorhombic	0	0
1178	NiHgO3	682671	Ni	Hg	-0.32861549100000004	OrthoPerovskite_GdFeO3	-0.68330425	test	-0.29601800441741943	-0.5756714149302224			5.311274	5.468573999999999	8.022485000000001	90.0	90.0	90.0	orthorhombic	other	2	0
1179	NiHgO3	682672	Hg	Ni	-0.42616263	OrthoPerovskite_GdFeO3	-0.5958968000000001	test	-0.4006160497665405	-0.4834353360367264			5.383725	5.488157	7.448855	90.0	90.0	90.0	orthorhombic	other	0	2
1180	NiPbO3	682730	Pb	Ni	-1.163071237	OrthoPerovskite_GdFeO3	-1.2819506999999999	test	-0.9472653865814208	-1.2073887478522038			5.264204	5.4789699999999995	7.756317999999999	90.0	90.0	90.0	orthorhombic	other	0	0
1181	NiPbO3	682731	Ni	Pb	-1.051519989	OrthoPerovskite_GdFeO3	-1.2462732	test	-0.7156641483306885	-1.1697403242370235			5.4290959999999995	5.509304	8.043061	90.0	90.0	90.0	orthorhombic	other	2	1
1182	NiPtO3	693039	Ni	Pt	-0.83806637	OrthoPerovskite_GdFeO3	-0.86973625	train	-0.6670887470245361	-0.7724024333991548			5.134323999999999	5.30072	7.427453999999999	90.0	90.0	90.0	orthorhombic	other	1	1
1183	NpAgO3	693140	Ag	Np	-2.245612334	OrthoPerovskite_GdFeO3	-2.3000827	train	-2.1300570964813232	-2.2817651708686983	Ag	Np	5.694158	6.0033959999999995	8.355692	90.0	90.0	90.0	orthorhombic	orthorhombic	0	0
1184	NpAlO3	681662	Np	Al	-3.5016885369999997	OrthoPerovskite_GdFeO3	-3.4492419	test	-3.396733283996582	-3.4944070982145594	Np	Al	5.312444	5.31348332	5.31348332	60.09978049000001	60.00647019	60.00647019000001	rhombohedral	rhombohedral	2	1
1185	NpAlO3	681663	Al	Np	-3.2344983239999996	OrthoPerovskite_GdFeO3	-3.1359055000000002	test	-3.560561180114746	-3.163761130272421			5.448182	5.459619	9.081511	90.0	90.0	90.0	tetragonal	other	3	3
1186	NpBeO3	682612	Np	Be	-3.0380887530000003	OrthoPerovskite_GdFeO3	-3.0453146	train	-3.1249308586120605	-3.0681657388105625	Np	Be	5.069142	5.0770800000000005	7.209599000000001	90.0	90.0	90.0	tetragonal	tetragonal	2	2
1187	NpBeO3	682613	Be	Np	-3.059487613	OrthoPerovskite_GdFeO3	-3.0856552	train	-2.8997795581817627	-3.110734864945817			5.184927	5.196893	8.34304	90.0	90.0	90.0	tetragonal	other	1	1
1188	NpCrO3	682964	Np	Cr	-3.082709145	OrthoPerovskite_GdFeO3	-3.1137642999999997	train	-3.1297733783721924	-3.1403967892466076	Np	Cr	5.441237	5.555135	7.7607539999999995	90.0	90.0	90.0	orthorhombic	orthorhombic	0	0
1189	NpCrO3	682965	Cr	Np	-2.848730145	OrthoPerovskite_GdFeO3	-2.8701557999999996	train	-2.8296499252319336	-2.883330683037969			5.473625	5.787317	8.448777	90.0	90.0	90.0	orthorhombic	other	3	3
1190	NpFeO3	693042	Np	Fe	-2.740254127	OrthoPerovskite_GdFeO3	-2.664902	train	-2.9486258029937744	-2.666738096364981	Np	Fe	5.35685	5.983293	7.508589	90.0	90.0	90.0	orthorhombic	orthorhombic	0	0
1191	NpGaO3	681989	Ga	Np	-2.550667082	OrthoPerovskite_GdFeO3	-2.4969945	train	-2.894251823425293	-2.489554922427179			5.70539	5.940656	8.256798	90.0	90.0	90.0	orthorhombic	other	3	3
1192	NpGeO3	693407	Np	Ge	-2.481941274	OrthoPerovskite_GdFeO3	-2.555221	train	-2.7535533905029297	-2.550998015066218	Np	Ge	5.546111	5.82141	7.95488	90.0	90.0	90.0	orthorhombic	orthorhombic	0	0
1193	NpHgO3	693289	Hg	Np	-2.241235204	OrthoPerovskite_GdFeO3	-2.2471947999999995	train	-2.20050048828125	-2.2259555972349703			5.870309	5.9561720000000005	8.615582	90.0	90.0	90.0	orthorhombic	other	0	0
1194	NpInO3	693512	Np	In	-2.6896881169999998	OrthoPerovskite_GdFeO3	-2.6487967999999995	test	-2.7571029663085938	-2.6497432006461885	Np	In	5.697047	6.006755	8.184069000000001	90.0	90.0	90.0	orthorhombic	orthorhombic	0	1
1195	NpMnO3	693043	Np	Mn	-2.828412408	OrthoPerovskite_GdFeO3	-2.7475526	train	-3.0337331295013428	-2.753954543729534	Np	Mn	5.431783	5.493098000000001	7.695367	90.0	90.0	90.0	orthorhombic	orthorhombic	1	1
1196	NpMoO3	693413	Np	Mo	-2.568283117	OrthoPerovskite_GdFeO3	-2.6813176	train	-2.633612155914306	-2.684060539436871	Np	Mo	5.373695	6.018733999999999	7.857432000000001	90.0	90.0	90.0	orthorhombic	orthorhombic	0	0
1197	NpNbO3	693159	Np	Nb	-2.895275909	OrthoPerovskite_GdFeO3	-2.806236	test	-2.888779401779175	-2.815879776786197	Np	Nb	5.490458	6.06185	7.820028	90.0	90.0	90.0	orthorhombic	orthorhombic	0	1
1198	NpNiO3	693383	Np	Ni	-2.621539496	OrthoPerovskite_GdFeO3	-2.5248977999999997	test	-2.8107359409332275	-2.5189996777677006	Np	Ni	5.276909	5.781854	7.550932	90.0	90.0	90.0	orthorhombic	orthorhombic	0	0
1199	NpPbO3	693462	Pb	Np	-2.6327647730000003	OrthoPerovskite_GdFeO3	-2.6419202999999998	train	-2.575155258178711	-2.6424868237983214	Pb	Np	6.006204	6.2035	8.628	90.0	90.0	90.0	orthorhombic	orthorhombic	0	0
1200	NpScO3	681928	Np	Sc	-3.712929337	OrthoPerovskite_GdFeO3	-3.6229544000000002	train	-3.7448537349700928	-3.677715956381529	Np	Sc	5.587473	5.8198669999999995	8.001628	90.0	90.0	90.0	orthorhombic	orthorhombic	0	0
1201	NpScO3	681929	Sc	Np	-3.478720108	OrthoPerovskite_GdFeO3	-3.5067763	train	-3.5487947463989262	-3.5551198573385236			5.815107	5.882423999999999	8.49045	90.0	90.0	90.0	orthorhombic	other	3	1
1202	NpTaO3	682715	Np	Ta	-2.88889098	OrthoPerovskite_GdFeO3	-2.9132476	train	-2.8665213584899902	-2.928802993058028	Np	Ta	5.487175	6.0243660000000006	7.7926	90.0	90.0	90.0	orthorhombic	orthorhombic	1	0
1203	NpTaO3	682716	Ta	Np	-2.7115122730000003	OrthoPerovskite_GdFeO3	-2.7128582000000003	train	-2.883711099624634	-2.7173435292729575			5.777031	6.6628940000000005	6.962011	90.0	90.0	90.0	orthorhombic	other	4	4
1204	NpTcO3	693579	Np	Tc	-2.456545965	OrthoPerovskite_GdFeO3	-2.4568380000000003	train	-2.482284545898437	-2.4471800664842744	Np	Tc	5.301	6.033532	7.764077	90.0	90.0	90.0	orthorhombic	orthorhombic	0	1
1205	NpTiO3	682504	Np	Ti	-3.37401178	OrthoPerovskite_GdFeO3	-3.3547924	test	-3.3676319122314453	-3.3947399470340676	Np	Ti	5.485362	5.712566000000001	7.849135	90.0	90.0	90.0	orthorhombic	orthorhombic	0	0
1206	NpTiO3	682505	Ti	Np	-3.106062531	OrthoPerovskite_GdFeO3	-3.0315478	test	-3.2615466117858887	-3.0536384227647217			5.65795	5.9272	8.307118	90.0	90.0	90.0	orthorhombic	other	3	3
1207	NpTlO3	682078	Np	Tl	-2.174777413	OrthoPerovskite_GdFeO3	-2.1895235	train	-2.334564208984375	-2.1650983753769886	Np	Tl	5.785737	6.1924980000000005	8.312121000000001	90.0	90.0	90.0	orthorhombic	orthorhombic	3	3
1208	NpTlO3	682079	Tl	Np	-2.341299625	OrthoPerovskite_GdFeO3	-2.3532872000000005	train	-2.359970092773437	-2.337908834360644	Tl	Np	5.912866	6.158843	8.598922	90.0	90.0	90.0	orthorhombic	orthorhombic	1	2
1209	NpVO3	681392	Np	V	-3.1638804830000002	OrthoPerovskite_GdFeO3	-3.0513926	train	-3.1166498661041264	-3.074579504313556	Np	V	5.461530000000001	5.707144	7.780875	90.0	90.0	90.0	orthorhombic	orthorhombic	0	0
1210	NpVO3	681393	V	Np	-2.9173559960000004	OrthoPerovskite_GdFeO3	-2.9524197999999995	train	-2.76181960105896	-2.970139173551015			5.547784	5.831373	8.321216999999999	90.0	90.0	90.0	orthorhombic	other	3	2
1211	OsPbO3	682202	Pb	Os	-1.088008143	OrthoPerovskite_GdFeO3	-1.1594338	train	-1.0229086875915527	-1.078103675994066	Pb	Os	5.602312	5.6585980000000005	7.9096660000000005	90.0	90.0	90.0	orthorhombic	orthorhombic	0	2
1212	OsPdO3	693386	Pd	Os	-0.676240643	OrthoPerovskite_GdFeO3	-0.75390875	train	-0.8014867305755615	-0.6501763024682511			5.250644	5.575678	7.424995	90.0	90.0	90.0	orthorhombic	other	0	0
1213	PaAgO3	681442	Pa	Ag	-2.063003784	OrthoPerovskite_GdFeO3	-2.0815864	test	-1.9953863620758057	-2.051198531929603	Pa	Ag	5.834903	6.2351	7.515897	90.0	90.0	90.0	orthorhombic	orthorhombic	3	3
1214	PaAgO3	681443	Ag	Pa	-2.319646711	OrthoPerovskite_GdFeO3	-2.3669127999999997	test	-2.0150282382965092	-2.3522871501285922			5.883394	6.0592239999999995	8.489157	90.0	90.0	90.0	orthorhombic	other	1	0
1215	PaAlO3	693244	Pa	Al	-2.8364554060000002	OrthoPerovskite_GdFeO3	-2.8268807000000002	train	-2.7990922927856445	-2.8376649470197703	Pa	Al	3.7753735	3.80809226	3.80809226	89.94061319	90.0	90.0	tetragonal	tetragonal	0	1
1216	PaAuO3	682376	Pa	Au	-2.067536875	OrthoPerovskite_GdFeO3	-2.0964537	test	-1.974360942840576	-2.0668871426342204			6.417218	6.962867	7.271122	90.0	90.0	90.0	orthorhombic	other	2	2
1217	PaAuO3	682377	Au	Pa	-2.093047705	OrthoPerovskite_GdFeO3	-2.1829865	test	-2.249220848083496	-2.1582002534465725			5.844469999999999	6.14364	8.547884	90.0	90.0	90.0	orthorhombic	other	1	1
1218	PaBeO3	693531	Pa	Be	-2.80591792	OrthoPerovskite_GdFeO3	-2.8985252	train	-2.792799949645996	-2.9132672870295186	Pa	Be	5.084837	5.167602	7.296674	90.0	90.0	90.0	orthorhombic	orthorhombic	0	0
1219	PaBiO3	693220	Bi	Pa	-2.140912842	OrthoPerovskite_GdFeO3	-2.1972713	train	-2.516291379928589	-2.17327418524275			6.193569999999999	6.217980000000001	8.697763	90.0	90.0	90.0	tetragonal	other	1	1
1220	PaCdO3	682362	Pa	Cd	-2.294756187	OrthoPerovskite_GdFeO3	-2.2852770000000002	train	-2.232085943222046	-2.266141563118176	Pa	Cd	5.68371	6.127093	8.177914	90.0	90.0	90.0	orthorhombic	orthorhombic	1	4
1221	PaCdO3	682363	Cd	Pa	-2.29110261	OrthoPerovskite_GdFeO3	-2.3595287999999996	train	-2.37002182006836	-2.344495237579381			5.8841339999999995	6.132045	8.504710000000001	90.0	90.0	90.0	orthorhombic	other	2	1
1222	PaCuO3	681408	Pa	Cu	-2.293710605	OrthoPerovskite_GdFeO3	-2.3290884	test	-2.563059568405152	-2.312373225829243	Pa	Cu	5.311433999999999	5.980336	7.435167	90.0	90.0	90.0	orthorhombic	orthorhombic	2	2
1223	PaCuO3	681409	Cu	Pa	-2.414851774	OrthoPerovskite_GdFeO3	-2.4585493	test	-2.573200225830078	-2.448985903421634			5.559158999999999	6.022485	8.394592999999999	90.0	90.0	90.0	orthorhombic	other	1	0
1224	PaGaO3	681534	Ga	Pa	-2.4348087169999997	OrthoPerovskite_GdFeO3	-2.4498186	train	-2.390157699584961	-2.4397728954458215			6.023554	6.06997	8.592143	90.0	90.0	90.0	orthorhombic	other	0	1
1225	PaHgO3	681990	Pa	Hg	-1.914586259	OrthoPerovskite_GdFeO3	-1.9595313	train	-2.016418218612671	-1.9224007711786193			5.699262999999999	6.203614	8.868029	90.0	90.0	90.0	orthorhombic	other	3	3
1226	PaHgO3	681991	Hg	Pa	-2.170346836	OrthoPerovskite_GdFeO3	-2.2328677000000003	train	-2.191590547561645	-2.210837028669992			6.020745	6.173307	8.622107000000002	90.0	90.0	90.0	orthorhombic	other	2	2
1227	PaInO3	682067	In	Pa	-2.475478059	OrthoPerovskite_GdFeO3	-2.5184271000000003	train	-2.459710597991944	-2.512171518432357	In	Pa	6.185395	6.2013370000000005	8.786013	90.0	90.0	90.0	tetragonal	tetragonal	2	1
1228	PaMnO3	693521	Mn	Pa	-2.659575851	OrthoPerovskite_GdFeO3	-2.6916127	train	-2.661585807800293	-2.694924369188413			5.754144999999999	5.823071	8.490596	90.0	90.0	90.0	orthorhombic	other	1	0
1229	PaPbO3	681388	Pb	Pa	-2.409754275	OrthoPerovskite_GdFeO3	-2.4129652999999998	train	-2.442649602890014	-2.4008837173919404	Pb	Pa	6.053837000000001	6.297022	8.735984	90.0	90.0	90.0	orthorhombic	orthorhombic	0	0
1230	PaPbO3	681389	Pa	Pb	-2.223955618	OrthoPerovskite_GdFeO3	-2.261739	train	-2.3807613849639893	-2.2413032590034216			5.805794000000001	6.046208	9.890601	90.0	90.0	90.0	orthorhombic	other	2	2
1231	PaPdO3	693063	Pd	Pa	-2.064455993	OrthoPerovskite_GdFeO3	-2.1237967	train	-2.0572047233581543	-2.095740645455603			5.359739	6.105358	8.456725	90.0	90.0	90.0	orthorhombic	other	1	1
1232	PaSbO3	693515	Sb	Pa	-2.143460279	OrthoPerovskite_GdFeO3	-2.1937428	test	-2.3616554737091064	-2.1695507611596114			6.350308999999999	6.357961	8.062425	90.0	90.0	90.0	tetragonal	other	0	0
1233	PaSnO3	693086	Sn	Pa	-2.384002077	OrthoPerovskite_GdFeO3	-2.3780495999999998	train	-2.3053667545318604	-2.3640391777122947			5.929492	6.329368	8.620978	90.0	90.0	90.0	orthorhombic	other	0	0
1234	PaTeO3	693318	Te	Pa	-2.030431477	OrthoPerovskite_GdFeO3	-2.177109	train	-2.105919361114502	-2.1519980641172127			5.794852	6.0754150000000005	9.946463	90.0	90.0	90.0	orthorhombic	other	0	0
1235	PaTiO3	693332	Pa	Ti	-2.831643227	OrthoPerovskite_GdFeO3	-2.7090912	train	-3.0608921051025386	-2.7133684297912564	Pa	Ti	5.419062	6.010347	7.554556	90.0	90.0	90.0	orthorhombic	orthorhombic	0	1
1236	PaTlO3	681573	Tl	Pa	-2.557284734	OrthoPerovskite_GdFeO3	-2.6259346000000003	train	-2.5132277011871342	-2.6256180295895013	Tl	Pa	4.4006455	6.196479	6.23369	90.0	90.0	90.0	orthorhombic	orthorhombic	2	0
1237	PaTlO3	681574	Pa	Tl	-1.9382807690000001	OrthoPerovskite_GdFeO3	-1.9485292	train	-1.9456862211227417	-1.91079088479486			5.9906440000000005	6.276236	8.464497999999999	90.0	90.0	90.0	orthorhombic	other	3	3
1238	Pb2O3	681462	Pb	Pb	-1.180041005	OrthoPerovskite_GdFeO3	-1.2040879999999998	train	-1.0281156301498413	-1.1252246973043314	Pb	Pb	5.885235	6.086241	8.453919	90.0	90.0	90.0	orthorhombic	orthorhombic	0	1
1239	PbAuO3	693070	Pb	Au	-0.605535022	OrthoPerovskite_GdFeO3	-0.802004	train	-0.6514409780502319	-0.7009284668821817	Pb	Au	5.683305000000001	5.92836	8.093507	90.0	90.0	90.0	orthorhombic	orthorhombic	0	0
1240	PdPbO3	681519	Pb	Pd	-0.900725102	OrthoPerovskite_GdFeO3	-0.96536833	train	-0.8232494592666626	-0.8733174935642684	Pb	Pd	5.524829	5.783076	7.856615	90.0	90.0	90.0	orthorhombic	orthorhombic	0	1
1241	PdPbO3	681520	Pd	Pb	-0.655894819	OrthoPerovskite_GdFeO3	-0.72868645	train	-0.6791708469390869	-0.6235606529706919			5.382266	5.751602	8.415265	90.0	90.0	90.0	orthorhombic	other	4	4
1242	PmAgO3	693234	Pm	Ag	-1.9200907719999998	OrthoPerovskite_GdFeO3	-1.9465191000000002	train	-1.913971781730652	-1.9086697413204328	Pm	Ag	5.54742	6.017098000000001	7.894514	90.0	90.0	90.0	orthorhombic	orthorhombic	0	0
1243	PmAlO3	682920	Al	Pm	-3.25648881	OrthoPerovskite_GdFeO3	-3.1634738	train	-3.2769126892089844	-3.1928523792879173			5.468595	5.483558	8.587368	90.0	90.0	90.0	tetragonal	other	3	4
1244	PmBeO3	682544	Be	Pm	-2.836265552	OrthoPerovskite_GdFeO3	-2.8324149	train	-2.614755392074585	-2.843504871509186			4.750248	5.661981	8.144210000000001	90.0	90.0	90.0	orthorhombic	other	0	0
1245	PmBeO3	682545	Pm	Be	-2.7237149310000004	OrthoPerovskite_GdFeO3	-2.7315812000000004	train	-2.766685009002685	-2.7371008394922	Pm	Be	3.6025264999999997	3.60690763	3.606907	90.52846394	90.0	90.0	cubic	cubic	3	2
1246	PmCoO3	682618	Co	Pm	-2.286609384	OrthoPerovskite_GdFeO3	-2.2849437999999997	train	-2.210977554321289	-2.2657899562301203			5.52595	5.6506099999999995	8.549374	90.0	90.0	90.0	orthorhombic	other	5	5
1247	PmCoO3	682619	Pm	Co	-2.478804527	OrthoPerovskite_GdFeO3	-2.3853877	train	-2.397576332092285	-2.371782654618764	Pm	Co	5.312525	5.538424	7.629072	90.0	90.0	90.0	orthorhombic	orthorhombic	0	2
1248	PmCrO3	681589	Cr	Pm	-2.767519942	OrthoPerovskite_GdFeO3	-2.796079	train	-2.744051933288574	-2.8051616760599862			5.638971	5.698363	8.293925999999999	90.0	90.0	90.0	orthorhombic	other	5	5
1249	PmCrO3	681590	Pm	Cr	-3.142656945	OrthoPerovskite_GdFeO3	-3.099742	train	-2.9743237495422363	-3.1255998586752636	Pm	Cr	5.385934	5.5944080000000005	7.716423	90.0	90.0	90.0	orthorhombic	orthorhombic	0	1
1250	PmCuO3	682314	Cu	Pm	-1.91997034	OrthoPerovskite_GdFeO3	-1.9841490000000002	train	-1.9456921815872192	-1.9483784209027153			5.642665	5.677688	8.183781	90.0	90.0	90.0	orthorhombic	other	5	5
1251	PmCuO3	682315	Pm	Cu	-2.204347573	OrthoPerovskite_GdFeO3	-2.2119823	train	-2.1963369846343994	-2.1887978615037804	Pm	Cu	5.308471	5.566237999999999	7.549760000000001	90.0	90.0	90.0	orthorhombic	orthorhombic	0	1
1252	PmEuO3	693431	Eu	Pm	-3.05729999	OrthoPerovskite_GdFeO3	-3.0919528	train	-3.086000919342041	-3.1173803617591855			5.960503	6.168992	8.512578999999999	90.0	90.0	90.0	orthorhombic	other	0	0
1253	PmFeO3	682226	Fe	Pm	-2.531772507	OrthoPerovskite_GdFeO3	-2.4413462000000004	train	-2.4540600776672363	-2.430832456675245			5.614447	5.619553	8.539359	90.0	90.0	90.0	tetragonal	other	3	5
1254	PmFeO3	682227	Pm	Fe	-2.726659115	OrthoPerovskite_GdFeO3	-2.6757598	train	-2.672322988510132	-2.6781957112182893	Pm	Fe	5.404635	5.639049	7.7353570000000005	90.0	90.0	90.0	orthorhombic	orthorhombic	0	1
1255	PmGaO3	682274	Ga	Pm	-2.728821547	OrthoPerovskite_GdFeO3	-2.6491416	train	-2.710668563842773	-2.6501070483502747			5.571887	5.618118	8.57045	90.0	90.0	90.0	orthorhombic	other	4	4
1256	PmGeO3	693180	Pm	Ge	-2.525665773	OrthoPerovskite_GdFeO3	-2.5920617999999997	train	-2.554755210876465	-2.589874002585583	Pm	Ge	5.465887	5.823015	7.894428	90.0	90.0	90.0	orthorhombic	orthorhombic	0	0
1257	PmHfO3	682641	Hf	Pm	-3.2453689310000002	OrthoPerovskite_GdFeO3	-3.2469444	train	-3.3170690536499023	-3.280934125716711			6.000051	6.077635	7.593209	90.0	90.0	90.0	orthorhombic	other	4	3
1258	PmHfO3	682642	Pm	Hf	-3.4024479889999997	OrthoPerovskite_GdFeO3	-3.3702303999999996	train	-3.4007081985473637	-3.4110307847825405	Pm	Hf	5.574314	6.070775	7.750139999999999	90.0	90.0	90.0	orthorhombic	orthorhombic	0	1
1259	PmInO3	693458	Pm	In	-2.7372046460000004	OrthoPerovskite_GdFeO3	-2.7287138	test	-2.5802202224731445	-2.7340750363985364	Pm	In	5.610168	5.927536	8.151368	90.0	90.0	90.0	orthorhombic	orthorhombic	0	0
1260	PmMgO3	682436	Mg	Pm	-2.790740855	OrthoPerovskite_GdFeO3	-2.7921612000000002	test	-2.697700023651123	-2.801027445969886			5.610126	5.816654	8.391894	90.0	90.0	90.0	orthorhombic	other	2	2
1261	PmMgO3	682437	Pm	Mg	-2.875037485	OrthoPerovskite_GdFeO3	-2.838492	test	-2.843858480453491	-2.849917687293695	Pm	Mg	5.362846	5.755632	7.700933	90.0	90.0	90.0	orthorhombic	orthorhombic	0	1
1262	PmMnO3	681390	Mn	Pm	-2.604489706	OrthoPerovskite_GdFeO3	-2.5611289	train	-2.620704174041748	-2.55723228377552			5.687511	5.7240910000000005	8.248145	90.0	90.0	90.0	orthorhombic	other	4	4
1263	PmMnO3	681391	Pm	Mn	-2.905131905	OrthoPerovskite_GdFeO3	-2.8184595	train	-2.829910516738892	-2.8287785366785703	Pm	Mn	5.39783	5.740368	7.638585000000001	90.0	90.0	90.0	orthorhombic	orthorhombic	0	0
1264	PmMoO3	693256	Pm	Mo	-2.6310312319999998	OrthoPerovskite_GdFeO3	-2.6747982999999995	train	-2.611567974090576	-2.6771810953033284	Pm	Mo	5.488523000000001	5.89303	7.906666	90.0	90.0	90.0	orthorhombic	orthorhombic	0	0
1265	PmNbO3	693144	Pm	Nb	-2.9456293139999996	OrthoPerovskite_GdFeO3	-2.963735	train	-2.893175840377808	-2.982079456443328	Pm	Nb	5.488537	6.009648	7.796525999999999	90.0	90.0	90.0	orthorhombic	orthorhombic	0	0
1266	PmNiO3	682408	Ni	Pm	-2.03726859	OrthoPerovskite_GdFeO3	-2.0799157999999998	train	-1.8876882791519165	-2.0494356433726266			5.716846	5.792816999999999	7.964244	90.0	90.0	90.0	orthorhombic	other	3	3
1267	PmNiO3	682409	Pm	Ni	-2.34848683	OrthoPerovskite_GdFeO3	-2.3121204	train	-2.3189196586608887	-2.294467866656028	Pm	Ni	5.306847	5.475943	7.570158	90.0	90.0	90.0	orthorhombic	orthorhombic	0	1
1268	PmPdO3	682346	Pd	Pm	-1.829310363	OrthoPerovskite_GdFeO3	-1.9446259	train	-1.7600448131561282	-1.9066719557247978			5.695357	5.937273	8.129667	90.0	90.0	90.0	orthorhombic	other	4	3
1269	PmPdO3	682347	Pm	Pd	-2.15990701	OrthoPerovskite_GdFeO3	-2.1804368	train	-2.1273422241210938	-2.1555097009781643	Pm	Pd	5.486301999999999	5.934326	7.671702000000001	90.0	90.0	90.0	orthorhombic	orthorhombic	0	0
1270	PmPtO3	693542	Pm	Pt	-2.09351381	OrthoPerovskite_GdFeO3	-2.1175396	train	-2.1264264583587646	-2.0891378859740657	Pm	Pt	5.529508	6.102024	7.5128330000000005	90.0	90.0	90.0	orthorhombic	orthorhombic	0	0
1271	PmRhO3	682728	Rh	Pm	-1.9788217190000001	OrthoPerovskite_GdFeO3	-2.009918	train	-1.7829484939575195	-1.9755709716178602			5.4423129999999995	5.852904	8.406285	90.0	90.0	90.0	orthorhombic	other	3	3
1272	PmRhO3	682729	Pm	Rh	-2.360952099	OrthoPerovskite_GdFeO3	-2.3493216	train	-2.207789421081543	-2.3337241636665547	Pm	Rh	5.357001	5.8260559999999995	7.751157000000001	90.0	90.0	90.0	orthorhombic	orthorhombic	0	0
1273	PmRuO3	693213	Pm	Ru	-2.3629263590000003	OrthoPerovskite_GdFeO3	-2.3775303	train	-2.2388172149658203	-2.3634911901463678	Pm	Ru	5.314534	5.8773290000000005	7.732100999999999	90.0	90.0	90.0	orthorhombic	orthorhombic	0	0
1274	PmScO3	693049	Pm	Sc	-3.754176057	OrthoPerovskite_GdFeO3	-3.6169682	train	-3.666345596313477	-3.6713990621640193	Pm	Sc	5.531281	5.788355999999999	7.9729600000000005	90.0	90.0	90.0	orthorhombic	orthorhombic	0	0
1275	PmTaO3	693133	Pm	Ta	-2.9475208339999996	OrthoPerovskite_GdFeO3	-2.9208589	train	-2.9592714309692383	-2.9368347622868756	Pm	Ta	5.469048	6.005721	7.738353	90.0	90.0	90.0	orthorhombic	orthorhombic	0	2
1276	PmTcO3	693245	Pm	Tc	-2.490094257	OrthoPerovskite_GdFeO3	-2.516616	train	-2.40726089477539	-2.510260368267422	Pm	Tc	5.3566199999999995	5.910799	7.748792	90.0	90.0	90.0	orthorhombic	orthorhombic	0	0
1277	PmTiO3	681479	Ti	Pm	-3.1450158139999997	OrthoPerovskite_GdFeO3	-3.0237632000000003	test	-3.1969141960144043	-3.0454237799653465			5.6962589999999995	5.763825	8.20802	90.0	90.0	90.0	orthorhombic	other	4	5
1278	PmTiO3	681480	Pm	Ti	-3.414417453	OrthoPerovskite_GdFeO3	-3.5298385999999997	test	-3.388967752456665	-3.5794561824717412	Pm	Ti	5.422274	5.699279	7.763578999999999	90.0	90.0	90.0	orthorhombic	orthorhombic	0	0
1279	PmVO3	681402	V	Pm	-2.9412517289999998	OrthoPerovskite_GdFeO3	-2.9452372	train	-2.83540940284729	-2.962559786893924			5.6701690000000005	5.767318	8.324079	90.0	90.0	90.0	orthorhombic	other	4	2
1280	PmVO3	681403	Pm	V	-3.216042931	OrthoPerovskite_GdFeO3	-3.043675	train	-3.056024074554444	-3.0664355627791853	Pm	V	5.417872	5.702079	7.749189	90.0	90.0	90.0	orthorhombic	orthorhombic	0	0
1281	PmWO3	693510	Pm	W	-2.500047046	OrthoPerovskite_GdFeO3	-2.5200098	train	-2.574446678161621	-2.513841651150617	Pm	W	5.321251999999999	6.013711	7.74078	90.0	90.0	90.0	orthorhombic	orthorhombic	0	1
1282	PmZnO3	681878	Zn	Pm	-2.261965797	OrthoPerovskite_GdFeO3	-2.350004	test	-2.2186431884765625	-2.3344442613268446			5.494367	5.734077	8.386289	90.0	90.0	90.0	orthorhombic	other	3	1
1283	PmZnO3	681879	Pm	Zn	-2.395117724	OrthoPerovskite_GdFeO3	-2.4042060000000003	test	-2.369378566741944	-2.3916405294731558	Pm	Zn	5.364349	5.746366	7.660117999999999	90.0	90.0	90.0	orthorhombic	orthorhombic	0	0
1284	PmZrO3	693211	Pm	Zr	-3.347839819	OrthoPerovskite_GdFeO3	-3.2743165000000003	train	-3.3691523075103764	-3.309818336102447	Pm	Zr	5.618053	6.138141	7.776928999999999	90.0	90.0	90.0	orthorhombic	orthorhombic	0	2
1285	PrAgO3	681561	Pr	Ag	-1.891882866	OrthoPerovskite_GdFeO3	-2.0061247	train	-1.9452470541000368	-1.971568119251538	Pr	Ag	5.59849	6.009809	8.009386	90.0	90.0	90.0	orthorhombic	orthorhombic	0	0
1286	PrAgO3	681562	Ag	Pr	-1.6244881740000001	OrthoPerovskite_GdFeO3	-1.6903618999999999	train	-1.7077414989471436	-1.6383617102734558			5.913613	6.087686	8.241337	90.0	90.0	90.0	orthorhombic	other	3	2
1287	PrAlO3	682164	Pr	Al	-3.4982165089999997	OrthoPerovskite_GdFeO3	-3.501503	train	-3.4850058555603027	-3.5495552456855233	Pr	Al	5.322088	5.334081140000001	5.33408114	60.38660998	60.07434857999999	60.07434858000001	rhombohedral	rhombohedral	1	0
1288	PrAlO3	682165	Al	Pr	-3.21341775	OrthoPerovskite_GdFeO3	-3.168101	train	-3.3274803161621094	-3.197735198592862			5.5288949999999994	5.537164	8.719564	90.0	90.0	90.0	tetragonal	other	4	5
1289	PrAsO3	693313	Pr	As	-2.344844396	OrthoPerovskite_GdFeO3	-2.326763	train	-2.388960838317871	-2.3099193643121883	Pr	As	5.59549	5.972512	8.070179	90.0	90.0	90.0	orthorhombic	orthorhombic	0	0
1290	PrAuO3	693326	Pr	Au	-1.933813835	OrthoPerovskite_GdFeO3	-2.0303578	train	-1.9462956190109253	-1.9971399226096498	Pr	Au	5.712725	6.561488000000001	7.416529	90.0	90.0	90.0	orthorhombic	orthorhombic	0	0
1291	PrBeO3	682796	Pr	Be	-2.69454998	OrthoPerovskite_GdFeO3	-2.7244627	train	-2.8691954612731934	-2.7295890938961054	Pr	Be	3.64655875	3.64655907	3.647279	90.0	90.0	90.479076	cubic	cubic	4	3
1292	PrBeO3	682797	Be	Pr	-2.8028838080000003	OrthoPerovskite_GdFeO3	-2.864882	train	-2.6956229209899902	-2.877765543763588			4.794729	5.754005	8.186867	90.0	90.0	90.0	orthorhombic	other	0	0
1293	PrCdO3	693483	Pr	Cd	-2.165613676	OrthoPerovskite_GdFeO3	-2.1406322	train	-2.230602264404297	-2.11350618496295	Pr	Cd	5.67776	6.104394	8.166291000000001	90.0	90.0	90.0	orthorhombic	orthorhombic	0	0
1294	PrCoO3	682382	Pr	Co	-2.415406403	OrthoPerovskite_GdFeO3	-2.3637078	train	-2.456618309020996	-2.3489050970787244	Pr	Co	5.390045	5.477414	7.70055	90.0	90.0	90.0	orthorhombic	orthorhombic	0	2
1295	PrCoO3	682383	Co	Pr	-2.0653996709999998	OrthoPerovskite_GdFeO3	-2.1881404	train	-2.5277628898620605	-2.1636388691138775			5.543691	6.3358300000000005	8.837825	90.0	90.0	90.0	orthorhombic	other	5	5
1296	PrCrO3	682156	Pr	Cr	-3.104009137	OrthoPerovskite_GdFeO3	-3.1357353	train	-2.9775550365448	-3.163581527954453	Pr	Cr	5.462296	5.596359	7.782315	90.0	90.0	90.0	orthorhombic	orthorhombic	0	0
1297	PrCrO3	682157	Cr	Pr	-2.7120050819999997	OrthoPerovskite_GdFeO3	-2.6444520000000002	train	-2.772000312805176	-2.645158381897027			5.732548	5.746097	8.399546	90.0	90.0	90.0	tetragonal	other	5	5
1298	PrCuO3	682631	Pr	Cu	-2.171709195	OrthoPerovskite_GdFeO3	-2.2637793999999998	test	-2.2053358554840092	-2.243456376333515	Pr	Cu	5.414127	5.434133	7.6610320000000005	90.0	90.0	90.0	tetragonal	tetragonal	0	0
1299	PrCuO3	682632	Cu	Pr	-1.877561653	OrthoPerovskite_GdFeO3	-1.9383426	test	-2.0170211791992188	-1.9000415488829154			5.668334	5.795719	8.30238	90.0	90.0	90.0	orthorhombic	other	5	5
1300	PrErO3	693559	Pr	Er	-3.703758684	OrthoPerovskite_GdFeO3	-3.4553733	test	-3.6335761547088623	-3.5008772136810054	Pr	Er	5.780698	6.03949	8.376949	90.0	90.0	90.0	orthorhombic	orthorhombic	0	1
1301	PrFeO3	682008	Pr	Fe	-2.6902008360000003	OrthoPerovskite_GdFeO3	-2.7208145	test	-2.744590759277344	-2.725739357254443	Pr	Fe	5.476543	5.6414919999999995	7.810929	90.0	90.0	90.0	orthorhombic	orthorhombic	0	0
1302	PrFeO3	682009	Fe	Pr	-2.48654665	OrthoPerovskite_GdFeO3	-2.470616	test	-2.5426714420318604	-2.461719201249041			5.669487	5.683712	8.680736	90.0	90.0	90.0	tetragonal	other	4	4
1303	PrGaO3	681396	Pr	Ga	-2.874849592	OrthoPerovskite_GdFeO3	-2.9056275	train	-2.969747304916382	-2.920761937692881	Pr	Ga	5.4680089999999995	5.548234	7.77118	90.0	90.0	90.0	orthorhombic	orthorhombic	0	1
1304	PrGaO3	681397	Ga	Pr	-2.681028163	OrthoPerovskite_GdFeO3	-2.7363865	train	-2.840466022491455	-2.7421715975329266			5.628017	5.684812	8.678058	90.0	90.0	90.0	orthorhombic	other	5	5
1305	PrHfO3	682929	Hf	Pr	-3.210256353	OrthoPerovskite_GdFeO3	-3.2166650000000003	train	-3.293257236480713	-3.248982008051138			6.0387949999999995	6.196530999999999	7.604338	90.0	90.0	90.0	orthorhombic	other	3	2
1306	PrInO3	693166	Pr	In	-2.705158635	OrthoPerovskite_GdFeO3	-2.6887531000000005	train	-2.6986162662506104	-2.6919067969882886	Pr	In	5.670317	5.968139	8.212355	90.0	90.0	90.0	orthorhombic	orthorhombic	0	0
1307	PrIrO3	693504	Pr	Ir	-2.1806599859999998	OrthoPerovskite_GdFeO3	-2.2502303	train	-2.0504817962646484	-2.2291587866368037	Pr	Ir	5.40195	5.928293	7.846009	90.0	90.0	90.0	orthorhombic	orthorhombic	0	0
1308	PrLuO3	693321	Pr	Lu	-3.755369291	OrthoPerovskite_GdFeO3	-3.5012999	test	-3.675321102142334	-3.5493409258807094	Pr	Lu	5.728813	5.966475	8.291867	90.0	90.0	90.0	orthorhombic	orthorhombic	0	2
1309	PrMgO3	681450	Pr	Mg	-2.8434803210000004	OrthoPerovskite_GdFeO3	-2.8417804	train	-2.8750908374786377	-2.853387747589853	Pr	Mg	5.412033	5.781984	7.791792999999999	90.0	90.0	90.0	orthorhombic	orthorhombic	0	1
1310	PrMgO3	681451	Mg	Pr	-2.7387332260000004	OrthoPerovskite_GdFeO3	-2.758542	train	-2.7626914978027344	-2.765551028530225			5.647428	5.893425	8.500096000000001	90.0	90.0	90.0	orthorhombic	other	2	2
1311	PrMnO3	681412	Pr	Mn	-2.868166427	OrthoPerovskite_GdFeO3	-2.7455830000000003	test	-2.882493495941162	-2.7518761375869385	Pr	Mn	5.467677	5.685201	7.770133	90.0	90.0	90.0	orthorhombic	orthorhombic	0	2
1312	PrMnO3	681413	Mn	Pr	-2.5548129	OrthoPerovskite_GdFeO3	-2.569429	test	-2.673076629638672	-2.56599090421833			5.744225	5.778864	8.396092	90.0	90.0	90.0	orthorhombic	other	4	4
1313	PrMoO3	693071	Pr	Mo	-2.596223563	OrthoPerovskite_GdFeO3	-2.6548502	train	-2.5712568759918213	-2.6561310071772555	Pr	Mo	5.530938	5.927564	7.974188000000001	90.0	90.0	90.0	orthorhombic	orthorhombic	0	0
1314	PrNbO3	693149	Pr	Nb	-2.91315835	OrthoPerovskite_GdFeO3	-2.832289	train	-2.880678415298462	-2.8433720164455423	Pr	Nb	5.541671	6.032414	7.898594999999999	90.0	90.0	90.0	orthorhombic	orthorhombic	0	1
1315	PrNiO3	682105	Ni	Pr	-2.037067834	OrthoPerovskite_GdFeO3	-2.1430688	train	-2.0910983085632324	-2.116077389475058			5.568499	5.843498	8.44412	90.0	90.0	90.0	orthorhombic	other	3	3
1316	PrPdO3	682370	Pr	Pd	-2.127275701	OrthoPerovskite_GdFeO3	-2.1638932	train	-2.11922287940979	-2.1380521868328315	Pr	Pd	5.552249	5.950986	7.793591	90.0	90.0	90.0	orthorhombic	orthorhombic	0	1
1317	PrPdO3	682371	Pd	Pr	-1.781164629	OrthoPerovskite_GdFeO3	-1.8290943	train	-1.7649216651916504	-1.7847580711269537			5.784992	6.01588	8.183449000000001	90.0	90.0	90.0	orthorhombic	other	4	4
1318	PrRhO3	682842	Pr	Rh	-2.315519735	OrthoPerovskite_GdFeO3	-2.3510833	train	-2.1992850303649902	-2.3355831848390824	Pr	Rh	5.420694	5.848768	7.838764	90.0	90.0	90.0	orthorhombic	orthorhombic	0	0
1319	PrRhO3	682843	Rh	Pr	-1.925203956	OrthoPerovskite_GdFeO3	-2.0047534	train	-1.819846749305725	-1.9701210648530094			5.5419160000000005	5.910618	8.497551	90.0	90.0	90.0	orthorhombic	other	4	3
1320	PrRuO3	693139	Pr	Ru	-2.319711643	OrthoPerovskite_GdFeO3	-2.3861196	train	-2.263582468032837	-2.3725549867957367	Pr	Ru	5.383685	5.894639	7.8182339999999995	90.0	90.0	90.0	orthorhombic	orthorhombic	0	1
1321	PrScO3	681360	Pr	Sc	-3.721067919	OrthoPerovskite_GdFeO3	-3.5102086000000003	train	-3.693925380706787	-3.5587417670680286	Pr	Sc	5.59622	5.811317	8.039675	90.0	90.0	90.0	orthorhombic	orthorhombic	0	1
1322	PrScO3	681361	Sc	Pr	-3.479400899	OrthoPerovskite_GdFeO3	-3.4017044999999997	train	-3.4136323928833012	-3.4442436009750024			5.806057	5.9214910000000005	8.507739	90.0	90.0	90.0	orthorhombic	other	3	3
1323	PrSiO3	693492	Pr	Si	-2.675891932	OrthoPerovskite_GdFeO3	-2.6708064	test	-3.0807371139526367	-2.6729686717246186	Pr	Si	3.7812879999999995	3.78858644	3.78858644	89.77496037000002	90.0	90.0	cubic	cubic	2	1
1324	PrTiO3	681782	Pr	Ti	-3.3817589669999997	OrthoPerovskite_GdFeO3	-3.5373415999999995	train	-3.34681248664856	-3.5873736689095437	Pr	Ti	5.493053	5.695454	7.839904	90.0	90.0	90.0	orthorhombic	orthorhombic	0	0
1325	PrTiO3	681783	Ti	Pr	-3.097831387	OrthoPerovskite_GdFeO3	-2.9736845	train	-3.2350387573242188	-2.992578594296576			5.738492	5.841158999999999	8.326019	90.0	90.0	90.0	orthorhombic	other	4	5
1326	PrTlO3	682702	Tl	Pr	-2.139559134	OrthoPerovskite_GdFeO3	-2.2038207	train	-2.1477923393249507	-2.1801853921834065			5.997602	6.07011	8.756031	90.0	90.0	90.0	orthorhombic	other	0	0
1327	PrTmO3	693443	Pr	Tm	-3.728887533	OrthoPerovskite_GdFeO3	-3.7106017999999996	train	-3.749001026153565	-3.770205240775591	Pr	Tm	5.762842	6.005367	8.348631	90.0	90.0	90.0	orthorhombic	orthorhombic	0	0
1328	PrVO3	681802	Pr	V	-3.180002435	OrthoPerovskite_GdFeO3	-2.8268385	test	-3.0834555625915527	-2.8376204157752447	Pr	V	5.482444999999999	5.720868	7.814052	90.0	90.0	90.0	orthorhombic	orthorhombic	0	2
1329	PrVO3	681803	V	Pr	-2.8883286630000002	OrthoPerovskite_GdFeO3	-2.661102	test	-2.883383512496948	-2.6627281738721584			5.7234300000000005	5.818573000000001	8.478622	90.0	90.0	90.0	orthorhombic	other	4	5
1330	PrZnO3	682080	Pr	Zn	-2.36094336	OrthoPerovskite_GdFeO3	-2.4638603	test	-2.437806367874145	-2.4545902977267344	Pr	Zn	5.436701	5.723632	7.765559	90.0	90.0	90.0	orthorhombic	orthorhombic	0	0
1331	PrZnO3	682081	Zn	Pr	-2.254754115	OrthoPerovskite_GdFeO3	-2.2647293	test	-2.1429700851440434	-2.244458751432445			5.492684	5.873164	8.743477	90.0	90.0	90.0	orthorhombic	other	4	2
1332	PrZrO3	682840	Pr	Zr	-3.320288521	OrthoPerovskite_GdFeO3	-3.1300630000000003	train	-3.333351850509644	-3.157595874439706	Pr	Zr	5.680979	6.09255	8.03129	90.0	90.0	90.0	orthorhombic	orthorhombic	0	5
1333	PrZrO3	682841	Zr	Pr	-3.140344925	OrthoPerovskite_GdFeO3	-3.1877419999999996	train	-3.2321791648864746	-3.2184612216669493			6.053642	6.147762	7.859242	90.0	90.0	90.0	orthorhombic	other	4	2
1334	PtPbO3	681497	Pb	Pt	-0.8992329590000001	OrthoPerovskite_GdFeO3	-1.0140122999999999	train	-0.8305860757827759	-0.9246486907861623	Pb	Pt	5.5951260000000005	5.806365	7.959063	90.0	90.0	90.0	orthorhombic	orthorhombic	0	0
1335	PtPbO3	681498	Pt	Pb	-0.606239454	OrthoPerovskite_GdFeO3	-0.79124135	train	-0.6750890016555786	-0.6895712583776081			5.954148	6.075687	7.848274000000001	90.0	90.0	90.0	orthorhombic	other	5	3
1336	PuAgO3	693136	Ag	Pu	-2.016278142	OrthoPerovskite_GdFeO3	-1.9832981	train	-2.0981128215789795	-1.9474805148371512	Ag	Pu	5.6700349999999995	5.989527	8.342678	90.0	90.0	90.0	orthorhombic	orthorhombic	0	2
1337	PuAlO3	682966	Al	Pu	-3.30613164	OrthoPerovskite_GdFeO3	-3.1266127	test	-3.4505105018615723	-3.1539549703404988			5.4117809999999995	5.434896	9.085747	90.0	90.0	90.0	tetragonal	other	3	4
1338	PuAlO3	682967	Pu	Al	-3.52181998	OrthoPerovskite_GdFeO3	-3.5387166	test	-3.4047532081604004	-3.588824627706289	Pu	Al	5.306941999999999	5.329123	7.493405999999999	90.0	90.0	90.0	tetragonal	tetragonal	0	0
1339	PuBeO3	693081	Pu	Be	-2.94138932	OrthoPerovskite_GdFeO3	-2.9678016	train	-2.915459156036377	-2.986370706656306	Pu	Be	5.047319	5.067908	7.207382000000001	90.0	90.0	90.0	tetragonal	tetragonal	0	1
1340	PuCdO3	693485	Cd	Pu	-2.4949912430000003	OrthoPerovskite_GdFeO3	-2.5108984	train	-2.4808173179626465	-2.5042269122555894			5.725726	5.903413	8.408483	90.0	90.0	90.0	orthorhombic	other	0	1
1341	PuCrO3	682962	Cr	Pu	-2.791533498	OrthoPerovskite_GdFeO3	-2.7609694	train	-2.908623695373535	-2.76811252480893			5.7213709999999995	5.7520690000000005	8.232999999999999	90.0	90.0	90.0	orthorhombic	other	3	3
1342	PuCrO3	682963	Pu	Cr	-3.1200849980000003	OrthoPerovskite_GdFeO3	-3.1032542999999997	train	-3.057227611541748	-3.129306187825669	Pu	Cr	5.463166	5.5285470000000005	7.735416000000001	90.0	90.0	90.0	orthorhombic	orthorhombic	0	1
1343	PuFeO3	682956	Fe	Pu	-2.577194985	OrthoPerovskite_GdFeO3	-2.5634997000000004	train	-2.731806755065918	-2.5597340533139374			5.677046	6.0618620000000005	8.320913000000001	90.0	90.0	90.0	orthorhombic	other	2	3
1344	PuFeO3	682957	Pu	Fe	-2.7035749510000002	OrthoPerovskite_GdFeO3	-2.776708	train	-2.843756675720215	-2.784720568531441	Pu	Fe	5.480757	5.639173	7.744845	90.0	90.0	90.0	orthorhombic	orthorhombic	0	0
1345	PuGaO3	681986	Ga	Pu	-2.7992351889999996	OrthoPerovskite_GdFeO3	-2.7859564	test	-2.9276890754699707	-2.7944798756847624			5.36255	6.068851	9.280014	90.0	90.0	90.0	orthorhombic	other	1	1
1346	PuGaO3	681987	Pu	Ga	-2.895145253	OrthoPerovskite_GdFeO3	-2.896224	test	-2.946494579315185	-2.9108389623872863	Pu	Ga	5.473489	5.522587000000001	7.720938	90.0	90.0	90.0	orthorhombic	orthorhombic	0	0
1347	PuGeO3	693305	Pu	Ge	-2.512714143	OrthoPerovskite_GdFeO3	-2.5267906000000004	train	-2.6733598709106445	-2.5209970412662317	Pu	Ge	5.557128	5.795071	7.909866	90.0	90.0	90.0	orthorhombic	orthorhombic	0	0
1348	PuHfO3	681456	Hf	Pu	-3.2791936710000003	OrthoPerovskite_GdFeO3	-3.2201784	train	-3.2135119438171387	-3.2526894979685808			6.101817	6.244675	7.252895	90.0	90.0	90.0	orthorhombic	other	4	3
1349	PuHfO3	681457	Pu	Hf	-3.5770761319999997	OrthoPerovskite_GdFeO3	-3.5010517	train	-3.2996726036071777	-3.5490790146273623	Pu	Hf	5.720515	5.788883	8.161389999999999	90.0	90.0	90.0	orthorhombic	orthorhombic	0	0
1350	PuHgO3	693269	Hg	Pu	-2.1428831059999998	OrthoPerovskite_GdFeO3	-2.2737591	train	-2.126319408416748	-2.253987382518153			5.833319	5.928669	8.5615	90.0	90.0	90.0	orthorhombic	other	1	0
1351	PuMgO3	682659	Mg	Pu	-3.0870839360000004	OrthoPerovskite_GdFeO3	-3.0181080000000002	train	-3.0435674190521236	-3.039456171101817			5.566586	5.616887	8.257757000000002	90.0	90.0	90.0	orthorhombic	other	1	3
1352	PuMgO3	682660	Pu	Mg	-3.1478345310000004	OrthoPerovskite_GdFeO3	-3.1244311000000002	train	-3.188549041748047	-3.1516528527325143	Pu	Mg	5.332218	5.673443	7.628710000000001	90.0	90.0	90.0	orthorhombic	orthorhombic	0	0
1353	PuMnO3	682970	Mn	Pu	-2.8023654189999996	OrthoPerovskite_GdFeO3	-2.6673658	train	-2.804098606109619	-2.669338003480196			5.624861	5.739221	8.302716	90.0	90.0	90.0	orthorhombic	other	2	2
1354	PuMnO3	682971	Pu	Mn	-2.887941661	OrthoPerovskite_GdFeO3	-2.744828	train	-2.905412197113037	-2.7510794293021803	Pu	Mn	5.483321	5.608282	7.732842	90.0	90.0	90.0	orthorhombic	orthorhombic	0	0
1355	PuMoO3	681865	Pu	Mo	-2.607434857	OrthoPerovskite_GdFeO3	-2.6642473	train	-2.6866111755371094	-2.666047228929178	Pu	Mo	5.442574	5.879002	7.816994	90.0	90.0	90.0	orthorhombic	orthorhombic	0	0
1356	PuNbO3	681734	Nb	Pu	-2.728102856	OrthoPerovskite_GdFeO3	-2.768252	train	-2.736124038696289	-2.775797435742149			5.637707	6.267665	7.807549000000001	90.0	90.0	90.0	orthorhombic	other	1	2
1357	PuNiO3	682814	Ni	Pu	-2.378236431	OrthoPerovskite_GdFeO3	-2.353532	train	-2.4558115005493164	-2.338167157788602			5.517958999999999	5.5805620000000005	8.266696000000001	90.0	90.0	90.0	orthorhombic	other	1	2
1358	PuNiO3	682815	Pu	Ni	-2.472855191	OrthoPerovskite_GdFeO3	-2.4689147	train	-2.8034768104553223	-2.4599239167392932	Pu	Ni	5.2479949999999995	5.674251	7.477799	90.0	90.0	90.0	orthorhombic	orthorhombic	0	0
1359	PuPbO3	681660	Pb	Pu	-2.540058928	OrthoPerovskite_GdFeO3	-2.5613716	test	-2.570769786834717	-2.5574883911936803	Pb	Pu	5.977288	6.161493	8.586472	90.0	90.0	90.0	orthorhombic	orthorhombic	0	0
1360	PuPbO3	681661	Pu	Pb	-2.324111315	OrthoPerovskite_GdFeO3	-2.3309422000000004	test	-2.2739627361297607	-2.3143294348600842	Pu	Pb	5.938234	6.2491650000000005	8.491208	90.0	90.0	90.0	orthorhombic	orthorhombic	4	3
1361	PuScO3	693398	Pu	Sc	-3.744295917	OrthoPerovskite_GdFeO3	-3.5895147000000005	test	-3.660224914550781	-3.642428955017517	Pu	Sc	5.596701	5.8009889999999995	7.960389	90.0	90.0	90.0	orthorhombic	orthorhombic	0	0
1362	PuSnO3	693364	Sn	Pu	-2.505215441	OrthoPerovskite_GdFeO3	-2.2759805	test	-2.515061855316162	-2.256331498788037			5.842537999999999	6.201814	8.509688	90.0	90.0	90.0	orthorhombic	other	0	3
1363	PuTaO3	682076	Ta	Pu	-2.7578755569999998	OrthoPerovskite_GdFeO3	-2.7720458999999997	train	-2.7785770893096924	-2.779800921254128			5.701626	6.471598999999999	7.238060000000001	90.0	90.0	90.0	orthorhombic	other	5	5
1364	PuTaO3	682077	Pu	Ta	-3.0495113380000003	OrthoPerovskite_GdFeO3	-3.0077775	train	-2.8700571060180664	-3.0285549857565255	Pu	Ta	5.67748	5.68251	8.137485	90.0	90.0	90.0	tetragonal	tetragonal	0	1
1365	PuTiO3	682940	Ti	Pu	-3.178229698	OrthoPerovskite_GdFeO3	-3.1938592999999997	train	-3.1913704872131348	-3.224916458210461			5.652366000000001	5.906326	8.224049	90.0	90.0	90.0	orthorhombic	other	3	1
1366	PuTiO3	682941	Pu	Ti	-3.4378115210000004	OrthoPerovskite_GdFeO3	-3.3203050000000003	train	-3.354135274887085	-3.358347367829074	Pu	Ti	5.475155	5.603330999999999	7.784811	90.0	90.0	89.952911	orthorhombic	orthorhombic	0	0
1367	PuTlO3	681740	Tl	Pu	-2.245591143	OrthoPerovskite_GdFeO3	-2.2981997000000005	test	-2.3053133487701416	-2.279778148749229	Tl	Pu	5.886149	6.121055	8.57666	90.0	90.0	90.0	orthorhombic	orthorhombic	0	1
1368	PuTlO3	681741	Pu	Tl	-2.225307029	OrthoPerovskite_GdFeO3	-2.3224971	test	-2.249865770339966	-2.30541780421689	Pu	Tl	5.78397	6.168344	8.28353	90.0	90.0	90.0	orthorhombic	orthorhombic	2	0
1369	PuVO3	682972	V	Pu	-2.8496187510000004	OrthoPerovskite_GdFeO3	-2.7610683	test	-2.7211170196533203	-2.7682168883180194			5.535547	5.781729	8.246442	90.0	90.0	90.0	orthorhombic	other	2	2
1370	PuWO3	693066	Pu	W	-2.48610914	OrthoPerovskite_GdFeO3	-2.6117318	train	-2.531502246856689	-2.6106306276997473	Pu	W	5.351236	5.990473000000001	7.82793	90.0	90.0	90.0	orthorhombic	orthorhombic	3	0
1371	PuZrO3	693103	Pu	Zr	-3.440438704	OrthoPerovskite_GdFeO3	-3.4944272000000005	test	-3.299279928207397	-3.5420885589553355	Pu	Zr	5.746874	5.879244	8.195347	90.0	90.0	90.0	orthorhombic	orthorhombic	0	0
1372	RbAcO3	681808	Ac	Rb	-1.9141154530000002	OrthoPerovskite_GdFeO3	-1.9447657999999999	test	-1.7887327671051023	-1.9068195841870996			5.980308	6.089402	11.490866	90.0	90.0	90.0	orthorhombic	other	4	4
1373	RbAcO3	681809	Rb	Ac	-2.055970945	OrthoPerovskite_GdFeO3	-2.0965102	test	-2.0699524879455566	-2.0669467638502317	Rb	Ac	6.449236	6.4544690000000005	9.146889999999999	90.0	90.0	90.0	tetragonal	tetragonal	2	3
1374	RbAgO3	693522	Rb	Ag	-0.250452597	OrthoPerovskite_GdFeO3	-0.56304646	test	-0.5194728374481201	-0.4487702525464955	Rb	Ag	4.17565383	4.17565383	8.306317	90.0	90.0	90.51560168999998	tetragonal	tetragonal	1	0
1375	RbAsO3	682278	As	Rb	-1.728426536	OrthoPerovskite_GdFeO3	-1.7748933	train	-1.446036696434021	-1.727562858223404			4.943642	5.704569	11.859033	90.0	90.0	90.0	orthorhombic	other	0	0
1376	RbAsO3	682279	Rb	As	-1.317029123	OrthoPerovskite_GdFeO3	-1.400635	train	-1.271758794784546	-1.3326294963035015			6.185237	6.254617	7.410347	90.0	90.0	90.0	orthorhombic	other	2	2
1377	RbBiO3	682546	Rb	Bi	-1.3006363490000001	OrthoPerovskite_GdFeO3	-1.3390319	train	-1.25201153755188	-1.2676232709567612	Rb	Bi	4.279356	6.04023	6.04678	90.0	90.0	90.0	tetragonal	tetragonal	3	2
1378	RbBiO3	682547	Bi	Rb	-1.204515923	OrthoPerovskite_GdFeO3	-1.2131693000000001	train	-1.1670007705688477	-1.1348076733922452			5.11479	5.767675	12.790245	90.0	90.0	90.0	orthorhombic	other	4	4
1379	RbCeO3	682752	Rb	Ce	-1.9393015630000001	OrthoPerovskite_GdFeO3	-1.9907438999999998	train	-1.9476456642150881	-1.9553376413890091	Rb	Ce	4.659073	6.568458000000001	6.581944999999999	90.0	90.0	90.0	tetragonal	tetragonal	1	4
1380	RbCeO3	682753	Ce	Rb	-2.041218149	OrthoPerovskite_GdFeO3	-2.1472008	train	-1.887357473373413	-2.1204376525646222	Rb	Ce	6.588491	6.626583	9.011484	90.0	90.0	90.0	orthorhombic	orthorhombic	0	0
1381	RbDyO3	682543	Dy	Rb	-2.017172093	OrthoPerovskite_GdFeO3	-2.0902116000000004	train	-2.0286540985107417	-2.060300211794102			5.890623000000001	6.008843	11.001255	90.0	90.0	90.0	orthorhombic	other	3	3
1382	RbErO3	682806	Rb	Er	-2.158548775	OrthoPerovskite_GdFeO3	-2.1289713	test	-2.1960244178771973	-2.101201104648066	Rb	Er	4.42299154	4.42299154	4.4244455	90.0	90.0	90.22561805	cubic	cubic	0	3
1383	RbErO3	682807	Er	Rb	-2.14584048	OrthoPerovskite_GdFeO3	-2.1226916	test	-2.1967325210571294	-2.0945744966801243	Rb	Er	6.104532	6.144807	9.519128	90.0	90.0	90.0	orthorhombic	orthorhombic	4	4
1384	RbFeO3	681882	Rb	Fe	-1.141705865	OrthoPerovskite_GdFeO3	-1.1409069	train	-1.212289571762085	-1.0585532988803086	Rb	Fe	3.8359685	5.801516	5.801992	89.961939	90.0	90.0	tetragonal	tetragonal	3	3
1385	RbFeO3	681883	Fe	Rb	-1.303546079	OrthoPerovskite_GdFeO3	-1.2306312	train	-1.3349980115890503	-1.153234216965251			5.4906120000000005	6.009643	10.406153	90.0	90.0	90.0	orthorhombic	other	0	1
1386	RbGaO3	682604	Rb	Ga	-1.130708034	OrthoPerovskite_GdFeO3	-1.0512689	test	-1.1382455825805664	-0.963963448245663	Rb	Ga	4.0074442	4.0074442	4.007408	90.0	90.0	89.89377691	cubic	cubic	2	4
1387	RbGaO3	682605	Ga	Rb	-1.370891284	OrthoPerovskite_GdFeO3	-1.5053215	test	-1.387378811836243	-1.4430991676311056			5.779104	7.0220199999999995	8.261469	90.0	90.0	90.0	orthorhombic	other	0	0
1388	RbGdO3	682464	Gd	Rb	-1.9928703209999998	OrthoPerovskite_GdFeO3	-2.036455	train	-1.91431725025177	-2.0035739487736604			6.026021000000001	6.051469999999999	6.92976665	115.88897590000002	115.77209045	90.0	error	other	3	3
1389	RbGdO3	682465	Rb	Gd	-2.0911743830000002	OrthoPerovskite_GdFeO3	-2.1176832	train	-2.0700368881225586	-2.089289418834584	Rb	Gd	4.49520014	4.49520014	4.497159	90.0	90.0	90.11150609	cubic	cubic	1	1
1390	RbGeO3	682622	Ge	Rb	-1.570832355	OrthoPerovskite_GdFeO3	-1.6374343999999998	test	-1.5188376903533936	-1.582510349026382			5.429901	6.452305	9.490998	90.0	90.0	90.0	orthorhombic	other	0	0
1391	RbGeO3	682623	Rb	Ge	-1.361791815	OrthoPerovskite_GdFeO3	-1.3927855	test	-1.4027657508850098	-1.3243463682489192	Rb	Ge	3.8110315000000003	5.957058999999999	5.956992	89.993648	90.0	90.0	tetragonal	tetragonal	1	2
1392	RbHfO3	681641	Rb	Hf	-2.726961515	OrthoPerovskite_GdFeO3	-2.7470465	train	-2.715203762054444	-2.7534204853680557	Rb	Hf	4.18387347	4.18387347	4.1845915	90.0	90.0	90.06982720000002	cubic	cubic	1	3
1393	RbHoO3	682627	Ho	Rb	-2.141317694	OrthoPerovskite_GdFeO3	-2.1710813	train	-2.1890957355499268	-2.1456373773251105	Rb	Ho	6.128858	6.180656	9.47701	90.0	90.0	90.0	orthorhombic	orthorhombic	2	0
1394	RbInO3	682586	Rb	In	-1.0409445290000001	OrthoPerovskite_GdFeO3	-1.0934191999999998	train	-1.0856032371520996	-1.0084422472059866	Rb	In	4.269433	4.271635840000001	4.27148696	90.0171103	90.0	90.0	cubic	cubic	1	3
1395	RbInO3	682587	In	Rb	-1.057429078	OrthoPerovskite_GdFeO3	-1.1277316000000002	train	-1.0276992321014404	-1.044650158927759	Rb	In	5.916685	5.969221	9.776572999999999	90.0	90.0	90.0	orthorhombic	orthorhombic	0	1
1396	RbIrO3	682024	Ir	Rb	-1.024384314	OrthoPerovskite_GdFeO3	-1.1468158000000002	train	-1.0957553386688232	-1.064788622832372			4.948811	6.571598	10.887512	90.0	90.0	90.0	orthorhombic	other	5	0
1397	RbIrO3	682025	Rb	Ir	-1.03394179	OrthoPerovskite_GdFeO3	-0.9729163000000001	train	-1.0099408626556396	-0.8812824342690452	Rb	Ir	3.9738050000000005	3.98279381	3.98279381	89.99074319	90.0	90.0	cubic	cubic	2	5
1398	RbLaO3	682847	La	Rb	-2.185615095	OrthoPerovskite_GdFeO3	-2.2453418	train	-1.9105179309844968	-2.224000232398339	Rb	La	6.5235199999999995	6.582025	9.062592	90.0	90.0	90.0	orthorhombic	orthorhombic	0	0
1399	RbLuO3	693145	Rb	Lu	-2.198733162	OrthoPerovskite_GdFeO3	-2.2531927000000005	train	-2.167590856552124	-2.232284837792788	Rb	Lu	4.3489525	4.350032470000001	4.35003247	90.68655226	90.0	90.0	cubic	cubic	3	0
1400	RbMnO3	693286	Rb	Mn	-1.2966653890000002	OrthoPerovskite_GdFeO3	-1.3170837	test	-1.50178062915802	-1.2444625917838734	Rb	Mn	3.9659535000000004	3.97208424	3.97266004	89.9816316	90.0	90.0	cubic	cubic	1	1
1401	RbMoO3	681668	Mo	Rb	-2.0890466290000003	OrthoPerovskite_GdFeO3	-2.1351151	test	-1.9174065589904783	-2.107684305124752			5.460468	6.383657	10.824963	90.0	90.0	90.0	orthorhombic	other	4	0
1402	RbMoO3	681669	Rb	Mo	-2.142282015	OrthoPerovskite_GdFeO3	-2.1119962	test	-1.9353897571563718	-2.0832882532512462	Rb	Mo	3.98320467	3.98320425	3.9856055	90.0	90.0	89.96455314	cubic	cubic	1	3
1403	RbNaO3	682550	Na	Rb	-0.9219439009999999	OrthoPerovskite_GdFeO3	-0.9845621999999999	train	-0.6019096374511719	-0.8935716859425095	Rb	Na	5.034336	6.393259650000001	6.39325965	69.94099589000001	66.81369773	66.81369773	triclinic	triclinic	1	1
1404	RbNaO3	682551	Rb	Na	-1.049128791	OrthoPerovskite_GdFeO3	-1.1516355	train	-0.7916661500930786	-1.0698745763688609	Rb	Na	5.853946	7.057803	7.389533999999999	90.0	90.0	90.0	orthorhombic	orthorhombic	0	0
1405	RbNbO3	682342	Nb	Rb	-2.537767054	OrthoPerovskite_GdFeO3	-2.5981007000000003	train	-2.3771767616271973	-2.5962465080966117			6.0270410000000005	6.083345	10.555602	90.0	90.0	90.0	orthorhombic	other	4	0
1406	RbNbO3	682343	Rb	Nb	-2.5998276540000003	OrthoPerovskite_GdFeO3	-2.5724087000000004	train	-2.5335044860839844	-2.5691352110740846	Rb	Nb	4.06928508	4.069286499999999	4.069135500000001	90.00000282	89.99999434	89.92736026	cubic	cubic	2	1
1407	RbNdO3	693222	Rb	Nd	-1.9895324019999998	OrthoPerovskite_GdFeO3	-2.0114546000000004	test	-2.0777726173400883	-1.977192457644827	Rb	Nd	6.43646	6.48201	9.156331	90.0	90.0	90.0	orthorhombic	orthorhombic	3	3
1408	RbNpO3	682292	Np	Rb	-2.483293109	OrthoPerovskite_GdFeO3	-2.4838402000000004	test	-2.5394997596740723	-2.475673942572617	Rb	Np	6.757494	7.13255	7.288619000000001	90.0	90.0	90.0	orthorhombic	orthorhombic	3	3
1409	RbNpO3	682293	Rb	Np	-2.857329998	OrthoPerovskite_GdFeO3	-2.7605152000000004	test	-2.672229528427124	-2.767633233546762	Rb	Np	4.3547855	6.147593	6.149681	90.0	90.0	90.0	tetragonal	tetragonal	0	1
1410	RbOsO3	682200	Os	Rb	-1.3147877540000001	OrthoPerovskite_GdFeO3	-1.4188482	train	-1.21321702003479	-1.351848843763049			4.970006	6.3782559999999995	11.187228	90.0	90.0	90.0	orthorhombic	other	3	0
1411	RbPbO3	682358	Pb	Rb	-1.12876838	OrthoPerovskite_GdFeO3	-1.0913563	test	-0.8322701454162598	-1.0062653869137648			5.609364	6.549739	11.023833999999999	90.0	90.0	90.0	orthorhombic	other	0	0
1412	RbPbO3	682359	Rb	Pb	-1.006599251	OrthoPerovskite_GdFeO3	-1.0210189	test	-0.969788670539856	-0.932042354717271	Rb	Pb	4.3353995	4.33956601	4.33956601	89.97807905	90.0	90.0	cubic	cubic	2	3
1413	RbPdO3	693088	Rb	Pd	-0.582865745	OrthoPerovskite_GdFeO3	-0.72132874	train	-0.6425223350524902	-0.6157964827536742	Rb	Pd	5.667282	5.713592	8.173088	90.0	90.0	90.0	orthorhombic	orthorhombic	1	3
1414	RbPmO3	693214	Rb	Pm	-2.02273182	OrthoPerovskite_GdFeO3	-2.0553648	test	-2.0058629512786865	-2.0235283783407074	Rb	Pm	6.430866	6.4457260000000005	9.12459	90.0	90.0	90.0	tetragonal	tetragonal	2	1
1415	RbPrO3	682450	Pr	Rb	-2.061383444	OrthoPerovskite_GdFeO3	-2.0807807	train	-1.9158720970153809	-2.0503483228368484	Rb	Pr	6.505227	6.575747	9.157956	90.0	90.0	90.0	orthorhombic	orthorhombic	0	0
1416	RbPrO3	682451	Rb	Pr	-1.9692331140000001	OrthoPerovskite_GdFeO3	-2.052276	train	-1.9851365089416504	-2.0202689444996995	Rb	Pr	6.516233000000001	6.539097	9.23922	90.0	90.0	90.0	tetragonal	tetragonal	2	2
1417	RbPtO3	681798	Rb	Pt	-0.739143771	OrthoPerovskite_GdFeO3	-0.7193461	test	-0.7375259399414062	-0.6137043162454714	Rb	Pt	5.668348	5.73602	8.111797	90.0	90.0	90.0	orthorhombic	orthorhombic	2	3
1418	RbPtO3	681799	Pt	Rb	-0.819488817	OrthoPerovskite_GdFeO3	-0.90064067	test	-0.7071506977081299	-0.8050140988953768			6.436422	6.599341000000001	9.896649	90.0	90.0	90.0	orthorhombic	other	0	1
1419	RbPuO3	682518	Rb	Pu	-2.628637773	OrthoPerovskite_GdFeO3	-2.6186087000000002	train	-2.6544873714447017	-2.6178874266447196	Rb	Pu	4.3536055000000005	6.151141	6.153961	90.0	90.0	90.0	tetragonal	tetragonal	0	0
1420	RbPuO3	682519	Pu	Rb	-2.31467298	OrthoPerovskite_GdFeO3	-2.3613212000000003	train	-2.4194276332855225	-2.34638665470468			5.585271	5.7123040000000005	11.817876	90.0	90.0	90.0	orthorhombic	other	4	4
1421	RbReO3	682852	Re	Rb	-1.668029389	OrthoPerovskite_GdFeO3	-1.6775118999999998	train	-1.6119115352630615	-1.6248018407911469			5.056979	6.479694	11.000577	90.0	90.0	90.0	orthorhombic	other	4	4
1422	RbRhO3	681804	Rh	Rb	-0.99885713	OrthoPerovskite_GdFeO3	-1.0267954	train	-1.0323051214218142	-0.9381379645277422			5.055984	6.278797	11.126344	90.0	90.0	90.0	orthorhombic	other	0	2
1423	RbRhO3	681805	Rb	Rh	-0.9408179309999999	OrthoPerovskite_GdFeO3	-0.98380166	train	-1.0094609260559082	-0.892769131612854	Rb	Rh	3.995431	5.646183000000001	5.652139	90.0	90.0	90.0	tetragonal	tetragonal	5	3
1424	RbRuO3	682950	Ru	Rb	-1.330120215	OrthoPerovskite_GdFeO3	-1.4550549	test	-1.223231554031372	-1.390055701847493			5.144504	6.020682	11.378928	90.0	90.0	90.0	orthorhombic	other	0	0
1425	RbRuO3	682951	Rb	Ru	-1.264819567	OrthoPerovskite_GdFeO3	-1.2722545	test	-1.2373186349868774	-1.197156902990386	Rb	Ru	3.94899099	3.94899099	3.9532195	90.0	90.0	90.02303233	cubic	cubic	2	1
1426	RbSbO3	681513	Sb	Rb	-1.605261761	OrthoPerovskite_GdFeO3	-1.6624917000000001	train	-1.4563131332397459	-1.608951883468332			5.206276	5.919618	12.181341	90.0	90.0	90.0	orthorhombic	other	4	1
1427	RbSbO3	681514	Rb	Sb	-1.640901655	OrthoPerovskite_GdFeO3	-1.5776571000000001	train	-1.5604187250137331	-1.5194307859131673	Rb	Sb	4.05249296	4.05249296	4.0523725	90.0	90.0	89.99439148000002	cubic	cubic	2	2
1428	RbScO3	682689	Sc	Rb	-2.175338313	OrthoPerovskite_GdFeO3	-2.2180942999999997	train	-2.0087032318115234	-2.1952475052606575	Rb	Sc	6.446683	7.437597	6.942936	90.0	90.0	90.0	orthorhombic	orthorhombic	0	0
1429	RbScO3	682690	Rb	Sc	-2.135663998	OrthoPerovskite_GdFeO3	-2.1546004	train	-2.120524406433105	-2.12824602690091	Rb	Sc	4.21046988	4.21046988	4.211375	90.0	90.0	89.80511065999998	cubic	cubic	3	2
1430	RbSmO3	682616	Sm	Rb	-1.950549515	OrthoPerovskite_GdFeO3	-2.0213156000000003	train	-1.8716661930084229	-1.987598206513702			6.107345	6.170081	10.798425	90.0	90.0	90.0	orthorhombic	other	3	3
1431	RbSnO3	682881	Sn	Rb	-1.372150531	OrthoPerovskite_GdFeO3	-1.4535308	train	-1.2740343809127808	-1.388447406355043			5.698373	6.612861	9.958535000000001	90.0	90.0	90.0	orthorhombic	other	3	3
1432	RbTaO3	681859	Ta	Rb	-2.6890381580000002	OrthoPerovskite_GdFeO3	-2.6359196	test	-2.304781198501587	-2.6361546285607735			5.930365	5.983636	11.045334	90.0	90.0	90.0	orthorhombic	other	3	3
1433	RbTbO3	682665	Tb	Rb	-2.002463086	OrthoPerovskite_GdFeO3	-1.9826526999999998	test	-1.9762108325958248	-1.9467994611590278	Rb	Tb	6.214791	6.262926000000001	6.47027646	118.94544982	118.70218782	90.0	error	other	0	4
1434	RbTbO3	682666	Rb	Tb	-1.9786405790000001	OrthoPerovskite_GdFeO3	-2.0689127	test	-1.9562544822692869	-2.0378247017461057	Rb	Tb	4.47585545	4.47585545	4.4812045	90.0	90.0	90.11121862	cubic	cubic	2	3
1435	RbTcO3	681470	Tc	Rb	-1.7027642219999999	OrthoPerovskite_GdFeO3	-1.7648671999999999	train	-1.5638446807861328	-1.716982888774643			5.189989	6.226479	11.163317999999999	90.0	90.0	90.0	orthorhombic	other	3	0
1436	RbTeO3	682228	Te	Rb	-1.372087162	OrthoPerovskite_GdFeO3	-1.4770901	train	-1.158653974533081	-1.4133081871406115			6.065805	6.331457	10.881752	90.0	90.0	90.0	orthorhombic	other	4	0
1437	RbTeO3	682229	Rb	Te	-1.40986948	OrthoPerovskite_GdFeO3	-1.4413025	train	-1.3013341426849363	-1.375543581297415	Rb	Te	4.133074	4.133851860000001	4.13385143	89.98351539	90.0	90.0	cubic	cubic	1	2
1438	RbThO3	682286	Th	Rb	-2.6761097719999998	OrthoPerovskite_GdFeO3	-2.70819	train	-2.415111303329468	-2.7124174450148004			5.905752	5.957711	11.945474	90.0	90.0	90.0	orthorhombic	other	4	4
1439	RbThO3	682287	Rb	Th	-2.83011528	OrthoPerovskite_GdFeO3	-2.8347309	train	-2.603245973587036	-2.845948813744285	Rb	Th	4.557417500000001	4.56175097	4.56175097	90.01966318	90.0	90.0	cubic	cubic	1	2
1440	RbTiO3	681938	Rb	Ti	-2.337139599	OrthoPerovskite_GdFeO3	-2.3537247000000003	train	-2.379237413406372	-2.338370503068699	Rb	Ti	3.99504789	3.994896	3.99505591	90.0	89.98116797	90.0	cubic	cubic	4	3
1441	RbTiO3	681939	Ti	Rb	-2.35410362	OrthoPerovskite_GdFeO3	-2.4415271	train	-2.251810312271118	-2.4310233500907583			5.978738	6.680038000000001	8.597864999999999	90.0	90.0	90.0	orthorhombic	other	1	0
1442	RbTlO3	682744	Tl	Rb	-0.733921188	OrthoPerovskite_GdFeO3	-0.8341936	train	-0.6015626192092896	-0.7348963092703314	Rb	Tl	6.418514	6.520263	8.950142999999999	90.0	90.0	90.0	orthorhombic	orthorhombic	0	1
1443	RbTlO3	682745	Rb	Tl	-0.594555576	OrthoPerovskite_GdFeO3	-0.80458933	train	-0.6213521957397461	-0.7036566176501736	Rb	Tl	4.3120895	4.34420922	4.34420922	90.02088099	90.0	90.0	tetragonal	tetragonal	2	2
1444	RbTmO3	682448	Tm	Rb	-2.055235643	OrthoPerovskite_GdFeO3	-2.1373892000000003	train	-2.1765885353088383	-2.110084032688154			5.81513	5.857789000000001	6.92895319	115.00540464	114.81094195	90.0	error	other	3	3
1445	RbUO3	682813	Rb	U	-3.113951055	OrthoPerovskite_GdFeO3	-3.1098464	train	-3.085124254226685	-3.136262453632231	Rb	U	4.36785141	4.367851409999999	4.3723005	90.0	90.0	90.02883769000002	cubic	cubic	1	0
1446	RbVO3	682492	Rb	V	-2.012841141	OrthoPerovskite_GdFeO3	-2.1566944	test	-2.0841660499572754	-2.1304557052430075	Rb	V	3.873822	3.88806717	3.88810348	90.00152133	90.0	90.0	cubic	cubic	2	2
1447	RbVO3	682493	V	Rb	-2.339122714	OrthoPerovskite_GdFeO3	-2.3575463	test	-2.1957826614379883	-2.342403218805165			5.618223	5.953401	10.660352	90.0	90.0	90.0	orthorhombic	other	0	0
1448	RbWO3	682356	W	Rb	-2.138454575	OrthoPerovskite_GdFeO3	-2.13555	test	-2.055550098419189	-2.1081432302016276			5.339876	6.541918	10.783203	90.0	90.0	90.0	orthorhombic	other	3	1
1449	RbYO3	682442	Y	Rb	-2.134651942	OrthoPerovskite_GdFeO3	-2.1860816	train	-2.076162815093994	-2.1614663353169763	Rb	Y	6.1638269999999995	6.252744999999999	6.47337248	118.87882787	118.43039989	90.0	error	other	0	0
1450	RbYO3	682443	Rb	Y	-2.1065987809999998	OrthoPerovskite_GdFeO3	-2.121377	train	-2.060523509979248	-2.0931872745461595	Rb	Y	4.47784815	4.47784815	4.4847585	90.0	90.0	90.60096015	cubic	cubic	1	4
1451	RbZrO3	681380	Zr	Rb	-2.463929008	OrthoPerovskite_GdFeO3	-2.4846527999999997	train	-2.4432854652404785	-2.476531432840423	Rb	Zr	6.545789	7.220947	7.247145	90.0	90.0	90.0	tetragonal	tetragonal	3	3
1452	ReAgO3	693048	Ag	Re	-1.214456833	OrthoPerovskite_GdFeO3	-1.2025594	train	-1.180624008178711	-1.1236116532194553	Ag	Re	5.421619000000001	5.499337000000001	7.717160000000001	90.0	90.0	90.0	orthorhombic	orthorhombic	3	0
1453	RePbO3	682238	Pb	Re	-1.3654805190000001	OrthoPerovskite_GdFeO3	-1.4141353	test	-1.431684136390686	-1.3468755901534637	Pb	Re	5.57526	5.664704	7.9269490000000005	90.0	90.0	90.0	orthorhombic	orthorhombic	3	0
1454	RePbO3	682239	Re	Pb	-1.09588192	OrthoPerovskite_GdFeO3	-1.1478271	test	-1.0369895696640017	-1.0658557898368433			5.085857	6.5511669999999995	8.497002	90.0	90.0	90.0	orthorhombic	other	5	5
1455	ReSnO3	693212	Sn	Re	-1.3449129030000002	OrthoPerovskite_GdFeO3	-1.3646945	train	-1.353124737739563	-1.294703543842107			5.519598	5.57112	8.216788000000001	90.0	90.0	90.0	orthorhombic	other	0	2
1456	RhPbO3	681638	Pb	Rh	-1.084730156	OrthoPerovskite_GdFeO3	-1.1854694	train	-0.9344887733459472	-1.1055775544293653	Pb	Rh	5.49067	5.6935970000000005	7.819601	90.0	90.0	90.0	orthorhombic	orthorhombic	0	0
1457	RhPbO3	681639	Rh	Pb	-0.7744160520000001	OrthoPerovskite_GdFeO3	-0.9297951999999999	train	-0.738183856010437	-0.8357792056360813			5.682302	5.765915000000001	8.305777	90.0	90.0	90.0	orthorhombic	other	4	4
1458	RuAuO3	693454	Au	Ru	-0.5983375679999999	OrthoPerovskite_GdFeO3	-0.7685337	train	-0.701654314994812	-0.6656091750896744			3.6848004999999997	5.540865	5.587598000000001	90.0	90.0	90.0	orthorhombic	other	0	0
1459	RuPbO3	682110	Pb	Ru	-1.176359115	OrthoPerovskite_GdFeO3	-1.2973173	train	-1.1176538467407229	-1.2236042412675225	Pb	Ru	5.531472	5.632867	7.877849	90.0	90.0	90.0	orthorhombic	orthorhombic	0	0
1460	RuPbO3	682111	Ru	Pb	-0.891990625	OrthoPerovskite_GdFeO3	-0.9689954	train	-0.9531295299530028	-0.8771449329263848			5.911657	5.943504	8.483914	90.0	90.0	90.0	orthorhombic	other	5	5
1461	SbAuO3	693228	Au	Sb	-0.8668143859999999	OrthoPerovskite_GdFeO3	-1.0039142	test	-0.913139581680298	-0.9139927438585905			5.583642	5.6669089999999995	7.834392	90.0	90.0	90.0	orthorhombic	other	1	0
1462	SbPbO3	682904	Pb	Sb	-1.446732291	OrthoPerovskite_GdFeO3	-1.4462419	test	-1.4172821044921875	-1.380755847392428	Pb	Sb	5.8561760000000005	5.968825	8.357305	90.0	90.0	90.0	orthorhombic	orthorhombic	0	2
1463	SbPbO3	682905	Sb	Pb	-1.312131674	OrthoPerovskite_GdFeO3	-1.3419478	test	-1.2199225425720217	-1.2707002533243459			5.861729	6.31391	8.461284	90.0	90.0	90.0	orthorhombic	other	4	4
1464	ScAgO3	682771	Sc	Ag	-1.821915107	OrthoPerovskite_GdFeO3	-1.7864672	test	-1.76805317401886	-1.739776132418057			5.176319	5.5164550000000006	8.060358	90.0	90.0	90.0	orthorhombic	other	0	3
1465	ScAgO3	682772	Ag	Sc	-1.781296526	OrthoPerovskite_GdFeO3	-1.7961246	test	-1.756714940071106	-1.7499670338607378			5.276224	5.635196	7.918455000000001	90.0	90.0	90.0	orthorhombic	other	1	2
1466	ScAlO3	693306	Sc	Al	-3.5082029130000003	OrthoPerovskite_GdFeO3	-3.3123392999999997	train	-3.4878530502319336	-3.3499416205656316	Sc	Al	4.938817	5.229987	7.217849	90.0	90.0	90.0	orthorhombic	orthorhombic	0	0
1467	ScBiO3	693120	Bi	Sc	-2.608075194	OrthoPerovskite_GdFeO3	-2.5618133999999997	train	-2.4581685066223145	-2.5579545974456086	Bi	Sc	5.560084	5.854926	8.032688	90.0	90.0	90.0	orthorhombic	orthorhombic	0	0
1468	ScCdO3	693490	Cd	Sc	-2.209155214	OrthoPerovskite_GdFeO3	-2.2291286	train	-2.2474770545959477	-2.20689137046133	Cd	Sc	5.459568	5.707612	7.8106729999999995	90.0	90.0	90.0	orthorhombic	orthorhombic	0	0
1469	ScHgO3	693472	Hg	Sc	-1.871245755	OrthoPerovskite_GdFeO3	-1.9666107	test	-1.8929184675216677	-1.9298712567827483	Hg	Sc	5.5176989999999995	5.704818	8.001161	90.0	90.0	90.0	orthorhombic	orthorhombic	0	1
1470	ScInO3	682653	Sc	In	-2.676905409	OrthoPerovskite_GdFeO3	-2.5963216	train	-2.645660638809204	-2.5943691257000374			5.3166720000000005	5.580873	8.08196	90.0	90.0	90.0	orthorhombic	other	1	2
1471	ScInO3	682654	In	Sc	-2.7155533889999997	OrthoPerovskite_GdFeO3	-2.7093694	train	-2.6279222965240483	-2.7136619983274413			5.3547	5.55285	7.959776	90.0	90.0	90.0	orthorhombic	other	0	0
1472	ScPbO3	682750	Pb	Sc	-2.4018411790000003	OrthoPerovskite_GdFeO3	-2.3280807	train	-2.425971508026123	-2.3113098576987126	Pb	Sc	5.581971	5.812366	8.068667	90.0	90.0	90.0	orthorhombic	orthorhombic	0	1
1473	ScPbO3	682751	Sc	Pb	-2.255924341	OrthoPerovskite_GdFeO3	-2.3108767999999995	train	-2.226606845855713	-2.2931555667581134			5.723749	5.875751	8.251911999999999	90.0	90.0	90.0	orthorhombic	other	3	3
1474	ScTlO3	682657	Sc	Tl	-2.17495337	OrthoPerovskite_GdFeO3	-2.1526357999999997	train	-2.0855507850646973	-2.12617289697212			5.516598	5.733736	8.30724	90.0	90.0	90.0	orthorhombic	other	2	2
1475	ScTlO3	682658	Tl	Sc	-2.295770729	OrthoPerovskite_GdFeO3	-2.2888231	train	-2.2268660068511963	-2.269883559473912	Tl	Sc	5.489776999999999	5.647346	8.053421	90.0	90.0	90.0	orthorhombic	orthorhombic	0	1
1476	SiAgO3	693401	Ag	Si	-1.563318002	OrthoPerovskite_GdFeO3	-1.5604374	train	-1.8247286081314087	-1.5012598221369406			3.4887080000000004	5.133076	5.1544099999999995	90.0	90.0	90.0	tetragonal	other	1	1
1477	SiGeO3	693449	Ge	Si	-1.959742471	OrthoPerovskite_GdFeO3	-2.0192282	train	-2.0480406284332275	-1.9853954927738284	Ge	Si	5.036444	5.058732	7.328942	90.0	90.0	90.0	tetragonal	tetragonal	1	2
1478	SiHgO3	693460	Hg	Si	-1.6158642680000002	OrthoPerovskite_GdFeO3	-1.6146139	train	-1.866783618927002	-1.5584291815928393	Hg	Si	5.144423000000001	5.171386	7.285812	90.0	90.0	90.0	orthorhombic	orthorhombic	2	2
1479	SiPbO3	693226	Pb	Si	-2.010807001	OrthoPerovskite_GdFeO3	-2.0528948000000002	train	-1.9941244125366209	-2.020921928720373	Pb	Si	3.714254	3.72081398	3.72081398	90.020808	90.0	90.0	cubic	cubic	3	2
1480	SmAgO3	693325	Sm	Ag	-1.923825827	OrthoPerovskite_GdFeO3	-1.9703054	test	-2.0691204071044917	-1.9337700622128096	Sm	Ag	5.5244919999999995	6.008603	7.87109	90.0	90.0	90.0	orthorhombic	orthorhombic	0	0
1481	SmAlO3	681868	Sm	Al	-3.5368983010000004	OrthoPerovskite_GdFeO3	-3.5248086000000005	train	-3.605544090270996	-3.5741483113825585	Sm	Al	5.288021	5.305207	7.481289	90.0	90.0	90.0	tetragonal	tetragonal	0	0
1482	SmAlO3	681869	Al	Sm	-3.267355672	OrthoPerovskite_GdFeO3	-3.1914926	train	-3.3814969062805176	-3.222419015167366			5.450227	5.4622269999999995	8.550947	90.0	90.0	90.0	tetragonal	other	4	5
1483	SmCoO3	681404	Co	Sm	-2.294972993	OrthoPerovskite_GdFeO3	-2.3627625	train	-2.3187880516052246	-2.3479075760964974			5.511774	5.625292	8.508403999999999	90.0	90.0	90.0	orthorhombic	other	4	2
1484	SmCoO3	681405	Sm	Co	-2.486737871	OrthoPerovskite_GdFeO3	-2.386661	train	-2.550088167190552	-2.3731262952266885	Sm	Co	5.289327	5.545648	7.610496	90.0	90.0	90.0	orthorhombic	orthorhombic	0	1
1485	SmCrO3	682232	Cr	Sm	-2.782471443	OrthoPerovskite_GdFeO3	-2.7557366	train	-2.812282085418701	-2.762590650487761			5.606038	5.682429	8.259333	90.0	90.0	90.0	orthorhombic	other	5	5
1486	SmCrO3	682233	Sm	Cr	-3.150945737	OrthoPerovskite_GdFeO3	-3.0940335	train	-3.0717549324035645	-3.1195760053725583	Sm	Cr	5.363987	5.595471	7.691472999999999	90.0	90.0	90.0	orthorhombic	orthorhombic	0	0
1487	SmCuO3	681940	Sm	Cu	-2.218475935	OrthoPerovskite_GdFeO3	-2.2445364	train	-2.4167048931121826	-2.223150339878413	Sm	Cu	5.276632	5.748628	7.408614999999999	90.0	90.0	90.0	orthorhombic	orthorhombic	0	0
1488	SmCuO3	681941	Cu	Sm	-1.93254221	OrthoPerovskite_GdFeO3	-1.9854247999999999	train	-2.0780270099639893	-1.9497246996175424			5.63502	5.6486019999999995	8.15577	90.0	90.0	90.0	tetragonal	other	4	4
1489	SmEuO3	693373	Eu	Sm	-3.075104563	OrthoPerovskite_GdFeO3	-3.0457516	train	-3.2004616260528564	-3.068626879897237			5.955351	6.16886	8.438275	90.0	90.0	90.0	orthorhombic	other	0	0
1490	SmFeO3	681794	Sm	Fe	-2.734155866	OrthoPerovskite_GdFeO3	-2.6594113999999998	train	-2.8419981002807617	-2.6609441804599565	Sm	Fe	5.3826480000000005	5.638382	7.710072	90.0	90.0	90.0	orthorhombic	orthorhombic	0	1
1491	SmFeO3	681795	Fe	Sm	-2.543662627	OrthoPerovskite_GdFeO3	-2.5075011000000003	train	-2.597015380859375	-2.50064193602273			5.591257	5.605346	8.498942	90.0	90.0	90.0	tetragonal	other	2	4
1492	SmGaO3	682330	Sm	Ga	-2.9208965680000003	OrthoPerovskite_GdFeO3	-2.9372307999999996	train	-3.0605363845825195	-2.954111091250098	Sm	Ga	5.362312	5.585548999999999	7.676394	90.0	90.0	90.0	orthorhombic	orthorhombic	0	0
1493	SmGaO3	682331	Ga	Sm	-2.7408141010000002	OrthoPerovskite_GdFeO3	-2.7331924	train	-2.8829832077026367	-2.7388010466291566			5.557237000000001	5.596277	8.529835	90.0	90.0	90.0	orthorhombic	other	4	3
1494	SmGeO3	693242	Sm	Ge	-2.530948305	OrthoPerovskite_GdFeO3	-2.5123706	test	-2.657813549041748	-2.50578044064873	Sm	Ge	5.442401	5.820543	7.873900999999999	90.0	90.0	90.0	orthorhombic	orthorhombic	0	0
1495	SmHfO3	693126	Sm	Hf	-3.4075242660000002	OrthoPerovskite_GdFeO3	-3.2864214999999994	train	-3.3019728660583496	-3.3225920497276094	Sm	Hf	5.549878	6.0891910000000005	7.681953999999999	90.0	90.0	90.0	orthorhombic	orthorhombic	0	2
1496	SmMgO3	682554	Mg	Sm	-2.805351617	OrthoPerovskite_GdFeO3	-2.8129666	train	-2.826105117797852	-2.822982193715195			5.593338	5.790015	8.367712	90.0	90.0	90.0	orthorhombic	other	2	2
1497	SmMgO3	682555	Sm	Mg	-2.88064778	OrthoPerovskite_GdFeO3	-2.8960397	train	-2.970397472381592	-2.9106444811463845	Sm	Mg	5.345776	5.7484980000000006	7.678311	90.0	90.0	90.0	orthorhombic	orthorhombic	0	0
1498	SmMnO3	682116	Mn	Sm	-2.617668782	OrthoPerovskite_GdFeO3	-2.535266	train	-2.7314000129699707	-2.529940645765092			5.668981	5.705995	8.201645	90.0	90.0	90.0	orthorhombic	other	4	5
1499	SmMnO3	682117	Sm	Mn	-2.9126835819999997	OrthoPerovskite_GdFeO3	-2.7657342000000003	train	-2.9771478176116943	-2.7731405455178257	Sm	Mn	5.375807	5.749137999999999	7.598841999999999	90.0	90.0	90.0	orthorhombic	orthorhombic	0	0
1500	SmMoO3	693425	Sm	Mo	-2.637118891	OrthoPerovskite_GdFeO3	-2.7006521	train	-2.567760705947876	-2.70446313060463	Sm	Mo	5.470372	5.882615	7.886587	90.0	90.0	90.0	orthorhombic	orthorhombic	0	0
1501	SmNbO3	693416	Sm	Nb	-2.950042771	OrthoPerovskite_GdFeO3	-2.9791803	train	-2.908401727676392	-2.998377997463959	Sm	Nb	5.473368	5.995796	7.763185000000001	90.0	90.0	90.0	orthorhombic	orthorhombic	0	0
1502	SmNiO3	681517	Ni	Sm	-2.050713116	OrthoPerovskite_GdFeO3	-2.054968	test	-1.9790438413619995	-2.0231096580130363			5.712127	5.762569999999999	7.928422	90.0	90.0	90.0	orthorhombic	other	4	5
1503	SmNiO3	681518	Sm	Ni	-2.355631378	OrthoPerovskite_GdFeO3	-2.3742118	test	-2.4544389247894287	-2.359989367043096	Sm	Ni	5.280201	5.476864	7.544204	90.0	90.0	90.0	orthorhombic	orthorhombic	0	1
1504	SmPdO3	693098	Sm	Pd	-2.1662451430000003	OrthoPerovskite_GdFeO3	-2.192323	train	-2.2453808784484863	-2.168052527487162	Sm	Pd	5.466346	5.931441	7.642088	90.0	90.0	90.0	orthorhombic	orthorhombic	0	0
1505	SmRuO3	693309	Sm	Ru	-2.3709352530000003	OrthoPerovskite_GdFeO3	-2.4290729	test	-2.3160300254821777	-2.4178811456933595	Sm	Ru	5.294783	5.864153	7.7022759999999995	90.0	90.0	90.0	orthorhombic	orthorhombic	0	0
1506	SmScO3	682720	Sc	Sm	-3.5559850060000002	OrthoPerovskite_GdFeO3	-3.1929476	train	-3.474592685699463	-3.2239543933850126			5.705645	5.840304	8.359867999999999	90.0	90.0	90.0	orthorhombic	other	2	4
1507	SmScO3	682721	Sm	Sc	-3.760382312	OrthoPerovskite_GdFeO3	-3.6711322999999996	train	-3.7535886764526367	-3.728555336609678	Sm	Sc	5.511347	5.777533	7.954275999999999	90.0	90.0	90.0	orthorhombic	orthorhombic	0	0
1508	SmTcO3	693374	Sm	Tc	-2.497407015	OrthoPerovskite_GdFeO3	-2.5166104	train	-2.473168134689331	-2.510254458907959	Sm	Tc	5.340408	5.902228	7.715606	90.0	90.0	90.0	orthorhombic	orthorhombic	0	0
1509	SmTiO3	682038	Sm	Ti	-3.420522788	OrthoPerovskite_GdFeO3	-3.221302	train	-3.421858549118042	-3.253875168735143	Sm	Ti	5.398217	5.700325	7.738123	90.0	90.0	90.0	orthorhombic	orthorhombic	0	1
1510	SmTiO3	682039	Ti	Sm	-3.15710744	OrthoPerovskite_GdFeO3	-2.9732515999999998	train	-3.2054522037506104	-2.992121779705222			5.684807	5.730836	8.179876	90.0	90.0	90.0	orthorhombic	other	4	5
1511	SmTlO3	682693	Tl	Sm	-2.210914308	OrthoPerovskite_GdFeO3	-2.1328423	test	-2.2109649181365967	-2.105285949376939			5.900723	5.98303	8.622863	90.0	90.0	90.0	orthorhombic	other	2	2
1512	SmTlO3	682694	Sm	Tl	-2.246895958	OrthoPerovskite_GdFeO3	-2.2650497000000005	test	-2.248739004135132	-2.2447968512131564			5.683593	6.0435	8.457929	90.0	90.0	90.0	orthorhombic	other	0	0
1513	SmVO3	681680	Sm	V	-3.223044307	OrthoPerovskite_GdFeO3	-3.0724527999999998	train	-3.1444306373596187	-3.096803127914437	Sm	V	5.397994000000001	5.694945	7.718344999999999	90.0	90.0	90.0	orthorhombic	orthorhombic	0	0
1514	SmVO3	681681	V	Sm	-2.954734267	OrthoPerovskite_GdFeO3	-2.9349572999999998	train	-2.9041333198547363	-2.9517119968323526			5.65465	5.740486	8.271384	90.0	90.0	90.0	orthorhombic	other	3	2
1515	SmZnO3	681700	Zn	Sm	-2.311146838	OrthoPerovskite_GdFeO3	-2.3443196	train	-2.289005756378174	-2.328445839374686			5.451215	5.759234999999999	8.589719	90.0	90.0	90.0	orthorhombic	other	2	1
1516	SmZnO3	681701	Sm	Zn	-2.402177632	OrthoPerovskite_GdFeO3	-2.4065464	train	-2.5746490955352783	-2.3941102196316297	Sm	Zn	5.327308	5.78414	7.5947070000000005	90.0	90.0	90.0	orthorhombic	orthorhombic	0	0
1517	SmZrO3	693349	Sm	Zr	-3.352808938	OrthoPerovskite_GdFeO3	-3.2682617	test	-3.3434596061706543	-3.303429052231514	Sm	Zr	5.599253	6.13162	7.74303	90.0	90.0	90.0	orthorhombic	orthorhombic	0	1
1518	Sn2O3	681601	Sn	Sn	-1.599506946	OrthoPerovskite_GdFeO3	-1.5805773	test	-1.4440093040466309	-1.5225123058246255			5.6816830000000005	5.776243	8.173017	90.0	90.0	90.0	orthorhombic	other	0	0
1519	SnAsO3	693467	Sn	As	-1.197504731	OrthoPerovskite_GdFeO3	-1.2840519	train	-1.0914424657821655	-1.2096060239421826			5.566058	5.644229	8.001706	90.0	90.0	90.0	orthorhombic	other	1	2
1520	SnBiO3	693266	Bi	Sn	-1.4654456630000001	OrthoPerovskite_GdFeO3	-1.5238155	train	-1.4096541404724119	-1.4626148272580175	Bi	Sn	5.709816	6.189244	8.282736	90.0	90.0	90.0	orthorhombic	orthorhombic	0	0
1521	SnGeO3	681950	Ge	Sn	-1.5248733890000001	OrthoPerovskite_GdFeO3	-1.5641196000000002	train	-1.517141342163086	-1.5051454370324862			5.274183	5.879216	7.909256	90.0	90.0	90.0	orthorhombic	other	0	0
1522	SnGeO3	681951	Sn	Ge	-1.495238518	OrthoPerovskite_GdFeO3	-1.5307053	train	-1.4098575115203855	-1.4698852388346098	Sn	Ge	5.398855999999999	5.418393	7.788154	90.0	90.0	90.0	tetragonal	tetragonal	1	1
1523	SnHgO3	693083	Hg	Sn	-1.286892249	OrthoPerovskite_GdFeO3	-1.432993	train	-1.142181634902954	-1.366775041572649	Hg	Sn	5.605163	5.664956	8.057319999999999	90.0	90.0	90.0	orthorhombic	orthorhombic	1	0
1524	SnMoO3	681358	Mo	Sn	-1.544806717	OrthoPerovskite_GdFeO3	-1.6696543999999998	train	-1.4320862293243408	-1.6165102707944745			5.469901	6.511408	6.736819000000001	90.0	90.0	90.0	orthorhombic	other	4	2
1525	SnMoO3	681359	Sn	Mo	-1.681108321	OrthoPerovskite_GdFeO3	-1.7518723999999999	train	-1.616102933883667	-1.7032702201405026	Sn	Mo	5.5838209999999995	5.6576900000000006	8.02027	90.0	90.0	90.0	orthorhombic	orthorhombic	0	0
1526	SnPbO3	682663	Pb	Sn	-1.6527809619999998	OrthoPerovskite_GdFeO3	-1.6469365000000002	train	-1.5036562681198118	-1.5925373712682382	Pb	Sn	5.796396	5.835291000000001	8.194874	90.0	90.0	90.0	orthorhombic	orthorhombic	1	0
1527	SnRuO3	693479	Sn	Ru	-1.225245185	OrthoPerovskite_GdFeO3	-1.2651963	train	-1.2661163806915283	-1.1897087885327957			5.371865000000001	5.5360949999999995	7.832933000000001	90.0	90.0	90.0	orthorhombic	other	0	1
1528	SnSbO3	693233	Sn	Sb	-1.371082028	OrthoPerovskite_GdFeO3	-1.4218802	train	-1.4555325508117676	-1.355048339815217	Sn	Sb	5.7478110000000004	5.947888	8.313719	90.0	90.0	90.0	orthorhombic	orthorhombic	1	0
1529	SnWO3	681678	W	Sn	-1.618072622	OrthoPerovskite_GdFeO3	-1.6357411	train	-1.425366997718811	-1.580723506458725			5.534776	6.461511	6.7479759999999995	90.0	90.0	90.0	orthorhombic	other	4	5
1530	SnWO3	681679	Sn	W	-1.677556377	OrthoPerovskite_GdFeO3	-1.7106417	train	-1.713786005973816	-1.6597618224234423	Sn	W	5.576543	5.729433	8.007856	90.0	90.0	90.0	orthorhombic	orthorhombic	1	2
1531	SrAcO3	693410	Sr	Ac	-2.874192685	OrthoPerovskite_GdFeO3	-2.854082	test	-2.8674194812774663	-2.866368921941881	Sr	Ac	6.232213	6.480288	8.981036999999999	90.0	90.0	90.0	orthorhombic	orthorhombic	0	0
1532	SrAgO3	682868	Sr	Ag	-1.309828411	OrthoPerovskite_GdFeO3	-1.366465	train	-1.2850717306137085	-1.2965718511509343	Sr	Ag	5.70319	5.839128	8.03994	90.0	90.0	90.0	orthorhombic	orthorhombic	0	1
1533	SrAgO3	682869	Ag	Sr	-1.046981476	OrthoPerovskite_GdFeO3	-1.0591271999999998	train	-0.907633900642395	-0.9722558624365444			6.336933	6.413678	7.023814999999999	90.0	90.0	90.0	orthorhombic	other	3	3
1534	SrAlO3	681962	Sr	Al	-2.869732878	OrthoPerovskite_GdFeO3	-2.8264937000000003	train	-2.940301418304444	-2.8372565680711594	Sr	Al	3.79974209	3.79974308	3.8013035000000004	90.0	90.0	89.99905105	cubic	cubic	0	2
1535	SrAlO3	681963	Al	Sr	-2.765060544	OrthoPerovskite_GdFeO3	-2.765743	train	-2.796744108200073	-2.7731498316541248			5.2585	5.926132	8.791456	90.0	90.0	90.0	orthorhombic	other	4	4
1536	SrAsO3	681828	Sr	As	-2.1159258430000003	OrthoPerovskite_GdFeO3	-2.1873221000000003	train	-2.06420636177063	-2.1627753639623313	Sr	As	5.570624	5.578665	7.883423	90.0	90.0	90.0	tetragonal	tetragonal	1	1
1537	SrAuO3	682568	Sr	Au	-1.375520232	OrthoPerovskite_GdFeO3	-1.4154545	test	-1.2046127319335938	-1.34826766640413	Sr	Au	5.783304	5.937278	7.910475999999999	90.0	90.0	90.0	orthorhombic	orthorhombic	0	1
1538	SrAuO3	682569	Au	Sr	-1.126565412	OrthoPerovskite_GdFeO3	-1.1705371999999998	test	-0.9721733331680298	-1.089820458469542			6.1662	6.182081	8.372836	90.0	90.0	90.0	tetragonal	other	3	4
1539	SrBeO3	693506	Sr	Be	-2.0137804669999997	OrthoPerovskite_GdFeO3	-2.0973108	train	-2.243260622024536	-2.067791591204904	Sr	Be	3.4830665	5.513264000000001	5.519618	89.99616800000003	90.0	90.0	tetragonal	tetragonal	1	1
1540	SrBiO3	681684	Sr	Bi	-2.088345786	OrthoPerovskite_GdFeO3	-2.2041311	train	-1.977649807929993	-2.1805129395365044	Sr	Bi	5.951269	6.132829	8.510919	90.0	90.0	90.0	orthorhombic	orthorhombic	0	0
1541	SrBiO3	681685	Bi	Sr	-1.944697144	OrthoPerovskite_GdFeO3	-1.9606860000000002	train	-1.8448554277420044	-1.923619259995057			6.059286	6.232843	8.952406	90.0	90.0	90.0	orthorhombic	other	4	4
1542	SrCdO3	682434	Sr	Cd	-1.505780235	OrthoPerovskite_GdFeO3	-1.4575018999999998	train	-1.6314595937728882	-1.3926378808843185	Sr	Cd	5.820061	5.9776419999999995	8.169753	90.0	90.0	90.0	orthorhombic	orthorhombic	1	2
1543	SrCdO3	682435	Cd	Sr	-1.604615429	OrthoPerovskite_GdFeO3	-1.6418355	train	-1.6271725893020632	-1.587154577943004			6.265805	6.309275	7.660055000000001	90.0	90.0	90.0	orthorhombic	other	0	0
1544	SrCeO3	693376	Sr	Ce	-2.805685595	OrthoPerovskite_GdFeO3	-2.8895006000000003	test	-2.873931169509888	-2.9037441432061692	Sr	Ce	6.143475	6.376583999999999	8.842469	90.0	90.0	90.0	orthorhombic	orthorhombic	0	0
1545	SrCoO3	682705	Sr	Co	-1.904164435	OrthoPerovskite_GdFeO3	-1.9955819	test	-1.8584485054016116	-1.9604429058680295	Sr	Co	3.9174045	5.39824	5.402971	90.0	90.0	90.0	tetragonal	tetragonal	0	3
1546	SrCoO3	682706	Co	Sr	-1.77235879	OrthoPerovskite_GdFeO3	-1.8854847	test	-1.725836992263794	-1.844263632532026			5.442778	5.773391999999999	9.139885000000001	90.0	90.0	90.0	orthorhombic	other	5	5
1547	SrCrO3	681713	Sr	Cr	-2.560917138	OrthoPerovskite_GdFeO3	-2.689295	train	-2.524919986724853	-2.69247863304062	Sr	Cr	5.456782	5.457383999999999	7.664167	90.0	90.0	90.0	tetragonal	tetragonal	0	1
1548	SrCuO3	681616	Sr	Cu	-1.546811898	OrthoPerovskite_GdFeO3	-1.6021956	test	-1.5129431486129759	-1.5453248604105705	Sr	Cu	3.8311889999999997	3.83946724	3.83946885	90.11596698	90.0	90.0	cubic	cubic	0	4
1549	SrCuO3	681617	Cu	Sr	-1.40869204	OrthoPerovskite_GdFeO3	-1.6629516	test	-1.3948806524276731	-1.6094371896142396			5.849789	6.266697	7.1733839999999995	90.0	90.0	90.0	orthorhombic	other	4	0
1550	SrDyO3	682860	Sr	Dy	-3.003666927	OrthoPerovskite_GdFeO3	-3.0122259999999996	test	-2.9623079299926762	-3.033249233180031	Sr	Dy	5.974061	6.145148000000001	8.462381	90.0	90.0	90.0	orthorhombic	orthorhombic	0	1
1551	SrDyO3	682861	Dy	Sr	-2.904853105	OrthoPerovskite_GdFeO3	-2.930793	test	-2.842400074005127	-2.9473176494015996			5.8091230000000005	5.823379	9.849613	90.0	90.0	90.0	tetragonal	other	3	3
1552	SrErO3	682108	Sr	Er	-3.035665931	OrthoPerovskite_GdFeO3	-3.040146	train	-3.0032651424407963	-3.0627116110746666	Sr	Er	5.936082	6.101333	8.405793	90.0	90.0	90.0	orthorhombic	orthorhombic	0	1
1553	SrErO3	682109	Er	Sr	-2.886360559	OrthoPerovskite_GdFeO3	-2.9905267	train	-2.9037387371063232	-3.0103512039304237			5.898288	5.93633	9.056944999999999	90.0	90.0	90.0	orthorhombic	other	4	3
1554	SrFeO3	682194	Sr	Fe	-2.188366468	OrthoPerovskite_GdFeO3	-2.239496	train	-2.1326379776000977	-2.217831494264512	Sr	Fe	3.8537114999999997	3.85410042	3.85410042	90.07207015	90.0	90.0	cubic	cubic	0	2
1555	SrFeO3	682195	Fe	Sr	-1.9780364719999999	OrthoPerovskite_GdFeO3	-2.0319426	train	-1.8807069063186648	-1.9988122713377088			5.581707	5.783165	9.063671000000001	90.0	90.0	90.0	orthorhombic	other	4	4
1556	SrGaO3	681837	Ga	Sr	-2.191261574	OrthoPerovskite_GdFeO3	-2.1997042	train	-2.0440146923065186	-2.175841485356642			5.304632	5.9861949999999995	9.063892	90.0	90.0	90.0	orthorhombic	other	3	0
1557	SrGdO3	682502	Sr	Gd	-2.966545666	OrthoPerovskite_GdFeO3	-2.8768651000000003	test	-2.962940216064453	-2.890410623296153	Sr	Gd	6.00511	6.188357	8.537155	90.0	90.0	90.0	orthorhombic	orthorhombic	0	2
1558	SrGdO3	682503	Gd	Sr	-2.8671037189999997	OrthoPerovskite_GdFeO3	-2.9424349999999997	test	-2.8410348892211914	-2.959602785628295			5.868172	5.8817010000000005	9.732460000000001	90.0	90.0	90.0	tetragonal	other	2	1
1559	SrGeO3	681478	Ge	Sr	-2.429145349	OrthoPerovskite_GdFeO3	-2.500105	train	-2.3347296714782715	-2.492837255036107			5.208375	5.2722430000000005	10.53968	90.0	90.0	90.0	orthorhombic	other	3	0
1560	SrHfO3	682230	Sr	Hf	-3.6529439989999997	OrthoPerovskite_GdFeO3	-3.6410370000000003	test	-3.383662223815918	-3.6967974891364546	Sr	Hf	5.7511849999999995	5.791702	8.159324	90.0	90.0	90.0	orthorhombic	orthorhombic	0	1
1561	SrHfO3	682231	Hf	Sr	-3.324966542	OrthoPerovskite_GdFeO3	-3.4077775000000003	test	-3.3970155715942383	-3.4506520902641906			5.786974	5.903192	9.28406	90.0	90.0	90.0	orthorhombic	other	4	3
1562	SrHgO3	693113	Sr	Hg	-1.314345469	OrthoPerovskite_GdFeO3	-1.4011601999999999	train	-1.1672511100769043	-1.3331837098017199	Sr	Hg	5.933634	6.606657000000001	7.655333000000001	90.0	90.0	90.0	orthorhombic	orthorhombic	0	0
1563	SrHoO3	681796	Sr	Ho	-3.020202958	OrthoPerovskite_GdFeO3	-3.0449522	train	-3.023940086364746	-3.0677833188338783	Sr	Ho	5.951785	6.123896	8.438065	90.0	90.0	90.0	orthorhombic	orthorhombic	0	1
1564	SrHoO3	681797	Ho	Sr	-2.910861396	OrthoPerovskite_GdFeO3	-2.9475119999999997	train	-2.8912687301635738	-2.9649602531272587			5.763584	5.805022	9.844925	90.0	90.0	90.0	orthorhombic	other	3	4
1565	SrInO3	681770	Sr	In	-2.012759811	OrthoPerovskite_GdFeO3	-2.058612	train	-2.0868086814880367	-2.026954962635101	Sr	In	5.836041000000001	5.912417	8.242317	90.0	90.0	90.0	orthorhombic	orthorhombic	0	2
1566	SrInO3	681771	In	Sr	-1.91236892	OrthoPerovskite_GdFeO3	-2.1450975	train	-1.728709697723389	-2.1182181604648447			5.8041089999999995	6.217873	8.924657	90.0	90.0	90.0	orthorhombic	other	4	0
1567	SrIrO3	682212	Sr	Ir	-1.837829484	OrthoPerovskite_GdFeO3	-1.8712808999999997	train	-1.720333456993103	-1.8292751753995111	Sr	Ir	5.549999	5.673916	7.890675	90.0	90.0	90.0	orthorhombic	orthorhombic	0	1
1568	SrIrO3	682213	Ir	Sr	-1.609250676	OrthoPerovskite_GdFeO3	-1.6676813000000001	train	-1.3973536491394043	-1.6144281713022146			6.081101	6.257504	8.677430000000001	90.0	90.0	90.0	orthorhombic	other	5	5
1569	SrLaO3	693243	Sr	La	-2.923297083	OrthoPerovskite_GdFeO3	-2.989578	train	-2.87906813621521	-3.0093500951228074	Sr	La	6.108346	6.348215	8.798472	90.0	90.0	90.0	orthorhombic	orthorhombic	0	0
1570	SrLuO3	681972	Sr	Lu	-3.082507686	OrthoPerovskite_GdFeO3	-3.1448232999999997	test	-3.1022956371307373	-3.1731715741688666	Sr	Lu	5.862108	6.030193	8.342883	90.0	90.0	90.0	orthorhombic	orthorhombic	0	0
1571	SrLuO3	681973	Lu	Sr	-2.971829115	OrthoPerovskite_GdFeO3	-3.0215793	test	-2.8906445503234863	-3.0431192352990104			6.173584	6.354998	8.131814	90.0	90.0	90.0	orthorhombic	other	4	4
1572	SrMnO3	682120	Sr	Mn	-2.368317533	OrthoPerovskite_GdFeO3	-2.3544436	test	-2.3301010131835938	-2.3391291170897754	Sr	Mn	5.424858	5.446043	7.703486	90.0	90.0	90.0	tetragonal	tetragonal	0	1
1573	SrMnO3	682121	Mn	Sr	-2.148632385	OrthoPerovskite_GdFeO3	-2.2536213	test	-2.209562063217163	-2.2327371148402673			5.631009	5.696868	9.260591999999999	90.0	90.0	90.0	orthorhombic	other	3	3
1574	SrMoO3	681930	Sr	Mo	-2.6106348969999997	OrthoPerovskite_GdFeO3	-2.5571895000000002	train	-2.5433592796325684	-2.553075260441777	Sr	Mo	5.632118	5.63523	7.968392999999999	90.0	90.0	90.0	tetragonal	tetragonal	0	3
1575	SrMoO3	681931	Mo	Sr	-2.271540424	OrthoPerovskite_GdFeO3	-2.3600037	train	-2.354048252105713	-2.3449963723667078			5.445165	6.243332	8.916424000000001	90.0	90.0	90.0	orthorhombic	other	5	5
1576	SrNbO3	681876	Sr	Nb	-3.021595397	OrthoPerovskite_GdFeO3	-3.0022757	train	-2.9624233245849614	-3.0227492511325753	Sr	Nb	5.709564	5.732254	8.108023	90.0	90.0	90.0	tetragonal	tetragonal	0	2
1577	SrNbO3	681877	Nb	Sr	-2.70344467	OrthoPerovskite_GdFeO3	-2.7117298	train	-2.742616415023804	-2.7161527933411413			5.6718779999999995	6.216755	8.862061	90.0	90.0	90.0	orthorhombic	other	4	4
1578	SrNdO3	693303	Sr	Nd	-2.8650457830000002	OrthoPerovskite_GdFeO3	-2.8959477000000002	test	-2.946598529815674	-2.910547398812348			6.09459	6.302912999999999	8.717295	90.0	90.0	90.0	orthorhombic	other	0	1
1579	SrNiO3	681541	Ni	Sr	-1.476893164	OrthoPerovskite_GdFeO3	-1.5425109	train	-1.5388534069061282	-1.482343012777049			5.400601	5.98537	8.661168	90.0	90.0	90.0	orthorhombic	other	3	3
1580	SrNpO3	693160	Sr	Np	-3.418018997	OrthoPerovskite_GdFeO3	-3.4115483999999996	train	-3.354042291641236	-3.4546313051926596	Sr	Np	6.008399	6.181575	8.618525	90.0	90.0	90.0	orthorhombic	orthorhombic	0	0
1581	SrOsO3	681440	Sr	Os	-1.941014496	OrthoPerovskite_GdFeO3	-1.96785	train	-1.8951951265335083	-1.9311790191367892	Sr	Os	5.587664	5.597802	7.896586999999999	90.0	90.0	90.0	tetragonal	tetragonal	0	1
1582	SrOsO3	681441	Os	Sr	-1.62832891	OrthoPerovskite_GdFeO3	-1.6799671999999999	train	-1.6713705062866209	-1.6273927783428912			5.131469999999999	6.493782	8.718577999999999	90.0	90.0	90.0	orthorhombic	other	5	5
1583	SrPaO3	681978	Sr	Pa	-3.1804392139999997	OrthoPerovskite_GdFeO3	-3.2926402	train	-3.2870326042175293	-3.3291542878871145	Sr	Pa	6.086917	6.267828	8.727162	90.0	90.0	90.0	orthorhombic	orthorhombic	0	0
1584	SrPbO3	682322	Pb	Sr	-1.803955114	OrthoPerovskite_GdFeO3	-1.9647052	train	-1.7608098983764648	-1.92786049170115			6.026175	6.104426	8.985876	90.0	90.0	90.0	orthorhombic	other	4	3
1585	SrPbO3	682323	Sr	Pb	-1.9946223109999999	OrthoPerovskite_GdFeO3	-2.0248678	train	-1.928670644760132	-1.9913466398502822	Sr	Pb	5.8812940000000005	6.040808999999999	8.38917	90.0	90.0	90.0	orthorhombic	orthorhombic	0	0
1586	SrPdO3	682894	Sr	Pd	-1.635982917	OrthoPerovskite_GdFeO3	-1.6294945	train	-1.5144827365875244	-1.5741318270261813	Sr	Pd	5.587587999999999	5.682677	7.92731	90.0	90.0	90.0	orthorhombic	orthorhombic	0	2
1587	SrPdO3	682895	Pd	Sr	-1.3012975	OrthoPerovskite_GdFeO3	-1.3953269	train	-1.2528929710388184	-1.3270281622024085			5.927919999999999	5.99935	8.263502	90.0	90.0	90.0	orthorhombic	other	5	5
1588	SrPmO3	693202	Sr	Pm	-2.896623645	OrthoPerovskite_GdFeO3	-2.927754	test	-2.8361644744873047	-2.944110766650103			6.065794	6.265812	8.669884	90.0	90.0	90.0	orthorhombic	other	0	1
1589	SrPrO3	693312	Sr	Pr	-2.838007083	OrthoPerovskite_GdFeO3	-2.8785832	train	-2.838074207305908	-2.892223635884289	Sr	Pr	6.110169	6.341583999999999	8.771169	90.0	90.0	90.0	orthorhombic	orthorhombic	0	0
1590	SrPtO3	681612	Sr	Pt	-1.7075307000000002	OrthoPerovskite_GdFeO3	-1.779737	train	-1.6398986577987669	-1.7326741375861632	Sr	Pt	5.594663	5.718744	7.941917999999999	90.0	90.0	90.0	orthorhombic	orthorhombic	0	0
1591	SrPtO3	681613	Pt	Sr	-1.3503033359999999	OrthoPerovskite_GdFeO3	-1.4411948	train	-1.333538293838501	-1.3754299316520266			5.493537	5.8177	9.113561	90.0	90.0	90.0	orthorhombic	other	5	5
1592	SrPuO3	681376	Sr	Pu	-3.329578691	OrthoPerovskite_GdFeO3	-3.3930742999999994	train	-3.3280839920043945	-3.435136644896697	Sr	Pu	5.978896	6.146523999999999	8.57023	90.0	90.0	90.0	orthorhombic	orthorhombic	0	1
1593	SrPuO3	681377	Pu	Sr	-3.0933255660000003	OrthoPerovskite_GdFeO3	-3.1448631000000002	train	-3.1374168395996094	-3.1732135728307655			5.726948	5.8620980000000005	9.888521	90.0	90.0	90.0	orthorhombic	other	4	3
1594	SrReO3	682412	Re	Sr	-1.903506154	OrthoPerovskite_GdFeO3	-1.8946561999999998	train	-1.9703774452209477	-1.8539417915170062			5.142087999999999	6.508915	8.766836	90.0	90.0	90.0	orthorhombic	other	4	4
1595	SrReO3	682413	Sr	Re	-2.231955676	OrthoPerovskite_GdFeO3	-2.3018026000000003	train	-2.30778169631958	-2.2835800828938053	Sr	Re	5.6034239999999995	5.613108	7.910953	90.0	90.0	90.0	tetragonal	tetragonal	1	1
1596	SrRhO3	682394	Sr	Rh	-1.8559463109999998	OrthoPerovskite_GdFeO3	-1.8840605	train	-1.6922986507415771	-1.8427607557914267	Sr	Rh	5.552575	5.634518	7.881963000000001	90.0	90.0	90.0	orthorhombic	orthorhombic	0	1
1597	SrRhO3	682395	Rh	Sr	-1.5414437730000001	OrthoPerovskite_GdFeO3	-1.6392052	train	-1.4331492185592651	-1.5843789729080375			5.7506	5.859042	8.830786	90.0	90.0	90.0	orthorhombic	other	5	5
1598	SrRuO3	681694	Ru	Sr	-1.7059459680000002	OrthoPerovskite_GdFeO3	-1.7550586	train	-1.8216960430145264	-1.7066324346264583			5.359454	6.142688	8.986286	90.0	90.0	90.0	orthorhombic	other	5	5
1599	SrRuO3	681695	Sr	Ru	-2.023900416	OrthoPerovskite_GdFeO3	-2.0124946	train	-1.950469136238098	-1.9782899101165468	Sr	Ru	5.57354	5.58638	7.896405000000001	90.0	90.0	90.0	tetragonal	tetragonal	0	3
1600	SrSbO3	682661	Sb	Sr	-2.133730762	OrthoPerovskite_GdFeO3	-2.1989856	train	-2.0590651035308842	-2.1750831879083936			5.938777	6.154563	9.010524	90.0	90.0	90.0	orthorhombic	other	3	2
1601	SrSbO3	682662	Sr	Sb	-2.267772546	OrthoPerovskite_GdFeO3	-2.3588636000000003	train	-2.214452743530273	-2.343793290094585	Sr	Sb	5.825221	5.922587999999999	8.294653	90.0	90.0	90.0	orthorhombic	orthorhombic	0	0
1602	SrScO3	682324	Sc	Sr	-2.9203343310000003	OrthoPerovskite_GdFeO3	-2.8845603	train	-2.8066413402557373	-2.898530927392671			5.91814	6.204015	8.304777	90.0	90.0	90.0	orthorhombic	other	3	3
1603	SrScO3	682325	Sr	Sc	-3.049723099	OrthoPerovskite_GdFeO3	-2.9796142999999997	train	-3.06174898147583	-2.9988359728223495	Sr	Sc	5.742769	5.8125029999999995	8.148003	90.0	90.0	90.0	orthorhombic	orthorhombic	0	0
1604	SrSiO3	693114	Sr	Si	-2.9561405560000003	OrthoPerovskite_GdFeO3	-2.8722877999999996	test	-3.063287734985352	-2.8855804606049946	Sr	Si	3.6657040000000003	3.66752073	3.66752073	89.98388277	90.0	90.0	cubic	cubic	1	1
1605	SrSmO3	682645	Sr	Sm	-2.911919686	OrthoPerovskite_GdFeO3	-2.9455407000000005	train	-2.9670286178588867	-2.9628800530719697	Sr	Sm	6.051157	6.245811	8.626636999999999	90.0	90.0	90.0	orthorhombic	orthorhombic	0	1
1606	SrSmO3	682646	Sm	Sr	-2.830065036	OrthoPerovskite_GdFeO3	-2.87351	train	-2.780995607376098	-2.8868701783078183			5.9488959999999995	5.958531	9.652393	90.0	90.0	90.0	tetragonal	other	2	2
1607	SrSnO3	682160	Sr	Sn	-2.4951500909999997	OrthoPerovskite_GdFeO3	-2.4807042999999998	train	-2.4212357997894287	-2.472364806797552	Sr	Sn	5.7332790000000005	5.766111	8.130636	90.0	90.0	90.0	orthorhombic	orthorhombic	0	3
1608	SrSnO3	682161	Sn	Sr	-2.222575986	OrthoPerovskite_GdFeO3	-2.270281	train	-2.1538136005401607	-2.250317142670183			5.743022	5.797609	9.72982	90.0	90.0	90.0	orthorhombic	other	4	4
1609	SrTaO3	681398	Sr	Ta	-3.121305983	OrthoPerovskite_GdFeO3	-3.1014538	train	-3.002129077911377	-3.127406223234004	Sr	Ta	5.691317	5.703085	8.078194	90.0	90.0	90.0	tetragonal	tetragonal	0	0
1610	SrTaO3	681399	Ta	Sr	-2.8005160989999998	OrthoPerovskite_GdFeO3	-2.8171816	train	-2.787334680557251	-2.8274300419539444			5.577086	6.313983	8.88893	90.0	90.0	90.0	orthorhombic	other	4	4
1611	SrTbO3	682556	Sr	Tb	-2.854187698	OrthoPerovskite_GdFeO3	-2.9087099999999997	train	-2.837321758270264	-2.9240147235044924	Sr	Tb	5.979215	6.16714	8.507261999999999	90.0	90.0	90.0	orthorhombic	orthorhombic	0	0
1612	SrTbO3	682557	Tb	Sr	-2.746598089	OrthoPerovskite_GdFeO3	-2.8843231	train	-2.719110012054444	-2.898280623809698			5.845403	5.856816	9.725128999999999	90.0	90.0	90.0	tetragonal	other	3	1
1613	SrTcO3	681656	Sr	Tc	-2.294644754	OrthoPerovskite_GdFeO3	-2.410177	test	-2.2045269012451167	-2.397941384000694	Sr	Tc	5.587422	5.595892	7.918324	90.0	90.0	90.0	tetragonal	tetragonal	0	0
1614	SrTcO3	681657	Tc	Sr	-1.981901128	OrthoPerovskite_GdFeO3	-2.0546922999999997	test	-2.058715343475342	-2.0228187275837537			5.287408	6.230074	9.029221000000001	90.0	90.0	90.0	orthorhombic	other	5	5
1615	SrTeO3	681807	Te	Sr	-2.199770817	OrthoPerovskite_GdFeO3	-2.2063822999999996	test	-1.9322631359100344	-2.1828885020406728			5.95584	6.606014999999999	8.664273	90.0	90.0	90.0	orthorhombic	other	0	0
1616	SrThO3	693122	Sr	Th	-3.64884939	OrthoPerovskite_GdFeO3	-3.5589513999999998	test	-3.320580005645752	-3.6101772539320183	Sr	Th	6.145042	6.330722	8.831195	90.0	90.0	90.0	orthorhombic	orthorhombic	0	0
1617	SrTiO3	682058	Sr	Ti	-3.3535247810000004	OrthoPerovskite_GdFeO3	-3.0443687	test	-3.134538173675537	-3.067167584682678	Sr	Ti	5.533099	5.548133	7.828269000000001	90.0	90.0	90.0	tetragonal	tetragonal	1	2
1618	SrTiO3	682059	Ti	Sr	-3.182124895	OrthoPerovskite_GdFeO3	-2.9645963	test	-3.0003252029418945	-2.9829883370336097			5.607275	5.726053	9.511869	90.0	90.0	90.0	orthorhombic	other	4	4
1619	SrTlO3	682446	Sr	Tl	-1.579617623	OrthoPerovskite_GdFeO3	-1.7423182000000002	train	-1.5928049087524414	-1.693188219750785	Sr	Tl	5.874009	6.13088	8.338142999999999	90.0	90.0	90.0	orthorhombic	orthorhombic	0	0
1620	SrTlO3	682447	Tl	Sr	-1.483183179	OrthoPerovskite_GdFeO3	-1.561293	train	-1.1309685707092283	-1.5021626878434826			5.88433	6.217279	9.223991	90.0	90.0	90.0	orthorhombic	other	2	3
1621	SrTmO3	681852	Sr	Tm	-3.059114637	OrthoPerovskite_GdFeO3	-3.0229576000000002	test	-3.111659049987793	-3.044573676396868	Sr	Tm	5.911868	6.079079	8.370312	90.0	90.0	90.0	orthorhombic	orthorhombic	0	1
1622	SrTmO3	681853	Tm	Sr	-2.964312943	OrthoPerovskite_GdFeO3	-2.9135953999999997	test	-2.7903048992156982	-2.929170006490397			6.215514	6.3612720000000005	8.184078999999999	90.0	90.0	90.0	orthorhombic	other	3	4
1623	SrUO3	681862	Sr	U	-3.486784095	OrthoPerovskite_GdFeO3	-3.3143977999999996	test	-3.630148887634277	-3.352113837789704	Sr	U	6.025537	6.228407	8.664053	90.0	90.0	90.0	orthorhombic	orthorhombic	0	2
1624	SrUO3	681863	U	Sr	-3.325613759	OrthoPerovskite_GdFeO3	-3.3167492999999997	test	-3.3273849487304688	-3.3545952411428286			5.808845	5.966712	9.651231	90.0	90.0	90.0	orthorhombic	other	1	1
1625	SrVO3	682944	Sr	V	-2.8817458539999996	OrthoPerovskite_GdFeO3	-2.8456473	test	-2.8494379520416264	-2.857468265823404	Sr	V	5.4371160000000005	5.4413	7.904336	90.0	90.0	90.0	tetragonal	tetragonal	0	2
1626	SrVO3	682945	V	Sr	-2.723350597	OrthoPerovskite_GdFeO3	-2.7302842000000003	test	-2.641073226928711	-2.7357321896308338			5.531542	5.6391599999999995	9.552609	90.0	90.0	90.0	orthorhombic	other	4	5
1627	SrWO3	682172	Sr	W	-2.595738644	OrthoPerovskite_GdFeO3	-2.5945110000000002	train	-2.6114306449890137	-2.5924585031564837	Sr	W	3.9936805	5.637039	5.64814	90.0	90.0	90.0	tetragonal	tetragonal	1	0
1628	SrYO3	682592	Y	Sr	-2.8816355789999997	OrthoPerovskite_GdFeO3	-2.9470827999999996	test	-2.7978625297546387	-2.9645073429341218			5.811751	5.852983999999999	9.785630000000001	90.0	90.0	90.0	orthorhombic	other	2	2
1629	SrYO3	682593	Sr	Y	-2.979341817	OrthoPerovskite_GdFeO3	-2.9651822999999995	test	-2.9041020870208736	-2.983606709291713	Sr	Y	6.006659	6.187889	8.422864	90.0	90.0	90.0	orthorhombic	orthorhombic	0	1
1630	SrYbO3	693546	Sr	Yb	-2.491391562	OrthoPerovskite_GdFeO3	-2.4970038	test	-2.531339168548584	-2.489564736184859			6.401426	6.585952000000001	7.076932000000001	90.0	90.0	90.0	orthorhombic	other	0	1
1631	SrZnO3	682778	Zn	Sr	-1.7641543240000002	OrthoPerovskite_GdFeO3	-1.7832278000000001	test	-1.5999830961227417	-1.7363577790172018			5.97423	6.230019	7.584907	90.0	90.0	90.0	orthorhombic	other	0	3
1632	SrZrO3	681448	Sr	Zr	-3.5015318260000003	OrthoPerovskite_GdFeO3	-3.4626536	train	-3.3997929096221924	-3.508559697555873	Sr	Zr	5.797484	5.862972	8.234361	90.0	90.0	90.0	orthorhombic	orthorhombic	0	0
1633	SrZrO3	681449	Zr	Sr	-3.22924128	OrthoPerovskite_GdFeO3	-3.3121943	train	-3.1952857971191406	-3.3497886103652474			5.869545	5.965788	9.122776	90.0	90.0	90.0	orthorhombic	other	4	2
1634	TaAgO3	682192	Ag	Ta	-2.245163225	OrthoPerovskite_GdFeO3	-2.289791	test	-2.0136959552764893	-2.2709049289425445	Ag	Ta	5.49925	5.588939	7.854864999999999	90.0	90.0	90.0	orthorhombic	orthorhombic	1	0
1635	TaAgO3	682193	Ta	Ag	-2.019384336	OrthoPerovskite_GdFeO3	-2.1552644	test	-1.7627462148666382	-2.1289467080943925			5.492281	5.916883	8.712987	90.0	90.0	90.0	orthorhombic	other	4	3
1636	TaAuO3	693094	Au	Ta	-1.926829675	OrthoPerovskite_GdFeO3	-1.9813449	train	-1.858255743980408	-1.9454194146758406			5.492959	5.643539	7.894375	90.0	90.0	90.0	orthorhombic	other	1	1
1637	TaBiO3	693536	Bi	Ta	-1.977942233	OrthoPerovskite_GdFeO3	-2.0005667000000003	train	-2.249281644821167	-1.9657030799844044	Bi	Ta	4.0897495	5.637626999999999	5.731589	90.0	90.0	90.0	orthorhombic	orthorhombic	0	3
1638	TaCdO3	682344	Ta	Cd	-2.001006314	OrthoPerovskite_GdFeO3	-2.0277032999999998	train	-1.9463169574737549	-1.9943387806998603			5.62153	6.377888	7.121328	90.0	90.0	90.0	orthorhombic	other	4	4
1639	TaCdO3	682345	Cd	Ta	-2.239353319	OrthoPerovskite_GdFeO3	-2.1093576	train	-2.3264834880828857	-2.0805038897013612	Cd	Ta	5.590205999999999	5.598318	7.895635	90.0	90.0	90.0	tetragonal	tetragonal	3	3
1640	TaCrO3	681465	Cr	Ta	-2.526920889	OrthoPerovskite_GdFeO3	-2.522795	train	-2.4760446548461914	-2.5167807132893043	Cr	Ta	5.397737	5.501044	7.732161	90.0	90.0	90.0	orthorhombic	orthorhombic	0	1
1641	TaCrO3	681466	Ta	Cr	-2.329811259	OrthoPerovskite_GdFeO3	-2.3748492999999997	train	-2.2424652576446533	-2.3606620843034047			5.224572	6.037825	6.764583999999999	90.0	90.0	90.0	orthorhombic	other	4	4
1642	TaCuO3	681642	Cu	Ta	-2.319600884	OrthoPerovskite_GdFeO3	-2.4056985	train	-2.2075653076171875	-2.39321547929435			5.2332410000000005	5.456416	7.643184	90.0	90.0	90.0	orthorhombic	other	0	0
1643	TaCuO3	681643	Ta	Cu	-2.180514363	OrthoPerovskite_GdFeO3	-2.1439342	train	-2.0698809623718257	-2.1169905965606604			4.832466999999999	5.157415	8.88199	90.0	90.0	90.0	orthorhombic	other	1	1
1644	TaFeO3	693511	Fe	Ta	-2.2875883359999998	OrthoPerovskite_GdFeO3	-2.3786666000000003	test	-2.3538713455200195	-2.3646902624959982			5.177632	5.767051	7.4315880000000005	90.0	90.0	90.0	orthorhombic	other	0	0
1645	TaGaO3	681698	Ga	Ta	-2.389839373	OrthoPerovskite_GdFeO3	-2.381106	train	-2.2753262519836426	-2.367264421687838	Ga	Ta	3.98309115	3.98309157	3.9832160000000005	90.0	90.0	90.20278023	cubic	cubic	3	0
1646	TaGaO3	681699	Ta	Ga	-2.108824835	OrthoPerovskite_GdFeO3	-2.1621962000000003	train	-2.013831615447998	-2.136261439866958	Ga	Ta	6.130098	6.729417999999999	6.396486	90.0	90.0	90.0	orthorhombic	orthorhombic	4	4
1647	TaGeO3	693322	Ge	Ta	-2.074765901	OrthoPerovskite_GdFeO3	-2.1769276	train	-2.1728136539459233	-2.1518066430803184			5.341044	5.855298	7.741598	90.0	90.0	90.0	orthorhombic	other	2	0
1648	TaHgO3	681822	Hg	Ta	-2.080367034	OrthoPerovskite_GdFeO3	-2.096549	test	-1.9483108520507808	-2.066987707269369	Hg	Ta	4.01433618	4.01433618	4.0164155	90.0	90.0	90.91041353	cubic	cubic	1	2
1649	TaHgO3	681823	Ta	Hg	-1.90303222	OrthoPerovskite_GdFeO3	-2.0399356	test	-1.998603105545044	-2.0072468267285335			5.516667	6.316952	9.480153999999999	90.0	90.0	90.0	orthorhombic	other	4	4
1650	TaMnO3	693167	Mn	Ta	-2.490166847	OrthoPerovskite_GdFeO3	-2.4487956000000004	test	-2.60408353805542	-2.4386933821010435	Mn	Ta	5.262142	5.58988	7.602282000000001	90.0	90.0	90.041731	orthorhombic	orthorhombic	0	1
1651	TaPdO3	693268	Pd	Ta	-1.981555849	OrthoPerovskite_GdFeO3	-2.0569613	train	-2.11755919456482	-2.025213073409074	Pd	Ta	5.415712999999999	5.577344999999999	7.755425	90.0	90.0	90.0	orthorhombic	orthorhombic	0	0
1652	TaSnO3	693089	Sn	Ta	-2.220518544	OrthoPerovskite_GdFeO3	-2.4464509999999997	test	-2.1378755569458012	-2.436219259922971	Sn	Ta	5.605654	5.8356069999999995	8.095326	90.0	90.0	90.0	orthorhombic	orthorhombic	2	0
1653	TaTlO3	681438	Tl	Ta	-2.4166274480000003	OrthoPerovskite_GdFeO3	-2.449842	train	-2.205955982208252	-2.439797588126435	Tl	Ta	4.0407585	4.04519928	4.04519928	90.42144841	90.0	90.0	cubic	cubic	3	2
1654	TaTlO3	681439	Ta	Tl	-2.273676016	OrthoPerovskite_GdFeO3	-2.3451134999999996	train	-2.0571131706237797	-2.329283596602857			5.884457	6.33291	9.830835	90.0	90.0	90.0	orthorhombic	other	4	4
1655	TaZnO3	693173	Zn	Ta	-2.235976488	OrthoPerovskite_GdFeO3	-2.3189094	train	-2.173999309539795	-2.301631909762284			5.2802050000000005	5.488764	7.571281	90.0	90.0	90.0	orthorhombic	other	1	0
1656	TbAlO3	681926	Tb	Al	-3.4479601960000004	OrthoPerovskite_GdFeO3	-3.4713928999999997	train	-3.657390117645264	-3.517781780619432	Tb	Al	5.1976309999999994	5.335519000000001	7.404122	90.0	90.0	90.0	orthorhombic	orthorhombic	0	0
1657	TbAlO3	681927	Al	Tb	-3.1923825860000004	OrthoPerovskite_GdFeO3	-2.9900700000000002	train	-3.316985607147217	-3.009869274561352			5.380782	5.392992	8.392823	90.0	90.0	90.0	tetragonal	other	5	5
1658	TbBeO3	693153	Tb	Be	-2.616394204	OrthoPerovskite_GdFeO3	-2.6824939999999997	train	-2.68985366821289	-2.6853019270212277	Tb	Be	4.968047	5.257321	7.105844	90.0	90.0	90.0	orthorhombic	orthorhombic	1	2
1659	TbCoO3	682958	Tb	Co	-2.397965012	OrthoPerovskite_GdFeO3	-2.409248	train	-2.4375312328338623	-2.3969610634754743	Tb	Co	5.199571	5.5511550000000005	7.512142999999999	90.0	90.0	90.0	orthorhombic	orthorhombic	0	0
1660	TbCrO3	682234	Cr	Tb	-2.7239842110000003	OrthoPerovskite_GdFeO3	-2.4451737000000002	test	-2.7028870582580566	-2.4348713983440025			5.492376	5.623133999999999	8.135475	90.0	90.0	90.0	orthorhombic	other	3	3
1661	TbCrO3	682235	Tb	Cr	-3.064121688	OrthoPerovskite_GdFeO3	-3.1152433999999998	test	-2.9924428462982178	-3.141957598814801	Tb	Cr	5.286058000000001	5.578117	7.6028199999999995	90.0	90.0	90.0	orthorhombic	orthorhombic	0	0
1662	TbCuO3	682886	Tb	Cu	-2.142313424	OrthoPerovskite_GdFeO3	-2.1910896	train	-2.306046962738037	-2.1667509910654124	Tb	Cu	5.230161	5.85762	7.2277070000000005	90.0	90.0	90.0	orthorhombic	orthorhombic	0	0
1663	TbCuO3	682887	Cu	Tb	-1.8605428380000002	OrthoPerovskite_GdFeO3	-1.8722119	train	-1.923603653907776	-1.830257606410253			5.522531	5.591757	8.047417	90.0	90.0	90.0	orthorhombic	other	5	5
1664	TbFeO3	693084	Tb	Fe	-2.64359001	OrthoPerovskite_GdFeO3	-2.690634	test	-2.709113597869873	-2.6938916030979594	Tb	Fe	5.301176	5.60683	7.629092999999999	90.0	90.0	90.0	orthorhombic	orthorhombic	0	0
1665	TbGaO3	682224	Tb	Ga	-2.832547949	OrthoPerovskite_GdFeO3	-2.880806	test	-2.9854955673217773	-2.8945692294940386	Tb	Ga	5.284528	5.562244000000001	7.586219	90.0	90.0	90.0	orthorhombic	orthorhombic	0	0
1666	TbHfO3	693456	Tb	Hf	-3.307852065	OrthoPerovskite_GdFeO3	-3.2669437	train	-3.2884435653686523	-3.3020382422721615	Tb	Hf	5.473525	6.063606	7.538367999999999	90.0	90.0	90.0	orthorhombic	orthorhombic	0	2
1667	TbMgO3	693436	Tb	Mg	-2.78750701	OrthoPerovskite_GdFeO3	-2.932385	test	-2.8792390823364262	-2.9489975958775405	Tb	Mg	5.370914	5.728464	7.47726	90.0	90.0	90.0	orthorhombic	orthorhombic	0	0
1668	TbMnO3	681666	Mn	Tb	-2.552495429	OrthoPerovskite_GdFeO3	-2.4431293	train	-2.6272528171539307	-2.4327140600428634			5.646	5.656268	7.9443410000000005	90.0	90.0	90.0	tetragonal	other	3	5
1669	TbMnO3	681667	Tb	Mn	-2.822191231	OrthoPerovskite_GdFeO3	-2.7314491000000003	train	-2.906527280807495	-2.7369614419234365	Tb	Mn	5.30145	5.731148999999999	7.5083470000000005	90.0	90.0	90.0	orthorhombic	orthorhombic	0	0
1670	TbNiO3	682892	Ni	Tb	-1.9823368680000002	OrthoPerovskite_GdFeO3	-2.0906985000000002	test	-1.8754552602767944	-2.060814009494564			5.6570290000000005	5.665792	7.791726	90.0	90.0	90.0	tetragonal	other	4	5
1671	TbNiO3	682893	Tb	Ni	-2.2690432819999997	OrthoPerovskite_GdFeO3	-2.368183	test	-2.38490891456604	-2.3536275194839567	Tb	Ni	5.191358	5.512362	7.429649	90.0	90.0	90.0	orthorhombic	orthorhombic	0	0
1672	TbPbO3	693459	Pb	Tb	-2.2733997980000002	OrthoPerovskite_GdFeO3	-2.4107222999999998	test	-2.2477753162384038	-2.3985168078784134			5.822455000000001	6.067615	8.50264	90.0	90.0	90.0	orthorhombic	other	0	0
1673	TbPdO3	693405	Tb	Pd	-2.0697111440000002	OrthoPerovskite_GdFeO3	-1.9555504000000001	test	-2.171180963516236	-1.9181999552702833	Tb	Pd	5.400304	5.895379	7.542967	90.0	90.0	90.0	orthorhombic	orthorhombic	0	1
1674	TbScO3	693440	Tb	Sc	-3.6652383189999997	OrthoPerovskite_GdFeO3	-3.5035480000000003	train	-3.656279802322388	-3.551713217132319	Tb	Sc	5.439303	5.727888	7.896002	90.0	90.0	90.0	orthorhombic	orthorhombic	0	2
1675	TbTiO3	681956	Tb	Ti	-3.326157895	OrthoPerovskite_GdFeO3	-3.2671087000000005	test	-3.3961329460144043	-3.3022123573277713	Tb	Ti	5.318074	5.678355000000001	7.652196000000001	90.0	90.0	90.0	orthorhombic	orthorhombic	0	0
1676	TbTiO3	681957	Ti	Tb	-3.086506944	OrthoPerovskite_GdFeO3	-3.0415392000000003	test	-3.1275129318237305	-3.064181775289667			5.624294	5.632719	8.03951	90.0	90.0	90.0	tetragonal	other	3	5
1677	TbTlO3	682596	Tl	Tb	-2.148146381	OrthoPerovskite_GdFeO3	-2.2826984	test	-2.07507848739624	-2.263420514133967			5.801456	5.882822	8.483728	90.0	90.0	90.0	orthorhombic	other	0	0
1678	TbTlO3	682597	Tb	Tl	-2.147370044	OrthoPerovskite_GdFeO3	-2.036931	test	-2.1360731124877934	-2.004076244328024			5.5843110000000005	5.948714	8.521998	90.0	90.0	90.0	orthorhombic	other	1	3
1679	TbVO3	693248	Tb	V	-3.13237441	OrthoPerovskite_GdFeO3	-3.3027550000000003	test	-3.1013460159301762	-3.3398278573688	Tb	V	5.3178410000000005	5.6695660000000005	7.63788	90.0	90.0	90.0	orthorhombic	orthorhombic	0	0
1680	TcAgO3	681946	Ag	Tc	-1.140795298	OrthoPerovskite_GdFeO3	-1.1361852	train	-1.0866663455963137	-1.0535707591344237	Ag	Tc	5.384761	5.467294	7.683658	90.0	90.0	90.0	orthorhombic	orthorhombic	1	0
1681	TcAuO3	693283	Au	Tc	-0.8689402559999999	OrthoPerovskite_GdFeO3	-0.90377295	train	-0.8225940465927124	-0.808319414691645	Au	Tc	3.7492550000000002	5.511527	5.555794000000001	90.0	90.0	90.0	orthorhombic	orthorhombic	0	2
1682	TcBiO3	693188	Bi	Tc	-1.30263567	OrthoPerovskite_GdFeO3	-1.3188971999999999	train	-1.2435128688812256	-1.2463762745314348	Bi	Tc	5.426722	5.883675	7.853733	90.0	90.0	90.0	orthorhombic	orthorhombic	0	0
1683	TcHgO3	681834	Hg	Tc	-1.0274068809999999	OrthoPerovskite_GdFeO3	-1.1280627	train	-1.0668311119079592	-1.0449995498060152			5.526852	5.541767	7.76887	90.0	90.0	90.0	tetragonal	other	1	1
1684	TcHgO3	681835	Tc	Hg	-1.045153085	OrthoPerovskite_GdFeO3	-1.1907849	train	-0.9034268856048584	-1.1111866973268916			5.579122	6.219771	9.891225	90.0	90.0	90.0	orthorhombic	other	0	0
1685	TcPbO3	681932	Pb	Tc	-1.4328306469999998	OrthoPerovskite_GdFeO3	-1.4372747	test	-1.2904448509216309	-1.371293274503575	Pb	Tc	3.98703743	3.98703743	4.0076285	90.0	90.0	89.88357981	tetragonal	tetragonal	1	2
1686	TcPbO3	681933	Tc	Pb	-1.132970147	OrthoPerovskite_GdFeO3	-1.1725833	test	-1.2683043479919434	-1.0919795906833751			6.05007	6.054191	8.939124000000001	90.0	90.0	90.0	tetragonal	other	5	5
1687	TcPdO3	693261	Pd	Tc	-0.9921387359999999	OrthoPerovskite_GdFeO3	-1.0347757	train	-1.171173095703125	-0.9465591183354986			5.2180919999999995	5.541076	7.5021	90.0	90.0	90.0	orthorhombic	other	0	0
1688	TcSnO3	693085	Sn	Tc	-1.404213168	OrthoPerovskite_GdFeO3	-1.4960268	test	-1.309338092803955	-1.4332910027379373	Sn	Tc	5.541103	5.647848000000001	7.900039	90.0	90.0	90.0	orthorhombic	orthorhombic	0	0
1689	TeAuO3	693394	Au	Te	-0.567508964	OrthoPerovskite_GdFeO3	-0.6554729	train	-0.7085956335067749	-0.546302584306374			5.690665	5.772781	8.096368	90.0	90.0	90.0	orthorhombic	other	0	2
1690	TePbO3	682218	Pb	Te	-1.193892295	OrthoPerovskite_GdFeO3	-1.2282007	train	-1.140774488449097	-1.1506694494339864			5.99942	6.059589	8.491499000000001	90.0	90.0	90.0	orthorhombic	other	3	4
1691	TePbO3	682219	Te	Pb	-1.353185528	OrthoPerovskite_GdFeO3	-1.3783264	train	-1.157752513885498	-1.3090885076394523			6.240398	6.603999000000001	8.068617	90.0	90.0	90.0	orthorhombic	other	0	0
1692	ThAlO3	693259	Th	Al	-3.236080685	OrthoPerovskite_GdFeO3	-3.1831713	train	-3.33872127532959	-3.213638023578017	Th	Al	3.79998533	3.79998533	3.8094370000000004	90.0	90.0	90.16087417	cubic	cubic	2	2
1693	ThBeO3	693232	Th	Be	-3.3594527480000003	OrthoPerovskite_GdFeO3	-3.3327517999999996	train	-2.8998899459838867	-3.371481763430038	Th	Be	5.181687	5.190565190000001	5.19056519	60.38388692	60.05656507	60.05656507	rhombohedral	rhombohedral	0	1
1694	ThCoO3	693523	Th	Co	-2.9465396630000003	OrthoPerovskite_GdFeO3	-2.9158456000000004	test	-2.73280930519104	-2.9315445137518057	Th	Co	5.408643	5.932837	7.726536	90.0	90.0	90.0	orthorhombic	orthorhombic	0	0
1695	ThCrO3	693551	Th	Cr	-3.281829671	OrthoPerovskite_GdFeO3	-3.2411761	train	-2.9831969738006587	-3.274847168896882	Th	Cr	5.485652	6.3288519999999995	7.587894	90.0	90.0	90.0	orthorhombic	orthorhombic	0	0
1696	ThCuO3	693435	Th	Cu	-2.74472601	OrthoPerovskite_GdFeO3	-2.7459447	train	-2.6938271522521973	-2.752257818893689	Th	Cu	5.327972	6.293326	7.458405	90.0	90.0	90.0	orthorhombic	orthorhombic	0	0
1697	ThNiO3	693310	Th	Ni	-2.942327012	OrthoPerovskite_GdFeO3	-2.9583017999999996	train	-2.73553729057312	-2.9763461114728007	Th	Ni	5.38005	5.846407	7.711365	90.0	90.0	90.0	orthorhombic	orthorhombic	0	0
1698	ThPbO3	693393	Pb	Th	-2.897725629	OrthoPerovskite_GdFeO3	-2.7539651000000003	test	-2.4537794589996342	-2.760721287936173	Pb	Th	6.109156	6.403707	8.863182	90.0	90.0	90.0	orthorhombic	orthorhombic	0	1
1699	ThScO3	693576	Th	Sc	-3.586436136	OrthoPerovskite_GdFeO3	-3.4432370000000003	train	-3.6432313919067374	-3.4880704709574144	Th	Sc	5.6550970000000005	6.089601999999999	7.847078999999999	90.0	90.0	90.0	orthorhombic	orthorhombic	0	0
1700	ThTiO3	693491	Th	Ti	-3.354907833	OrthoPerovskite_GdFeO3	-3.140904	train	-3.2851850986480717	-3.1690357612146247	Th	Ti	5.502057	5.981722	7.669489	90.0	90.0	90.0	orthorhombic	orthorhombic	0	2
1701	ThTlO3	693334	Tl	Th	-2.610597373	OrthoPerovskite_GdFeO3	-2.6100263999999997	test	-2.2740535736083984	-2.608831016694679			6.024213	6.301965	8.853611	90.0	90.0	90.0	orthorhombic	other	0	1
1702	TiAgO3	681672	Ag	Ti	-1.9148095619999999	OrthoPerovskite_GdFeO3	-1.8847935000000002	train	-2.008672952651977	-1.8435342487354374			5.409867	5.418321	7.512092999999999	90.0	90.0	90.0	tetragonal	other	0	4
1703	TiAgO3	681673	Ti	Ag	-1.8876258430000001	OrthoPerovskite_GdFeO3	-1.9414356	train	-1.832288146018982	-1.9033054147435209			5.1718	5.4828220000000005	8.79753	90.0	90.0	90.0	orthorhombic	other	1	0
1704	TiAuO3	693507	Au	Ti	-1.7625512230000002	OrthoPerovskite_GdFeO3	-1.8267480999999999	train	-1.7391844987869265	-1.7822822605604638			3.7123144999999997	5.487603	5.516801	90.0	90.0	90.0	orthorhombic	other	0	0
1705	TiBiO3	682186	Bi	Ti	-2.2417913019999998	OrthoPerovskite_GdFeO3	-2.1306912999999996	train	-2.2157087326049805	-2.103016122197449	Bi	Ti	5.475085	5.710589	7.867012	90.0	90.0	90.0	orthorhombic	orthorhombic	1	4
1706	TiBiO3	682187	Ti	Bi	-2.181900405	OrthoPerovskite_GdFeO3	-2.1949387000000002	train	-2.300942897796631	-2.1708127259778136			5.186071	6.165873	9.329153	90.0	90.0	90.0	orthorhombic	other	4	1
1707	TiCdO3	681634	Ti	Cd	-2.313044479	OrthoPerovskite_GdFeO3	-2.3334806	train	-2.195544958114624	-2.31700806308529			5.395141000000001	5.505521	8.436227	90.0	90.0	90.0	orthorhombic	other	3	2
1708	TiCdO3	681635	Cd	Ti	-2.435282146	OrthoPerovskite_GdFeO3	-2.4060544999999998	train	-2.3081591129302983	-2.3935911457173615	Cd	Ti	5.298893	5.449461	7.6095880000000005	90.0	90.0	90.0	orthorhombic	orthorhombic	0	0
1709	TiCrO3	682954	Cr	Ti	-2.742734423	OrthoPerovskite_GdFeO3	-2.5788033	test	-2.697033405303955	-2.575883066435296	Cr	Ti	5.067372	5.349787	7.510663	90.0	90.0	90.0	orthorhombic	orthorhombic	0	4
1710	TiCrO3	682955	Ti	Cr	-2.646633913	OrthoPerovskite_GdFeO3	-2.5805345	test	-2.806434869766236	-2.5777099027036052			4.89379	5.312539	7.391622999999999	90.0	90.0	90.0	orthorhombic	other	2	3
1711	TiCuO3	693537	Cu	Ti	-2.142311549	OrthoPerovskite_GdFeO3	-2.2457561000000004	train	-2.0924639701843257	-2.2244374194743335	Cu	Ti	4.937449	5.239737	7.512478999999999	90.0	90.0	90.0	orthorhombic	orthorhombic	0	0
1712	TiGeO3	693090	Ge	Ti	-2.3211299519999997	OrthoPerovskite_GdFeO3	-2.2836306	train	-2.2894954681396484	-2.264404211436022			5.297573000000001	5.4707669999999995	7.56968	90.0	90.0	90.0	orthorhombic	other	1	1
1713	TiHgO3	681982	Hg	Ti	-2.032421875	OrthoPerovskite_GdFeO3	-2.012466	test	-1.9895234107971191	-1.978259730173574	Hg	Ti	5.405256	5.495393	7.743264999999999	90.0	90.0	90.0	orthorhombic	orthorhombic	1	2
1714	TiHgO3	681983	Ti	Hg	-1.9749031259999998	OrthoPerovskite_GdFeO3	-1.9154788	test	-1.9286121129989624	-1.8759146894378098			5.301042	5.831505	8.969367	90.0	90.0	90.0	orthorhombic	other	2	3
1715	TiInO3	693046	In	Ti	-2.373426228	OrthoPerovskite_GdFeO3	-2.3405194	train	-2.379310131072998	-2.3244357058333107	In	Ti	5.3469120000000006	5.564694	7.858542	90.0	90.0	90.0	orthorhombic	orthorhombic	0	1
1716	TiMnO3	693148	Mn	Ti	-2.777412377	OrthoPerovskite_GdFeO3	-2.760035	train	-2.69413423538208	-2.7671265059728	Mn	Ti	5.131814	5.357067	7.467160000000001	90.0	90.0	90.0	orthorhombic	orthorhombic	0	0
1717	TiPbO3	681487	Pb	Ti	-2.49122733	OrthoPerovskite_GdFeO3	-2.1339567	test	-2.3310794830322266	-2.1064619119100976	Pb	Ti	5.563268	5.590507	7.86908	90.0	90.0	90.0	tetragonal	tetragonal	2	4
1718	TiPbO3	681488	Ti	Pb	-2.366695926	OrthoPerovskite_GdFeO3	-2.3162868	test	-2.296638965606689	-2.2988644300965797			5.589314	5.7735650000000005	9.575861999999999	90.0	90.0	90.0	orthorhombic	other	4	1
1719	TiSbO3	693316	Sb	Ti	-2.175040637	OrthoPerovskite_GdFeO3	-2.0829298	train	-2.289301872253418	-2.052616145055092	Sb	Ti	5.3288150000000005	5.799197	7.727077	90.0	90.0	90.0	orthorhombic	orthorhombic	1	2
1720	TiSnO3	681844	Sn	Ti	-2.4292349669999997	OrthoPerovskite_GdFeO3	-2.4900942	train	-2.1921954154968257	-2.4822734308015937	Sn	Ti	5.530011	5.534477	7.834516000000001	90.0	90.0	90.0	tetragonal	tetragonal	1	1
1721	TiSnO3	681845	Ti	Sn	-2.316406355	OrthoPerovskite_GdFeO3	-2.3725708	train	-2.420627355575561	-2.3582577136718537			5.463201000000001	5.791295	9.182319999999999	90.0	90.0	90.0	orthorhombic	other	4	3
1722	TiTlO3	682122	Tl	Ti	-2.156055128	OrthoPerovskite_GdFeO3	-2.2305737	train	-2.076222419738769	-2.2084163017756397	Tl	Ti	5.513303	5.57019	7.814836	90.0	90.0	90.0	orthorhombic	orthorhombic	0	2
1723	TiTlO3	682123	Ti	Tl	-2.052918697	OrthoPerovskite_GdFeO3	-2.1393042	train	-2.1111311912536617	-2.1121048225759846			5.53946	5.784142	9.003046000000001	90.0	90.0	90.0	orthorhombic	other	4	3
1724	Tl2O3	682795	Tl	Tl	-0.8569104540000001	OrthoPerovskite_GdFeO3	-0.92648214	train	-0.8180518150329591	-0.832283123053431			5.718083	5.814135	8.601855	90.0	90.0	90.0	orthorhombic	other	0	1
1725	TlAgO3	693377	Tl	Ag	-0.482053755	OrthoPerovskite_GdFeO3	-0.55294865	train	-0.4265881776809693	-0.4381146116393242	Tl	Ag	5.541926999999999	5.728253	8.042724	90.0	90.0	90.0	orthorhombic	orthorhombic	0	1
1726	TlAsO3	693168	Tl	As	-0.9340246740000001	OrthoPerovskite_GdFeO3	-1.1739653	train	-0.9296293258666992	-1.093437936179449	Tl	As	5.529037000000001	5.721642	8.045219	90.0	90.0	90.0	orthorhombic	orthorhombic	3	1
1727	TlAuO3	693319	Tl	Au	-0.44772425899999996	OrthoPerovskite_GdFeO3	-0.7288805	test	-0.4657855033874512	-0.6237654228285162	Tl	Au	5.595439	5.809012999999999	8.050756	90.0	90.0	90.0	orthorhombic	orthorhombic	0	0
1728	TlBiO3	681776	Tl	Bi	-1.098058155	OrthoPerovskite_GdFeO3	-1.2019422	train	-0.9734653234481812	-1.1229603573872			5.963211	6.0357389999999995	8.663344	90.0	90.0	90.0	orthorhombic	other	2	0
1729	TlBiO3	681777	Bi	Tl	-1.153656932	OrthoPerovskite_GdFeO3	-1.1834938999999998	train	-0.9485727548599244	-1.103492922354478	Bi	Tl	5.776574	6.246987	8.241201	90.0	90.0	90.0	orthorhombic	orthorhombic	0	1
1730	TlCoO3	682818	Tl	Co	-0.990863743	OrthoPerovskite_GdFeO3	-1.0285212	train	-0.8957104682922363	-0.9399591024851407	Tl	Co	5.293516	5.455496	7.584944999999999	90.0	90.0	90.0	orthorhombic	orthorhombic	0	0
1731	TlCoO3	682819	Co	Tl	-0.665967532	OrthoPerovskite_GdFeO3	-0.93371934	train	-0.9509460330009459	-0.8399201259652882			5.396145	5.449145	8.488286	90.0	90.0	90.0	orthorhombic	other	5	3
1732	TlCrO3	682444	Cr	Tl	-1.4022732690000002	OrthoPerovskite_GdFeO3	-1.4304421999999999	train	-1.380762815475464	-1.3640833283372036			5.378933999999999	5.505655	8.349969	90.0	90.0	90.0	orthorhombic	other	3	4
1733	TlCrO3	682445	Tl	Cr	-1.67183545	OrthoPerovskite_GdFeO3	-1.8221415	train	-1.4541374444961548	-1.7774211792564016	Tl	Cr	5.341613	5.500697	7.693245	90.0	90.0	90.0	orthorhombic	orthorhombic	0	0
1734	TlCuO3	682494	Tl	Cu	-0.71101512	OrthoPerovskite_GdFeO3	-0.7539037	train	-0.6232978105545044	-0.6501709734923066	Tl	Cu	5.286876	5.471305999999999	7.570647999999999	90.0	90.0	90.0	orthorhombic	orthorhombic	0	1
1735	TlCuO3	682495	Cu	Tl	-0.49084782899999996	OrthoPerovskite_GdFeO3	-0.6565473000000001	train	-0.6314272880554199	-0.5474363371290817			5.573962	5.591941	7.639950999999999	90.0	90.0	90.0	tetragonal	other	3	2
1736	TlFeO3	681958	Tl	Fe	-1.24891698	OrthoPerovskite_GdFeO3	-1.4326477	train	-1.1364046335220337	-1.3664106662471827	Tl	Fe	5.346941999999999	5.514591	7.760124	90.0	90.0	90.0	orthorhombic	orthorhombic	0	0
1737	TlFeO3	681959	Fe	Tl	-1.145699592	OrthoPerovskite_GdFeO3	-1.0849280000000001	train	-1.0852558612823486	-0.9994819698714982			5.458296	5.471317	8.440769	90.0	90.0	90.0	tetragonal	other	2	3
1738	TlGaO3	682500	Tl	Ga	-1.453728065	OrthoPerovskite_GdFeO3	-1.4955922	train	-1.2829875946044922	-1.4328323942338894	Tl	Ga	5.315572	5.456868	7.771996000000001	90.0	90.0	90.0	orthorhombic	orthorhombic	0	0
1739	TlGaO3	682501	Ga	Tl	-1.376923766	OrthoPerovskite_GdFeO3	-1.4430549	train	-1.402047872543335	-1.377392788712263			5.393139	5.519857	8.475224	90.0	90.0	90.0	orthorhombic	other	2	2
1740	TlGeO3	682112	Ge	Tl	-1.130850434	OrthoPerovskite_GdFeO3	-1.1999621	test	-1.071517825126648	-1.120870871195611			5.545215	5.837223000000001	8.360694	90.0	90.0	90.0	orthorhombic	other	5	5
1741	TlGeO3	682113	Tl	Ge	-1.226438273	OrthoPerovskite_GdFeO3	-1.4120278	test	-1.1920418739318848	-1.3446516660340888	Tl	Ge	5.422902	5.423093	7.686005000000001	90.0	90.0	90.0	tetragonal	tetragonal	1	1
1742	TlInO3	682673	Tl	In	-1.332214456	OrthoPerovskite_GdFeO3	-1.353752	train	-1.1993186473846436	-1.2831565499269195			5.603669	5.721916	8.232223	90.0	90.0	90.0	orthorhombic	other	0	1
1743	TlInO3	682674	In	Tl	-1.24648623	OrthoPerovskite_GdFeO3	-1.2975273999999999	train	-1.1182548999786377	-1.223825947771665			5.574491	5.69581	8.582053	90.0	90.0	90.0	orthorhombic	other	2	2
1744	TlIrO3	681406	Tl	Ir	-0.822480882	OrthoPerovskite_GdFeO3	-0.83796173	train	-0.7224137783050537	-0.7388726011763527			5.515089	5.581064	7.863125999999999	90.0	90.0	90.0	orthorhombic	other	0	4
1745	TlIrO3	681407	Ir	Tl	-0.539189182	OrthoPerovskite_GdFeO3	-0.6439686	train	-0.6150799989700317	-0.5341627550079052			5.252428	5.456825	9.113242999999999	90.0	90.0	90.0	orthorhombic	other	5	5
1746	TlMoO3	682140	Mo	Tl	-1.6827417000000002	OrthoPerovskite_GdFeO3	-1.7073638	train	-1.655326008796692	-1.656302842176278			5.599322	6.273479	10.28313	90.0	90.0	90.0	orthorhombic	other	4	2
1747	TlMoO3	682141	Tl	Mo	-1.735308976	OrthoPerovskite_GdFeO3	-1.7999767	train	-1.603221416473389	-1.7540319345014228	Tl	Mo	3.98650215	3.9865021500000006	3.9869934999999996	90.0	90.0	90.62331116	cubic	cubic	3	0
1748	TlNiO3	682490	Ni	Tl	-0.675133122	OrthoPerovskite_GdFeO3	-0.7468059	test	-0.5046794414520264	-0.6426810714213704			5.635378	5.635967	7.709661	90.0	90.0	90.0	tetragonal	other	2	3
1749	TlNiO3	682491	Tl	Ni	-0.861947617	OrthoPerovskite_GdFeO3	-0.9962620000000001	test	-0.7130663394927979	-0.9059178152008066	Tl	Ni	5.273436	5.437136	7.5734960000000004	90.0	90.0	90.0	orthorhombic	orthorhombic	0	0
1750	TlOsO3	681722	Tl	Os	-0.973990287	OrthoPerovskite_GdFeO3	-1.0417706	train	-0.9225311279296876	-0.9539404359263003	Tl	Os	3.9416745000000004	3.95329761	3.95329761	90.57180139000002	90.0	90.0	cubic	cubic	2	2
1751	TlOsO3	681723	Os	Tl	-0.929185045	OrthoPerovskite_GdFeO3	-1.0447488999999999	train	-0.9651243686676024	-0.957083265442188			5.576642	7.226975	9.088117	90.0	90.0	90.0	orthorhombic	other	4	1
1752	TlPbO3	682522	Pb	Tl	-0.978125932	OrthoPerovskite_GdFeO3	-1.0990540000000002	train	-0.8458325862884521	-1.0143883291171865			5.78114	6.03145	8.524574000000001	90.0	90.0	90.0	orthorhombic	other	0	1
1753	TlPbO3	682523	Tl	Pb	-0.9716946609999999	OrthoPerovskite_GdFeO3	-1.0742973	train	-0.8878656625747681	-0.9882640006492739			5.8818410000000005	5.964416	8.573876	90.0	90.0	90.0	orthorhombic	other	1	3
1754	TlPdO3	693077	Tl	Pd	-0.734323385	OrthoPerovskite_GdFeO3	-0.8718445	train	-0.6349819898605347	-0.7746271489506006			5.445498000000001	5.614653	7.978727	90.0	90.0	90.0	orthorhombic	other	0	0
1755	TlPtO3	693397	Tl	Pt	-0.702402256	OrthoPerovskite_GdFeO3	-0.8200232	test	-0.695405125617981	-0.7199430972460429	Tl	Pt	5.53069	5.693931	7.911559	90.0	90.0	90.0	orthorhombic	orthorhombic	0	0
1756	TlReO3	682216	Re	Tl	-1.208393752	OrthoPerovskite_GdFeO3	-1.3122938999999998	train	-1.3097174167633057	-1.2394081900059462			5.400823	6.521859	9.707456	90.0	90.0	90.0	orthorhombic	other	5	5
1757	TlReO3	682217	Tl	Re	-1.391666953	OrthoPerovskite_GdFeO3	-1.4077582	train	-1.3070669174194336	-1.3401462015405738	Tl	Re	3.95896492	3.95896492	3.962617	90.0	90.0	90.66006712	cubic	cubic	3	2
1758	TlRhO3	681551	Tl	Rh	-0.9142458590000001	OrthoPerovskite_GdFeO3	-1.1731004999999999	test	-0.7291423082351685	-1.0925253622395033			5.439998	5.580265	7.806919000000001	90.0	90.0	90.0	orthorhombic	other	0	0
1759	TlRhO3	681552	Rh	Tl	-0.615548773	OrthoPerovskite_GdFeO3	-0.920478	test	-0.5810196399688721	-0.8259472977807844			5.371705	5.500104	8.629444	90.0	90.0	90.0	orthorhombic	other	4	2
1760	TlRuO3	681585	Ru	Tl	-0.8927683809999999	OrthoPerovskite_GdFeO3	-0.9981205	train	-0.9387255907058716	-0.9078789838726252			5.51221	5.746571	10.284717	90.0	90.0	90.0	orthorhombic	other	4	4
1761	TlRuO3	681586	Tl	Ru	-0.960135055	OrthoPerovskite_GdFeO3	-1.0740831	train	-0.9365150928497314	-0.98803796764981			5.542098999999999	5.575892	7.813511	90.0	90.0	90.0	orthorhombic	other	0	1
1762	TlSbO3	682010	Sb	Tl	-1.179989456	OrthoPerovskite_GdFeO3	-1.1814075000000002	train	-1.0669164657592771	-1.1012912638573664			5.751281	6.241664	8.221567	90.0	90.0	90.0	orthorhombic	other	4	4
1763	TlSbO3	682011	Tl	Sb	-1.27555845	OrthoPerovskite_GdFeO3	-1.2905537	train	-1.2188498973846436	-1.2164670013274026	Tl	Sb	4.07185	4.07320811	4.07320811	90.15317641	90.0	90.0	cubic	cubic	1	2
1764	TlSiO3	693495	Tl	Si	-1.69828543	OrthoPerovskite_GdFeO3	-1.7294488999999997	test	-1.7529680728912354	-1.6796079840831832	Tl	Si	3.6653935	3.68052333	3.68052513	90.03795467	90.0	90.0	cubic	cubic	2	2
1765	TlSnO3	681850	Tl	Sn	-1.3652509659999998	OrthoPerovskite_GdFeO3	-1.4652921	train	-1.2606513500213623	-1.400858433043158	Tl	Sn	5.693017	5.780634	8.1299	90.0	90.0	90.0	orthorhombic	orthorhombic	0	0
1766	TlSnO3	681851	Sn	Tl	-1.169008375	OrthoPerovskite_GdFeO3	-1.1495813999999998	train	-1.0625929832458496	-1.0677070022129376			5.694082	5.823615	8.665297	90.0	90.0	90.0	orthorhombic	other	4	5
1767	TlTcO3	681706	Tl	Tc	-1.340191509	OrthoPerovskite_GdFeO3	-1.3706764	train	-1.1724085807800293	-1.3010159005157431	Tl	Tc	3.9504635	3.95121049	3.95121049	90.60728408999998	90.0	90.0	cubic	cubic	3	3
1768	TlTcO3	681707	Tc	Tl	-1.284189078	OrthoPerovskite_GdFeO3	-1.2255535	train	-1.2274293899536133	-1.1478760107963546			5.491558	5.946149	10.567472	90.0	90.0	90.0	orthorhombic	other	4	5
1769	TlTeO3	681650	Tl	Te	-1.019831234	OrthoPerovskite_GdFeO3	-1.0355277	test	-0.97079998254776	-0.9473526608919732	Tl	Te	4.14543157	4.14543273	4.148135	90.0	90.0	90.24005986	cubic	cubic	3	3
1770	TlTeO3	681651	Te	Tl	-1.066452674	OrthoPerovskite_GdFeO3	-1.1324769	test	-0.9289525747299194	-1.0496576024028093			6.019255	6.372592	8.249094	90.0	90.0	90.0	orthorhombic	other	0	0
1771	TlVO3	681888	Tl	V	-1.7539770380000002	OrthoPerovskite_GdFeO3	-1.8021908	train	-1.700793981552124	-1.7563683474991487	Tl	V	5.406412	5.512505	7.807474000000001	90.0	90.0	90.0	orthorhombic	orthorhombic	0	0
1772	TlVO3	681889	V	Tl	-1.56564865	OrthoPerovskite_GdFeO3	-1.5524338	train	-1.5318526029586792	-1.4928140811728468			5.574882	5.589378	8.115924	90.0	90.0	90.0	tetragonal	other	4	3
1773	TlWO3	682144	Tl	W	-1.841609583	OrthoPerovskite_GdFeO3	-1.8665445	train	-1.6697101593017578	-1.8242771235850361	Tl	W	3.9885879999999996	3.9904900000000003	3.9904900000000003	90.56492878	90.0	90.0	cubic	cubic	3	2
1774	TlWO3	682145	W	Tl	-1.7399219240000001	OrthoPerovskite_GdFeO3	-1.801091	train	-1.6854113340377808	-1.755207791510305			5.342097	6.559353999999999	6.65689854	119.51644999	113.65604424999998	90.0	error	other	4	4
1775	TmAlO3	682074	Tm	Al	-3.615650477	OrthoPerovskite_GdFeO3	-3.5376233999999998	train	-3.721219539642334	-3.5876710363196698	Tm	Al	5.10796	5.338775	7.316219	90.0	90.0	90.0	orthorhombic	orthorhombic	0	0
1776	TmAlO3	682075	Al	Tm	-3.37746386	OrthoPerovskite_GdFeO3	-3.2830522000000006	train	-3.4190049171447754	-3.3190366202920663			5.3099620000000005	5.319552	8.235116	90.0	90.0	90.0	tetragonal	other	5	3
1777	TmBeO3	693301	Tm	Be	-2.785585958	OrthoPerovskite_GdFeO3	-2.7287147000000003	train	-2.8900883197784424	-2.734075986117022	Tm	Be	4.875933	5.333397	6.959271	90.0	90.0	90.0	orthorhombic	orthorhombic	1	2
1778	TmCoO3	693116	Tm	Co	-2.565841814	OrthoPerovskite_GdFeO3	-2.5118377	test	-2.568929433822632	-2.50521810178125	Tm	Co	5.1129370000000005	5.543574	7.404317	90.0	90.0	90.0	orthorhombic	orthorhombic	0	0
1779	TmCrO3	693225	Tm	Cr	-3.2290625310000003	OrthoPerovskite_GdFeO3	-3.1954985000000002	test	-3.09200382232666	-3.2266462121447343	Tm	Cr	5.208611	5.541276	7.5284759999999995	90.0	90.0	90.0	orthorhombic	orthorhombic	0	0
1780	TmCuO3	681792	Tm	Cu	-2.305892132	OrthoPerovskite_GdFeO3	-2.3082347000000003	test	-2.460862159729004	-2.290367509858565	Tm	Cu	5.151854	5.823193	7.106407000000001	90.0	90.0	90.0	orthorhombic	orthorhombic	0	0
1781	TmCuO3	681793	Cu	Tm	-2.044045405	OrthoPerovskite_GdFeO3	-2.0680582999999997	test	-2.135507583618164	-2.0369231023308774			5.371012	5.547474	7.85882	90.0	90.0	90.0	orthorhombic	other	4	3
1782	TmFeO3	693392	Tm	Fe	-2.805250519	OrthoPerovskite_GdFeO3	-2.8145206000000003	train	-2.776774406433105	-2.8246220409662075	Tm	Fe	5.2285260000000005	5.5592690000000005	7.5585759999999995	90.0	90.0	90.0	orthorhombic	orthorhombic	0	0
1783	TmMnO3	693362	Tm	Mn	-2.980524341	OrthoPerovskite_GdFeO3	-2.7974946	test	-3.00076675415039	-2.8066554777128383	Tm	Mn	5.220059	5.688333999999999	7.421811999999999	90.0	90.0	90.0	orthorhombic	orthorhombic	0	1
1784	TmNiO3	681814	Ni	Tm	-2.1690563480000002	OrthoPerovskite_GdFeO3	-2.1987493	train	-2.12392807006836	-2.1748338340439055			5.550467	5.597936	7.635885000000001	90.0	90.0	90.0	orthorhombic	other	2	3
1785	TmNiO3	681815	Tm	Ni	-2.434592865	OrthoPerovskite_GdFeO3	-2.3920014	train	-2.534210205078125	-2.3787617136689696	Tm	Ni	5.096325	5.510093	7.301581	90.0	90.0	90.0	orthorhombic	orthorhombic	0	1
1786	TmNpO3	693307	Np	Tm	-3.7238743210000003	OrthoPerovskite_GdFeO3	-3.643911	train	-3.760559558868408	-3.699830256832342	Np	Tm	5.757756	6.033791000000001	8.28766	90.0	90.0	90.0	orthorhombic	orthorhombic	0	0
1787	TmPbO3	682560	Pb	Tm	-2.46434451	OrthoPerovskite_GdFeO3	-2.4694932	train	-2.4785280227661133	-2.460534374676688	Pb	Tm	5.7444180000000005	5.995957	8.362801	90.0	90.0	90.0	orthorhombic	orthorhombic	0	0
1788	TmPbO3	682561	Tm	Pb	-2.362303583	OrthoPerovskite_GdFeO3	-2.3576846000000002	train	-2.2859890460968018	-2.3425491588790486			5.733781	6.001999	8.480549	90.0	90.0	90.0	orthorhombic	other	2	2
1789	TmTiO3	693287	Tm	Ti	-3.481505138	OrthoPerovskite_GdFeO3	-3.3273847	test	-3.424358367919922	-3.365818170006031	Tm	Ti	5.245181	5.630832	7.574659	90.0	90.0	90.0	orthorhombic	orthorhombic	0	1
1790	TmTlO3	682484	Tl	Tm	-2.346412778	OrthoPerovskite_GdFeO3	-2.4087272	train	-2.2938735485076904	-2.396411493045406			5.700578	5.804341	8.347021	90.0	90.0	90.0	orthorhombic	other	0	0
1791	TmTlO3	682485	Tm	Tl	-2.301138355	OrthoPerovskite_GdFeO3	-2.3710842	train	-2.178261995315552	-2.3566889897829504			5.479503	5.824763	8.655661	90.0	90.0	90.0	orthorhombic	other	2	1
1792	TmVO3	693520	Tm	V	-3.292535969	OrthoPerovskite_GdFeO3	-3.041816	test	-3.1384541988372803	-3.0644738664859856	Tm	V	5.244505	5.631664	7.55815	90.0	90.0	90.0	orthorhombic	orthorhombic	0	1
1793	TmZnO3	693580	Tm	Zn	-2.468939297	OrthoPerovskite_GdFeO3	-2.412506	train	-2.6243457794189453	-2.4003990443916896	Tm	Zn	5.18652	5.7365260000000005	7.384661	90.0	90.0	90.0	orthorhombic	orthorhombic	0	0
1794	UAgO3	682000	U	Ag	-2.1838932630000003	OrthoPerovskite_GdFeO3	-2.1863005	train	-2.2581005096435547	-2.1616973279574183	U	Ag	5.530231	6.255128	7.83073	90.0	90.0	90.0	orthorhombic	orthorhombic	4	4
1795	UAgO3	682001	Ag	U	-2.495808527	OrthoPerovskite_GdFeO3	-2.4776475	train	-2.3385241031646733	-2.4691391407249044	Ag	U	5.758528	5.9824459999999995	8.365349	90.0	90.0	90.0	orthorhombic	orthorhombic	1	0
1796	UAlO3	682924	U	Al	-3.391699944	OrthoPerovskite_GdFeO3	-3.1153564	test	-3.212375402450561	-3.1420768412468245	U	Al	3.7700635	3.77944466	3.77944466	90.09656240000001	90.0	90.0	cubic	cubic	0	2
1797	UAlO3	682925	Al	U	-2.9397248210000004	OrthoPerovskite_GdFeO3	-2.8951123	test	-3.4966845512390137	-2.9096658490095835			5.720066	5.961412999999999	8.125255000000001	90.0	90.0	90.0	orthorhombic	other	4	4
1798	UAuO3	693258	Au	U	-2.267404164	OrthoPerovskite_GdFeO3	-2.3240472999999997	train	-2.4737026691436768	-2.307053641545409			5.812641999999999	6.081832	8.483701	90.0	90.0	90.0	orthorhombic	other	0	0
1799	UCdO3	681768	U	Cd	-2.5995747319999998	OrthoPerovskite_GdFeO3	-2.5790632000000002	train	-2.5186212062835693	-2.57615732402895			5.620366000000001	6.034993	8.278215	90.0	90.0	90.0	orthorhombic	other	1	1
1800	UCdO3	681769	Cd	U	-2.669647984	OrthoPerovskite_GdFeO3	-2.6301885	train	-2.6561741828918457	-2.630106926771664			5.794469	5.966554	8.560513	90.0	90.0	90.0	orthorhombic	other	0	0
1801	UCuO3	681605	Cu	U	-2.596687776	OrthoPerovskite_GdFeO3	-2.5896652000000002	train	-2.8980712890625	-2.5873450077839255			5.521738	5.941725	8.292032	90.0	90.0	90.0	orthorhombic	other	1	0
1802	UGaO3	682240	U	Ga	-2.750061583	OrthoPerovskite_GdFeO3	-2.8472722000000004	test	-2.904516696929932	-2.859182929786191	U	Ga	5.475007	5.5023349999999995	7.862146000000001	90.0	90.0	90.0	tetragonal	tetragonal	0	0
1803	UGaO3	682241	Ga	U	-2.6179200469999997	OrthoPerovskite_GdFeO3	-2.5285857000000003	test	-2.713491916656494	-2.5228913075469857			5.894794999999999	6.080509999999999	8.611263000000001	90.0	90.0	90.0	orthorhombic	other	4	6
1804	UHgO3	682866	U	Hg	-2.225531309	OrthoPerovskite_GdFeO3	-2.206166	train	-2.2931692600250244	-2.1826602530314108			5.681408	6.135491	8.837532000000001	90.0	90.0	90.0	orthorhombic	other	4	4
1805	UHgO3	682867	Hg	U	-2.349358997	OrthoPerovskite_GdFeO3	-2.3718174	train	-2.4402759075164795	-2.357462693775513			5.995879	6.122072	8.560989	90.0	90.0	90.0	orthorhombic	other	2	2
1806	UInO3	681689	In	U	-2.582454031	OrthoPerovskite_GdFeO3	-2.5096842999999995	train	-2.526977300643921	-2.5029457420191323	In	U	5.86034	6.146795	8.550514999999999	90.0	90.0	90.0	orthorhombic	orthorhombic	2	3
1807	UMnO3	693514	U	Mn	-2.9913627910000002	OrthoPerovskite_GdFeO3	-2.8874013	train	-3.030338287353516	-2.901528872077437	U	Mn	5.462568	5.939522	7.878514	90.0	90.0	90.0	orthorhombic	orthorhombic	0	0
1808	UPbO3	681593	Pb	U	-2.715165962	OrthoPerovskite_GdFeO3	-2.67353	test	-2.696777105331421	-2.675842730909211	Pb	U	6.031944	6.277632	8.710593	90.0	90.0	90.0	orthorhombic	orthorhombic	0	0
1809	UPbO3	681594	U	Pb	-2.553937333	OrthoPerovskite_GdFeO3	-2.3987467000000002	test	-2.6029577255249023	-2.385879642666559			5.705941	5.962712000000001	10.215311999999999	90.0	90.0	90.0	orthorhombic	other	1	3
1810	UTaO3	693513	U	Ta	-2.78282565	OrthoPerovskite_GdFeO3	-2.8462281000000003	train	-2.503866195678711	-2.8580811508191495	U	Ta	5.482864	6.11945	7.786467999999999	90.0	90.0	90.0	orthorhombic	orthorhombic	1	0
1811	UTiO3	682440	U	Ti	-3.271137255	OrthoPerovskite_GdFeO3	-3.1750607000000004	test	-3.2205653190612797	-3.2050793716384676	U	Ti	5.4631989999999995	5.691631	7.887617999999999	90.0	90.0	90.0	orthorhombic	orthorhombic	0	0
1812	UTiO3	682441	Ti	U	-3.00094879	OrthoPerovskite_GdFeO3	-3.0232275	test	-3.1394138336181636	-3.0448584864181343			5.691351999999999	5.952788	8.015675	90.0	90.0	90.0	orthorhombic	other	4	2
1813	UTlO3	681791	U	Tl	-2.2380932999999996	OrthoPerovskite_GdFeO3	-2.2675033	train	-2.2456164360046387	-2.247385994852206			5.939004	6.187028	8.482553999999999	90.0	90.0	90.0	orthorhombic	other	3	3
1814	UVO3	693175	U	V	-3.175960256	OrthoPerovskite_GdFeO3	-3.1074349999999997	train	-2.9717776775360107	-3.133717841237707	U	V	5.392316	5.949269	7.759621000000001	90.0	90.0	90.0	orthorhombic	orthorhombic	0	0
1815	VAgO3	682318	Ag	V	-1.530249793	OrthoPerovskite_GdFeO3	-1.4323861999999998	train	-1.684192419052124	-1.3661347202651106	Ag	V	5.2716199999999995	5.299444	7.4972449999999995	90.0	90.0	90.0	orthorhombic	orthorhombic	2	3
1816	VAgO3	682319	V	Ag	-1.632929668	OrthoPerovskite_GdFeO3	-1.642885	train	-1.710535168647766	-1.5882620552209559			5.178989	5.572237	9.021525	90.0	90.0	90.0	orthorhombic	other	0	1
1817	VAuO3	693391	Au	V	-1.357710879	OrthoPerovskite_GdFeO3	-1.5249780000000002	test	-1.5706799030303955	-1.463841546967993			3.597177	5.524098	5.564524	90.0	90.0	90.0	orthorhombic	other	0	0
1818	VBiO3	682938	Bi	V	-2.045257655	OrthoPerovskite_GdFeO3	-1.8777999	test	-1.8878992795944212	-1.8361543029602252	Bi	V	5.448119	5.749986	7.828310000000001	90.0	90.0	90.0	orthorhombic	orthorhombic	0	2
1819	VBiO3	682939	V	Bi	-1.8190506659999999	OrthoPerovskite_GdFeO3	-1.813159	test	-1.7689973115921018	-1.7679424611533012			5.723999	5.773349	8.382188000000001	90.0	90.0	90.0	orthorhombic	other	3	3
1820	VCdO3	681636	V	Cd	-1.843457705	OrthoPerovskite_GdFeO3	-1.9017256	train	-1.9284919500350952	-1.8614017246935228			5.335276	5.416189	8.671397	90.0	90.0	90.0	orthorhombic	other	3	4
1821	VCdO3	681637	Cd	V	-1.9821889190000002	OrthoPerovskite_GdFeO3	-1.9817624	train	-1.9597231149673464	-1.94585997852867	Cd	V	5.282148	5.340211	7.660626	90.0	90.0	90.0	orthorhombic	orthorhombic	0	0
1822	VCuO3	693182	Cu	V	-1.736772479	OrthoPerovskite_GdFeO3	-1.9708048999999999	test	-1.7136069536209106	-1.9342971559720632	Cu	V	4.948778	5.13402	7.462594	90.0	90.0	90.0	orthorhombic	orthorhombic	0	0
1823	VHgO3	682902	Hg	V	-1.5785917680000001	OrthoPerovskite_GdFeO3	-1.6592748	train	-1.636283278465271	-1.6055572730296053	Hg	V	5.371835	5.38398	7.795936	90.0	90.0	90.0	tetragonal	tetragonal	0	0
1824	VHgO3	682903	V	Hg	-1.475549964	OrthoPerovskite_GdFeO3	-1.5305911	train	-1.5797510147094729	-1.4697647301112728			5.259238	5.6778129999999996	8.899488	90.0	90.0	90.0	orthorhombic	other	2	1
1825	VPbO3	681422	Pb	V	-2.017288439	OrthoPerovskite_GdFeO3	-2.0228074	train	-1.9554322957992556	-1.989172417664963	Pb	V	5.45972	5.482018	7.949455	90.0	90.0	90.0	tetragonal	tetragonal	1	2
1826	VSbO3	693489	Sb	V	-1.9932715840000002	OrthoPerovskite_GdFeO3	-1.9867496	train	-1.944244623184204	-1.9511226852276717			5.306037	5.791079	7.680803	90.0	90.0	90.0	orthorhombic	other	0	1
1827	VSnO3	682190	Sn	V	-2.010314541	OrthoPerovskite_GdFeO3	-2.0291824	train	-1.9900906085968015	-1.9958995902680536	Sn	V	5.410575	5.57428	7.672405	90.0	90.0	90.0	orthorhombic	orthorhombic	0	0
1828	VSnO3	682191	V	Sn	-1.985342034	OrthoPerovskite_GdFeO3	-2.0148919999999997	train	-1.8049644231796265	-1.9808197491124129	V	Sn	5.361813	5.584707	7.763022	90.0	90.0	90.0	orthorhombic	orthorhombic	1	1
1829	YAlO3	681884	Y	Al	-3.559691782	OrthoPerovskite_GdFeO3	-3.537895	train	-3.5101571083068848	-3.5879576402536304	Y	Al	5.187901999999999	5.347037	7.393935000000001	90.0	90.0	90.0	orthorhombic	orthorhombic	0	0
1830	YAlO3	681885	Al	Y	-3.3235861780000002	OrthoPerovskite_GdFeO3	-3.2870512	train	-3.327540874481201	-3.323256536094381			5.3650839999999995	5.376494	8.402510000000001	90.0	90.0	90.0	tetragonal	other	5	4
1831	YBeO3	693208	Y	Be	-2.7233110330000003	OrthoPerovskite_GdFeO3	-2.711842	test	-2.8486313819885254	-2.7162711915789552	Y	Be	4.996241	5.292545	7.059374000000001	90.0	90.0	90.0	orthorhombic	orthorhombic	0	1
1832	YCoO3	681418	Y	Co	-2.5075236690000002	OrthoPerovskite_GdFeO3	-2.503997	train	-2.5726654529571533	-2.4969442598629668	Y	Co	5.193295	5.572013	7.429246000000001	90.0	90.0	90.0	orthorhombic	orthorhombic	0	0
1833	YCoO3	681419	Co	Y	-2.34503939	OrthoPerovskite_GdFeO3	-2.3511147	train	-2.4031364917755127	-2.3356163194617863			5.453787	5.5139949999999995	8.352533	90.0	90.0	90.0	orthorhombic	other	2	3
1834	YCrO3	693074	Y	Cr	-3.178100927	OrthoPerovskite_GdFeO3	-3.1488902999999997	train	-3.00943374633789	-3.1774632464789483	Y	Cr	5.281369000000001	5.577823	7.600341	90.0	90.0	90.0	orthorhombic	orthorhombic	0	1
1835	YCuO3	681543	Y	Cu	-2.258963724	OrthoPerovskite_GdFeO3	-2.2703849999999997	train	-2.418011426925659	-2.250426887917355	Y	Cu	5.23666	5.899361	7.1736320000000005	90.0	90.0	90.0	orthorhombic	orthorhombic	0	0
1836	YCuO3	681544	Cu	Y	-1.986097356	OrthoPerovskite_GdFeO3	-2.0208352	train	-2.1387767791748047	-1.9870912678911878			5.5003	5.581673	8.033635	90.0	90.0	90.0	orthorhombic	other	5	5
1837	YFeO3	693115	Y	Fe	-2.757821525	OrthoPerovskite_GdFeO3	-2.751737	train	-2.708113193511963	-2.758370101539789	Y	Fe	5.297994	5.6070519999999995	7.627231	90.0	90.0	90.0	orthorhombic	orthorhombic	0	0
1838	YGaO3	682244	Y	Ga	-2.945967959	OrthoPerovskite_GdFeO3	-2.9977110000000002	test	-2.9345054626464844	-3.01793238450021	Y	Ga	5.276528	5.565009	7.569028	90.0	90.0	90.0	orthorhombic	orthorhombic	0	0
1839	YGaO3	682245	Ga	Y	-2.800312487	OrthoPerovskite_GdFeO3	-2.6761205	test	-2.8256585597991943	-2.678576337282279			5.476129	5.5002059999999995	8.389133000000001	90.0	90.0	90.0	tetragonal	other	3	4
1840	YHfO3	693508	Y	Hf	-3.427627507	OrthoPerovskite_GdFeO3	-3.3763967000000004	train	-3.3410859107971187	-3.4175377282213555	Y	Hf	5.464028	6.050992	7.547633	90.0	90.0	90.0	orthorhombic	orthorhombic	0	0
1841	YMgO3	693545	Y	Mg	-2.902266936	OrthoPerovskite_GdFeO3	-2.9633486	train	-2.913231372833252	-2.9816717106403745	Y	Mg	5.422696	5.75749	7.370777	90.0	90.0	90.0	orthorhombic	orthorhombic	0	0
1842	YMnO3	693099	Y	Mn	-2.9359479160000004	OrthoPerovskite_GdFeO3	-2.9052274	train	-2.8744120597839355	-2.9203397350640965	Y	Mn	5.292875	5.738688	7.493128	90.0	90.0	90.0	orthorhombic	orthorhombic	0	0
1843	YNiO3	682042	Y	Ni	-2.380548741	OrthoPerovskite_GdFeO3	-2.460068	test	-2.4970111846923833	-2.450588500603174	Y	Ni	5.181639	5.522697	7.4091380000000004	90.0	90.0	90.0	orthorhombic	orthorhombic	0	0
1844	YNiO3	682043	Ni	Y	-2.104264325	OrthoPerovskite_GdFeO3	-2.163373	test	-2.10481071472168	-2.1375032495484194			5.6402529999999995	5.645096	7.747331	90.0	90.0	90.0	tetragonal	other	4	3
1845	YScO3	693475	Y	Sc	-3.780541201	OrthoPerovskite_GdFeO3	-3.4120128	test	-3.5339570045471187	-3.4551213599309936	Y	Sc	5.430236	5.7207040000000005	7.900509	90.0	90.0	90.0	orthorhombic	orthorhombic	0	0
1846	YTiO3	693052	Y	Ti	-3.4399953	OrthoPerovskite_GdFeO3	-3.393982	train	-3.33210563659668	-3.4360944887511016	Y	Ti	5.309093	5.675866	7.644889999999999	90.0	90.0	90.0	orthorhombic	orthorhombic	0	0
1847	YTlO3	682756	Y	Tl	-2.265063853	OrthoPerovskite_GdFeO3	-2.358404	train	-2.1764438152313232	-2.3433083005215054			5.576185	5.929867	8.548667	90.0	90.0	90.0	orthorhombic	other	2	0
1848	YTlO3	682757	Tl	Y	-2.2777022319999998	OrthoPerovskite_GdFeO3	-2.3300006	train	-2.25534462928772	-2.313335818276073			5.787239	5.865747	8.464897	90.0	90.0	90.0	orthorhombic	other	0	1
1849	YVO3	693293	Y	V	-3.250152192	OrthoPerovskite_GdFeO3	-3.1289957000000004	train	-3.079113006591797	-3.1564696138406036	Y	V	5.3130239999999995	5.702851	7.605001	90.0	90.0	90.0	orthorhombic	orthorhombic	0	0
1850	YZnO3	693274	Y	Zn	-2.4233543490000002	OrthoPerovskite_GdFeO3	-2.4155786	train	-2.4535627365112305	-2.403641383299965	Y	Zn	5.255039	5.777346	7.461378	90.0	90.0	90.0	orthorhombic	orthorhombic	0	0
1851	YbAgO3	682602	Yb	Ag	-1.502816229	OrthoPerovskite_GdFeO3	-1.4623968999999999	test	-1.6643047332763672	-1.3978032942007312	Yb	Ag	5.4198699999999995	5.804417	7.604995	90.0	90.0	90.0	orthorhombic	orthorhombic	0	0
1852	YbAgO3	682603	Ag	Yb	-1.234399974	OrthoPerovskite_GdFeO3	-1.2128562	test	-1.29832661151886	-1.134477276883692			5.800145	5.981201	7.2852179999999995	90.0	90.0	90.0	orthorhombic	other	3	5
1853	YbAlO3	682918	Yb	Al	-3.0463435239999996	OrthoPerovskite_GdFeO3	-3.1281617	train	-3.297192096710205	-3.155589541377705	Yb	Al	3.67411837	3.67411837	3.6743905	90.0	90.0	89.92768541000002	cubic	cubic	1	1
1854	YbAlO3	682919	Al	Yb	-2.9231687280000003	OrthoPerovskite_GdFeO3	-2.8993545	train	-3.0905160903930664	-2.914142399851439			5.1190620000000004	5.579946	8.294003	90.0	90.0	90.0	orthorhombic	other	4	4
1855	YbAsO3	681547	As	Yb	-2.301935243	OrthoPerovskite_GdFeO3	-2.3687720000000003	train	-2.1945524215698238	-2.3542490574703443			5.405255	5.8799980000000005	8.406449	90.0	90.0	90.0	orthorhombic	other	0	0
1856	YbAsO3	681548	Yb	As	-2.278898798	OrthoPerovskite_GdFeO3	-2.2728593	train	-2.3218095302581787	-2.253037875081563	Yb	As	5.322456	5.518079	7.624825	90.0	90.0	90.0	orthorhombic	orthorhombic	1	2
1857	YbAuO3	693102	Yb	Au	-1.573791832	OrthoPerovskite_GdFeO3	-1.6285548	train	-1.6729512214660645	-1.5731402154034166	Yb	Au	5.460187	5.897598	7.512739999999999	90.0	90.0	90.0	orthorhombic	orthorhombic	0	0
1858	YbBiO3	693137	Yb	Bi	-2.220591313	OrthoPerovskite_GdFeO3	-2.246542	train	-2.1416356563568115	-2.2252667347604143	Yb	Bi	5.683465	5.989076	8.25575	90.0	90.0	90.0	orthorhombic	orthorhombic	0	0
1859	YbCoO3	681511	Yb	Co	-2.1092529819999997	OrthoPerovskite_GdFeO3	-2.2038085	test	-2.1396965980529785	-2.1801725182217186	Yb	Co	5.136645	5.3418	7.396425	90.0	90.0	90.0	orthorhombic	orthorhombic	0	3
1860	YbCoO3	681512	Co	Yb	-1.92398238	OrthoPerovskite_GdFeO3	-2.0112984	test	-2.010674238204956	-1.9770276287255162			5.273061	5.533982	8.404869999999999	90.0	90.0	90.0	orthorhombic	other	4	4
1861	YbCrO3	682767	Cr	Yb	-2.577036571	OrthoPerovskite_GdFeO3	-2.4801797999999997	train	-2.6551742553710938	-2.4718113319692665			5.43354	5.434491	8.434012	90.0	90.0	90.0	tetragonal	other	4	5
1862	YbCrO3	682768	Yb	Cr	-2.789404246	OrthoPerovskite_GdFeO3	-2.8057404	train	-2.816157341003418	-2.8153567984737116	Yb	Cr	5.190871	5.405882	7.389054	90.0	90.0	90.0	orthorhombic	orthorhombic	0	1
1863	YbCuO3	682695	Yb	Cu	-1.75200701	OrthoPerovskite_GdFeO3	-1.7767085999999999	test	-1.8541101217269895	-1.7294784404079355	Yb	Cu	5.17795	5.301830000000001	7.367877	90.0	90.0	90.0	orthorhombic	orthorhombic	0	3
1864	YbCuO3	682696	Cu	Yb	-1.594972215	OrthoPerovskite_GdFeO3	-1.7022176	test	-1.866962432861328	-1.6508723518782347			5.663273	5.665385	6.903311	90.0	90.0	90.0	tetragonal	other	4	4
1865	YbFeO3	682414	Yb	Fe	-2.384294866	OrthoPerovskite_GdFeO3	-2.4616485	train	-2.3831429481506348	-2.4522563117873593	Yb	Fe	5.221467	5.341391000000001	7.42928	90.0	90.0	90.0	orthorhombic	orthorhombic	0	0
1866	YbFeO3	682415	Fe	Yb	-2.132402165	OrthoPerovskite_GdFeO3	-2.1149247000000004	train	-2.204217433929444	-2.086378531677623			5.523368	5.641383	8.01275	90.0	90.0	90.0	orthorhombic	other	3	4
1867	YbGaO3	682898	Yb	Ga	-2.373441489	OrthoPerovskite_GdFeO3	-2.35039	test	-2.528971910476685	-2.3348515850326943	Yb	Ga	5.210208000000001	5.547756	7.484628999999999	90.0	90.0	90.0	orthorhombic	orthorhombic	0	3
1868	YbGaO3	682899	Ga	Yb	-2.357924626	OrthoPerovskite_GdFeO3	-2.3642724	test	-2.399770736694336	-2.3495008871417373			5.187101	5.640775	8.468194	90.0	90.0	90.0	orthorhombic	other	2	1
1869	YbGeO3	682204	Ge	Yb	-2.545346086	OrthoPerovskite_GdFeO3	-2.59088	train	-2.5558419227600098	-2.588626916690315			5.190898000000001	5.220391	9.326312	90.0	90.0	90.0	orthorhombic	other	4	2
1870	YbGeO3	682205	Yb	Ge	-2.688174732	OrthoPerovskite_GdFeO3	-2.6109166	train	-2.618476152420044	-2.6097703938007606	Yb	Ge	5.2011199999999995	5.289186	7.403898	90.0	90.0	90.0	orthorhombic	orthorhombic	0	1
1871	YbHfO3	681384	Yb	Hf	-3.81553977	OrthoPerovskite_GdFeO3	-3.6585707999999997	train	-3.6510498523712163	-3.715299904663995	Yb	Hf	5.48144	5.690082	7.880597	90.0	90.0	90.0	orthorhombic	orthorhombic	0	2
1872	YbHfO3	681385	Hf	Yb	-3.54331549	OrthoPerovskite_GdFeO3	-3.3945186	train	-3.4268040657043457	-3.4366607320167986			5.538658	5.697261	8.201584	90.0	90.0	90.0	orthorhombic	other	4	4
1873	YbInO3	693343	Yb	In	-2.188913115	OrthoPerovskite_GdFeO3	-2.276524	train	-2.260666847229004	-2.2569050232287866	Yb	In	5.6958519999999995	5.972704	7.48768	90.0	90.0	90.0	orthorhombic	orthorhombic	0	0
1874	YbIrO3	682466	Ir	Yb	-1.7091097730000002	OrthoPerovskite_GdFeO3	-1.8007193	test	-1.588308334350586	-1.7548155577759412			5.6764410000000005	5.786298	7.443683	90.0	90.0	90.0	orthorhombic	other	4	3
1875	YbIrO3	682467	Yb	Ir	-2.106261298	OrthoPerovskite_GdFeO3	-2.151503	test	-2.05576491355896	-2.1249775179721544	Yb	Ir	5.167752	5.700022	7.5495	90.0	90.0	90.0	orthorhombic	orthorhombic	0	0
1876	YbLuO3	693481	Yb	Lu	-3.244117437	OrthoPerovskite_GdFeO3	-3.220056	test	-3.3480682373046875	-3.2525603362546014			5.74489	5.968	7.673528	90.0	90.0	90.0	orthorhombic	other	0	0
1877	YbMgO3	693426	Yb	Mg	-2.351563724	OrthoPerovskite_GdFeO3	-2.2726203999999997	train	-2.538766860961914	-2.252785777585896			3.944386	6.759580000000001	8.277946	90.0	90.0	90.0	orthorhombic	other	0	1
1878	YbMnO3	681515	Mn	Yb	-2.280861453	OrthoPerovskite_GdFeO3	-2.2957162999999996	train	-2.423459529876709	-2.277157558875892			5.385349	5.5018139999999995	8.215634	90.0	90.0	90.0	orthorhombic	other	5	4
1879	YbMnO3	681516	Yb	Mn	-2.610281695	OrthoPerovskite_GdFeO3	-2.5136068	train	-2.6302483081817627	-2.5070849317502106	Yb	Mn	5.193078	5.322127	7.398214	90.0	90.0	90.0	orthorhombic	orthorhombic	0	0
1880	YbMoO3	681366	Mo	Yb	-2.450419953	OrthoPerovskite_GdFeO3	-2.4400517999999995	test	-2.4744949340820312	-2.429466550445057			5.5017830000000005	5.784083	8.07593	90.0	90.0	90.0	orthorhombic	other	4	4
1881	YbMoO3	681367	Yb	Mo	-2.758359295	OrthoPerovskite_GdFeO3	-2.6652240000000003	test	-2.7881929874420166	-2.66707788453411	Yb	Mo	5.328943	5.605035	7.685455	90.0	90.0	90.0	orthorhombic	orthorhombic	0	1
1882	YbNbO3	681746	Nb	Yb	-2.874128859	OrthoPerovskite_GdFeO3	-2.7251724999999998	test	-2.7261898517608643	-2.730338105208054			5.649894000000001	5.7960519999999995	7.855132000000001	90.0	90.0	90.0	orthorhombic	other	3	3
1883	YbNbO3	681747	Yb	Nb	-3.15698497	OrthoPerovskite_GdFeO3	-2.9484735	test	-3.0099663734436035	-2.965974869042219	Yb	Nb	5.432087999999999	5.661418	7.825827	90.0	90.0	90.0	orthorhombic	orthorhombic	0	0
1884	YbNiO3	682388	Ni	Yb	-1.7877022180000002	OrthoPerovskite_GdFeO3	-1.9354942	test	-1.9046288728713991	-1.8970357954017163			5.703965	5.726325	7.069864	90.0	90.0	90.0	tetragonal	other	3	3
1885	YbNiO3	682389	Yb	Ni	-1.872804344	OrthoPerovskite_GdFeO3	-2.2349	test	-2.0792570114135738	-2.212981598533719	Yb	Ni	5.125509	5.319135	7.322503	90.0	90.0	90.0	orthorhombic	orthorhombic	0	1
1886	YbOsO3	682034	Yb	Os	-2.1881757040000003	OrthoPerovskite_GdFeO3	-2.2413025	test	-2.1535711288452153	-2.219737790312745	Yb	Os	5.1818349999999995	5.654512	7.574084	90.0	90.0	90.0	orthorhombic	orthorhombic	0	0
1887	YbOsO3	682035	Os	Yb	-1.820964146	OrthoPerovskite_GdFeO3	-1.8980211999999999	test	-1.758749008178711	-1.857492683408677			5.180751	6.149132	7.687558	90.0	90.0	90.0	orthorhombic	other	5	5
1888	YbPaO3	693516	Yb	Pa	-3.307586329	OrthoPerovskite_GdFeO3	-3.2166007000000003	train	-3.155484676361084	-3.248914155941588	Yb	Pa	5.849851999999999	6.085755000000001	8.497213	90.0	90.0	90.0	orthorhombic	orthorhombic	0	0
1889	YbPbO3	693131	Yb	Pb	-2.156744385	OrthoPerovskite_GdFeO3	-2.2098732000000005	train	-2.1251957416534424	-2.1865722489959882	Yb	Pb	5.6130510000000005	5.888745	8.124718	90.0	90.0	90.0	orthorhombic	orthorhombic	0	0
1890	YbPdO3	682882	Yb	Pd	-1.893774506	OrthoPerovskite_GdFeO3	-1.8749512	train	-1.9364399909973145	-1.8331482329061974	Yb	Pd	5.239017	5.650257	7.578597	90.0	90.0	90.0	orthorhombic	orthorhombic	0	0
1891	YbPdO3	682883	Pd	Yb	-1.534657201	OrthoPerovskite_GdFeO3	-1.6073012	train	-1.5578463077545166	-1.5507125078525064			5.370964	5.643196	8.171763	90.0	90.0	90.0	orthorhombic	other	3	4
1892	YbPtO3	682677	Yb	Pt	-1.980357225	OrthoPerovskite_GdFeO3	-2.0120156000000002	train	-2.0495738983154297	-1.9777844488338987	Yb	Pt	5.227374	5.703746	7.592753	90.0	90.0	90.0	orthorhombic	orthorhombic	0	0
1893	YbPtO3	682678	Pt	Yb	-1.5994421369999998	OrthoPerovskite_GdFeO3	-1.5662715	train	-1.6491639614105225	-1.507416213930461			5.204332	5.604862000000001	8.521502	90.0	90.0	90.0	orthorhombic	other	3	5
1894	YbReO3	682182	Re	Yb	-2.068247566	OrthoPerovskite_GdFeO3	-2.124703	train	-1.881049633026123	-2.0966970119701407			5.17356	6.163658	7.802238000000001	90.0	90.0	90.0	orthorhombic	other	5	4
1895	YbReO3	682183	Yb	Re	-2.418681696	OrthoPerovskite_GdFeO3	-2.369894	train	-2.3364100456237797	-2.355433039848488	Yb	Re	5.265524	5.62378	7.620184	90.0	90.0	90.0	orthorhombic	orthorhombic	0	1
1896	YbRhO3	681452	Yb	Rh	-2.1145985940000003	OrthoPerovskite_GdFeO3	-2.1481619999999997	train	-2.081661462783813	-2.121451951906754	Yb	Rh	5.189276	5.630469000000001	7.540717999999999	90.0	90.0	90.0	orthorhombic	orthorhombic	0	0
1897	YbRhO3	681453	Rh	Yb	-1.754359265	OrthoPerovskite_GdFeO3	-1.7659979	train	-1.6769038438796997	-1.7181760517648101			5.663039	5.677616	7.554943	90.0	90.0	90.0	tetragonal	other	4	4
1898	YbRuO3	681902	Ru	Yb	-1.8927003169999999	OrthoPerovskite_GdFeO3	-1.8554296000000001	test	-1.860309600830078	-1.8125482058178055			5.422201	5.806141	7.847772	90.0	90.0	90.0	orthorhombic	other	4	5
1899	YbRuO3	681903	Yb	Ru	-2.246109704	OrthoPerovskite_GdFeO3	-2.1814826000000003	test	-2.189749240875244	-2.1566132738579	Yb	Ru	5.232417	5.585573999999999	7.568611	90.0	90.0	90.0	orthorhombic	orthorhombic	0	0
1900	YbSbO3	682222	Sb	Yb	-2.312444377	OrthoPerovskite_GdFeO3	-2.379557	train	-2.2558295726776123	-2.3656298506506324			5.644172	5.893193	8.329167	90.0	90.0	90.0	orthorhombic	other	2	2
1901	YbSbO3	682223	Yb	Sb	-2.403820973	OrthoPerovskite_GdFeO3	-2.3907458999999998	train	-2.459674596786499	-2.377436856382196	Yb	Sb	5.5431230000000005	5.830321	8.015582	90.0	90.0	90.0	orthorhombic	orthorhombic	0	0
1902	YbScO3	682858	Sc	Yb	-3.1297902389999996	OrthoPerovskite_GdFeO3	-3.0276099999999997	train	-3.14015531539917	-3.0494830878193957			5.688161	5.817238	7.949196000000001	90.0	90.0	90.0	orthorhombic	other	2	3
1903	YbScO3	682859	Yb	Sc	-3.20856661	OrthoPerovskite_GdFeO3	-3.1536806	train	-3.3729782104492188	-3.1825181758782564	Yb	Sc	5.523613	5.756896	7.66219	90.0	90.0	90.0	orthorhombic	orthorhombic	0	0
1904	YbSiO3	682748	Si	Yb	-3.223380127	OrthoPerovskite_GdFeO3	-3.1485252	test	-2.744396686553955	-3.177077977346809			4.871836	4.968662	9.700695	90.0	90.0	90.0	orthorhombic	other	2	0
1905	YbSnO3	682934	Yb	Sn	-2.685742655	OrthoPerovskite_GdFeO3	-2.6202228	train	-2.621129512786865	-2.619590693985684	Yb	Sn	5.456311	5.676666	7.858199000000001	90.0	90.0	90.0	orthorhombic	orthorhombic	0	0
1906	YbSnO3	682935	Sn	Yb	-2.4238768669999997	OrthoPerovskite_GdFeO3	-2.4346392000000003	train	-2.448707103729248	-2.4237549434754126			5.619748	5.643831	8.395112	90.0	90.0	90.0	tetragonal	other	4	4
1907	YbTaO3	681810	Yb	Ta	-3.249150517	OrthoPerovskite_GdFeO3	-3.1254425	train	-3.1602182388305664	-3.1527201252612618	Yb	Ta	5.4100980000000005	5.63949	7.7975699999999994	90.0	90.0	90.0	orthorhombic	orthorhombic	0	1
1908	YbTaO3	681811	Ta	Yb	-2.94336016	OrthoPerovskite_GdFeO3	-3.0117773999999997	train	-2.883144855499268	-3.032775851277326			5.5364260000000005	5.994806	7.745297	90.0	90.0	90.0	orthorhombic	other	4	4
1909	YbTcO3	681614	Yb	Tc	-2.500768878	OrthoPerovskite_GdFeO3	-2.4485855	test	-2.454524040222168	-2.4384716755969005	Yb	Tc	5.261154	5.591703	7.615388	90.0	90.0	90.0	orthorhombic	orthorhombic	0	0
1910	YbTcO3	681615	Tc	Yb	-2.155812275	OrthoPerovskite_GdFeO3	-2.3179262	test	-2.119401216506958	-2.3005943950794046			5.480961	5.8019169999999995	7.834171	90.0	90.0	90.0	orthorhombic	other	4	4
1911	YbTeO3	693069	Yb	Te	-2.16268853	OrthoPerovskite_GdFeO3	-2.1723068	train	-2.299493789672852	-2.1469305773290457	Yb	Te	5.59616	5.927835	8.103206	90.0	90.0	90.0	orthorhombic	orthorhombic	0	0
1912	YbTiO3	682390	Yb	Ti	-3.5283710810000004	OrthoPerovskite_GdFeO3	-3.5661682999999997	train	-3.342382907867432	-3.6177928354158215	Yb	Ti	5.2983	5.448769	7.565772999999999	90.0	90.0	90.0	orthorhombic	orthorhombic	0	0
1913	YbTiO3	682391	Ti	Yb	-3.3188372999999998	OrthoPerovskite_GdFeO3	-3.1631227	train	-3.1947753429412837	-3.192481883554436			5.39343	5.510085	8.595806	90.0	90.0	90.0	orthorhombic	other	4	4
1914	YbTlO3	693538	Yb	Tl	-1.7311774659999999	OrthoPerovskite_GdFeO3	-1.6677393	test	-1.818079113960266	-1.6144893753823681	Yb	Tl	5.602733	5.993893	8.037822	90.0	90.0	90.0	orthorhombic	orthorhombic	0	1
1915	YbVO3	682062	Yb	V	-3.072979304	OrthoPerovskite_GdFeO3	-3.0948431	train	-2.9809513092041016	-3.120430329912082	Yb	V	5.227899	5.406777	7.489889	90.0	90.0	90.0	orthorhombic	orthorhombic	0	0
1916	YbVO3	682063	V	Yb	-2.8578726530000003	OrthoPerovskite_GdFeO3	-2.847688	train	-2.83770489692688	-2.8596216997263264			5.393141	5.431632	8.655831	90.0	90.0	90.0	orthorhombic	other	4	4
1917	YbWO3	681870	Yb	W	-2.73359631	OrthoPerovskite_GdFeO3	-2.6656291000000003	train	-2.7376954555511475	-2.6675053633767	Yb	W	5.326332	5.632605	7.7028929999999995	90.0	90.0	90.0	orthorhombic	orthorhombic	0	1
1918	YbWO3	681871	W	Yb	-2.40589881	OrthoPerovskite_GdFeO3	-2.3535535	train	-2.3705077171325684	-2.3381898455079693			5.312531	6.1091489999999995	7.737289	90.0	90.0	90.0	orthorhombic	other	5	5
1919	YbZnO3	682785	Zn	Yb	-1.939651389	OrthoPerovskite_GdFeO3	-1.9999794999999998	train	-2.0185546875	-1.9650834414349867			5.775532	5.878413	7.058414	90.0	90.0	90.0	orthorhombic	other	0	0
1920	YbZnO3	682786	Yb	Zn	-1.869220186	OrthoPerovskite_GdFeO3	-1.8990778000000001	train	-2.076898097991944	-1.8586076529102344	Yb	Zn	5.258198	5.540868	7.446892999999999	90.0	90.0	90.0	orthorhombic	orthorhombic	1	1
1921	YbZrO3	681900	Yb	Zr	-3.6606365889999997	OrthoPerovskite_GdFeO3	-3.5235004	train	-3.5376315116882324	-3.5727678428022656	Yb	Zr	5.524739	5.755879	7.957623	90.0	90.0	90.0	orthorhombic	orthorhombic	0	1
1922	YbZrO3	681901	Zr	Yb	-3.4554328119999997	OrthoPerovskite_GdFeO3	-3.3716190000000004	train	-3.2729184627532963	-3.4124960948808396			5.558346	5.7263209999999996	8.254332000000002	90.0	90.0	90.0	orthorhombic	other	3	4
1923	ZnBiO3	693229	Bi	Zn	-1.323247568	OrthoPerovskite_GdFeO3	-1.4090708	test	-1.200105905532837	-1.3415313131890159	Bi	Zn	5.38499	5.721389	7.866736	90.0	90.0	90.0	orthorhombic	orthorhombic	0	0
1924	ZnCdO3	693571	Cd	Zn	-0.83247715	OrthoPerovskite_GdFeO3	-0.7757536	train	-1.024647831916809	-0.6732279223017618	Cd	Zn	5.29024	5.522865	7.559661999999999	90.0	90.0	90.0	orthorhombic	orthorhombic	0	3
1925	ZnMoO3	693430	Zn	Mo	-1.745749517	OrthoPerovskite_GdFeO3	-1.8121592	train	-1.5766499042510986	-1.7668874294405843			5.2622860000000005	5.2656220000000005	7.727545	90.0	90.0	90.0	tetragonal	other	0	1
1926	ZnPbO3	682430	Pb	Zn	-1.254800436	OrthoPerovskite_GdFeO3	-1.352992	train	-1.137888789176941	-1.2823545654283548			5.318498	5.541887	8.01304	90.0	90.0	90.0	orthorhombic	other	1	0
1927	ZnPbO3	682431	Zn	Pb	-1.252375662	OrthoPerovskite_GdFeO3	-1.2966917	train	-1.0556046962738037	-1.2229440813960726			5.499412	5.51731	8.060804	90.0	90.0	90.0	tetragonal	other	2	1
1928	ZnReO3	693493	Zn	Re	-1.3921938719999998	OrthoPerovskite_GdFeO3	-1.4606522	train	-1.3554202318191528	-1.395962212155145	Zn	Re	5.144571	5.36205	7.499801	90.0	90.0	90.0	orthorhombic	orthorhombic	1	1
1929	ZnWO3	693130	Zn	W	-1.7002407940000002	OrthoPerovskite_GdFeO3	-1.7467381000000002	train	-1.6353409290313718	-1.6978522872313186			5.267132	5.435494	7.495850999999999	90.0	90.0	90.0	orthorhombic	other	1	0
1930	ZrAgO3	682496	Zr	Ag	-2.118856594	OrthoPerovskite_GdFeO3	-2.1783669999999997	train	-2.1281273365020748	-2.153325559510889			5.175222	5.47126	9.062729	90.0	90.0	90.0	orthorhombic	other	0	1
1931	ZrAgO3	682497	Ag	Zr	-2.098557787	OrthoPerovskite_GdFeO3	-2.2139194	train	-2.033374547958374	-2.190841972256635			5.397584999999999	5.783093	8.052259	90.0	90.0	90.0	orthorhombic	other	1	0
1932	ZrAlO3	693569	Zr	Al	-2.997781335	OrthoPerovskite_GdFeO3	-3.0206828	test	-3.1712353229522705	-3.0421732101635324	Zr	Al	5.159978	5.359611	7.202298	90.0	90.0	90.0	orthorhombic	orthorhombic	0	0
1933	ZrBiO3	693207	Bi	Zr	-2.38753785	OrthoPerovskite_GdFeO3	-2.2618997000000003	test	-2.4873242378234863	-2.2414728365151584	Bi	Zr	4.2111005	5.774491	5.784262	90.0	90.0	90.0	tetragonal	tetragonal	0	2
1934	ZrCdO3	693124	Cd	Zr	-2.634861454	OrthoPerovskite_GdFeO3	-2.6206647999999997	test	-2.508723258972168	-2.6200571112861644	Cd	Zr	5.534128	5.726426999999999	8.050162	90.0	90.0	90.0	orthorhombic	orthorhombic	0	1
1935	ZrHgO3	693125	Hg	Zr	-2.259371686	OrthoPerovskite_GdFeO3	-2.3125887	train	-2.1424670219421387	-2.2949620368411305	Hg	Zr	5.645871	5.793451999999999	8.159585	90.0	90.0	90.0	orthorhombic	orthorhombic	1	1
1936	ZrMnO3	693550	Mn	Zr	-2.9425126539999997	OrthoPerovskite_GdFeO3	-2.8607560000000003	test	-2.802640676498413	-2.873411612130592			5.38324	5.594139	7.903335	90.0	90.0	90.0	orthorhombic	other	0	1
1937	ZrNpO3	681602	Np	Zr	-3.3114356519999997	OrthoPerovskite_GdFeO3	-3.141298	train	-3.2750821113586426	-3.1694515268625647	Np	Zr	5.661862999999999	6.139829	7.850630000000001	90.0	90.0	90.0	orthorhombic	orthorhombic	0	0
1938	ZrNpO3	681603	Zr	Np	-3.13619835	OrthoPerovskite_GdFeO3	-3.113609	train	-3.2130823135375977	-3.140232910045783			6.100137	6.170749	7.511710000000001	90.0	90.0	90.0	orthorhombic	other	1	2
1939	ZrPbO3	682206	Pb	Zr	-2.677868872	OrthoPerovskite_GdFeO3	-2.678953	test	-2.5871269702911377	-2.681565312403574	Pb	Zr	5.80032	5.894608	8.268813	90.0	90.0	90.0	orthorhombic	orthorhombic	0	0
1940	ZrPbO3	682207	Zr	Pb	-2.141818887	OrthoPerovskite_GdFeO3	-2.1552587000000005	test	-1.993651032447815	-2.128940693210654			5.772603	5.777968	8.470927	90.0	90.0	90.0	tetragonal	other	4	5
1941	ZrSnO3	681483	Zr	Sn	-2.366595209	OrthoPerovskite_GdFeO3	-2.4771897999999997	train	-2.4007604122161865	-2.4686561561130715			5.9086620000000005	6.047883000000001	8.446414	90.0	90.0	90.0	orthorhombic	other	4	3
1942	ZrSnO3	681484	Sn	Zr	-2.626537046	OrthoPerovskite_GdFeO3	-2.697202	train	-2.49509859085083	-2.700822437553975			5.806903	5.861701	8.231973	90.0	90.0	90.0	orthorhombic	other	1	2
1943	ZrTlO3	682916	Tl	Zr	-2.360329485	OrthoPerovskite_GdFeO3	-2.4446418	test	-2.5041258335113525	-2.434310114719283	Tl	Zr	5.747555	5.880513	8.208031	90.0	90.0	90.0	orthorhombic	orthorhombic	0	1
1944	ZrTlO3	682917	Zr	Tl	-2.138874426	OrthoPerovskite_GdFeO3	-2.2118267999999994	test	-2.224251747131348	-2.188633771254403			6.0655209999999995	6.09355	8.006662	90.0	90.0	90.0	tetragonal	other	4	4
1945	ZrUO3	682594	U	Zr	-3.181558289	OrthoPerovskite_GdFeO3	-3.099656	train	-3.043907165527344	-3.1255091077977943	U	Zr	5.669137	6.187628	7.8467899999999995	90.0	90.0	90.0	orthorhombic	orthorhombic	0	1
1946	ZrUO3	682595	Zr	U	-3.051601769	OrthoPerovskite_GdFeO3	-3.002104	train	-3.0266990661621094	-3.0225680659504652			6.103307	6.357533	7.481267	90.0	90.0	90.0	orthorhombic	other	2	3
1947	AcAgO3	679988	Ac	Ag	-1.8317740630000001	TetraPerovskite_PbTiO3	-1.8659153000000002	train	-1.8266987800598145	-1.8236131648396456	Ac	Ag	4.104223999999999	4.104223999999999	4.123533	90.0	90.0	90.0	cubic	cubic	3	3
1948	AcAgO3	679989	Ag	Ac	-1.4639243990000002	TetraPerovskite_PbTiO3	-1.4844347	train	-1.4394335746765137	-1.4210585231250288			4.549923000000001	4.549923000000001	4.578774	90.0	90.0	90.0	tetragonal	other	6	6
1949	AcAlO3	679774	Ac	Al	-3.528176783	TetraPerovskite_PbTiO3	-3.491711	train	-3.3946409225463867	-3.5392223085671755	Ac	Al	3.8294639999999998	3.8294639999999998	3.886485	90.0	90.0	90.0	tetragonal	tetragonal	2	1
1950	AcAlO3	679775	Al	Ac	-2.2439825069999997	TetraPerovskite_PbTiO3	-2.3188422	train	-2.6216180324554443	-2.3015609974487274			3.6379129999999997	3.6379129999999997	5.913335	90.0	90.0	90.0	tetragonal	other	5	5
1951	AcAsO3	679810	Ac	As	-2.32454344	TetraPerovskite_PbTiO3	-2.441071	train	-2.3582186698913574	-2.4305420538673435	Ac	As	4.132723	4.132723	4.2504800000000005	90.0	90.0	90.0	tetragonal	tetragonal	3	4
1952	AcAsO3	679811	As	Ac	-1.72089371	TetraPerovskite_PbTiO3	-1.7496770000000001	train	-2.0130014419555664	-1.7009535401824125			3.793448	3.793448	5.7210589999999995	90.0	90.0	90.0	tetragonal	other	6	6
1953	AcAuO3	679887	Ac	Au	-1.758603111	TetraPerovskite_PbTiO3	-1.8690388	train	-1.777422308921814	-1.8269092156044697	Ac	Au	4.1686	4.1686	4.280183999999999	90.0	90.0	90.0	tetragonal	tetragonal	2	2
1954	AcAuO3	679888	Au	Ac	-1.366407291	TetraPerovskite_PbTiO3	-1.4276859	train	-1.327328324317932	-1.3611747627143174			4.502828	4.502828	4.611557	90.0	90.0	90.0	tetragonal	other	6	6
1955	AcBeO3	680441	Ac	Be	-2.710858425	TetraPerovskite_PbTiO3	-2.5290172	test	-3.0460512638092037	-2.5233466447984734	Ac	Be	3.7316290000000003	3.7316290000000003	3.7860980000000004	90.0	90.0	90.0	tetragonal	tetragonal	4	4
1956	AcBiO3	694094	Ac	Bi	-2.32916677	TetraPerovskite_PbTiO3	-2.3814740000000003	test	-2.1134254932403564	-2.3676527510239853			4.203673	4.203673	5.230176999999999	90.0	90.0	90.0	tetragonal	other	2	2
1957	AcCdO3	680334	Ac	Cd	-2.066717455	TetraPerovskite_PbTiO3	-2.106866	test	-2.169130563735962	-2.077874646837383	Ac	Cd	4.179473000000001	4.179473000000001	4.30175	90.0	90.0	90.0	tetragonal	tetragonal	4	4
1958	AcCdO3	680335	Cd	Ac	-1.7897033409999998	TetraPerovskite_PbTiO3	-1.9291589	test	-1.946336030960083	-1.8903505159362477			4.542904	4.542904	4.69238	90.0	90.0	90.0	tetragonal	other	6	6
1959	AcCoO3	679961	Ac	Co	-2.414020445	TetraPerovskite_PbTiO3	-2.3959277	train	-2.441615581512451	-2.382904913322541	Ac	Co	3.8548120000000003	3.8548120000000003	3.96991	90.0	90.0	90.0	tetragonal	tetragonal	2	2
1960	AcCoO3	679962	Co	Ac	-1.6242362209999999	TetraPerovskite_PbTiO3	-1.6054913999999998	train	-1.73846173286438	-1.5488027295031612			4.088238	4.088238	5.264822000000001	90.0	90.0	90.0	tetragonal	other	5	5
1961	AcCrO3	679908	Ac	Cr	-3.118571787	TetraPerovskite_PbTiO3	-3.0628536	train	-2.9503045082092285	-3.086673641600462	Ac	Cr	3.952228	3.95762	3.95762	90.0	90.0	90.0	cubic	cubic	3	3
1962	AcCuO3	680448	Ac	Cu	-2.234682545	TetraPerovskite_PbTiO3	-2.2384473999999996	test	-2.2344326972961426	-2.2167249667050446	Ac	Cu	3.867515	3.867515	3.9231019999999996	90.0	90.0	90.0	tetragonal	tetragonal	3	3
1963	AcCuO3	680449	Cu	Ac	-1.4378820469999998	TetraPerovskite_PbTiO3	-1.4328291000000002	test	-1.5511298179626465	-1.3666020872840772			4.276651	4.276651	4.78207	90.0	90.0	90.0	tetragonal	other	6	6
1964	AcDyO3	693634	Ac	Dy	-3.578905962	TetraPerovskite_PbTiO3	-3.4851644	train	-3.5332825183868413	-3.5323140563062507			4.108967	4.108967	5.047349	90.0	90.0	90.0	tetragonal	other	2	2
1965	AcErO3	680180	Ac	Er	-3.602625335	TetraPerovskite_PbTiO3	-3.5979695	train	-3.667128562927246	-3.651350821515495	Ac	Er	4.15355	4.15355	4.71177	90.0	90.0	90.0	tetragonal	tetragonal	2	0
1966	AcErO3	680181	Er	Ac	-3.1696132710000002	TetraPerovskite_PbTiO3	-3.0843494	train	-3.3816318511962886	-3.1093569289481513			3.836331	3.836331	5.991666	90.0	90.0	90.0	tetragonal	other	6	6
1967	AcEuO3	694109	Ac	Eu	-2.915032213	TetraPerovskite_PbTiO3	-2.8017337	test	-2.874168872833252	-2.811128757302135			4.092294	4.092294	5.387725	90.0	90.0	90.0	tetragonal	other	2	2
1968	AcFeO3	680378	Ac	Fe	-2.705004847	TetraPerovskite_PbTiO3	-2.7376285	test	-2.6321816444396973	-2.7434822090424227	Ac	Fe	3.965047	3.965047	3.9732870000000005	90.0	90.0	90.0	cubic	cubic	3	2
1969	AcFeO3	680379	Fe	Ac	-1.8150600669999999	TetraPerovskite_PbTiO3	-1.7879705000000001	test	-1.9769258499145508	-1.741362478861073			4.084112	4.084112	5.292509	90.0	90.0	90.0	tetragonal	other	6	6
1970	AcGaO3	681286	Ac	Ga	-2.9012471619999998	TetraPerovskite_PbTiO3	-2.9330466	train	-2.900077104568481	-2.949695744488396	Ac	Ga	3.9352730000000005	3.9352730000000005	3.948034	90.0	90.0	90.0	cubic	cubic	3	2
1971	AcGaO3	681287	Ga	Ac	-1.817617866	TetraPerovskite_PbTiO3	-1.7921921000000003	train	-2.2631759643554688	-1.7458172917020471			3.823071	3.823071	5.708262	90.0	90.0	90.0	tetragonal	other	6	6
1972	AcGdO3	693780	Ac	Gd	-3.536921637	TetraPerovskite_PbTiO3	-3.4588556000000006	train	-3.5041580200195312	-3.5045518855485733			4.109209	4.109209	5.189179	90.0	90.0	90.0	tetragonal	other	2	2
1973	AcGeO3	680400	Ac	Ge	-2.491941728	TetraPerovskite_PbTiO3	-2.4116718999999995	test	-2.5414061546325684	-2.3995188664045144	Ac	Ge	4.034004	4.034004	4.056911	90.0	90.0	90.0	tetragonal	tetragonal	4	4
1974	AcGeO3	680401	Ge	Ac	-1.752976986	TetraPerovskite_PbTiO3	-1.8092922999999999	test	-2.0182642936706543	-1.7638621539683017			4.070624	4.070624	5.262681	90.0	90.0	90.0	tetragonal	other	6	6
1975	AcHfO3	680542	Ac	Hf	-3.3833171760000003	TetraPerovskite_PbTiO3	-3.2362354	train	-3.406501054763794	-3.2696335309862796	Ac	Hf	4.135667	4.135667	4.1447330000000004	90.0	90.0	90.0	cubic	cubic	3	3
1976	AcHfO3	680543	Hf	Ac	-2.935089586	TetraPerovskite_PbTiO3	-2.9582523999999997	train	-2.9020583629608154	-2.976293982480394			3.607685	3.607685	6.0314309999999995	90.0	90.0	90.0	tetragonal	other	6	6
1977	AcHgO3	693614	Ac	Hg	-1.736072574	TetraPerovskite_PbTiO3	-1.8620860000000001	test	-1.8651115894317627	-1.8195723237339176	Ac	Hg	4.2285010000000005	4.2285010000000005	4.570296	90.0	90.0	90.0	tetragonal	tetragonal	2	2
[truncated: 6,434 more rows]
