# Supplementary material for: Monitoring the role of site chemistry on the formation energy of perovskites via deep learning analysis of Hirshfeld surfaces
Source: Royal Society of Chemistry journal article supplement (doi:10.1039/d1tc01972d), 2021-01-01
Supplement: d1tc01972d2.csv [file d1tc01972d2.csv]

	formula	ID	A_atom	B_atom	unrelaxed	relaxed	lattice_parameter_unchanged	lattice_grew_over_2_percent	excluded_from_lattice_parameter_dataset	excluded_from_formation_energy_dataset_(prior_exclusion_or_lack_of_converged_energy_calc)
0	Ac2O3	692323	Ac	Ac	5.124096	4.705369	False	False	False	False
1	AcAgO3	351356	Ac	Ag	4.851243	4.123406	False	False	False	False
2	AcAgO3	352371	Ag	Ac	4.851243	4.502205	False	False	False	False
3	AcAlO3	350231	Ac	Al	4.844849	3.858296	False	False	False	False
4	AcAlO3	352192	Al	Ac	4.844849	4.552232	False	False	False	False
5	AcAsO3	350391	Ac	As	4.913889	4.126964	False	False	False	False
6	AcAsO3	352315	As	Ac	4.913889	4.574682	False	False	False	False
7	AcAuO3	350750	Ac	Au	4.8499	4.181841	False	False	False	False
8	AcAuO3	351798	Au	Ac	4.8499	4.50546	False	False	False	False
9	AcBeO3	350757	Be	Ac	4.720787	4.524136	False	False	False	False
10	AcBeO3	353490	Ac	Be	4.720787	3.760912	False	False	False	False
11	AcBiO3	353590	Bi	Ac	5.09798	4.655157	False	False	False	False
12	AcBiO3	354744	Ac	Bi	5.09798	4.461313	False	False	False	False
13	AcBO3	350820	B	Ac	4.714538	4.488354	False	False	False	False
14	AcBO3	354721	Ac	B	4.714538	3.69318	False	False	False	False
15	AcCdO3	352967	Ac	Cd	4.913075	4.186923	False	False	False	False
16	AcCdO3	353867	Cd	Ac	4.913075	4.571171	False	False	False	False
17	AcCeO3	353412	Ce	Ac	5.084902	4.671151	False	False	False	False
18	AcCeO3	353991	Ac	Ce	5.084902	4.581057	False	False	False	False
19	AcCoO3	350267	Co	Ac	4.764579	4.539787	False	False	False	False
20	AcCoO3	351226	Ac	Co	4.764579	3.876344	False	False	False	False
21	AcCrO3	350893	Ac	Cr	4.779658	3.957243	False	False	False	False
22	AcCrO3	352898	Cr	Ac	4.779658	4.53356	False	False	False	False
23	AcCuO3	351412	Cu	Ac	4.775294	4.482774	False	False	False	False
24	AcCuO3	353542	Ac	Cu	4.775294	3.902513	False	False	False	False
25	AcDyO3	351193	Dy	Ac	5.048459	4.65885	False	False	False	False
26	AcDyO3	354304	Ac	Dy	5.048459	4.333278	False	False	False	False
27	AcErO3	352250	Ac	Er	5.036341	4.292573	False	False	False	False
28	AcErO3	353512	Er	Ac	5.036341	4.654586	False	False	False	False
29	AcEuO3	350552	Ac	Eu	5.25641	4.334642	False	False	False	False
30	AcEuO3	354623	Eu	Ac	5.25641	4.596819	False	False	False	False
31	AcFeO3	350871	Fe	Ac	4.775297	4.543918	False	False	False	False
32	AcFeO3	353168	Ac	Fe	4.775297	3.976573	False	False	False	False
33	AcGaO3	351261	Ac	Ga	4.886982	3.949293	False	False	False	False
34	AcGaO3	353728	Ga	Ac	4.886982	4.53212	False	False	False	False
35	AcGdO3	351167	Gd	Ac	5.068178	4.6632	False	False	False	False
36	AcGdO3	355092	Ac	Gd	5.068178	4.38052	False	False	False	False
37	AcGeO3	353278	Ac	Ge	4.929314	4.054808	False	False	False	False
38	AcGeO3	354868	Ge	Ac	4.929314	4.595521	False	False	False	False
39	AcHfO3	351479	Hf	Ac	4.923929	4.621942	False	False	False	False
40	AcHfO3	353955	Ac	Hf	4.923929	4.149205	False	False	False	False
41	AcHgO3	350223	Ac	Hg	4.955932	4.266816	False	False	False	False
42	AcHgO3	350856	Hg	Ac	4.955932	4.56806	False	False	False	False
43	AcHoO3	350538	Ho	Ac	5.042957	4.655635	False	False	False	False
44	AcHoO3	354472	Ac	Ho	5.042957	4.311551	False	False	False	False
45	AcInO3	350665	Ac	In	4.975798	4.186115	False	False	False	False
46	AcInO3	354864	In	Ac	4.975798	4.587201	False	False	False	False
47	AcIrO3	349975	Ir	Ac	4.809698	4.544969	False	False	False	False
48	AcIrO3	353719	Ac	Ir	4.809698	4.053784	False	False	False	False
49	AcLaO3	354179	La	Ac	5.12541	4.686686	False	False	False	False
50	AcLaO3	354430	Ac	La	5.12541	4.561811	False	False	False	False
51	AcLuO3	351959	Lu	Ac	5.02173	4.646245	False	False	False	False
52	AcLuO3	354727	Ac	Lu	5.02173	4.234036	False	False	False	False
53	AcMgO3	350768	Ac	Mg	4.937	3.969512	False	False	False	False
54	AcMgO3	352633	Mg	Ac	4.937	4.580122	False	False	False	False
55	AcMnO3	353436	Ac	Mn	4.782368	3.970968	False	False	False	False
56	AcMnO3	353971	Mn	Ac	4.782368	4.574319	False	False	False	False
57	AcMoO3	352680	Mo	Ac	4.830399	4.567651	False	False	False	False
58	AcMoO3	354983	Ac	Mo	4.830399	4.053805	False	False	False	False
59	AcNbO3	354220	Nb	Ac	4.864578	4.604585	False	False	False	False
60	AcNbO3	355303	Ac	Nb	4.864578	4.113618	False	False	False	False
61	AcNdO3	351703	Ac	Nd	5.082522	4.502784	False	False	False	False
62	AcNdO3	354798	Nd	Ac	5.082522	4.676288	False	False	False	False
63	AcNiO3	354495	Ac	Ni	4.762977	3.892708	False	False	False	False
64	AcNiO3	354841	Ni	Ac	4.762977	4.577977	False	False	False	True
65	AcNpO3	352573	Ac	Np	4.882014	4.496767	False	False	False	False
66	AcNpO3	354587	Np	Ac	4.882014	4.67068	False	False	False	False
67	AcOsO3	352670	Os	Ac	4.807144	4.595023	False	False	False	False
68	AcOsO3	353152	Ac	Os	4.807144	4.035548	False	False	False	False
69	AcPaO3	350989	Ac	Pa	4.960659	4.523907	False	False	False	False
70	AcPaO3	353031	Pa	Ac	4.960659	4.677809	False	False	False	False
71	AcPbO3	350188	Ac	Pb	5.032397	4.291396	False	False	False	False
72	AcPbO3	351375	Pb	Ac	5.032397	4.632596	False	False	False	False
73	AcPdO3	350616	Pd	Ac	4.817658	4.510697	False	False	False	False
74	AcPdO3	354423	Ac	Pd	4.817658	4.060831	False	False	False	False
75	AcPmO3	349984	Ac	Pm	5.069358	4.465921	False	False	False	False
76	AcPmO3	354382	Pm	Ac	5.069358	4.669431	False	False	False	False
77	AcPrO3	351857	Pr	Ac	5.087208	4.683856	False	False	False	False
78	AcPrO3	354998	Ac	Pr	5.087208	4.539094	False	False	False	False
79	AcPtO3	352335	Ac	Pt	4.823302	4.106108	False	False	False	False
80	AcPtO3	353752	Pt	Ac	4.823302	4.523515	False	False	False	False
81	AcPuO3	352648	Pu	Ac	4.898422	4.417928	False	False	False	True
82	AcPuO3	353939	Ac	Pu	4.898422	4.440521	False	False	False	False
83	AcReO3	351189	Ac	Re	4.817777	4.042669	False	False	False	False
84	AcReO3	355292	Re	Ac	4.817777	4.578219	False	False	False	False
85	AcRhO3	353252	Rh	Ac	4.804237	4.532061	False	False	False	False
86	AcRhO3	353656	Ac	Rh	4.804237	4.025439	False	False	False	False
87	AcRuO3	351547	Ac	Ru	4.801319	4.015932	False	False	False	False
88	AcRuO3	354137	Ru	Ac	4.801319	4.550704	False	False	False	False
89	AcSbO3	350489	Sb	Ac	5.031207	4.63683	False	False	False	False
90	AcSbO3	351536	Ac	Sb	5.031207	4.328539	False	False	False	False
91	AcScO3	352788	Sc	Ac	4.960857	4.616165	False	False	False	False
92	AcScO3	354314	Ac	Sc	4.960857	4.093951	False	False	False	False
93	AcSiO3	352697	Ac	Si	4.892825	3.931941	False	False	False	False
94	AcSiO3	354843	Si	Ac	4.892825	4.585138	False	False	False	False
95	AcSmO3	350430	Ac	Sm	5.069836	4.440889	False	False	False	False
96	AcSmO3	352470	Sm	Ac	5.069836	4.665282	False	False	False	False
97	AcSnO3	350246	Sn	Ac	4.988809	4.622309	False	False	False	False
98	AcSnO3	350394	Ac	Sn	4.988809	4.24913	False	False	False	False
99	AcTaO3	351044	Ac	Ta	4.865145	4.090627	False	False	False	False
100	AcTaO3	354938	Ta	Ac	4.865145	4.603934	False	False	False	False
101	AcTbO3	352775	Tb	Ac	5.055114	4.660281	False	False	False	False
102	AcTbO3	353911	Ac	Tb	5.055114	4.356731	False	False	False	False
103	AcTcO3	351346	Ac	Tc	4.809734	4.035153	False	False	False	False
104	AcTcO3	354859	Tc	Ac	4.809734	4.586728	False	False	False	False
105	AcTeO3	351896	Ac	Te	5.080155	4.346491	False	False	False	False
106	AcTeO3	353775	Te	Ac	5.080155	4.636075	False	False	False	False
107	AcThO3	352033	Th	Ac	5.065609	4.663173	False	False	False	False
108	AcThO3	353337	Ac	Th	5.065609	4.599887	False	False	False	False
109	AcTiO3	351397	Ti	Ac	4.857611	4.586324	False	False	False	False
110	AcTiO3	353765	Ac	Ti	4.857611	3.99311	False	False	False	False
111	AcTlO3	350652	Tl	Ac	5.009992	4.577979	False	False	False	False
112	AcTlO3	352283	Ac	Tl	5.009992	4.310083	False	False	False	False
113	AcTmO3	352233	Tm	Ac	5.029241	4.651629	False	False	False	False
114	AcTmO3	353831	Ac	Tm	5.029241	4.269228	False	False	False	False
115	AcUO3	350111	U	Ac	4.904468	4.654237	False	False	False	False
116	AcUO3	353980	Ac	U	4.904468	4.465531	False	False	False	False
117	AcVO3	350395	V	Ac	4.80532	4.647414	False	False	False	False
118	AcVO3	354599	Ac	V	4.80532	3.980712	False	False	False	False
119	AcWO3	353464	W	Ac	4.834207	4.591544	False	False	False	False
120	AcWO3	354834	Ac	W	4.834207	4.05342	False	False	False	False
121	AcYbO3	350318	Ac	Yb	5.172199	4.206637	False	False	False	False
122	AcYbO3	351370	Yb	Ac	5.172199	4.588193	False	False	False	False
123	AcYO3	351800	Ac	Y	5.067666	4.334174	False	False	False	False
124	AcYO3	352031	Y	Ac	5.067666	4.661926	False	False	False	False
125	AcZnO3	354525	Ac	Zn	4.82506	3.965864	False	False	False	False
126	AcZnO3	354940	Zn	Ac	4.82506	4.541286	False	False	False	False
127	AcZrO3	355058	Ac	Zr	4.937841	4.199389	False	False	False	False
128	AcZrO3	355111	Zr	Ac	4.937841	4.626311	False	False	False	False
129	Ag2O3	692331	Ag	Ag	4.543667	4.020452	False	False	False	False
130	AgAsO3	352127	Ag	As	4.614885	3.76856	False	False	False	False
131	AgAsO3	354621	As	Ag	4.614885	3.993163	False	False	False	False
132	AgAuO3	353395	Ag	Au	4.542136	4.045541	False	False	False	False
133	AgAuO3	355248	Au	Ag	4.542136	4.018005	False	False	False	False
134	AgBiO3	351680	Ag	Bi	4.82208	4.17189	False	False	False	False
135	AgBiO3	353875	Bi	Ag	4.82208	4.069218	False	False	False	False
136	AgBO3	350744	Ag	B	4.386826	3.439472	False	False	False	False
137	AgBO3	352341	B	Ag	4.386826	3.958859	False	False	False	False
138	AgGeO3	351107	Ge	Ag	4.632363	3.996613	False	False	False	False
139	AgGeO3	354783	Ag	Ge	4.632363	3.763225	False	False	False	False
140	AgHgO3	351607	Ag	Hg	4.66247	4.15635	False	False	False	False
141	AgHgO3	354608	Hg	Ag	4.66247	4.033528	False	False	False	False
142	AgIrO3	351195	Ir	Ag	4.496218	3.990341	False	False	False	False
143	AgIrO3	352156	Ag	Ir	4.496218	3.898496	False	False	False	False
144	AgMoO3	350041	Mo	Ag	4.519883	3.993934	False	False	False	False
145	AgMoO3	350337	Ag	Mo	4.519883	3.910818	False	False	False	False
146	AgOsO3	353755	Os	Ag	4.493295	4.004943	False	False	False	False
147	AgOsO3	354343	Ag	Os	4.493295	3.877586	False	False	False	False
148	AgPbO3	353272	Ag	Pb	4.748602	4.232845	False	False	False	False
149	AgPbO3	353672	Pb	Ag	4.748602	4.07195	False	False	False	False
150	AgPdO3	350066	Pd	Ag	4.505323	3.990102	False	False	False	False
151	AgPdO3	352220	Ag	Pd	4.505323	3.941111	False	False	False	False
152	AgPtO3	350583	Ag	Pt	4.511774	3.964977	False	False	False	False
153	AgPtO3	355001	Pt	Ag	4.511774	4.003673	False	False	False	False
154	AgRhO3	350554	Ag	Rh	4.489966	3.90495	False	False	False	False
155	AgRhO3	353578	Rh	Ag	4.489966	3.992694	False	False	False	False
156	AgRuO3	350072	Ag	Ru	4.486626	3.8675	False	False	False	False
157	AgRuO3	351722	Ru	Ag	4.486626	3.99549	False	False	False	False
158	AgSbO3	350004	Sb	Ag	4.747265	4.045184	False	False	False	False
159	AgSbO3	353975	Ag	Sb	4.747265	3.9527	False	False	False	False
160	AgSnO3	352668	Ag	Sn	4.699567	4.048334	False	False	False	False
161	AgSnO3	354485	Sn	Ag	4.699567	4.044649	False	False	False	False
162	AgTeO3	354202	Ag	Te	4.802144	4.046238	False	False	False	False
163	AgTeO3	354606	Te	Ag	4.802144	4.05787	False	False	False	False
164	AgWO3	351312	W	Ag	4.524232	3.993413	False	False	False	False
165	AgWO3	352802	Ag	W	4.524232	3.917047	False	False	False	False
166	Al2O3	353709	Al	Al	4.52906	3.590595	False	False	False	False
167	AlAgO3	354309	Ag	Al	4.536375	3.710424	False	False	False	False
168	AlAgO3	354491	Al	Ag	4.536375	3.96507	False	False	False	False
169	AlAsO3	350301	As	Al	4.607818	3.652583	False	False	False	False
170	AlAsO3	351015	Al	As	4.607818	3.813917	False	False	False	False
171	AlAuO3	350708	Al	Au	4.53484	4.025028	False	False	False	False
172	AlAuO3	353381	Au	Al	4.53484	3.716196	False	False	False	False
173	AlBiO3	350716	Al	Bi	4.815608	4.221815	False	False	False	False
174	AlBiO3	353428	Bi	Al	4.815608	3.76383	False	False	False	False
175	AlBO3	351902	B	Al	4.379002	3.610164	False	False	False	False
176	AlBO3	353507	Al	B	4.379002	3.283271	False	False	False	False
177	AlCdO3	353122	Al	Cd	4.606892	4.052878	False	False	False	False
178	AlCdO3	353414	Cd	Al	4.606892	3.714583	False	False	False	False
179	AlCoO3	352198	Al	Co	4.436856	3.60549	False	False	False	False
180	AlCoO3	354780	Co	Al	4.436856	3.632597	False	False	False	False
181	AlCrO3	351212	Al	Cr	4.454231	3.744911	False	False	False	False
182	AlCrO3	355152	Cr	Al	4.454231	3.637581	False	False	False	False
183	AlCuO3	351685	Al	Cu	4.449206	3.640774	False	False	False	False
184	AlCuO3	354713	Cu	Al	4.449206	3.640198	False	False	False	False
185	AlFeO3	350355	Al	Fe	4.44921	3.744004	False	False	False	False
186	AlFeO3	352799	Fe	Al	4.44921	3.615447	False	False	False	False
187	AlGaO3	351348	Al	Ga	4.577182	3.740276	False	False	False	False
188	AlGaO3	351357	Ga	Al	4.577182	3.638433	False	False	False	False
189	AlGeO3	354177	Al	Ge	4.625349	3.710088	False	False	False	False
190	AlGeO3	354872	Ge	Al	4.625349	3.695267	False	False	False	False
191	AlHgO3	350518	Al	Hg	4.655546	4.127058	False	False	False	False
192	AlHgO3	352823	Hg	Al	4.655546	3.755212	False	False	False	False
193	AlInO3	350625	In	Al	4.67804	3.684836	False	False	False	False
194	AlInO3	354977	Al	In	4.67804	4.059103	False	False	False	False
195	AlIrO3	351772	Ir	Al	4.488771	3.634553	False	False	False	False
196	AlIrO3	352742	Al	Ir	4.488771	3.901445	False	False	False	False
197	AlMoO3	353743	Mo	Al	4.512515	3.645865	False	False	False	False
198	AlMoO3	354111	Al	Mo	4.512515	3.93496	False	False	False	False
199	AlNiO3	350096	Al	Ni	4.435008	3.61267	False	False	False	False
200	AlNiO3	351115	Ni	Al	4.435008	3.608085	False	False	False	False
201	AlOsO3	353987	Os	Al	4.485838	3.664692	False	False	False	False
202	AlOsO3	354576	Al	Os	4.485838	3.895758	False	False	False	False
203	AlPbO3	353438	Al	Pb	4.741928	4.193292	False	False	False	False
204	AlPbO3	354021	Pb	Al	4.741928	3.784028	False	False	False	False
205	AlPdO3	350813	Al	Pd	4.497906	3.897353	False	False	False	False
206	AlPdO3	351110	Pd	Al	4.497906	3.662056	False	False	False	False
207	AlPtO3	350209	Pt	Al	4.504379	3.671185	False	False	False	False
208	AlPtO3	353219	Al	Pt	4.504379	3.944959	False	False	False	False
209	AlReO3	351059	Re	Al	4.498043	3.661394	False	False	False	False
210	AlReO3	354266	Al	Re	4.498043	3.911741	False	False	False	False
211	AlRhO3	350174	Al	Rh	4.482499	3.872455	False	False	False	False
212	AlRhO3	354515	Rh	Al	4.482499	3.653436	False	False	False	False
213	AlRuO3	351113	Ru	Al	4.479148	3.673314	False	False	False	False
214	AlRuO3	353606	Al	Ru	4.479148	3.870441	False	False	False	False
215	AlSbO3	351306	Al	Sb	4.740587	4.019004	False	False	False	False
216	AlSbO3	354552	Sb	Al	4.740587	3.723617	False	False	False	False
217	AlSiO3	350379	Si	Al	4.58384	3.638442	False	False	False	False
218	AlSiO3	353071	Al	Si	4.58384	3.529552	False	False	False	False
219	AlSnO3	352154	Al	Sn	4.692752	4.006111	False	False	False	False
220	AlSnO3	355205	Sn	Al	4.692752	3.715413	False	False	False	False
221	AlTcO3	350018	Tc	Al	4.488812	3.661909	False	False	False	False
222	AlTcO3	352860	Al	Tc	4.488812	3.890435	False	False	False	False
223	AlTeO3	351151	Te	Al	4.795618	3.745357	False	False	False	False
224	AlTeO3	353961	Al	Te	4.795618	4.106699	False	False	False	False
225	AlTlO3	352618	Al	Tl	4.716672	4.171951	False	False	False	False
226	AlTlO3	354770	Tl	Al	4.716672	3.748056	False	False	False	False
227	AlVO3	353374	V	Al	4.483744	3.612454	False	False	False	False
228	AlVO3	354032	Al	V	4.483744	3.776484	False	False	False	False
229	AlWO3	350446	W	Al	4.516877	3.645792	False	False	False	False
230	AlWO3	350792	Al	W	4.516877	3.941063	False	False	False	False
231	AlZnO3	351039	Al	Zn	4.506396	3.732302	False	False	False	False
232	AlZnO3	352736	Zn	Al	4.506396	3.642095	False	False	False	False
233	As2O3	353027	As	As	4.683971	3.854402	False	False	False	False
234	AsAuO3	350307	Au	As	4.613401	3.803181	False	False	False	False
235	AsAuO3	350336	As	Au	4.613401	4.040892	False	False	False	False
236	AsIrO3	351297	Ir	As	4.568911	3.824584	False	False	False	False
237	AsIrO3	355004	As	Ir	4.568911	3.907182	False	False	False	False
238	AsOsO3	350627	As	Os	4.566081	3.901362	False	False	False	False
239	AsOsO3	353202	Os	As	4.566081	3.871103	False	False	False	False
240	AsPbO3	353285	Pb	As	4.813931	3.966744	False	False	False	False
241	AsPbO3	355122	As	Pb	4.813931	4.205613	False	False	False	False
242	AsPdO3	352682	Pd	As	4.57773	3.766905	False	False	False	False
243	AsPdO3	352919	As	Pd	4.57773	3.924439	False	False	False	False
244	AsPtO3	353573	As	Pt	4.583979	3.956424	False	False	False	False
245	AsPtO3	354909	Pt	As	4.583979	3.807043	False	False	False	False
246	AsRhO3	350544	Rh	As	4.562858	3.792021	False	False	False	False
247	AsRhO3	354592	As	Rh	4.562858	3.887133	False	False	False	False
248	AsRuO3	349997	Ru	As	4.559623	3.83313	False	False	False	False
249	AsRuO3	351140	As	Ru	4.559623	3.88459	False	False	False	False
250	AsWO3	351146	W	As	4.596049	3.903159	False	False	False	False
251	AsWO3	353522	As	W	4.596049	3.935276	False	False	False	False
252	Au2O3	354416	Au	Au	4.540604	4.050451	False	False	False	False
253	B2O3	350191	B	B	4.217888	3.230137	False	False	False	False
254	Ba2O3	351720	Ba	Ba	5.713964	4.657742	False	False	False	False
255	BaAcO3	350983	Ac	Ba	5.435035	4.68979	False	False	False	False
256	BaAcO3	354147	Ba	Ac	5.435035	4.671467	False	False	False	False
257	BaAgO3	352396	Ag	Ba	5.194725	4.5159	False	False	False	False
258	BaAgO3	353814	Ba	Ag	5.194725	4.159934	False	False	False	False
259	BaAlO3	353270	Al	Ba	5.189149	4.561082	False	False	False	False
260	BaAlO3	353425	Ba	Al	5.189149	3.921036	False	False	False	False
261	BaAsO3	354096	As	Ba	5.249489	4.593183	False	False	False	False
262	BaAsO3	354345	Ba	As	5.249489	4.041245	False	False	False	False
263	BaAuO3	350741	Ba	Au	5.193554	4.175357	False	False	False	False
264	BaAuO3	351490	Au	Ba	5.193554	4.534128	False	False	False	False
265	BaBeO3	351529	Ba	Be	5.081534	3.829341	False	False	False	False
266	BaBeO3	353762	Be	Ba	5.081534	4.531104	False	False	False	False
267	BaBiO3	350940	Ba	Bi	5.411841	4.381283	False	False	False	False
268	BaBiO3	353161	Bi	Ba	5.411841	4.647243	False	False	False	False
269	BaBO3	350118	Ba	B	5.076142	3.729542	False	False	False	False
270	BaBO3	354866	B	Ba	5.076142	4.528295	False	False	False	False
271	BaCaO3	354422	Ca	Ba	5.499501	4.590031	False	False	False	False
272	BaCaO3	354524	Ba	Ca	5.499501	4.382086	False	False	False	False
273	BaCdO3	350891	Ba	Cd	5.248776	4.241644	False	False	False	False
274	BaCdO3	351322	Cd	Ba	5.248776	4.57375	False	False	False	False
275	BaCeO3	352801	Ba	Ce	5.400241	4.580861	False	False	False	False
276	BaCeO3	353866	Ce	Ba	5.400241	4.670144	False	False	False	False
277	BaCoO3	352636	Co	Ba	5.119398	4.508027	False	False	False	False
278	BaCoO3	353902	Ba	Co	5.119398	3.94574	False	False	False	False
279	BaCrO3	350766	Cr	Ba	5.132467	4.531282	False	False	False	False
280	BaCrO3	352054	Ba	Cr	5.132467	3.959595	False	False	False	False
281	BaCuO3	353853	Cu	Ba	5.128683	4.483315	False	False	False	False
282	BaCuO3	354953	Ba	Cu	5.128683	3.969383	False	False	False	False
283	BaDyO3	353320	Dy	Ba	5.367968	4.639109	False	False	False	False
284	BaDyO3	353523	Ba	Dy	5.367968	4.385211	False	False	False	False
285	BaErO3	353274	Er	Ba	5.357254	4.634125	False	False	False	False
286	BaErO3	354310	Ba	Er	5.357254	4.356852	False	False	False	False
287	BaEuO3	353463	Ba	Eu	5.553121	4.340831	False	False	False	False
288	BaEuO3	354492	Eu	Ba	5.553121	4.574685	False	False	False	False
289	BaFeO3	352072	Ba	Fe	5.128686	3.973428	False	False	False	False
290	BaFeO3	352604	Fe	Ba	5.128686	6.160718	False	True	True	True
291	BaGaO3	350030	Ba	Ga	5.225936	4.023408	False	False	False	False
292	BaGaO3	354299	Ga	Ba	5.225936	4.57134	False	False	False	False
293	BaGdO3	350471	Ba	Gd	5.385421	4.420777	False	False	False	False
294	BaGdO3	352423	Gd	Ba	5.385421	4.643746	False	False	False	False
295	BaGeO3	351170	Ge	Ba	5.263013	4.583747	False	False	False	False
296	BaGeO3	351192	Ba	Ge	5.263013	3.949269	False	False	False	False
297	BaHfO3	350195	Hf	Ba	5.25829	4.605626	False	False	False	False
298	BaHfO3	350930	Ba	Hf	5.25829	4.174498	False	False	False	False
299	BaHgO3	350465	Ba	Hg	5.286385	4.266226	False	False	False	False
300	BaHgO3	351492	Hg	Ba	5.286385	4.564626	False	False	False	False
301	BaHoO3	354647	Ho	Ba	5.363102	4.637703	False	False	False	False
302	BaHoO3	354848	Ba	Ho	5.363102	4.370591	False	False	False	False
303	BaInO3	349981	Ba	In	5.303857	4.240266	False	False	False	False
304	BaInO3	350606	In	Ba	5.303857	4.58401	False	False	False	False
305	BaIrO3	353341	Ba	Ir	5.15855	4.048031	False	False	False	False
306	BaIrO3	354509	Ir	Ba	5.15855	4.560354	False	False	False	False
307	BaLaO3	350920	La	Ba	5.436203	4.657837	False	False	False	False
308	BaLaO3	352595	Ba	La	5.436203	4.54432	False	False	False	False
309	BaLiO3	352150	Li	Ba	5.25003	4.522109	False	False	False	False
310	BaLiO3	354577	Ba	Li	5.25003	3.965403	False	False	False	False
311	BaLuO3	350351	Lu	Ba	5.344347	4.629728	False	False	False	False
312	BaLuO3	351253	Ba	Lu	5.344347	4.309283	False	False	False	False
313	BaMgO3	351577	Ba	Mg	5.269757	4.069931	False	False	False	False
314	BaMgO3	352760	Mg	Ba	5.269757	4.56714	False	False	False	False
315	BaMnO3	350513	Ba	Mn	5.134817	3.982018	False	False	False	False
316	BaMnO3	353373	Mn	Ba	5.134817	4.56491	False	False	False	False
317	BaMoO3	352904	Ba	Mo	5.176561	4.056331	False	False	False	False
318	BaMoO3	353778	Mo	Ba	5.176561	4.571079	False	False	False	False
319	BaNaO3	350954	Ba	Na	5.456198	4.228327	False	False	False	False
320	BaNaO3	353546	Na	Ba	5.456198	4.567738	False	False	False	False
321	BaNbO3	692332	Ba	Nb	5.20636	4.124632	False	False	False	False
322	BaNbO3	692335	Nb	Ba	5.20636	4.57104	False	False	False	False
323	BaNdO3	352808	Ba	Nd	5.39813	4.524386	False	False	False	False
324	BaNdO3	354885	Nd	Ba	5.39813	4.659343	False	False	False	False
325	BaNiO3	352792	Ni	Ba	5.11801	4.384266	False	False	False	True
326	BaNiO3	354558	Ba	Ni	5.11801	3.98316	False	False	False	False
327	BaNpO3	351471	Np	Ba	5.221592	4.65011	False	False	False	False
328	BaNpO3	354133	Ba	Np	5.221592	4.458946	False	False	False	False
329	BaOsO3	352905	Ba	Os	5.15633	4.034055	False	False	False	False
330	BaOsO3	355158	Os	Ba	5.15633	4.577065	False	False	False	False
331	BaPaO3	350623	Pa	Ba	5.29054	4.633235	False	False	False	False
332	BaPaO3	355168	Ba	Pa	5.29054	4.540452	False	False	False	False
333	BaPbO3	692333	Ba	Pb	5.353769	4.320097	False	False	False	False
334	BaPbO3	692336	Pb	Ba	5.353769	4.618083	False	False	False	False
335	BaPdO3	350812	Ba	Pd	5.165472	4.084729	False	False	False	False
336	BaPdO3	353641	Pd	Ba	5.165472	4.542285	False	False	False	False
337	BaPmO3	353158	Ba	Pm	5.386466	4.496334	False	False	False	False
338	BaPmO3	353591	Pm	Ba	5.386466	4.65477	False	False	False	False
339	BaPrO3	692334	Ba	Pr	5.402285	4.550787	False	False	False	False
340	BaPtO3	351684	Pt	Ba	5.170383	4.539268	False	False	False	False
341	BaPtO3	354412	Ba	Pt	5.170383	4.10141	False	False	False	False
342	BaPuO3	351315	Pu	Ba	5.235945	4.616926	False	False	False	False
343	BaPuO3	352211	Ba	Pu	5.235945	4.436817	False	False	False	False
344	BaReO3	352776	Ba	Re	5.165576	4.03788	False	False	False	False
345	BaReO3	353524	Re	Ba	5.165576	4.57153	False	False	False	False
346	BaRhO3	351180	Rh	Ba	5.153804	4.548662	False	False	False	False
347	BaRhO3	351918	Ba	Rh	5.153804	4.051001	False	False	False	False
348	BaRuO3	351592	Ru	Ba	5.151269	4.576388	False	False	False	False
349	BaRuO3	352773	Ba	Ru	5.151269	4.036102	False	False	False	False
350	BaSbO3	351546	Sb	Ba	5.352717	4.632503	False	False	False	False
351	BaSbO3	353455	Ba	Sb	5.352717	4.244435	False	False	False	False
352	BaScO3	350569	Ba	Sc	5.290714	4.17934	False	False	False	False
353	BaScO3	352977	Sc	Ba	5.290714	4.600745	False	False	False	False
354	BaSiO3	350074	Ba	Si	5.231047	3.812635	False	False	False	False
355	BaSiO3	351514	Si	Ba	5.231047	4.576552	False	False	False	False
356	BaSmO3	350108	Sm	Ba	5.38689	4.652461	False	False	False	False
357	BaSmO3	354376	Ba	Sm	5.38689	4.475869	False	False	False	False
358	BaSnO3	352325	Sn	Ba	5.315314	4.608832	False	False	False	False
359	BaSnO3	352504	Ba	Sn	5.315314	4.154214	False	False	False	False
360	BAsO3	351430	B	As	4.463098	3.658147	False	False	False	False
361	BAsO3	353123	As	B	4.463098	3.377491	False	False	False	False
362	BaSrO3	351883	Sr	Ba	5.627576	4.620257	False	False	False	False
363	BaSrO3	352723	Ba	Sr	5.627576	4.530171	False	False	False	False
364	BaTaO3	350886	Ba	Ta	5.206855	4.103934	False	False	False	False
365	BaTaO3	352432	Ta	Ba	5.206855	4.581924	False	False	False	False
366	BaTbO3	350334	Tb	Ba	5.373856	4.643322	False	False	False	False
367	BaTbO3	350842	Ba	Tb	5.373856	4.400668	False	False	False	False
368	BaTcO3	350266	Ba	Tc	5.158581	4.029412	False	False	False	False
369	BaTcO3	355301	Tc	Ba	5.158581	4.57696	False	False	False	False
370	BaTeO3	351560	Ba	Te	5.396032	4.305373	False	False	False	False
371	BaTeO3	353226	Te	Ba	5.396032	4.654219	False	False	False	False
372	BaThO3	350534	Ba	Th	5.383145	4.611252	False	False	False	False
373	BaThO3	354797	Th	Ba	5.383145	4.664433	False	False	False	False
374	BaTiO3	352611	Ba	Ti	5.20028	4.006171	False	False	False	False
375	BaTlO3	353804	Ba	Tl	5.333988	4.3103	False	False	False	False
376	BaTlO3	353973	Tl	Ba	5.333988	4.603798	False	False	False	False
377	BaTmO3	351739	Ba	Tm	5.350981	4.336362	False	False	False	False
378	BaTmO3	353330	Tm	Ba	5.350981	4.628942	False	False	False	False
379	BaUO3	350116	U	Ba	5.241238	4.662486	False	False	False	False
380	BaUO3	352565	Ba	U	5.241238	4.483261	False	False	False	False
381	BAuO3	354478	B	Au	4.385184	3.982906	False	False	False	False
382	BAuO3	354573	Au	B	4.385184	3.465029	False	False	False	False
383	BaVO3	350996	V	Ba	5.154745	5.156327	False	False	False	True
384	BaVO3	353906	Ba	V	5.154745	3.965798	False	False	False	False
385	BaWO3	351199	W	Ba	5.179877	4.571649	False	False	False	False
386	BaWO3	354609	Ba	W	5.179877	4.058712	False	False	False	False
387	BaYbO3	352575	Yb	Ba	5.477855	4.561491	False	False	False	False
388	BaYbO3	355126	Ba	Yb	5.477855	4.293128	False	False	False	False
389	BaYO3	353165	Y	Ba	5.384967	4.646816	False	False	False	False
390	BaYO3	354518	Ba	Y	5.384967	4.403662	False	False	False	False
391	BaZnO3	352458	Ba	Zn	5.171913	4.038906	False	False	False	False
392	BaZnO3	353198	Zn	Ba	5.171913	4.546726	False	False	False	False
393	BaZrO3	351177	Ba	Zr	5.270495	4.224868	False	False	False	False
394	BaZrO3	351765	Zr	Ba	5.270495	4.609697	False	False	False	False
395	Be2O3	352803	Be	Be	4.233467	3.342746	False	False	False	False
396	BeAgO3	352596	Ag	Be	4.394041	3.527796	False	False	False	False
397	BeAgO3	353673	Be	Ag	4.394041	3.929595	False	False	False	False
398	BeAlO3	351818	Al	Be	4.386244	3.364944	False	False	False	False
399	BeAlO3	353345	Be	Al	4.386244	3.582652	False	False	False	False
400	BeAsO3	350795	Be	As	4.470069	3.710982	False	False	False	False
401	BeAsO3	354884	As	Be	4.470069	3.477032	False	False	False	False
402	BeAuO3	350200	Au	Be	4.392405	3.533792	False	False	False	False
403	BeAuO3	355169	Be	Au	4.392405	3.966718	False	False	False	False
404	BeBiO3	352656	Bi	Be	4.689974	3.635989	False	False	False	False
405	BeBiO3	353683	Be	Bi	4.689974	4.169954	False	False	False	False
406	BeBO3	350383	B	Be	4.225692	3.337609	False	False	False	False
407	BeBO3	353563	Be	B	4.225692	3.234896	False	False	False	False
408	BeCdO3	351661	Cd	Be	4.469086	3.560279	False	False	False	False
409	BeCdO3	351847	Be	Cd	4.469086	4.016572	False	False	False	False
410	BeCoO3	351369	Be	Co	4.287729	3.593888	False	False	False	False
411	BeCoO3	353089	Co	Be	4.287729	3.433479	False	False	False	False
412	BeCrO3	350969	Be	Cr	4.306326	3.689068	False	False	False	False
413	BeCrO3	351504	Cr	Be	4.306326	3.423778	False	False	False	False
414	BeCuO3	352660	Be	Cu	4.300949	3.619571	False	False	False	False
415	BeCuO3	355069	Cu	Be	4.300949	3.394435	False	False	False	False
416	BeFeO3	353229	Fe	Be	4.300953	4.319219	False	False	False	False
417	BeFeO3	353930	Be	Fe	4.300953	3.667999	False	False	False	False
418	BeGaO3	350382	Ga	Be	4.437495	3.424578	False	False	False	False
419	BeGaO3	353016	Be	Ga	4.437495	3.738282	False	False	False	False
420	BeGeO3	350392	Ge	Be	4.488691	3.456849	False	False	False	False
421	BeGeO3	351602	Be	Ge	4.488691	3.641248	False	False	False	False
422	BeHgO3	351243	Be	Hg	4.520736	4.072669	False	False	False	False
423	BeHgO3	353367	Hg	Be	4.520736	3.60494	False	False	False	False
424	BeInO3	354193	Be	In	4.544581	4.039966	False	False	False	False
425	BeInO3	354825	In	Be	4.544581	3.518675	False	False	False	False
426	BeIrO3	352089	Be	Ir	4.343249	3.850187	False	False	False	False
427	BeIrO3	354208	Ir	Be	4.343249	3.431219	False	False	False	False
428	BeMoO3	351272	Be	Mo	4.368596	3.873305	False	False	False	False
429	BeMoO3	354701	Mo	Be	4.368596	3.40964	False	False	False	False
430	BeNbO3	351347	Be	Nb	4.41028	3.964679	False	False	False	False
431	BeNbO3	354613	Nb	Be	4.41028	3.405485	False	False	False	False
432	BeNiO3	351474	Ni	Be	4.28575	5.08474	False	True	True	True
433	BeNiO3	354377	Be	Ni	4.28575	3.593857	False	False	False	False
434	BeOsO3	350631	Be	Os	4.340116	3.839709	False	False	False	False
435	BeOsO3	354294	Os	Be	4.340116	3.408489	False	False	False	False
436	BePbO3	351562	Be	Pb	4.612194	4.130176	False	False	False	False
437	BePbO3	354330	Pb	Be	4.612194	3.609418	False	False	False	False
438	BePdO3	352635	Pd	Be	4.353004	3.460558	False	False	False	False
439	BePdO3	354854	Be	Pd	4.353004	3.855827	False	False	False	False
440	BePtO3	354300	Be	Pt	4.359915	3.890968	False	False	False	False
441	BePtO3	355019	Pt	Be	4.359915	3.468883	False	False	False	False
442	BeReO3	352098	Be	Re	4.35315	3.851049	False	False	False	False
443	BeReO3	353209	Re	Be	4.35315	3.404139	False	False	False	False
444	BeRhO3	351572	Rh	Be	4.336549	3.421663	False	False	False	False
445	BeRhO3	352608	Be	Rh	4.336549	3.832063	False	False	False	False
446	BeRuO3	351528	Be	Ru	4.332967	3.828046	False	False	False	False
447	BeRuO3	354791	Ru	Be	4.332967	3.39882	False	False	False	False
448	BeSbO3	351535	Sb	Be	4.610777	3.53279	False	False	False	False
449	BeSbO3	352882	Be	Sb	4.610777	3.947421	False	False	False	False
450	BeSiO3	350447	Be	Si	4.444579	3.446066	False	False	False	False
451	BeSiO3	350555	Si	Be	4.444579	3.381735	False	False	False	False
452	BeSnO3	352081	Sn	Be	4.560165	3.510281	False	False	False	False
453	BeSnO3	352543	Be	Sn	4.560165	3.968179	False	False	False	False
454	BeTcO3	351928	Tc	Be	4.343292	3.416463	False	False	False	False
455	BeTcO3	352263	Be	Tc	4.343292	3.834909	False	False	False	False
456	BeTeO3	350562	Te	Be	4.668891	3.526405	False	False	False	False
457	BeTeO3	354964	Be	Te	4.668891	4.047508	False	False	False	False
458	BeTlO3	350196	Be	Tl	4.585485	4.122692	False	False	False	False
459	BeTlO3	355220	Tl	Be	4.585485	3.598577	False	False	False	False
460	BeVO3	351446	Be	V	4.337879	3.705516	False	False	False	False
461	BeVO3	353265	V	Be	4.337879	3.39456	False	False	False	False
462	BeWO3	354319	Be	W	4.373251	3.88165	False	False	False	False
463	BeWO3	354408	W	Be	4.373251	3.403112	False	False	False	False
464	BeZnO3	350580	Be	Zn	4.362067	3.71689	False	False	False	False
465	BeZnO3	351569	Zn	Be	4.362067	3.444863	False	False	False	False
466	Bi2O3	355217	Bi	Bi	5.071594	4.346876	False	False	False	False
467	BiAsO3	350641	As	Bi	4.885471	4.231445	False	False	False	False
468	BiAsO3	351452	Bi	As	4.885471	4.019386	False	False	False	False
469	BiAuO3	354307	Bi	Au	4.820721	4.128576	False	False	False	False
470	BiAuO3	354427	Au	Bi	4.820721	4.186263	False	False	False	False
471	BiBO3	354059	B	Bi	4.683642	4.139003	False	False	False	False
472	BiBO3	355209	Bi	B	4.683642	3.556217	False	False	False	False
473	BiIrO3	351449	Ir	Bi	4.780024	4.203512	False	False	False	False
474	BiIrO3	354630	Bi	Ir	4.780024	3.995362	False	False	False	False
475	BiMoO3	351931	Mo	Bi	4.800981	4.244615	False	False	False	False
476	BiMoO3	352168	Bi	Mo	4.800981	4.015343	False	False	False	False
477	BiOsO3	351679	Bi	Os	4.777438	3.989839	False	False	False	False
478	BiOsO3	354832	Os	Bi	4.777438	4.234208	False	False	False	False
479	BiPbO3	352111	Bi	Pb	5.005313	4.323746	False	False	False	False
480	BiPbO3	353617	Pb	Bi	5.005313	4.218377	False	False	False	False
481	BiPdO3	351040	Bi	Pd	4.788083	4.004045	False	False	False	False
482	BiPdO3	351207	Pd	Bi	4.788083	4.170619	False	False	False	False
483	BiPtO3	350039	Pt	Bi	4.793796	4.178299	False	False	False	False
484	BiPtO3	355198	Bi	Pt	4.793796	4.048631	False	False	False	False
485	BiRhO3	354068	Bi	Rh	4.774494	3.971763	False	False	False	False
486	BiRhO3	355212	Rh	Bi	4.774494	4.195132	False	False	False	False
487	BIrO3	352372	Ir	B	4.335863	3.39203	False	False	False	False
488	BIrO3	354712	B	Ir	4.335863	3.842161	False	False	False	False
489	BiRuO3	351751	Bi	Ru	4.771541	3.969147	False	False	False	False
490	BiRuO3	353290	Ru	Bi	4.771541	4.219667	False	False	False	False
491	BiSbO3	351747	Sb	Bi	5.00411	4.317156	False	False	False	False
492	BiSbO3	354200	Bi	Sb	5.00411	4.185487	False	False	False	False
493	BiTeO3	352102	Bi	Te	5.053582	4.24938	False	False	False	False
494	BiTeO3	354675	Te	Bi	5.053582	4.308092	False	False	False	False
495	BiWO3	350092	W	Bi	4.804836	4.239051	False	False	False	False
496	BiWO3	352161	Bi	W	4.804836	4.019408	False	False	False	False
497	BMoO3	351461	B	Mo	4.361296	3.87399	False	False	False	False
498	BMoO3	353998	Mo	B	4.361296	3.394911	False	False	False	False
499	BOsO3	350158	B	Os	4.33272	3.828933	False	False	False	False
500	BOsO3	351389	Os	B	4.33272	3.381867	False	False	False	False
501	BPbO3	350403	B	Pb	4.605646	4.201451	False	False	False	False
502	BPbO3	352194	Pb	B	4.605646	3.531834	False	False	False	False
503	BPdO3	351845	Pd	B	4.345652	3.394234	False	False	False	False
504	BPdO3	352782	B	Pd	4.345652	3.868492	False	False	False	False
505	BPtO3	350192	Pt	B	4.352585	3.419901	False	False	False	False
506	BPtO3	354182	B	Pt	4.352585	3.891931	False	False	False	False
507	BRhO3	351531	B	Rh	4.32914	3.833862	False	False	False	False
508	BRhO3	354054	Rh	B	4.32914	3.367273	False	False	False	False
509	BRuO3	351074	Ru	B	4.325546	3.356422	False	False	False	False
510	BRuO3	352691	B	Ru	4.325546	3.816642	False	False	False	False
511	BSbO3	351589	Sb	B	4.604225	3.491168	False	False	False	False
512	BSbO3	355093	B	Sb	4.604225	3.90594	False	False	False	False
513	BTeO3	352453	B	Te	4.662502	4.014047	False	False	False	False
514	BTeO3	353061	Te	B	4.662502	3.514613	False	False	False	False
515	BWO3	353154	B	W	4.365966	3.880077	False	False	False	False
516	BWO3	354532	W	B	4.365966	3.400556	False	False	False	False
517	Ca2O3	350810	Ca	Ca	5.266862	4.218858	False	False	False	True
518	CaAcO3	353093	Ca	Ac	5.19646	4.611589	False	False	False	False
519	CaAcO3	353482	Ac	Ca	5.19646	4.245836	False	False	False	False
520	CaAgO3	350832	Ca	Ag	4.931777	4.017911	False	False	False	False
521	CaAgO3	351402	Ag	Ca	4.931777	4.294855	False	False	False	False
522	CaAlO3	353261	Al	Ca	4.92559	4.086371	False	False	False	False
523	CaAlO3	354654	Ca	Al	4.92559	3.71474	False	False	False	False
524	CaAsO3	353029	Ca	As	4.99243	3.879447	False	False	False	False
525	CaAsO3	354328	As	Ca	4.99243	4.15865	False	False	False	False
526	CaAuO3	351252	Ca	Au	4.930478	4.045594	False	False	False	False
527	CaAuO3	353014	Au	Ca	4.930478	4.272115	False	False	False	False
528	CaBeO3	350609	Be	Ca	4.805716	4.110642	False	False	False	False
529	CaBeO3	350831	Ca	Be	4.805716	3.554853	False	False	False	False
530	CaBiO3	351727	Bi	Ca	5.171071	4.310565	False	False	False	False
531	CaBiO3	353977	Ca	Bi	5.171071	4.294259	False	False	False	False
532	CaBO3	350673	B	Ca	4.799686	4.28347	False	False	False	False
533	CaBO3	351801	Ca	B	4.799686	3.442185	False	False	False	False
534	CaCdO3	350576	Ca	Cd	4.991642	4.097426	False	False	False	False
535	CaCdO3	352482	Cd	Ca	4.991642	4.20747	False	False	False	False
536	CaCeO3	354840	Ca	Ce	5.158362	4.504892	False	False	False	False
537	CaCeO3	355052	Ce	Ca	5.158362	4.173241	False	False	False	False
538	CaCoO3	353094	Co	Ca	4.847994	4.207465	False	False	False	False
539	CaCoO3	353287	Ca	Co	4.847994	3.734448	False	False	False	False
540	CaCrO3	350079	Ca	Cr	4.86256	3.779947	False	False	False	False
541	CaCrO3	350586	Cr	Ca	4.86256	4.262917	False	False	False	False
542	CaCuO3	351709	Ca	Cu	4.858345	3.747788	False	False	False	False
543	CaCuO3	353009	Cu	Ca	4.858345	4.258773	False	False	False	False
544	CaDyO3	350850	Dy	Ca	5.12296	4.082123	False	False	False	False
545	CaDyO3	351197	Ca	Dy	5.12296	4.281592	False	False	False	False
546	CaErO3	351133	Ca	Er	5.111194	4.246122	False	False	False	False
547	CaErO3	353473	Er	Ca	5.111194	4.118189	False	False	False	False
548	CaEuO3	350159	Eu	Ca	5.325247	4.231649	False	False	False	False
549	CaEuO3	352856	Ca	Eu	5.325247	4.214865	False	False	False	False
550	CaFeO3	353602	Fe	Ca	4.858348	4.892101	False	False	False	True
551	CaFeO3	353644	Ca	Fe	4.858348	3.776514	False	False	False	False
552	CaGaO3	351102	Ga	Ca	4.96637	4.243996	False	False	False	False
553	CaGaO3	352774	Ca	Ga	4.96637	3.848583	False	False	False	False
554	CaGdO3	351335	Gd	Ca	5.142113	4.117405	False	False	False	False
555	CaGdO3	352987	Ca	Gd	5.142113	4.333539	False	False	False	False
556	CaGeO3	351534	Ge	Ca	5.007376	4.210502	False	False	False	False
557	CaGeO3	353585	Ca	Ge	5.007376	3.743519	False	False	False	False
558	CaHfO3	351137	Ca	Hf	5.002158	4.073531	False	False	False	False
559	CaHfO3	355131	Hf	Ca	5.002158	3.95156	False	False	False	True
560	CaHgO3	351632	Ca	Hg	5.033178	4.143901	False	False	False	False
561	CaHgO3	354391	Hg	Ca	5.033178	4.287112	False	False	False	False
562	CaHoO3	351576	Ho	Ca	5.117617	4.114977	False	False	False	False
563	CaHoO3	353849	Ca	Ho	5.117617	4.260431	False	False	False	False
564	CaInO3	352899	Ca	In	5.052442	4.110003	False	False	False	False
565	CaInO3	353497	In	Ca	5.052442	4.251484	False	False	False	False
566	CaIrO3	353756	Ca	Ir	4.891594	3.930339	False	False	False	False
567	CaIrO3	354476	Ir	Ca	4.891594	4.268578	False	False	False	False
568	CaLaO3	351638	La	Ca	5.197737	4.187036	False	False	False	False
569	CaLaO3	351816	Ca	La	5.197737	4.44606	False	False	False	False
570	CaLuO3	350794	Lu	Ca	5.097009	4.100418	False	False	False	False
571	CaLuO3	353117	Ca	Lu	5.097009	4.192856	False	False	False	False
572	CaMgO3	354087	Ca	Mg	5.014825	3.876828	False	False	False	False
573	CaMgO3	354522	Mg	Ca	5.014825	4.1882	False	False	False	False
574	CaMnO3	353155	Ca	Mn	4.865179	3.76295	False	False	False	False
575	CaMnO3	354167	Mn	Ca	4.865179	4.217724	False	False	False	False
576	CaMoO3	351826	Ca	Mo	4.911612	3.943938	False	False	False	False
577	CaMoO3	353217	Mo	Ca	4.911612	4.176404	False	False	False	False
578	CaNbO3	352480	Ca	Nb	4.944681	4.016187	False	False	False	False
579	CaNbO3	354934	Nb	Ca	4.944681	4.131561	False	False	False	False
580	CaNdO3	352915	Nd	Ca	5.156049	4.143836	False	False	False	False
581	CaNdO3	354124	Ca	Nd	5.156049	4.426412	False	False	False	False
582	CaNiO3	350577	Ca	Ni	4.846446	3.743973	False	False	False	False
583	CaNiO3	352490	Ni	Ca	4.846446	5.19695	False	True	True	True
584	CaNpO3	350860	Np	Ca	4.96156	4.96156	True	False	True	True
585	CaNpO3	354944	Ca	Np	4.96156	4.383389	False	False	False	False
586	CaOsO3	352159	Ca	Os	4.889125	3.921258	False	False	False	False
587	CaOsO3	354966	Os	Ca	4.889125	4.218537	False	False	False	True
588	CaPaO3	350021	Pa	Ca	5.03776	4.158104	False	False	False	False
589	CaPaO3	352963	Ca	Pa	5.03776	4.466256	False	False	False	False
590	CaPbO3	354482	Pb	Ca	5.107364	4.310147	False	False	False	False
591	CaPbO3	354549	Ca	Pb	5.107364	4.20415	False	False	False	False
592	CaPdO3	351028	Pd	Ca	4.89929	4.229008	False	False	False	False
593	CaPdO3	352083	Ca	Pd	4.89929	3.943639	False	False	False	False
594	CaPmO3	351996	Pm	Ca	5.143259	4.145883	False	False	False	False
595	CaPmO3	353034	Ca	Pm	5.143259	4.398777	False	False	False	False
596	CaPrO3	350699	Pr	Ca	5.160602	4.163254	False	False	False	False
597	CaPrO3	352511	Ca	Pr	5.160602	4.460406	False	False	False	False
598	CaPtO3	350300	Ca	Pt	4.904748	3.972552	False	False	False	False
599	CaPtO3	354130	Pt	Ca	4.904748	4.165178	False	False	False	False
600	CaPuO3	350000	Ca	Pu	4.977449	4.355876	False	False	False	False
601	CaPuO3	352855	Pu	Ca	4.977449	6.306593	False	True	True	True
602	CaReO3	351127	Re	Ca	4.899405	4.164343	False	False	False	False
603	CaReO3	354795	Ca	Re	4.899405	3.929016	False	False	False	False
604	CaRhO3	353329	Rh	Ca	4.886315	4.253021	False	False	False	False
605	CaRhO3	353351	Ca	Rh	4.886315	3.918043	False	False	False	False
606	CaRuO3	351748	Ca	Ru	4.883495	3.909244	False	False	False	False
607	CaRuO3	353575	Ru	Ca	4.883495	4.203947	False	False	False	True
608	CaSbO3	350388	Ca	Sb	5.106209	4.139706	False	False	False	False
609	CaSbO3	353263	Sb	Ca	5.106209	4.14462	False	False	False	False
610	CaScO3	350408	Ca	Sc	5.037953	4.041511	False	False	False	False
611	CaScO3	351578	Sc	Ca	5.037953	5.181431	False	True	True	True
612	CaSiO3	352627	Si	Ca	4.972028	4.189994	False	False	False	False
613	CaSiO3	353323	Ca	Si	4.972028	3.576134	False	False	False	False
614	CaSmO3	351013	Ca	Sm	5.143724	4.384311	False	False	False	False
615	CaSmO3	352295	Sm	Ca	5.143724	4.14374	False	False	False	False
616	CaSnO3	352288	Sn	Ca	5.065062	4.268087	False	False	False	False
617	CaSnO3	354596	Ca	Sn	5.065062	4.032859	False	False	False	False
618	CaTaO3	352831	Ta	Ca	4.94523	4.076733	False	False	False	False
619	CaTaO3	353811	Ca	Ta	4.94523	3.99954	False	False	False	False
620	CaTbO3	350601	Ca	Tb	5.129424	4.306829	False	False	False	False
621	CaTbO3	355018	Tb	Ca	5.129424	4.100699	False	False	False	False
622	CaTcO3	351542	Tc	Ca	4.891629	4.488551	False	False	False	False
623	CaTcO3	351893	Ca	Tc	4.891629	3.908547	False	False	False	False
624	CaTeO3	351008	Ca	Te	5.153749	4.212214	False	False	False	False
625	CaTeO3	355183	Te	Ca	5.153749	4.186609	False	False	False	False
626	CaThO3	351135	Ca	Th	5.139617	4.557676	False	False	False	False
627	CaThO3	354601	Th	Ca	5.139617	4.150921	False	False	False	False
628	CaTiO3	350344	Ca	Ti	4.937939	3.86681	False	False	False	False
629	CaTiO3	352602	Ti	Ca	4.937939	4.106667	False	False	False	False
630	CaTlO3	351292	Ca	Tl	5.085617	4.189462	False	False	False	False
631	CaTlO3	354415	Tl	Ca	5.085617	4.311468	False	False	False	False
632	CaTmO3	350024	Tm	Ca	5.1043	4.110673	False	False	False	False
633	CaTmO3	352035	Ca	Tm	5.1043	4.224508	False	False	False	False
634	CaUO3	352307	U	Ca	4.983305	4.196412	False	False	False	False
635	CaUO3	353080	Ca	U	4.983305	4.401169	False	False	False	False
636	CaVO3	350133	V	Ca	4.887362	4.132369	False	False	False	False
637	CaVO3	352186	Ca	V	4.887362	3.803227	False	False	False	False
638	CaWO3	353840	W	Ca	4.915295	4.13541	False	False	False	False
639	CaWO3	354318	Ca	W	4.915295	3.952158	False	False	False	False
640	CaYbO3	350968	Ca	Yb	5.24325	4.13387	False	False	False	False
641	CaYbO3	354754	Yb	Ca	5.24325	4.184402	False	False	False	False
642	CaYO3	350218	Y	Ca	5.141616	4.093497	False	False	False	False
643	CaYO3	352538	Ca	Y	5.141616	4.294781	False	False	False	False
644	CaZnO3	352693	Zn	Ca	4.906449	4.206271	False	False	False	False
645	CaZnO3	355195	Ca	Zn	4.906449	3.840119	False	False	False	False
646	CaZrO3	351598	Ca	Zr	5.01564	4.130233	False	False	False	False
647	CaZrO3	352397	Zr	Ca	5.01564	4.067437	False	False	False	True
648	Cd2O3	350802	Cd	Cd	4.682178	4.090218	False	False	False	False
649	CdAgO3	353053	Cd	Ag	4.613962	4.006754	False	False	False	False
650	CdAgO3	355015	Ag	Cd	4.613962	4.126235	False	False	False	False
651	CdAsO3	351825	Cd	As	4.683075	3.851073	False	False	False	False
652	CdAsO3	353225	As	Cd	4.683075	4.080507	False	False	False	False
653	CdAuO3	354706	Cd	Au	4.612478	4.037837	False	False	False	False
654	CdAuO3	354755	Au	Cd	4.612478	4.115084	False	False	False	False
655	CdBiO3	351077	Cd	Bi	4.884647	4.239137	False	False	False	False
656	CdBiO3	353245	Bi	Cd	4.884647	4.140719	False	False	False	False
657	CdBO3	352650	Cd	B	4.462111	3.464429	False	False	False	False
658	CdBO3	354420	B	Cd	4.462111	4.09598	False	False	False	False
659	CdCoO3	350840	Cd	Co	4.517869	3.739106	False	False	False	False
660	CdCoO3	353660	Co	Cd	4.517869	4.051037	False	False	False	False
661	CdCuO3	354026	Cd	Cu	4.529782	3.75159	False	False	False	False
662	CdCuO3	355161	Cu	Cd	4.529782	4.083593	False	False	False	False
663	CdFeO3	350140	Fe	Cd	4.529786	4.055106	False	False	False	False
664	CdFeO3	351203	Cd	Fe	4.529786	3.782162	False	False	False	False
665	CdGaO3	350022	Ga	Cd	4.653425	4.082796	False	False	False	False
666	CdGaO3	351022	Cd	Ga	4.653425	3.841042	False	False	False	False
667	CdGeO3	350472	Ge	Cd	4.70005	4.089141	False	False	False	False
668	CdGeO3	353001	Cd	Ge	4.70005	3.751792	False	False	False	False
669	CdHgO3	350243	Hg	Cd	4.729304	4.122164	False	False	False	False
670	CdHgO3	354271	Cd	Hg	4.729304	4.132666	False	False	False	False
671	CdInO3	350345	In	Cd	4.751107	4.106261	False	False	False	False
672	CdInO3	351266	Cd	In	4.751107	4.106565	False	False	False	False
673	CdIrO3	351934	Cd	Ir	4.56797	3.929182	False	False	False	False
674	CdIrO3	355272	Ir	Cd	4.56797	4.084933	False	False	False	False
675	CdMoO3	352770	Cd	Mo	4.590903	3.943017	False	False	False	False
676	CdMoO3	355154	Mo	Cd	4.590903	4.075583	False	False	False	False
677	CdNiO3	353297	Ni	Cd	4.516087	4.043064	False	False	False	False
678	CdNiO3	354107	Cd	Ni	4.516087	3.750486	False	False	False	False
679	CdOsO3	353530	Cd	Os	4.565138	3.913619	False	False	False	False
680	CdOsO3	355255	Os	Cd	4.565138	4.086988	False	False	False	False
681	CdPbO3	352694	Cd	Pb	4.813083	4.194681	False	False	False	False
682	CdPbO3	353451	Pb	Cd	4.813083	4.170951	False	False	False	False
683	CdPdO3	351734	Cd	Pd	4.576792	3.93761	False	False	False	False
684	CdPdO3	352077	Pd	Cd	4.576792	4.090314	False	False	False	False
685	CdPtO3	350639	Pt	Cd	4.583044	4.102948	False	False	False	False
686	CdPtO3	350887	Cd	Pt	4.583044	3.967704	False	False	False	False
687	CdReO3	352177	Cd	Re	4.576923	3.923818	False	False	False	False
688	CdReO3	353204	Re	Cd	4.576923	4.08	False	False	False	False
689	CdRhO3	354963	Cd	Rh	4.561914	3.914264	False	False	False	False
690	CdRhO3	355106	Rh	Cd	4.561914	4.091719	False	False	False	False
691	CdRuO3	351465	Ru	Cd	4.558678	4.082887	False	False	False	False
692	CdRuO3	352128	Cd	Ru	4.558678	3.907651	False	False	False	False
693	CdSbO3	353664	Cd	Sb	4.811781	4.052056	False	False	False	False
694	CdSbO3	354084	Sb	Cd	4.811781	4.120228	False	False	False	False
695	CdSiO3	351731	Cd	Si	4.659868	3.59274	False	False	False	False
696	CdSiO3	353184	Si	Cd	4.659868	4.070075	False	False	False	False
697	CdSnO3	353663	Sn	Cd	4.765372	4.126374	False	False	False	False
698	CdSnO3	353927	Cd	Sn	4.765372	4.02626	False	False	False	False
699	CdTcO3	352006	Tc	Cd	4.568009	4.082506	False	False	False	False
700	CdTcO3	352116	Cd	Tc	4.568009	3.907234	False	False	False	False
701	CdTeO3	352862	Te	Cd	4.865222	4.138491	False	False	False	False
702	CdTeO3	354268	Cd	Te	4.865222	4.141689	False	False	False	False
703	CdWO3	353015	Cd	W	4.595118	3.949935	False	False	False	False
704	CdWO3	353042	W	Cd	4.595118	4.070921	False	False	False	False
705	Ce2O3	354237	Ce	Ce	5.045095	4.559614	False	False	False	False
706	CeAgO3	350526	Ce	Ag	4.807456	4.073602	False	False	False	False
707	CeAgO3	354827	Ag	Ce	4.807456	4.487791	False	False	False	False
708	CeAlO3	352815	Ce	Al	4.800944	3.783405	False	False	False	False
709	CeAlO3	354802	Al	Ce	4.800944	4.501015	False	False	False	False
710	CeAsO3	352185	Ce	As	4.871226	4.061287	False	False	False	False
711	CeAsO3	352585	As	Ce	4.871226	4.504761	False	False	False	False
712	CeAuO3	353670	Au	Ce	4.806089	4.47878	False	False	False	False
713	CeAuO3	355289	Ce	Au	4.806089	4.14049	False	False	False	False
714	CeBeO3	350341	Be	Ce	4.674511	4.463362	False	False	False	False
715	CeBeO3	351688	Ce	Be	4.674511	3.674073	False	False	False	False
716	CeBiO3	354320	Ce	Bi	5.058379	4.408051	False	False	False	False
717	CeBiO3	354489	Bi	Ce	5.058379	4.561887	False	False	False	False
718	CeBO3	351970	B	Ce	4.668137	4.537265	False	False	False	False
719	CeBO3	352445	Ce	B	4.668137	3.593758	False	False	False	False
720	CeCdO3	353904	Cd	Ce	4.870397	4.509797	False	False	False	False
721	CeCdO3	354119	Ce	Cd	4.870397	4.141367	False	False	False	False
722	CeCoO3	351470	Ce	Co	4.719162	3.760096	False	False	False	False
723	CeCoO3	352292	Co	Ce	4.719162	4.490985	False	False	False	False
724	CeCrO3	352925	Cr	Ce	4.73453	4.52989	False	False	False	False
725	CeCrO3	354089	Ce	Cr	4.73453	3.897177	False	False	False	False
726	CeCuO3	353852	Cu	Ce	4.730083	4.462873	False	False	False	False
727	CeCuO3	355275	Ce	Cu	4.730083	3.829366	False	False	False	False
728	CeDyO3	352909	Dy	Ce	5.008068	4.532062	False	False	False	False
729	CeDyO3	353079	Ce	Dy	5.008068	4.299826	False	False	False	False
730	CeErO3	350005	Ce	Er	4.995753	4.256893	False	False	False	False
731	CeErO3	352485	Er	Ce	4.995753	4.529362	False	False	False	False
732	CeEuO3	351593	Eu	Ce	5.219186	4.493828	False	False	False	False
733	CeEuO3	354929	Ce	Eu	5.219186	4.295544	False	False	False	False
734	CeFeO3	354336	Fe	Ce	4.730087	4.498645	False	False	False	True
735	CeFeO3	355216	Ce	Fe	4.730087	3.91746	False	False	False	False
736	CeGaO3	351301	Ga	Ce	4.843842	4.507854	False	False	False	False
737	CeGaO3	353649	Ce	Ga	4.843842	3.885578	False	False	False	False
738	CeGdO3	351866	Gd	Ce	5.028104	4.537178	False	False	False	False
739	CeGdO3	352505	Ce	Gd	5.028104	4.349563	False	False	False	False
740	CeGeO3	351947	Ge	Ce	4.886921	4.5029	False	False	False	False
741	CeGeO3	353859	Ce	Ge	4.886921	3.961306	False	False	False	False
742	CeHfO3	352910	Hf	Ce	4.881442	4.512984	False	False	False	False
743	CeHfO3	355282	Ce	Hf	4.881442	4.110025	False	False	False	False
744	CeHgO3	354374	Hg	Ce	4.913999	4.499867	False	False	False	False
745	CeHgO3	354835	Ce	Hg	4.913999	4.229219	False	False	False	False
746	CeHoO3	350060	Ho	Ce	5.002477	4.531784	False	False	False	False
747	CeHoO3	354277	Ce	Ho	5.002477	4.276991	False	False	False	False
748	CeInO3	353745	In	Ce	4.934204	4.527957	False	False	False	False
749	CeInO3	355063	Ce	In	4.934204	4.116379	False	False	False	False
750	CeIrO3	351034	Ce	Ir	4.765141	4.006002	False	False	False	False
751	CeIrO3	354880	Ir	Ce	4.765141	4.510502	False	False	False	False
752	CeLuO3	350876	Lu	Ce	4.980902	4.525603	False	False	False	False
753	CeLuO3	352210	Ce	Lu	4.980902	4.194956	False	False	False	False
754	CeMgO3	351054	Mg	Ce	4.894741	4.488216	False	False	False	False
755	CeMgO3	353713	Ce	Mg	4.894741	3.900869	False	False	False	False
756	CeMnO3	350496	Mn	Ce	4.737292	4.482855	False	False	False	False
757	CeMnO3	353812	Ce	Mn	4.737292	3.909954	False	False	False	False
758	CeMoO3	351250	Mo	Ce	4.786228	4.512055	False	False	False	False
759	CeMoO3	354924	Ce	Mo	4.786228	4.00524	False	False	False	False
760	CeNbO3	351999	Ce	Nb	4.821034	4.069843	False	False	False	False
761	CeNbO3	355099	Nb	Ce	4.821034	4.509081	False	False	False	False
762	CeNdO3	350752	Nd	Ce	5.042677	4.549116	False	False	False	False
763	CeNdO3	355284	Ce	Nd	5.042677	4.478984	False	False	False	False
764	CeNiO3	350419	Ce	Ni	4.717528	3.814913	False	False	False	False
765	CeNiO3	351359	Ni	Ce	4.717528	4.43326	False	False	False	True
766	CeNpO3	350101	Np	Ce	4.838784	4.549663	False	False	False	False
767	CeNpO3	355032	Ce	Np	4.838784	4.443414	False	False	False	False
768	CeOsO3	350023	Os	Ce	4.762539	4.513335	False	False	False	False
769	CeOsO3	354809	Ce	Os	4.762539	3.987822	False	False	False	False
770	CePaO3	351637	Pa	Ce	4.918807	4.541657	False	False	False	False
771	CePaO3	353484	Ce	Pa	4.918807	4.484612	False	False	False	False
772	CePbO3	350503	Ce	Pb	4.991745	4.178573	False	False	False	False
773	CePbO3	353422	Pb	Ce	4.991745	4.509024	False	False	False	False
774	CePdO3	350935	Ce	Pd	4.77325	4.010546	False	False	False	False
775	CePdO3	351228	Pd	Ce	4.77325	4.527225	False	False	False	False
776	CePmO3	352235	Ce	Pm	5.029303	4.440048	False	False	False	False
777	CePmO3	352517	Pm	Ce	5.029303	4.545123	False	False	False	False
778	CePrO3	351090	Ce	Pr	5.047437	4.517101	False	False	False	False
779	CePrO3	355250	Pr	Ce	5.047437	4.553591	False	False	False	False
780	CePtO3	350657	Ce	Pt	4.778999	4.061643	False	False	False	False
781	CePtO3	354381	Pt	Ce	4.778999	4.530367	False	False	False	False
782	CePuO3	350100	Ce	Pu	4.855486	4.382205	False	False	False	False
783	CePuO3	354418	Pu	Ce	4.855486	4.636328	False	False	False	False
784	CeReO3	350993	Ce	Re	4.773371	3.995726	False	False	False	False
785	CeReO3	351072	Re	Ce	4.773371	4.493548	False	False	False	False
786	CeRhO3	350145	Ce	Rh	4.759576	3.9748	False	False	False	False
787	CeRhO3	353173	Rh	Ce	4.759576	4.526008	False	False	False	False
788	CeRuO3	354519	Ru	Ce	4.756604	4.513585	False	False	False	False
789	CeRuO3	354694	Ce	Ru	4.756604	3.969323	False	False	False	False
790	CeSbO3	350115	Ce	Sb	4.990535	4.260792	False	False	False	False
791	CeSbO3	354650	Sb	Ce	4.990535	4.552252	False	False	False	False
792	CeScO3	351710	Sc	Ce	4.919009	4.517041	False	False	False	False
793	CeScO3	353221	Ce	Sc	4.919009	4.045293	False	False	False	False
794	CeSiO3	350461	Si	Ce	4.849789	4.491777	False	False	False	False
795	CeSiO3	352471	Ce	Si	4.849789	3.811866	False	False	False	False
796	CeSmO3	351134	Sm	Ce	5.029789	4.542565	False	False	False	False
797	CeSmO3	355171	Ce	Sm	5.029789	4.414858	False	False	False	False
798	CeSnO3	353580	Sn	Ce	4.947434	4.522425	False	False	False	False
799	CeSnO3	354390	Ce	Sn	4.947434	4.166269	False	False	False	False
800	CeTaO3	352257	Ta	Ce	4.821611	4.506831	False	False	False	False
801	CeTaO3	352734	Ce	Ta	4.821611	4.045967	False	False	False	False
802	CeTbO3	353501	Tb	Ce	5.014831	4.536067	False	False	False	False
803	CeTbO3	354029	Ce	Tb	5.014831	4.323791	False	False	False	False
804	CeTcO3	352109	Ce	Tc	4.765177	3.987752	False	False	False	False
805	CeTcO3	352520	Tc	Ce	4.765177	4.498985	False	False	False	False
806	CeTeO3	350698	Ce	Te	5.040272	4.277805	False	False	False	False
807	CeTeO3	351708	Te	Ce	5.040272	4.567397	False	False	False	False
808	CeThO3	352678	Th	Ce	5.025494	4.540143	False	False	False	False
809	CeThO3	355062	Ce	Th	5.025494	4.566083	False	False	False	False
810	CeTiO3	350028	Ce	Ti	4.813941	3.937627	False	False	False	False
811	CeTiO3	353972	Ti	Ce	4.813941	4.499488	False	False	False	False
812	CeTlO3	350375	Ce	Tl	4.968971	4.273398	False	False	False	False
813	CeTlO3	353589	Tl	Ce	4.968971	4.632711	False	False	False	False
814	CeTmO3	350213	Ce	Tm	4.988537	4.232279	False	False	False	False
815	CeTmO3	354903	Tm	Ce	4.988537	4.528743	False	False	False	False
816	CeUO3	350681	U	Ce	4.861639	4.546712	False	False	False	False
817	CeUO3	353444	Ce	U	4.861639	4.412664	False	False	False	False
818	CeVO3	351749	V	Ce	4.760681	4.501725	False	False	False	False
819	CeVO3	353919	Ce	V	4.760681	3.92393	False	False	False	False
820	CeWO3	352572	Ce	W	4.790107	4.007807	False	False	False	False
821	CeWO3	355215	W	Ce	4.790107	4.507929	False	False	False	False
822	CeYO3	352448	Y	Ce	5.027584	4.535696	False	False	False	False
823	CeYO3	353735	Ce	Y	5.027584	4.300325	False	False	False	False
824	CeZnO3	352784	Ce	Zn	4.78079	3.897278	False	False	False	False
825	CeZnO3	354973	Zn	Ce	4.78079	4.477737	False	False	False	False
826	CeZrO3	352203	Zr	Ce	4.895596	4.519835	False	False	False	False
827	CeZrO3	353273	Ce	Zr	4.895596	4.161478	False	False	False	False
828	Co2O3	354095	Co	Co	4.340651	3.650747	False	False	False	False
829	CoAgO3	350753	Ag	Co	4.444477	3.744855	False	False	False	False
830	CoAgO3	353358	Co	Ag	4.444477	3.972793	False	False	False	False
831	CoAsO3	352894	As	Co	4.518832	3.659228	False	False	False	False
832	CoAsO3	352940	Co	As	4.518832	3.768767	False	False	False	False
833	CoAuO3	350016	Co	Au	4.442878	3.995967	False	False	False	False
834	CoAuO3	354051	Au	Co	4.442878	3.756331	False	False	False	False
835	CoBiO3	351281	Bi	Co	4.734335	3.771092	False	False	False	False
836	CoBiO3	353645	Co	Bi	4.734335	4.201492	False	False	False	False
837	CoBO3	350161	B	Co	4.28015	3.616926	False	False	False	False
838	CoBO3	350359	Co	B	4.28015	3.323715	False	False	False	False
839	CoCuO3	352454	Co	Cu	4.353552	3.671383	False	False	False	False
840	CoCuO3	353159	Cu	Co	4.353552	3.664858	False	False	False	False
841	CoGeO3	353023	Ge	Co	4.537056	3.713209	False	False	False	False
842	CoGeO3	353708	Co	Ge	4.537056	3.689272	False	False	False	False
843	CoHgO3	353179	Hg	Co	4.568429	3.779847	False	False	False	False
844	CoHgO3	353447	Co	Hg	4.568429	4.110093	False	False	False	False
845	CoIrO3	353419	Ir	Co	4.394851	3.658078	False	False	False	False
846	CoIrO3	353622	Co	Ir	4.394851	3.880493	False	False	False	False
847	CoMoO3	353415	Mo	Co	4.419611	3.658242	False	False	False	False
848	CoMoO3	354992	Co	Mo	4.419611	3.878688	False	False	False	False
849	CoNiO3	350245	Co	Ni	4.338721	3.643928	False	False	False	False
850	CoNiO3	351403	Ni	Co	4.338721	6.131565	False	True	True	True
851	CoOsO3	352117	Co	Os	4.391791	3.900318	False	False	False	False
852	CoOsO3	353038	Os	Co	4.391791	3.634281	False	False	False	False
853	CoPbO3	350136	Pb	Co	4.658042	3.824519	False	False	False	False
854	CoPbO3	354203	Co	Pb	4.658042	4.173996	False	False	False	False
855	CoPdO3	350799	Co	Pd	4.404379	3.944599	False	False	False	False
856	CoPdO3	352479	Pd	Co	4.404379	3.695314	False	False	False	False
857	CoPtO3	352626	Pt	Co	4.411129	3.693507	False	False	False	False
858	CoPtO3	355068	Co	Pt	4.411129	3.924989	False	False	False	False
859	CoReO3	350834	Co	Re	4.404521	3.874569	False	False	False	False
860	CoReO3	352088	Re	Co	4.404521	3.66345	False	False	False	False
861	CoRhO3	350086	Co	Rh	4.388307	3.863198	False	False	False	False
862	CoRhO3	352612	Rh	Co	4.388307	3.6817	False	False	False	False
863	CoRuO3	351238	Ru	Co	4.38481	3.659732	False	False	False	False
864	CoRuO3	354717	Co	Ru	4.38481	3.847051	False	False	False	False
865	CoSbO3	351962	Sb	Co	4.656652	3.733505	False	False	False	False
866	CoSbO3	354961	Co	Sb	4.656652	3.985672	False	False	False	False
867	CoSiO3	352553	Si	Co	4.493893	3.665053	False	False	False	False
868	CoSiO3	353782	Co	Si	4.493893	3.509639	False	False	False	False
869	CoSnO3	350515	Sn	Co	4.607049	3.727807	False	False	False	False
870	CoSnO3	352385	Co	Sn	4.607049	4.001248	False	False	False	False
871	CoTcO3	353868	Co	Tc	4.394893	3.872197	False	False	False	False
872	CoTcO3	354830	Tc	Co	4.394893	3.666673	False	False	False	False
873	CoTeO3	350019	Co	Te	4.713648	4.100485	False	False	False	False
874	CoTeO3	352269	Te	Co	4.713648	3.74604	False	False	False	False
875	CoWO3	352237	W	Co	4.424159	3.647708	False	False	False	False
876	CoWO3	354481	Co	W	4.424159	3.896297	False	False	False	False
877	Cr2O3	353850	Cr	Cr	4.3768	3.745936	False	False	False	False
878	CrAgO3	351755	Ag	Cr	4.461794	3.778709	False	False	False	False
879	CrAgO3	353697	Cr	Ag	4.461794	3.985374	False	False	False	False
880	CrAsO3	351079	Cr	As	4.535586	3.774037	False	False	False	False
881	CrAsO3	354219	As	Cr	4.535586	3.79217	False	False	False	False
882	CrAuO3	350464	Cr	Au	4.460206	4.031197	False	False	False	False
883	CrAuO3	351608	Au	Cr	4.460206	3.810638	False	False	False	False
884	CrBiO3	351476	Cr	Bi	4.749606	4.197214	False	False	False	False
885	CrBiO3	354527	Bi	Cr	4.749606	3.888379	False	False	False	False
886	CrBO3	354526	B	Cr	4.298813	3.69852	False	False	False	False
887	CrBO3	355005	Cr	B	4.298813	3.334896	False	False	False	False
888	CrCdO3	353357	Cr	Cd	4.534631	4.088224	False	False	False	False
889	CrCdO3	355246	Cd	Cr	4.534631	3.793947	False	False	False	False
890	CrCoO3	350448	Co	Cr	4.358801	3.730523	False	False	False	False
891	CrCoO3	354005	Cr	Co	4.358801	3.586064	False	False	False	False
892	CrCuO3	350045	Cr	Cu	4.371595	3.683969	False	False	False	False
893	CrCuO3	354615	Cu	Cr	4.371595	3.705281	False	False	False	False
894	CrFeO3	350199	Fe	Cr	4.371599	3.942212	False	False	False	False
895	CrFeO3	352301	Cr	Fe	4.371599	3.744463	False	False	False	False
896	CrGaO3	351524	Cr	Ga	4.503956	3.787827	False	False	False	False
897	CrGaO3	352231	Ga	Cr	4.503956	3.763344	False	False	False	False
898	CrGeO3	354504	Cr	Ge	4.553677	3.707163	False	False	False	False
899	CrGeO3	354603	Ge	Cr	4.553677	3.782349	False	False	False	False
900	CrHgO3	354568	Hg	Cr	4.584823	3.829821	False	False	False	False
901	CrHgO3	354971	Cr	Hg	4.584823	4.129152	False	False	False	False
902	CrInO3	351664	Cr	In	4.608011	4.163425	False	False	False	False
903	CrInO3	352057	In	Cr	4.608011	3.821285	False	False	False	False
904	CrIrO3	352284	Ir	Cr	4.412558	3.790235	False	False	False	False
905	CrIrO3	353327	Cr	Ir	4.412558	3.890645	False	False	False	False
906	CrMoO3	354049	Cr	Mo	4.437122	3.901566	False	False	False	False
907	CrMoO3	354063	Mo	Cr	4.437122	3.792074	False	False	False	False
908	CrNiO3	351440	Ni	Cr	4.356886	3.708137	False	False	False	False
909	CrNiO3	353874	Cr	Ni	4.356886	3.67059	False	False	False	False
910	CrOsO3	353777	Cr	Os	4.409523	3.869865	False	False	False	False
911	CrOsO3	354759	Os	Cr	4.409523	3.808593	False	False	False	False
912	CrPbO3	350467	Cr	Pb	4.673815	4.206276	False	False	False	False
913	CrPbO3	353128	Pb	Cr	4.673815	3.88495	False	False	False	False
914	CrPdO3	353551	Pd	Cr	4.42201	3.772104	False	False	False	False
915	CrPdO3	353892	Cr	Pd	4.42201	3.925739	False	False	False	False
916	CrPtO3	351478	Pt	Cr	4.428707	3.780591	False	False	False	False
917	CrPtO3	352536	Cr	Pt	4.428707	3.939615	False	False	False	False
918	CrReO3	350862	Cr	Re	4.422151	3.881484	False	False	False	False
919	CrReO3	353319	Re	Cr	4.422151	3.807038	False	False	False	False
920	CrRhO3	350481	Cr	Rh	4.406067	3.879254	False	False	False	False
921	CrRhO3	352996	Rh	Cr	4.406067	3.754397	False	False	False	False
922	CrRuO3	350543	Ru	Cr	4.402598	3.790023	False	False	False	False
923	CrRuO3	351493	Cr	Ru	4.402598	3.856252	False	False	False	False
924	CrSbO3	351674	Sb	Cr	4.672434	3.856427	False	False	False	False
925	CrSbO3	351732	Cr	Sb	4.672434	3.986492	False	False	False	False
926	CrSiO3	352473	Cr	Si	4.510833	3.531458	False	False	False	False
927	CrSiO3	352523	Si	Cr	4.510833	3.758947	False	False	False	False
928	CrSnO3	350373	Cr	Sn	4.623171	4.010269	False	False	False	False
929	CrSnO3	353674	Sn	Cr	4.623171	3.848612	False	False	False	False
930	CrTcO3	352442	Tc	Cr	4.4126	3.804047	False	False	False	False
931	CrTcO3	353481	Cr	Tc	4.4126	3.865253	False	False	False	False
932	CrTeO3	351105	Te	Cr	4.729053	3.872	False	False	False	False
933	CrTeO3	353613	Cr	Te	4.729053	4.078072	False	False	False	False
934	CrWO3	350340	W	Cr	4.441634	3.798917	False	False	False	False
935	CrWO3	351188	Cr	W	4.441634	3.907887	False	False	False	False
936	Cs2O3	351053	Cs	Cs	6.565569	4.53784	False	False	False	False
937	CsAcO3	353776	Ac	Cs	5.93239	4.618671	False	False	False	False
938	CsAcO3	354653	Cs	Ac	5.93239	4.634332	False	False	False	False
939	CsAgO3	352216	Cs	Ag	5.732834	4.217344	False	False	False	False
940	CsAgO3	354070	Ag	Cs	5.732834	4.361973	False	False	False	False
941	CsAlO3	352733	Al	Cs	5.728257	4.425951	False	False	False	False
942	CsAlO3	352941	Cs	Al	5.728257	3.947544	False	False	False	False
943	CsAsO3	351371	As	Cs	5.77792	4.435893	False	False	False	False
944	CsAsO3	353651	Cs	As	5.77792	4.0358	False	False	False	False
945	CsAuO3	350310	Au	Cs	5.731873	4.367209	False	False	False	False
946	CsAuO3	352403	Cs	Au	5.731873	4.211347	False	False	False	False
947	CsBaO3	352267	Cs	Ba	6.169156	4.707727	False	False	False	False
948	CsBaO3	352592	Ba	Cs	6.169156	4.570661	False	False	False	False
949	CsBeO3	353827	Be	Cs	5.640424	4.375698	False	False	False	False
950	CsBeO3	353894	Cs	Be	5.640424	3.800192	False	False	False	False
951	CsBiO3	351584	Bi	Cs	5.912941	4.530239	False	False	False	False
952	CsBiO3	355189	Cs	Bi	5.912941	4.36494	False	False	False	False
953	CsBO3	352311	Cs	B	5.636049	3.697171	False	False	False	False
954	CsBO3	354714	B	Cs	5.636049	4.3363	False	False	False	False
955	CsCaO3	351983	Cs	Ca	5.986646	4.53526	False	False	False	False
956	CsCaO3	353503	Ca	Cs	5.986646	4.483077	False	False	False	False
957	CsCdO3	350437	Cd	Cs	5.777331	4.436317	False	False	False	False
958	CsCdO3	351249	Cs	Cd	5.777331	4.360221	False	False	False	False
959	CsCeO3	350146	Ce	Cs	5.903229	5.903229	True	False	True	True
960	CsCeO3	351777	Cs	Ce	5.903229	4.715285	False	False	False	False
961	CsCoO3	351758	Co	Cs	5.671217	5.671217	True	False	True	True
962	CsCoO3	353289	Cs	Co	5.671217	8.058838	False	True	True	True
963	CsCrO3	351296	Cr	Cs	5.681873	5.681873	True	False	True	True
964	CsCrO3	351327	Cs	Cr	5.681873	4.047495	False	False	False	True
965	CsCuO3	353108	Cu	Cs	5.678787	4.322029	False	False	False	False
966	CsCuO3	354027	Cs	Cu	5.678787	3.983431	False	False	False	False
967	CsDyO3	352313	Cs	Dy	5.876259	4.523318	False	False	False	False
968	CsDyO3	355064	Dy	Cs	5.876259	5.876259	True	False	True	True
969	CsErO3	353787	Cs	Er	5.867323	4.482512	False	False	False	False
970	CsErO3	355179	Er	Cs	5.867323	5.757721	False	False	False	True
971	CsEuO3	353350	Eu	Cs	6.031993	4.469165	False	False	False	False
972	CsEuO3	353400	Cs	Eu	6.031993	4.592702	False	False	False	False
973	CsFeO3	351579	Fe	Cs	5.678789	5.678789	True	False	True	True
974	CsFeO3	352630	Cs	Fe	5.678789	6.347553	False	True	True	True
975	CsGaO3	350959	Cs	Ga	5.7585	4.064407	False	False	False	False
976	CsGaO3	353579	Ga	Cs	5.7585	4.405015	False	False	False	False
977	CsGdO3	351527	Cs	Gd	5.890834	4.562071	False	False	False	False
978	CsGdO3	353340	Gd	Cs	5.890834	5.890834	True	False	True	True
979	CsGeO3	351121	Ge	Cs	5.789091	4.46438	False	False	False	False
980	CsGeO3	352131	Cs	Ge	5.789091	4.001511	False	False	False	False
981	CsHfO3	350805	Hf	Cs	5.785188	5.785188	True	False	True	True
982	CsHfO3	354779	Cs	Hf	5.785188	4.241571	False	False	False	False
983	CsHgO3	353380	Cs	Hg	5.808429	4.354582	False	False	False	False
984	CsHgO3	354777	Hg	Cs	5.808429	4.4369	False	False	False	False
985	CsHoO3	350527	Cs	Ho	5.8722	4.498992	False	False	False	False
986	CsHoO3	352833	Ho	Cs	5.8722	5.8722	True	False	True	True
987	CsInO3	351360	In	Cs	5.822914	4.464378	False	False	False	False
988	CsInO3	351603	Cs	In	5.822914	4.332315	False	False	False	False
989	CsIrO3	350827	Ir	Cs	5.703185	5.703185	True	False	True	True
990	CsIrO3	350872	Cs	Ir	5.703185	4.060379	False	False	False	False
991	CsKO3	351065	K	Cs	6.271372	4.424661	False	False	False	False
992	CsKO3	355007	Cs	K	6.271372	4.78201	False	False	False	False
993	CsLaO3	350013	Cs	La	5.93337	4.634599	False	False	False	False
994	CsLaO3	352493	La	Cs	5.93337	5.93337	True	False	True	True
995	CsLiO3	350821	Cs	Li	5.778367	4.01816	False	False	False	False
996	CsLiO3	352570	Li	Cs	5.778367	4.351546	False	False	False	False
997	CsLuO3	353346	Cs	Lu	5.856569	4.412726	False	False	False	False
998	CsLuO3	354232	Lu	Cs	5.856569	5.856569	True	False	True	True
999	CsMgO3	352638	Cs	Mg	5.794666	4.141736	False	False	False	False
1000	CsMgO3	353472	Mg	Cs	5.794666	4.441054	False	False	False	False
1001	CsMnO3	354042	Cs	Mn	5.683792	4.500214	False	False	False	True
1002	CsMnO3	354400	Mn	Cs	5.683792	5.683792	True	False	True	True
1003	CsMoO3	352266	Mo	Cs	5.717933	5.717933	True	False	True	True
1004	CsMoO3	353694	Cs	Mo	5.717933	4.062551	False	False	False	False
1005	CsNaO3	353795	Na	Cs	5.950169	4.364864	False	False	False	False
1006	CsNaO3	354445	Cs	Na	5.950169	4.406437	False	False	False	False
1007	CsNbO3	350995	Nb	Cs	5.742393	5.742393	True	False	True	True
1008	CsNbO3	354020	Cs	Nb	5.742393	4.139673	False	False	False	False
1009	CsNdO3	350859	Cs	Nd	5.901463	4.647049	False	False	False	False
1010	CsNdO3	352434	Nd	Cs	5.901463	5.901463	True	False	True	True
1011	CsNiO3	353731	Cs	Ni	5.670086	4.484922	False	False	False	True
1012	CsNiO3	354514	Ni	Cs	5.670086	5.670086	True	False	True	True
1013	CsNpO3	350686	Cs	Np	5.754923	4.39941	False	False	False	False
1014	CsNpO3	352340	Np	Cs	5.754923	5.754923	True	False	True	True
1015	CsOsO3	350791	Os	Cs	5.701369	5.701369	True	False	True	True
1016	CsOsO3	350911	Cs	Os	5.701369	4.022113	False	False	False	False
1017	CsPaO3	350682	Cs	Pa	5.811871	4.459266	False	False	False	False
1018	CsPaO3	353354	Pa	Cs	5.811871	5.811871	True	False	True	True
1019	CsPbO3	350747	Pb	Cs	5.864418	4.566189	False	False	False	False
1020	CsPbO3	351223	Cs	Pb	5.864418	4.4162	False	False	False	False
1021	CsPdO3	353062	Pd	Cs	5.70885	4.371545	False	False	False	False
1022	CsPdO3	354085	Cs	Pd	5.70885	4.120693	False	False	False	False
1023	CsPmO3	350789	Pm	Cs	5.891708	5.891708	True	False	True	True
1024	CsPmO3	351665	Cs	Pm	5.891708	4.615681	False	False	False	False
1025	CsPrO3	350333	Pr	Cs	5.904939	5.904939	True	False	True	True
1026	CsPrO3	350643	Cs	Pr	5.904939	4.679439	False	False	False	False
1027	CsPtO3	350412	Pt	Cs	5.712871	5.712871	True	False	True	True
1028	CsPtO3	354763	Cs	Pt	5.712871	4.129922	False	False	False	False
1029	CsPuO3	350443	Pu	Cs	5.766747	5.766747	True	False	True	True
1030	CsPuO3	350745	Cs	Pu	5.766747	4.446609	False	False	False	False
1031	CsRbO3	351263	Cs	Rb	6.414815	4.686958	False	False	False	False
1032	CsRbO3	354951	Rb	Cs	6.414815	4.468787	False	False	False	False
1033	CsReO3	350590	Re	Cs	5.708935	4.448945	False	False	False	False
1034	CsReO3	351750	Cs	Re	5.708935	4.032321	False	False	False	False
1035	CsRhO3	350546	Rh	Cs	5.699303	5.699303	True	False	True	True
1036	CsRhO3	353639	Cs	Rh	5.699303	4.059162	False	False	False	False
1037	CsRuO3	350986	Ru	Cs	5.69723	5.69723	True	False	True	True
1038	CsRuO3	352888	Cs	Ru	5.69723	4.032301	False	False	False	False
1039	CsSbO3	351804	Sb	Cs	5.863541	4.501421	False	False	False	False
1040	CsSbO3	352644	Cs	Sb	5.863541	4.156965	False	False	False	False
1041	CsScO3	352384	Sc	Cs	5.812016	5.812016	True	False	True	True
1042	CsScO3	354774	Cs	Sc	5.812016	4.272087	False	False	False	False
1043	CsSiO3	350582	Si	Cs	5.76271	4.450554	False	False	False	False
1044	CsSiO3	351473	Cs	Si	5.76271	3.835313	False	False	False	False
1045	CsSmO3	350644	Cs	Sm	5.892062	4.602354	False	False	False	False
1046	CsSmO3	354803	Sm	Cs	5.892062	5.892062	True	False	True	True
1047	CsSnO3	350287	Cs	Sn	5.832423	4.231835	False	False	False	False
1048	CsSnO3	353369	Sn	Cs	5.832423	4.50563	False	False	False	False
1049	CsSrO3	350772	Sr	Cs	6.095279	4.51681	False	False	False	False
1050	CsSrO3	352541	Cs	Sr	6.095279	4.721924	False	False	False	False
1051	CsTaO3	351457	Cs	Ta	5.7428	4.115666	False	False	False	False
1052	CsTaO3	352703	Ta	Cs	5.7428	4.456766	False	False	False	False
1053	CsTbO3	353608	Cs	Tb	5.881174	4.54365	False	False	False	False
1054	CsTbO3	355076	Tb	Cs	5.881174	5.881174	True	False	True	True
1055	CsTcO3	350713	Cs	Tc	5.70321	4.032343	False	False	False	False
1056	CsTcO3	353737	Tc	Cs	5.70321	5.70321	True	False	True	True
1057	CsTeO3	351277	Cs	Te	5.899707	4.220583	False	False	False	False
1058	CsTeO3	352846	Te	Cs	5.899707	4.50618	False	False	False	False
1059	CsThO3	352576	Th	Cs	5.888933	5.888933	True	False	True	True
1060	CsThO3	352625	Cs	Th	5.888933	4.610108	False	False	False	False
1061	CsTiO3	351482	Cs	Ti	5.737397	4.068448	False	False	False	False
1062	CsTiO3	354080	Ti	Cs	5.737397	4.457572	False	False	False	False
1063	CsTlO3	352587	Tl	Cs	5.847946	4.47474	False	False	False	False
1064	CsTlO3	354567	Cs	Tl	5.847946	4.421533	False	False	False	False
1065	CsTmO3	350706	Tm	Cs	5.862094	5.862094	True	False	True	True
1066	CsTmO3	352531	Cs	Tm	5.862094	4.453502	False	False	False	False
1067	CsUO3	350773	U	Cs	5.771112	5.771112	True	False	True	True
1068	CsUO3	351846	Cs	U	5.771112	4.415419	False	False	False	False
1069	CsVO3	352016	V	Cs	5.700073	5.700073	True	False	True	True
1070	CsVO3	354692	Cs	V	5.700073	3.985834	False	False	False	False
1071	CsWO3	350565	Cs	W	5.720652	4.059402	False	False	False	False
1072	CsWO3	353059	W	Cs	5.720652	5.720652	True	False	True	True
1073	CsYbO3	350906	Yb	Cs	5.968396	4.454925	False	False	False	False
1074	CsYbO3	353171	Cs	Yb	5.968396	4.458489	False	False	False	False
1075	CsYO3	351521	Y	Cs	5.890456	4.512764	False	False	False	False
1076	CsYO3	352344	Cs	Y	5.890456	4.535027	False	False	False	False
1077	CsZnO3	354298	Zn	Cs	5.714125	4.389802	False	False	False	False
1078	CsZnO3	354370	Cs	Zn	5.714125	4.091346	False	False	False	False
1079	CsZrO3	351746	Cs	Zr	5.795277	4.298811	False	False	False	False
1080	CsZrO3	354486	Zr	Cs	5.795277	4.490747	False	False	False	False
1081	Cu2O3	353442	Cu	Cu	4.366377	3.676659	False	False	False	False
1082	CuAgO3	354270	Cu	Ag	4.456785	3.976578	False	False	False	False
1083	CuAgO3	355178	Ag	Cu	4.456785	3.754557	False	False	False	False
1084	CuAsO3	351498	As	Cu	4.530739	3.70178	False	False	False	False
1085	CuAsO3	351769	Cu	As	4.530739	3.681809	False	False	False	False
1086	CuAuO3	352779	Cu	Au	4.455194	4.003986	False	False	False	False
1087	CuAuO3	353113	Au	Cu	4.455194	3.762413	False	False	False	False
1088	CuBiO3	352869	Bi	Cu	4.745187	3.810306	False	False	False	False
1089	CuBiO3	353041	Cu	Bi	4.745187	4.126806	False	False	False	False
1090	CuBO3	352935	B	Cu	4.293417	3.637657	False	False	False	False
1091	CuBO3	353314	Cu	B	4.293417	3.319102	False	False	False	False
1092	CuGeO3	351302	Cu	Ge	4.548869	3.698048	False	False	False	False
1093	CuGeO3	354575	Ge	Cu	4.548869	3.724781	False	False	False	False
1094	CuHgO3	353931	Hg	Cu	4.58008	3.789571	False	False	False	False
1095	CuHgO3	354146	Cu	Hg	4.58008	4.129115	False	False	False	False
1096	CuIrO3	352142	Ir	Cu	4.407437	3.686336	False	False	False	False
1097	CuIrO3	353757	Cu	Ir	4.407437	3.852774	False	False	False	False
1098	CuMoO3	350656	Mo	Cu	4.432057	3.696295	False	False	False	False
1099	CuMoO3	354122	Cu	Mo	4.432057	3.870357	False	False	False	False
1100	CuNiO3	351939	Ni	Cu	4.351633	3.681284	False	False	False	False
1101	CuNiO3	354037	Cu	Ni	4.351633	3.663426	False	False	False	False
1102	CuOsO3	350171	Cu	Os	4.404395	3.834073	False	False	False	False
1103	CuOsO3	350385	Os	Cu	4.404395	3.721908	False	False	False	False
1104	CuPbO3	353211	Cu	Pb	4.669251	4.19451	False	False	False	False
1105	CuPbO3	353759	Pb	Cu	4.669251	3.82415	False	False	False	False
1106	CuPdO3	355105	Cu	Pd	4.416911	3.896586	False	False	False	False
1107	CuPdO3	355151	Pd	Cu	4.416911	3.704458	False	False	False	False
1108	CuPtO3	350630	Pt	Cu	4.423623	3.728331	False	False	False	False
1109	CuPtO3	355134	Cu	Pt	4.423623	3.914161	False	False	False	False
1110	CuReO3	351861	Re	Cu	4.417052	3.702327	False	False	False	False
1111	CuReO3	355234	Cu	Re	4.417052	3.85071	False	False	False	False
1112	CuRhO3	350291	Rh	Cu	4.400931	3.716549	False	False	False	False
1113	CuRhO3	354796	Cu	Rh	4.400931	3.851226	False	False	False	False
1114	CuRuO3	351913	Cu	Ru	4.397453	3.821744	False	False	False	False
1115	CuRuO3	353417	Ru	Cu	4.397453	3.712636	False	False	False	False
1116	CuSbO3	350824	Cu	Sb	4.667868	3.905378	False	False	False	False
1117	CuSbO3	351400	Sb	Cu	4.667868	3.772713	False	False	False	False
1118	CuSiO3	351513	Si	Cu	4.505933	3.672732	False	False	False	False
1119	CuSiO3	353835	Cu	Si	4.505933	3.500458	False	False	False	False
1120	CuSnO3	353283	Cu	Sn	4.618506	4.017968	False	False	False	False
1121	CuSnO3	353653	Sn	Cu	4.618506	3.769014	False	False	False	False
1122	CuTcO3	351293	Tc	Cu	4.407479	3.712207	False	False	False	False
1123	CuTcO3	353561	Cu	Tc	4.407479	3.831003	False	False	False	False
1124	CuTeO3	350998	Te	Cu	4.724595	3.784385	False	False	False	False
1125	CuTeO3	354288	Cu	Te	4.724595	4.00128	False	False	False	False
1126	CuWO3	351595	Cu	W	4.436579	3.878516	False	False	False	False
1127	CuWO3	352446	W	Cu	4.436579	3.686123	False	False	False	False
1128	Dy2O3	354794	Dy	Dy	4.970485	4.259922	False	False	False	False
1129	DyAgO3	351850	Dy	Ag	4.766631	4.015904	False	False	False	False
1130	DyAgO3	353028	Ag	Dy	4.766631	4.329439	False	False	False	False
1131	DyAlO3	354350	Al	Dy	4.760007	4.262521	False	False	False	False
1132	DyAlO3	355295	Dy	Al	4.760007	3.682341	False	False	False	False
1133	DyAsO3	353677	Dy	As	4.831476	3.988196	False	False	False	False
1134	DyAsO3	354406	As	Dy	4.831476	4.283044	False	False	False	False
1135	DyAuO3	351310	Au	Dy	4.76524	4.325695	False	False	False	False
1136	DyAuO3	353690	Dy	Au	4.76524	4.090986	False	False	False	False
1137	DyBeO3	351019	Be	Dy	4.631297	4.243362	False	False	False	False
1138	DyBeO3	352402	Dy	Be	4.631297	3.537463	False	False	False	False
1139	DyBiO3	351726	Dy	Bi	5.021548	4.360213	False	False	False	False
1140	DyBiO3	352741	Bi	Dy	5.021548	4.306744	False	False	False	False
1141	DyBO3	350703	B	Dy	4.624804	4.321751	False	False	False	False
1142	DyBO3	354651	Dy	B	4.624804	3.454388	False	False	False	False
1143	DyCdO3	350934	Dy	Cd	4.830633	4.085743	False	False	False	False
1144	DyCdO3	351993	Cd	Dy	4.830633	4.285246	False	False	False	False
1145	DyCoO3	350431	Dy	Co	4.676773	3.693473	False	False	False	False
1146	DyCoO3	354537	Co	Dy	4.676773	4.253847	False	False	False	False
1147	DyCrO3	350329	Dy	Cr	4.692421	3.820153	False	False	False	False
1148	DyCrO3	354312	Cr	Dy	4.692421	4.307761	False	False	False	False
1149	DyCuO3	350322	Dy	Cu	4.687893	3.72902	False	False	False	False
1150	DyCuO3	351617	Cu	Dy	4.687893	4.298797	False	False	False	False
1151	DyErO3	350530	Er	Dy	4.957983	4.250618	False	False	False	False
1152	DyErO3	354296	Dy	Er	4.957983	4.211628	False	False	False	False
1153	DyFeO3	351338	Fe	Dy	4.687897	4.263249	False	False	False	False
1154	DyFeO3	352777	Dy	Fe	4.687897	3.839217	False	False	False	False
1155	DyGaO3	350180	Ga	Dy	4.803635	4.35469	False	False	False	False
1156	DyGaO3	350826	Dy	Ga	4.803635	3.801942	False	False	False	False
1157	DyGeO3	351895	Dy	Ge	4.847429	3.867804	False	False	False	False
1158	DyGeO3	352268	Ge	Dy	4.847429	4.278348	False	False	False	False
1159	DyHfO3	350234	Hf	Dy	4.84186	4.234508	False	False	False	False
1160	DyHfO3	351740	Dy	Hf	4.84186	4.067159	False	False	False	False
1161	DyHgO3	350411	Dy	Hg	4.874947	4.184704	False	False	False	False
1162	DyHgO3	351651	Hg	Dy	4.874947	4.332205	False	False	False	False
1163	DyHoO3	352639	Ho	Dy	4.964809	4.257295	False	False	False	False
1164	DyHoO3	354933	Dy	Ho	4.964809	4.235971	False	False	False	False
1165	DyInO3	350701	In	Dy	4.895474	4.304395	False	False	False	False
1166	DyInO3	350946	Dy	In	4.895474	4.076097	False	False	False	False
1167	DyIrO3	353800	Dy	Ir	4.723578	3.948871	False	False	False	False
1168	DyIrO3	355245	Ir	Dy	4.723578	4.279775	False	False	False	False
1169	DyLuO3	353124	Dy	Lu	4.942904	4.147045	False	False	False	False
1170	DyLuO3	355145	Lu	Dy	4.942904	4.24826	False	False	False	False
1171	DyMgO3	353725	Mg	Dy	4.855376	4.255971	False	False	False	False
1172	DyMgO3	354040	Dy	Mg	4.855376	3.804724	False	False	False	False
1173	DyMnO3	353966	Mn	Dy	4.695233	4.258656	False	False	False	False
1174	DyMnO3	354741	Dy	Mn	4.695233	3.830194	False	False	False	False
1175	DyMoO3	350628	Mo	Dy	4.745035	4.270058	False	False	False	False
1176	DyMoO3	353764	Dy	Mo	4.745035	3.951254	False	False	False	False
1177	DyNbO3	350568	Nb	Dy	4.780441	4.249188	False	False	False	False
1178	DyNbO3	352213	Dy	Nb	4.780441	4.022557	False	False	False	False
1179	DyNiO3	354597	Ni	Dy	4.67511	6.862357	False	True	True	True
1180	DyNiO3	355138	Dy	Ni	4.67511	3.709967	False	False	False	False
1181	DyNpO3	350524	Np	Dy	4.798493	4.287674	False	False	False	False
1182	DyNpO3	352164	Dy	Np	4.798493	4.403012	False	False	False	False
1183	DyOsO3	350078	Dy	Os	4.720929	3.934412	False	False	False	False
1184	DyOsO3	352772	Os	Dy	4.720929	4.273836	False	False	False	False
1185	DyPaO3	352063	Pa	Dy	4.879831	4.279069	False	False	False	False
1186	DyPaO3	352411	Dy	Pa	4.879831	4.460976	False	False	False	False
1187	DyPbO3	349978	Pb	Dy	4.953913	4.343662	False	False	False	False
1188	DyPbO3	352305	Dy	Pb	4.953913	4.284624	False	False	False	False
1189	DyPdO3	350338	Dy	Pd	4.731829	3.949874	False	False	False	False
1190	DyPdO3	352726	Pd	Dy	4.731829	4.329569	False	False	False	False
1191	DyPtO3	350442	Pt	Dy	4.737679	4.31108	False	False	False	False
1192	DyPtO3	351817	Dy	Pt	4.737679	4.009519	False	False	False	False
1193	DyPuO3	352008	Dy	Pu	4.815474	4.359603	False	False	False	False
1194	DyPuO3	354975	Pu	Dy	4.815474	4.290984	False	False	False	False
1195	DyReO3	351858	Dy	Re	4.731953	3.943218	False	False	False	False
1196	DyReO3	352718	Re	Dy	4.731953	4.273201	False	False	False	False
1197	DyRhO3	350523	Dy	Rh	4.717915	3.912055	False	False	False	False
1198	DyRhO3	352375	Rh	Dy	4.717915	4.291286	False	False	False	False
1199	DyRuO3	354383	Ru	Dy	4.71489	4.273333	False	False	False	False
1200	DyRuO3	354510	Dy	Ru	4.71489	3.91089	False	False	False	False
1201	DySbO3	351605	Sb	Dy	4.952684	4.300535	False	False	False	False
1202	DySbO3	351823	Dy	Sb	4.952684	4.202544	False	False	False	False
1203	DyScO3	350858	Sc	Dy	4.880036	4.252175	False	False	False	False
1204	DyScO3	352148	Dy	Sc	4.880036	3.982179	False	False	False	False
1205	DySiO3	351155	Dy	Si	4.809682	3.681932	False	False	False	False
1206	DySiO3	351814	Si	Dy	4.809682	4.269082	False	False	False	False
1207	DySnO3	350221	Sn	Dy	4.908913	4.319245	False	False	False	False
1208	DySnO3	351552	Dy	Sn	4.908913	4.102755	False	False	False	False
1209	DyTaO3	351927	Dy	Ta	4.781028	4.001584	False	False	False	False
1210	DyTaO3	353085	Ta	Dy	4.781028	4.236107	False	False	False	False
1211	DyTcO3	352253	Tc	Dy	4.723614	4.266695	False	False	False	False
1212	DyTcO3	353692	Dy	Tc	4.723614	3.930157	False	False	False	False
1213	DyTeO3	351733	Te	Dy	5.003173	4.325017	False	False	False	False
1214	DyTeO3	354263	Dy	Te	5.003173	4.23	False	False	False	False
1215	DyThO3	350422	Dy	Th	4.988174	4.551687	False	False	False	False
1216	DyThO3	352039	Th	Dy	4.988174	4.282259	False	False	False	False
1217	DyTiO3	351092	Dy	Ti	4.773227	3.871195	False	False	False	False
1218	DyTiO3	354858	Ti	Dy	4.773227	4.244212	False	False	False	False
1219	DyTlO3	352731	Dy	Tl	4.930787	4.231922	False	False	False	False
1220	DyTlO3	354814	Tl	Dy	4.930787	4.413563	False	False	False	False
1221	DyTmO3	350399	Dy	Tm	4.950656	4.188041	False	False	False	False
1222	DyTmO3	353948	Tm	Dy	4.950656	4.251544	False	False	False	False
1223	DyUO3	350298	Dy	U	4.82173	4.387246	False	False	False	False
1224	DyUO3	351499	U	Dy	4.82173	4.286598	False	False	False	False
1225	DyVO3	353626	Dy	V	4.719038	3.84825	False	False	False	False
1226	DyVO3	354739	V	Dy	4.719038	4.261917	False	False	False	False
1227	DyWO3	352911	W	Dy	4.748981	4.253	False	False	False	False
1228	DyWO3	355025	Dy	W	4.748981	3.958062	False	False	False	False
1229	DyYO3	352930	Y	Dy	4.990296	4.262723	False	False	False	False
1230	DyYO3	353558	Dy	Y	4.990296	4.259217	False	False	False	False
1231	DyZnO3	350837	Zn	Dy	4.739502	4.272705	False	False	False	False
1232	DyZnO3	351444	Dy	Zn	4.739502	3.806909	False	False	False	False
1233	DyZrO3	354225	Dy	Zr	4.856246	4.121532	False	False	False	False
1234	DyZrO3	355228	Zr	Dy	4.856246	4.24324	False	False	False	False
1235	Er2O3	354088	Er	Er	4.945417	4.20994	False	False	False	False
1236	ErAgO3	351035	Ag	Er	4.753031	4.303435	False	False	False	False
1237	ErAgO3	354483	Er	Ag	4.753031	4.005503	False	False	False	False
1238	ErAlO3	351117	Er	Al	4.74637	3.66766	False	False	False	False
1239	ErAlO3	354405	Al	Er	4.74637	4.220887	False	False	False	False
1240	ErAsO3	350417	As	Er	4.818241	4.240852	False	False	False	False
1241	ErAsO3	351010	Er	As	4.818241	3.98098	False	False	False	False
1242	ErAuO3	351291	Au	Er	4.751633	4.300425	False	False	False	False
1243	ErAuO3	354955	Er	Au	4.751633	4.084973	False	False	False	False
1244	ErBeO3	351508	Be	Er	4.616888	4.20274	False	False	False	False
1245	ErBeO3	354333	Er	Be	4.616888	3.517605	False	False	False	False
1246	ErBiO3	351757	Bi	Er	5.0093	4.266487	False	False	False	False
1247	ErBiO3	353218	Er	Bi	5.0093	4.359379	False	False	False	False
1248	ErBO3	350579	B	Er	4.610354	4.290857	False	False	False	False
1249	ErBO3	352354	Er	B	4.610354	3.433556	False	False	False	False
1250	ErCdO3	352123	Er	Cd	4.817394	4.080406	False	False	False	False
1251	ErCdO3	353498	Cd	Er	4.817394	4.250821	False	False	False	False
1252	ErCoO3	354421	Er	Co	4.662644	3.679778	False	False	False	False
1253	ErCoO3	354582	Co	Er	4.662644	4.208801	False	False	False	False
1254	ErCrO3	354387	Cr	Er	4.678386	4.272767	False	False	False	False
1255	ErCrO3	355247	Er	Cr	4.678386	3.809158	False	False	False	False
1256	ErCuO3	352348	Cu	Er	4.673831	4.279806	False	False	False	False
1257	ErCuO3	352902	Er	Cu	4.673831	3.717872	False	False	False	False
1258	ErFeO3	350119	Fe	Er	4.673835	4.120498	False	False	False	False
1259	ErFeO3	350470	Er	Fe	4.673835	3.8279	False	False	False	False
1260	ErGaO3	350624	Ga	Er	4.790246	4.303796	False	False	False	False
1261	ErGaO3	353979	Er	Ga	4.790246	3.791318	False	False	False	False
1262	ErGeO3	352271	Er	Ge	4.834281	3.858892	False	False	False	False
1263	ErGeO3	354449	Ge	Er	4.834281	4.242351	False	False	False	False
1264	ErHfO3	352755	Hf	Er	4.828682	4.186439	False	False	False	False
1265	ErHfO3	353954	Er	Hf	4.828682	4.066123	False	False	False	False
1266	ErHgO3	351659	Hg	Er	4.861948	4.293526	False	False	False	False
1267	ErHgO3	353908	Er	Hg	4.861948	4.176741	False	False	False	False
1268	ErInO3	351003	In	Er	4.882584	4.262916	False	False	False	False
1269	ErInO3	351627	Er	In	4.882584	4.083443	False	False	False	False
1270	ErIrO3	351675	Ir	Er	4.709728	4.239208	False	False	False	False
1271	ErIrO3	353321	Er	Ir	4.709728	3.941864	False	False	False	False
1272	ErLuO3	350374	Lu	Er	4.930261	4.202393	False	False	False	False
1273	ErLuO3	353176	Er	Lu	4.930261	4.139755	False	False	False	False
1274	ErMgO3	352379	Er	Mg	4.842272	3.790327	False	False	False	False
1275	ErMgO3	355202	Mg	Er	4.842272	4.216505	False	False	False	False
1276	ErMnO3	350585	Mn	Er	4.681215	4.220458	False	False	False	False
1277	ErMnO3	354516	Er	Mn	4.681215	3.819866	False	False	False	False
1278	ErMoO3	352018	Mo	Er	4.731311	4.224322	False	False	False	False
1279	ErMoO3	354209	Er	Mo	4.731311	3.946361	False	False	False	False
1280	ErNbO3	353167	Nb	Er	4.766921	4.199515	False	False	False	False
1281	ErNbO3	353475	Er	Nb	4.766921	4.019918	False	False	False	False
1282	ErNiO3	352900	Ni	Er	4.660971	4.225907	False	False	False	True
1283	ErNiO3	353643	Er	Ni	4.660971	3.695776	False	False	False	False
1284	ErNpO3	350688	Er	Np	4.785074	4.40038	False	False	False	False
1285	ErNpO3	354766	Np	Er	4.785074	4.244072	False	False	False	False
1286	ErOsO3	350380	Er	Os	4.707065	3.928706	False	False	False	False
1287	ErOsO3	353493	Os	Er	4.707065	4.230954	False	False	False	False
1288	ErPaO3	350574	Pa	Er	4.866858	4.240427	False	False	False	False
1289	ErPaO3	352631	Er	Pa	4.866858	4.459826	False	False	False	False
1290	ErPbO3	352584	Er	Pb	4.941326	4.272818	False	False	False	False
1291	ErPbO3	352974	Pb	Er	4.941326	4.307663	False	False	False	False
1292	ErPdO3	351138	Pd	Er	4.718029	4.288064	False	False	False	False
1293	ErPdO3	352564	Er	Pd	4.718029	3.941932	False	False	False	False
1294	ErPtO3	351714	Pt	Er	4.723913	4.268744	False	False	False	False
1295	ErPtO3	353771	Er	Pt	4.723913	4.002659	False	False	False	False
1296	ErPuO3	350169	Pu	Er	4.802151	4.245847	False	False	False	False
1297	ErPuO3	351432	Er	Pu	4.802151	4.359521	False	False	False	False
1298	ErReO3	353066	Re	Er	4.718153	4.229507	False	False	False	False
1299	ErReO3	353962	Er	Re	4.718153	3.938666	False	False	False	False
1300	ErRhO3	350938	Er	Rh	4.704032	3.902404	False	False	False	False
1301	ErRhO3	352410	Rh	Er	4.704032	4.250822	False	False	False	False
1302	ErRuO3	351435	Ru	Er	4.700989	4.231852	False	False	False	False
1303	ErRuO3	352306	Er	Ru	4.700989	3.90365	False	False	False	False
1304	ErSbO3	350095	Er	Sb	4.940092	4.197909	False	False	False	False
1305	ErSbO3	354851	Sb	Er	4.940092	4.255808	False	False	False	False
1306	ErScO3	350501	Er	Sc	4.867064	3.976466	False	False	False	False
1307	ErScO3	354772	Sc	Er	4.867064	4.202617	False	False	False	False
1308	ErSiO3	350459	Si	Er	4.796326	4.235217	False	False	False	False
1309	ErSiO3	354962	Er	Si	4.796326	3.662993	False	False	False	False
1310	ErSnO3	352389	Er	Sn	4.896094	4.092276	False	False	False	False
1311	ErSnO3	353148	Sn	Er	4.896094	4.283483	False	False	False	False
1312	ErTaO3	350967	Ta	Er	4.767511	4.18833	False	False	False	False
1313	ErTaO3	353275	Er	Ta	4.767511	3.99791	False	False	False	False
1314	ErTcO3	351172	Er	Tc	4.709765	3.922812	False	False	False	False
1315	ErTcO3	352436	Tc	Er	4.709765	4.228036	False	False	False	False
1316	ErTeO3	350326	Te	Er	4.990835	4.279502	False	False	False	False
1317	ErTeO3	353279	Er	Te	4.990835	4.228629	False	False	False	False
1318	ErThO3	351494	Th	Er	4.975761	4.244276	False	False	False	False
1319	ErThO3	353120	Er	Th	4.975761	4.55132	False	False	False	False
1320	ErTiO3	354110	Er	Ti	4.759665	3.862598	False	False	False	False
1321	ErTiO3	354192	Ti	Er	4.759665	4.205222	False	False	False	False
1322	ErTlO3	350951	Er	Tl	4.918082	4.225684	False	False	False	False
1323	ErTlO3	351625	Tl	Er	4.918082	4.320977	False	False	False	False
1324	ErTmO3	350435	Er	Tm	4.938053	4.179368	False	False	False	False
1325	ErTmO3	352183	Tm	Er	4.938053	4.20566	False	False	False	False
1326	ErUO3	353631	U	Er	4.808441	4.243656	False	False	False	False
1327	ErUO3	354123	Er	U	4.808441	4.38256	False	False	False	False
1328	ErVO3	354636	Er	V	4.705162	3.838796	False	False	False	False
1329	ErVO3	354756	V	Er	4.705162	4.227523	False	False	False	False
1330	ErWO3	351668	W	Er	4.73528	4.203171	False	False	False	False
1331	ErWO3	352692	Er	W	4.73528	3.954915	False	False	False	False
1332	ErZnO3	354272	Er	Zn	4.725746	3.791725	False	False	False	False
1333	ErZnO3	354750	Zn	Er	4.725746	4.241194	False	False	False	False
1334	ErZrO3	350690	Zr	Er	4.843146	4.196115	False	False	False	False
1335	ErZrO3	351439	Er	Zr	4.843146	4.118661	False	False	False	False
1336	Eu2O3	350233	Eu	Eu	5.382378	4.19965	False	False	False	False
1337	EuAgO3	350664	Ag	Eu	4.998206	4.409008	False	False	False	False
1338	EuAgO3	351876	Eu	Ag	4.998206	4.004711	False	False	False	False
1339	EuAlO3	350025	Al	Eu	4.992183	4.209104	False	False	False	False
1340	EuAlO3	353793	Eu	Al	4.992183	3.723533	False	False	False	False
1341	EuAsO3	350237	As	Eu	5.057286	4.241304	False	False	False	False
1342	EuAsO3	350361	Eu	As	5.057286	3.876646	False	False	False	False
1343	EuAuO3	350845	Au	Eu	4.996941	4.224079	False	False	False	False
1344	EuAuO3	351500	Eu	Au	4.996941	4.035489	False	False	False	False
1345	EuBeO3	354247	Eu	Be	4.875602	3.583365	False	False	False	False
1346	EuBeO3	354438	Be	Eu	4.875602	4.146961	False	False	False	False
1347	EuBiO3	351864	Bi	Eu	5.231601	4.304798	False	False	False	False
1348	EuBiO3	354996	Eu	Bi	5.231601	4.28107	False	False	False	False
1349	EuBO3	354700	B	Eu	4.869744	4.433927	False	False	False	False
1350	EuBO3	354877	Eu	B	4.869744	3.469119	False	False	False	False
1351	EuCdO3	352661	Eu	Cd	5.056518	4.081602	False	False	False	False
1352	EuCdO3	353569	Cd	Eu	5.056518	4.205941	False	False	False	False
1353	EuCoO3	353537	Co	Eu	4.916691	4.172729	False	False	False	False
1354	EuCoO3	353571	Eu	Co	4.916691	3.730406	False	False	False	False
1355	EuCrO3	354140	Cr	Eu	4.930855	4.339151	False	False	False	False
1356	EuCrO3	354151	Eu	Cr	4.930855	3.780568	False	False	False	False
1357	EuCuO3	350323	Cu	Eu	4.926756	4.223741	False	False	False	False
1358	EuCuO3	351215	Eu	Cu	4.926756	3.755315	False	False	False	False
1359	EuDyO3	352258	Dy	Eu	5.184612	4.251113	False	False	False	False
1360	EuDyO3	354667	Eu	Dy	5.184612	4.273401	False	False	False	False
1361	EuErO3	350542	Er	Eu	5.173125	4.246535	False	False	False	False
1362	EuErO3	353970	Eu	Er	5.173125	4.231818	False	False	False	False
1363	EuFeO3	351162	Eu	Fe	4.926759	3.775604	False	False	False	False
1364	EuFeO3	351667	Fe	Eu	4.926759	4.158994	False	False	False	False
1365	EuGaO3	351784	Ga	Eu	5.031896	4.420513	False	False	False	False
1366	EuGaO3	352474	Eu	Ga	5.031896	3.835986	False	False	False	False
1367	EuGdO3	353295	Eu	Gd	5.203315	4.317877	False	False	False	False
1368	EuGdO3	353557	Gd	Eu	5.203315	4.259184	False	False	False	False
1369	EuGeO3	351125	Eu	Ge	5.071853	3.750348	False	False	False	False
1370	EuGeO3	351388	Ge	Eu	5.071853	4.190366	False	False	False	False
1371	EuHfO3	351920	Hf	Eu	5.066767	4.241314	False	False	False	False
1372	EuHfO3	353045	Eu	Hf	5.066767	4.067005	False	False	False	False
1373	EuHgO3	351445	Eu	Hg	5.097007	4.130506	False	False	False	False
1374	EuHgO3	351956	Hg	Eu	5.097007	4.231673	False	False	False	False
1375	EuHoO3	351530	Eu	Ho	5.179396	4.250289	False	False	False	False
1376	EuHoO3	351553	Ho	Eu	5.179396	4.248357	False	False	False	False
1377	EuInO3	352819	In	Eu	5.115795	4.251623	False	False	False	False
1378	EuInO3	354842	Eu	In	5.115795	4.096601	False	False	False	False
1379	EuIrO3	353864	Eu	Ir	4.959098	3.919013	False	False	False	False
1380	EuIrO3	355033	Ir	Eu	4.959098	4.287633	False	False	False	False
1381	EuLuO3	353300	Lu	Eu	5.159279	4.23916	False	False	False	False
1382	EuLuO3	355084	Eu	Lu	5.159279	4.182825	False	False	False	False
1383	EuMgO3	351283	Mg	Eu	5.079114	4.178374	False	False	False	False
1384	EuMgO3	355204	Eu	Mg	5.079114	3.882794	False	False	False	False
1385	EuMnO3	351031	Eu	Mn	4.933402	3.765936	False	False	False	False
1386	EuMnO3	351729	Mn	Eu	4.933402	4.181341	False	False	False	False
1387	EuMoO3	353565	Mo	Eu	4.978577	4.19772	False	False	False	False
1388	EuMoO3	354947	Eu	Mo	4.978577	3.934743	False	False	False	False
1389	EuNbO3	353465	Eu	Nb	5.010771	4.013404	False	False	False	False
1390	EuNbO3	353693	Nb	Eu	5.010771	4.241405	False	False	False	False
1391	EuNiO3	350608	Ni	Eu	4.915187	4.18385	False	False	False	True
1392	EuNiO3	354602	Eu	Ni	4.915187	3.74173	False	False	False	False
1393	EuNpO3	352286	Eu	Np	5.02721	4.376554	False	False	False	False
1394	EuNpO3	353110	Np	Eu	5.02721	4.279822	False	False	False	False
1395	EuOsO3	353774	Os	Eu	4.956695	4.271877	False	False	False	False
1396	EuOsO3	355006	Eu	Os	4.956695	3.908482	False	False	False	False
1397	EuPaO3	351234	Eu	Pa	5.101476	4.467593	False	False	False	False
1398	EuPaO3	351855	Pa	Eu	5.101476	4.29828	False	False	False	False
1399	EuPbO3	352429	Pb	Eu	5.169387	4.26684	False	False	False	False
1400	EuPbO3	355137	Eu	Pb	5.169387	4.192235	False	False	False	False
1401	EuPdO3	350367	Eu	Pd	4.966586	3.933445	False	False	False	False
1402	EuPdO3	350976	Pd	Eu	4.966586	4.357285	False	False	False	False
1403	EuPtO3	353383	Eu	Pt	4.971897	3.961202	False	False	False	False
1404	EuPtO3	354911	Pt	Eu	4.971897	4.322165	False	False	False	False
1405	EuPuO3	351554	Pu	Eu	5.042688	5.225438	False	True	True	True
1406	EuPuO3	354560	Eu	Pu	5.042688	4.349166	False	False	False	False
1407	EuReO3	352264	Re	Eu	4.966698	4.21545	False	False	False	False
1408	EuReO3	353844	Eu	Re	4.966698	3.921526	False	False	False	False
1409	EuRhO3	350650	Eu	Rh	4.953961	3.905532	False	False	False	False
1410	EuRhO3	353574	Rh	Eu	4.953961	4.314818	False	False	False	False
1411	EuRuO3	352563	Ru	Eu	4.951217	4.277062	False	False	False	False
1412	EuRuO3	352667	Eu	Ru	4.951217	3.898164	False	False	False	False
1413	EuSbO3	350413	Sb	Eu	5.168259	4.287691	False	False	False	False
1414	EuSbO3	355067	Eu	Sb	5.168259	4.132244	False	False	False	False
1415	EuScO3	352095	Eu	Sc	5.101664	4.036681	False	False	False	False
1416	EuScO3	354699	Sc	Eu	5.101664	4.233163	False	False	False	False
1417	EuSiO3	350094	Eu	Si	5.037407	3.593019	False	False	False	False
1418	EuSiO3	350189	Si	Eu	5.037407	4.196709	False	False	False	False
1419	EuSnO3	351767	Eu	Sn	5.128106	4.022464	False	False	False	False
1420	EuSnO3	353780	Sn	Eu	5.128106	4.247409	False	False	False	False
1421	EuTaO3	350900	Ta	Eu	5.011306	4.233881	False	False	False	False
1422	EuTaO3	352204	Eu	Ta	5.011306	3.992058	False	False	False	False
1423	EuTbO3	352923	Tb	Eu	5.190923	4.254495	False	False	False	False
1424	EuTbO3	353822	Eu	Tb	5.190923	4.295395	False	False	False	False
1425	EuTcO3	352883	Tc	Eu	4.959131	4.204541	False	False	False	False
1426	EuTcO3	353087	Eu	Tc	4.959131	3.897071	False	False	False	False
1427	EuTeO3	352920	Eu	Te	5.21468	4.201602	False	False	False	False
1428	EuTeO3	354171	Te	Eu	5.21468	4.300291	False	False	False	False
1429	EuThO3	350901	Eu	Th	5.200877	4.547522	False	False	False	False
1430	EuThO3	352807	Th	Eu	5.200877	4.321805	False	False	False	False
1431	EuTiO3	354349	Ti	Eu	5.004207	4.202464	False	False	False	False
1432	EuTiO3	354680	Eu	Ti	5.004207	3.866295	False	False	False	False
1433	EuTlO3	350426	Tl	Eu	5.148161	4.481189	False	False	False	False
1434	EuTlO3	351130	Eu	Tl	5.148161	4.176182	False	False	False	False
1435	EuTmO3	351066	Tm	Eu	5.166396	4.241864	False	False	False	False
1436	EuTmO3	351724	Eu	Tm	5.166396	4.211819	False	False	False	False
1437	EuUO3	351428	U	Eu	5.048394	4.276228	False	False	False	False
1438	EuUO3	354465	Eu	U	5.048394	4.399297	False	False	False	False
1439	EuVO3	351519	Eu	V	4.95498	3.802658	False	False	False	False
1440	EuVO3	352761	V	Eu	4.95498	4.204682	False	False	False	False
1441	EuWO3	350330	Eu	W	4.982162	3.942214	False	False	False	False
1442	EuWO3	351848	W	Eu	4.982162	4.250782	False	False	False	False
1443	EuYO3	352050	Eu	Y	5.202829	4.283305	False	False	False	False
1444	EuYO3	352094	Y	Eu	5.202829	4.256496	False	False	False	False
1445	EuZnO3	353342	Eu	Zn	4.973552	3.832617	False	False	False	False
1446	EuZnO3	355277	Zn	Eu	4.973552	4.169317	False	False	False	False
1447	EuZrO3	353769	Zr	Eu	5.079909	4.244289	False	False	False	False
1448	EuZrO3	354003	Eu	Zr	5.079909	4.121708	False	False	False	False
1449	Fe2O3	353416	Fe	Fe	4.366385	3.725095	False	False	False	False
1450	FeAgO3	350519	Ag	Fe	4.456789	3.789012	False	False	False	False
1451	FeAgO3	354925	Fe	Ag	4.456789	3.962319	False	False	False	False
1452	FeAsO3	352738	Fe	As	4.530743	3.758399	False	False	False	False
1453	FeAsO3	354052	As	Fe	4.530743	3.797743	False	False	False	False
1454	FeAuO3	352188	Au	Fe	4.455198	3.808621	False	False	False	False
1455	FeAuO3	353995	Fe	Au	4.455198	3.99953	False	False	False	False
1456	FeBiO3	350945	Fe	Bi	4.74519	4.189844	False	False	False	False
1457	FeBiO3	354025	Bi	Fe	4.74519	3.906164	False	False	False	False
1458	FeBO3	351557	B	Fe	4.293421	3.685425	False	False	False	False
1459	FeBO3	355261	Fe	B	4.293421	3.32192	False	False	False	False
1460	FeCoO3	351300	Co	Fe	4.353556	3.716768	False	False	False	False
1461	FeCoO3	352019	Fe	Co	4.353556	3.595008	False	False	False	False
1462	FeCuO3	352475	Fe	Cu	4.366381	4.366516	False	False	False	False
1463	FeCuO3	355045	Cu	Fe	4.366381	3.717058	False	False	False	False
1464	FeGeO3	353379	Fe	Ge	4.548872	3.69128	False	False	False	False
1465	FeGeO3	354773	Ge	Fe	4.548872	3.774294	False	False	False	False
1466	FeHgO3	351128	Fe	Hg	4.580084	4.603412	False	False	False	False
1467	FeHgO3	354747	Hg	Fe	4.580084	3.822628	False	False	False	False
1468	FeIrO3	350838	Fe	Ir	4.407441	3.870205	False	False	False	False
1469	FeIrO3	353532	Ir	Fe	4.407441	3.794726	False	False	False	False
1470	FeMoO3	352515	Mo	Fe	4.432061	3.791902	False	False	False	False
1471	FeMoO3	354425	Fe	Mo	4.432061	3.886834	False	False	False	False
1472	FeNiO3	350452	Ni	Fe	4.351637	3.757796	False	False	False	False
1473	FeNiO3	353095	Fe	Ni	4.351637	3.623058	False	False	False	False
1474	FeOsO3	350428	Os	Fe	4.404399	3.81669	False	False	False	False
1475	FeOsO3	353722	Fe	Os	4.404399	3.854006	False	False	False	False
1476	FePbO3	350803	Fe	Pb	4.669254	4.171858	False	False	False	False
1477	FePbO3	351418	Pb	Fe	4.669254	3.886544	False	False	False	False
1478	FePdO3	350566	Fe	Pd	4.416915	3.886542	False	False	False	False
1479	FePdO3	352858	Pd	Fe	4.416915	3.767922	False	False	False	False
1480	FePtO3	354241	Pt	Fe	4.423627	3.802234	False	False	False	False
1481	FePtO3	354724	Fe	Pt	4.423627	3.923016	False	False	False	False
1482	FeReO3	353201	Fe	Re	4.417056	3.922786	False	False	False	False
1483	FeReO3	354627	Re	Fe	4.417056	3.808697	False	False	False	False
1484	FeRhO3	353338	Fe	Rh	4.400935	3.858626	False	False	False	False
1485	FeRhO3	354901	Rh	Fe	4.400935	3.776459	False	False	False	False
1486	FeRuO3	350127	Ru	Fe	4.397458	3.790077	False	False	False	False
1487	FeRuO3	350564	Fe	Ru	4.397458	4.397458	True	False	True	True
1488	FeSbO3	350762	Fe	Sb	4.667871	3.97677	False	False	False	False
1489	FeSbO3	350966	Sb	Fe	4.667871	3.865868	False	False	False	False
1490	FeSiO3	351570	Si	Fe	4.505936	3.750569	False	False	False	False
1491	FeSiO3	352700	Fe	Si	4.505936	3.512037	False	False	False	False
1492	FeSnO3	350556	Sn	Fe	4.61851	3.853978	False	False	False	False
1493	FeSnO3	353647	Fe	Sn	4.61851	3.992174	False	False	False	False
1494	FeTcO3	350390	Fe	Tc	4.407483	3.854315	False	False	False	False
1495	FeTcO3	351320	Tc	Fe	4.407483	3.807045	False	False	False	False
1496	FeTeO3	351336	Fe	Te	4.724599	4.076186	False	False	False	False
1497	FeTeO3	353903	Te	Fe	4.724599	3.887977	False	False	False	False
1498	FeWO3	350751	W	Fe	4.436583	3.807749	False	False	False	False
1499	FeWO3	353439	Fe	W	4.436583	3.889577	False	False	False	False
1500	Ga2O3	351879	Ga	Ga	4.624312	3.786554	False	False	False	False
1501	GaAgO3	350315	Ag	Ga	4.584344	3.84885	False	False	False	False
1502	GaAgO3	351376	Ga	Ag	4.584344	3.984413	False	False	False	False
1503	GaAsO3	351586	Ga	As	4.654332	3.79252	False	False	False	False
1504	GaAsO3	354856	As	Ga	4.654332	3.782235	False	False	False	False
1505	GaAuO3	351532	Au	Ga	4.58284	3.843339	False	False	False	False
1506	GaAuO3	353377	Ga	Au	4.58284	4.033461	False	False	False	False
1507	GaBiO3	352457	Bi	Ga	4.858247	3.869322	False	False	False	False
1508	GaBiO3	352712	Ga	Bi	4.858247	4.2021	False	False	False	False
1509	GaBO3	353328	B	Ga	4.430421	3.780572	False	False	False	False
1510	GaBO3	355267	Ga	B	4.430421	3.334447	False	False	False	False
1511	GaCoO3	350919	Ga	Co	4.486965	4.487443	False	False	False	False
1512	GaCoO3	352120	Co	Ga	4.486965	3.778553	False	False	False	False
1513	GaCuO3	350365	Ga	Cu	4.499041	3.679657	False	False	False	False
1514	GaCuO3	353487	Cu	Ga	4.499041	3.797298	False	False	False	False
1515	GaFeO3	351789	Ga	Fe	4.499045	3.75296	False	False	False	False
1516	GaFeO3	352957	Fe	Ga	4.499045	3.734775	False	False	False	False
1517	GaGeO3	350091	Ga	Ge	4.671517	3.722487	False	False	False	False
1518	GaGeO3	350398	Ge	Ga	4.671517	3.837642	False	False	False	False
1519	GaHgO3	350451	Hg	Ga	4.701126	3.876159	False	False	False	False
1520	GaHgO3	352600	Ga	Hg	4.701126	4.135473	False	False	False	False
1521	GaIrO3	350131	Ir	Ga	4.537746	3.76272	False	False	False	False
1522	GaIrO3	352048	Ga	Ir	4.537746	3.912448	False	False	False	False
1523	GaMoO3	353518	Ga	Mo	4.560984	3.933684	False	False	False	False
1524	GaMoO3	355170	Mo	Ga	4.560984	3.768028	False	False	False	False
1525	GaNiO3	350896	Ni	Ga	4.485158	3.783465	False	False	False	False
1526	GaNiO3	353303	Ga	Ni	4.485158	3.651242	False	False	False	False
1527	GaOsO3	350613	Ga	Os	4.534876	3.89595	False	False	False	False
1528	GaOsO3	351343	Os	Ga	4.534876	3.80845	False	False	False	False
1529	GaPbO3	350944	Ga	Pb	4.785885	4.202024	False	False	False	False
1530	GaPbO3	353370	Pb	Ga	4.785885	3.913978	False	False	False	False
1531	GaPdO3	351365	Pd	Ga	4.546686	3.79954	False	False	False	False
1532	GaPdO3	354372	Ga	Pd	4.546686	3.91615	False	False	False	False
1533	GaPtO3	352853	Ga	Pt	4.553021	3.953002	False	False	False	False
1534	GaPtO3	353807	Pt	Ga	4.553021	3.812005	False	False	False	False
1535	GaReO3	351509	Re	Ga	4.546819	3.786969	False	False	False	False
1536	GaReO3	352745	Ga	Re	4.546819	3.908786	False	False	False	False
1537	GaRhO3	350368	Rh	Ga	4.531609	3.80665	False	False	False	False
1538	GaRhO3	354154	Ga	Rh	4.531609	3.89138	False	False	False	False
1539	GaRuO3	351080	Ga	Ru	4.52833	3.881586	False	False	False	False
1540	GaRuO3	351942	Ru	Ga	4.52833	3.804838	False	False	False	False
1541	GaSbO3	351132	Ga	Sb	4.784569	3.993311	False	False	False	False
1542	GaSbO3	351486	Sb	Ga	4.784569	3.838919	False	False	False	False
1543	GaSiO3	350672	Ga	Si	4.630835	3.546492	False	False	False	False
1544	GaSiO3	354067	Si	Ga	4.630835	3.79574	False	False	False	False
1545	GaSnO3	353052	Sn	Ga	4.737622	3.835159	False	False	False	False
1546	GaSnO3	353147	Ga	Sn	4.737622	4.018494	False	False	False	False
1547	GaTcO3	353983	Ga	Tc	4.537786	3.893885	False	False	False	False
1548	GaTcO3	354121	Tc	Ga	4.537786	3.78981	False	False	False	False
1549	GaTeO3	352884	Te	Ga	4.838609	3.853689	False	False	False	False
1550	GaTeO3	354017	Ga	Te	4.838609	4.082329	False	False	False	False
1551	GaWO3	351328	W	Ga	4.565254	3.771107	False	False	False	False
1552	GaWO3	351803	Ga	W	4.565254	3.938829	False	False	False	False
1553	Gd2O3	352983	Gd	Gd	5.010998	4.319177	False	False	False	False
1554	GdAgO3	351060	Ag	Gd	4.788734	4.372535	False	False	False	False
1555	GdAgO3	353744	Gd	Ag	4.788734	4.02312	False	False	False	False
1556	GdAlO3	351194	Gd	Al	4.782171	3.697989	False	False	False	False
1557	GdAlO3	354784	Al	Gd	4.782171	4.313164	False	False	False	False
1558	GdAsO3	355031	Gd	As	4.852994	4.000418	False	False	False	False
1559	GdAsO3	355240	As	Gd	4.852994	4.331835	False	False	False	False
1560	GdAuO3	350531	Au	Gd	4.787356	4.367485	False	False	False	False
1561	GdAuO3	353829	Gd	Au	4.787356	4.097819	False	False	False	False
1562	GdBeO3	352749	Be	Gd	4.654702	4.297733	False	False	False	False
1563	GdBeO3	354499	Gd	Be	4.654702	3.560876	False	False	False	False
1564	GdBiO3	353084	Gd	Bi	5.041478	4.364987	False	False	False	False
1565	GdBiO3	353336	Bi	Gd	5.041478	4.365617	False	False	False	False
1566	GdBO3	352090	B	Gd	4.648274	4.36421	False	False	False	False
1567	GdBO3	352558	Gd	B	4.648274	3.476659	False	False	False	False
1568	GdCdO3	351865	Cd	Gd	4.852159	4.331771	False	False	False	False
1569	GdCdO3	354118	Gd	Cd	4.852159	4.094343	False	False	False	False
1570	GdCoO3	350509	Gd	Co	4.699728	3.701796	False	False	False	False
1571	GdCoO3	353879	Co	Gd	4.699728	4.307673	False	False	False	False
1572	GdCrO3	350617	Gd	Cr	4.715224	3.831018	False	False	False	False
1573	GdCrO3	351890	Cr	Gd	4.715224	4.340603	False	False	False	False
1574	GdCuO3	351898	Gd	Cu	4.71074	3.74517	False	False	False	False
1575	GdCuO3	352821	Cu	Gd	4.71074	4.348708	False	False	False	False
1576	GdDyO3	350907	Gd	Dy	4.990824	4.265855	False	False	False	False
1577	GdDyO3	355103	Dy	Gd	4.990824	4.312022	False	False	False	False
1578	GdErO3	351433	Gd	Er	4.978424	4.218581	False	False	False	False
1579	GdErO3	353410	Er	Gd	4.978424	4.309272	False	False	False	False
1580	GdFeO3	352417	Gd	Fe	4.710743	3.849802	False	False	False	False
1581	GdFeO3	353650	Fe	Gd	4.710743	4.29116	False	False	False	False
1582	GdGaO3	352955	Gd	Ga	4.825402	3.815644	False	False	False	False
1583	GdGaO3	354776	Ga	Gd	4.825402	4.385928	False	False	False	False
1584	GdGeO3	350674	Gd	Ge	4.868807	3.880684	False	False	False	False
1585	GdGeO3	353127	Ge	Gd	4.868807	4.307555	False	False	False	False
1586	GdHfO3	350866	Gd	Hf	4.863287	4.072259	False	False	False	False
1587	GdHfO3	354815	Hf	Gd	4.863287	4.289459	False	False	False	False
1588	GdHgO3	353470	Hg	Gd	4.896085	4.372955	False	False	False	False
1589	GdHgO3	354446	Gd	Hg	4.896085	4.191294	False	False	False	False
1590	GdHoO3	351450	Ho	Gd	4.985194	4.311943	False	False	False	False
1591	GdHoO3	353789	Gd	Ho	4.985194	4.24292	False	False	False	False
1592	GdInO3	352671	Gd	In	4.916437	4.049652	False	False	False	False
1593	GdInO3	353182	In	Gd	4.916437	4.352521	False	False	False	False
1594	GdIrO3	352079	Gd	Ir	4.746083	3.957703	False	False	False	False
1595	GdIrO3	353067	Ir	Gd	4.746083	4.324272	False	False	False	False
1596	GdLuO3	352794	Lu	Gd	4.963469	4.305231	False	False	False	False
1597	GdLuO3	355088	Gd	Lu	4.963469	4.154854	False	False	False	False
1598	GdMgO3	350771	Gd	Mg	4.876684	3.819609	False	False	False	False
1599	GdMgO3	354410	Mg	Gd	4.876684	4.306889	False	False	False	False
1600	GdMnO3	351007	Mn	Gd	4.718009	4.306129	False	False	False	False
1601	GdMnO3	352997	Gd	Mn	4.718009	3.842146	False	False	False	False
1602	GdMoO3	351448	Mo	Gd	4.767339	4.319978	False	False	False	False
1603	GdMoO3	355293	Gd	Mo	4.767339	3.957942	False	False	False	False
1604	GdNbO3	352456	Nb	Gd	4.802418	4.303697	False	False	False	False
1605	GdNbO3	355101	Gd	Nb	4.802418	4.027787	False	False	False	False
1606	GdNiO3	351178	Gd	Ni	4.698081	3.726983	False	False	False	False
1607	GdNiO3	353141	Ni	Gd	4.698081	4.955766	False	True	True	True
1608	GdNpO3	351949	Np	Gd	4.820306	4.337863	False	False	False	False
1609	GdNpO3	354997	Gd	Np	4.820306	4.423086	False	False	False	False
1610	GdOsO3	352390	Gd	Os	4.74346	3.941057	False	False	False	False
1611	GdOsO3	354470	Os	Gd	4.74346	4.321669	False	False	False	False
1612	GdPaO3	350647	Pa	Gd	4.900927	4.328406	False	False	False	False
1613	GdPaO3	354823	Gd	Pa	4.900927	4.463024	False	False	False	False
1614	GdPbO3	350610	Gd	Pb	4.974387	4.264218	False	False	False	False
1615	GdPbO3	353224	Pb	Gd	4.974387	4.375638	False	False	False	False
1616	GdPdO3	350483	Pd	Gd	4.754257	4.368956	False	False	False	False
1617	GdPdO3	352989	Gd	Pd	4.754257	3.958698	False	False	False	False
1618	GdPtO3	350987	Gd	Pt	4.760052	4.015436	False	False	False	False
1619	GdPtO3	352326	Pt	Gd	4.760052	4.352963	False	False	False	False
1620	GdPuO3	350098	Gd	Pu	4.837135	4.364872	False	False	False	False
1621	GdPuO3	351822	Pu	Gd	4.837135	4.371915	False	False	False	False
1622	GdReO3	351933	Gd	Re	4.754379	3.949598	False	False	False	False
1623	GdReO3	352013	Re	Gd	4.754379	4.317949	False	False	False	False
1624	GdRhO3	352686	Rh	Gd	4.740474	4.334286	False	False	False	False
1625	GdRhO3	354078	Gd	Rh	4.740474	3.920693	False	False	False	False
1626	GdRuO3	349990	Ru	Gd	4.737477	4.317954	False	False	False	False
1627	GdRuO3	351863	Gd	Ru	4.737477	3.918322	False	False	False	False
1628	GdSbO3	350052	Sb	Gd	4.973169	4.352432	False	False	False	False
1629	GdSbO3	352785	Gd	Sb	4.973169	4.211518	False	False	False	False
1630	GdScO3	350040	Sc	Gd	4.901131	4.305872	False	False	False	False
1631	GdScO3	354807	Gd	Sc	4.901131	3.99198	False	False	False	False
1632	GdSiO3	351610	Si	Gd	4.831394	4.305982	False	False	False	False
1633	GdSiO3	353073	Gd	Si	4.831394	3.701735	False	False	False	False
1634	GdSnO3	351998	Sn	Gd	4.929762	4.354186	False	False	False	False
1635	GdSnO3	354160	Gd	Sn	4.929762	4.108773	False	False	False	False
1636	GdTaO3	352330	Gd	Ta	4.803	4.006193	False	False	False	False
1637	GdTaO3	354275	Ta	Gd	4.803	4.29058	False	False	False	False
1638	GdTbO3	352917	Tb	Gd	4.997633	4.315191	False	False	False	False
1639	GdTbO3	353170	Gd	Tb	4.997633	4.291757	False	False	False	False
1640	GdTcO3	351395	Gd	Tc	4.746119	3.938178	False	False	False	False
1641	GdTcO3	354008	Tc	Gd	4.746119	4.319826	False	False	False	False
1642	GdTeO3	350427	Gd	Te	5.023249	4.235984	False	False	False	False
1643	GdTeO3	351241	Te	Gd	5.023249	4.374763	False	False	False	False
1644	GdThO3	349979	Gd	Th	5.00837	4.55206	False	False	False	False
1645	GdThO3	351303	Th	Gd	5.00837	4.336287	False	False	False	False
1646	GdTiO3	351830	Gd	Ti	4.79527	3.881122	False	False	False	False
1647	GdTiO3	353114	Ti	Gd	4.79527	4.299611	False	False	False	False
1648	GdTlO3	351280	Tl	Gd	4.951453	4.405862	False	False	False	False
1649	GdTlO3	352299	Gd	Tl	4.951453	4.236593	False	False	False	False
1650	GdTmO3	350202	Gd	Tm	4.971157	4.194616	False	False	False	False
1651	GdTmO3	354813	Tm	Gd	4.971157	4.305751	False	False	False	False
1652	GdUO3	354173	U	Gd	4.843335	4.336511	False	False	False	False
1653	GdUO3	354649	Gd	U	4.843335	4.389177	False	False	False	False
1654	GdVO3	352642	Gd	V	4.741587	3.859573	False	False	False	False
1655	GdVO3	353339	V	Gd	4.741587	4.304872	False	False	False	False
1656	GdWO3	353726	W	Gd	4.771248	4.308181	False	False	False	False
1657	GdWO3	354149	Gd	W	4.771248	3.963211	False	False	False	False
1658	GdYO3	351129	Y	Gd	5.010474	4.317009	False	False	False	False
1659	GdYO3	354471	Gd	Y	5.010474	4.265818	False	False	False	False
1660	GdZnO3	350532	Gd	Zn	4.761858	3.81991	False	False	False	False
1661	GdZnO3	354678	Zn	Gd	4.761858	4.32437	False	False	False	False
1662	GdZrO3	351954	Gd	Zr	4.877546	4.124512	False	False	False	False
1663	GdZrO3	355060	Zr	Gd	4.877546	4.298282	False	False	False	False
1664	Ge2O3	352521	Ge	Ge	4.717787	3.747008	False	False	False	False
1665	GeAsO3	350548	Ge	As	4.700939	3.868562	False	False	False	False
1666	GeAsO3	354365	As	Ge	4.700939	3.756534	False	False	False	False
1667	GeAuO3	351411	Au	Ge	4.63089	3.774402	False	False	False	False
1668	GeAuO3	353090	Ge	Au	4.63089	4.038268	False	False	False	False
1669	GeBiO3	351169	Ge	Bi	4.901075	4.262225	False	False	False	False
1670	GeBiO3	351260	Bi	Ge	4.901075	3.918296	False	False	False	False
1671	GeBO3	354463	B	Ge	4.481777	3.68184	False	False	False	False
1672	GeBO3	355081	Ge	B	4.481777	3.373723	False	False	False	False
1673	GeIrO3	350816	Ir	Ge	4.586741	3.749653	False	False	False	False
1674	GeIrO3	351484	Ge	Ir	4.586741	3.918162	False	False	False	False
1675	GeMoO3	353393	Ge	Mo	4.609488	3.935905	False	False	False	False
1676	GeMoO3	354625	Mo	Ge	4.609488	3.776095	False	False	False	False
1677	GeOsO3	350798	Os	Ge	4.583932	3.765548	False	False	False	False
1678	GeOsO3	354572	Ge	Os	4.583932	3.909502	False	False	False	False
1679	GePbO3	353545	Pb	Ge	4.83	3.862214	False	False	False	False
1680	GePbO3	354353	Ge	Pb	4.83	4.231317	False	False	False	False
1681	GePdO3	352331	Pd	Ge	4.595491	3.729808	False	False	False	False
1682	GePdO3	354375	Ge	Pd	4.595491	3.925117	False	False	False	False
1683	GePtO3	350864	Pt	Ge	4.601692	3.748733	False	False	False	False
1684	GePtO3	351621	Ge	Pt	4.601692	3.962354	False	False	False	False
1685	GeRhO3	351836	Rh	Ge	4.580734	3.729573	False	False	False	False
1686	GeRhO3	354170	Ge	Rh	4.580734	3.899531	False	False	False	False
1687	GeRuO3	351081	Ru	Ge	4.577525	3.745172	False	False	False	False
1688	GeRuO3	351715	Ge	Ru	4.577525	3.899449	False	False	False	False
1689	GeSbO3	352440	Sb	Ge	4.828708	3.870333	False	False	False	False
1690	GeSbO3	353133	Ge	Sb	4.828708	4.068423	False	False	False	False
1691	GeTeO3	352065	Ge	Te	4.881781	4.166333	False	False	False	False
1692	GeTeO3	353072	Te	Ge	4.881781	3.871688	False	False	False	False
1693	GeWO3	353389	W	Ge	4.613669	3.786585	False	False	False	False
1694	GeWO3	354168	Ge	W	4.613669	3.941184	False	False	False	False
1695	Hf2O3	352758	Hf	Hf	4.706012	4.056412	False	False	False	False
1696	HfAgO3	352763	Ag	Hf	4.626264	4.091991	False	False	False	False
1697	HfAgO3	352859	Hf	Ag	4.626264	3.992478	False	False	False	False
1698	HfAlO3	352140	Al	Hf	4.619231	4.055965	False	False	False	False
1699	HfAlO3	354324	Hf	Al	4.619231	3.626549	False	False	False	False
1700	HfAsO3	351813	As	Hf	4.695017	4.067771	False	False	False	False
1701	HfAsO3	353394	Hf	As	4.695017	3.940992	False	False	False	False
1702	HfAuO3	351806	Au	Hf	4.624787	4.090952	False	False	False	False
1703	HfAuO3	354790	Hf	Au	4.624787	4.064406	False	False	False	False
1704	HfBeO3	353628	Hf	Be	4.482194	3.411276	False	False	False	False
1705	HfBeO3	355098	Be	Hf	4.482194	4.024421	False	False	False	False
1706	HfBiO3	350696	Hf	Bi	4.895628	4.312412	False	False	False	False
1707	HfBiO3	353280	Bi	Hf	4.895628	4.131481	False	False	False	False
1708	HfBO3	352221	Hf	B	4.47526	3.398743	False	False	False	False
1709	HfBO3	353452	B	Hf	4.47526	4.079493	False	False	False	False
1710	HfCdO3	350697	Hf	Cd	4.694125	4.070213	False	False	False	False
1711	HfCdO3	351969	Cd	Hf	4.694125	4.070879	False	False	False	False
1712	HfCoO3	350933	Co	Hf	4.530697	4.039548	False	False	False	False
1713	HfCoO3	354190	Hf	Co	4.530697	3.643668	False	False	False	False
1714	HfCrO3	352392	Hf	Cr	4.547364	3.766535	False	False	False	False
1715	HfCrO3	352497	Cr	Hf	4.547364	4.057277	False	False	False	False
1716	HfCuO3	354520	Cu	Hf	4.542543	4.060334	False	False	False	False
1717	HfCuO3	354664	Hf	Cu	4.542543	3.680546	False	False	False	False
1718	HfFeO3	350002	Hf	Fe	4.542547	3.774057	False	False	False	False
1719	HfFeO3	353922	Fe	Hf	4.542547	4.042646	False	False	False	False
1720	HfGaO3	354986	Ga	Hf	4.665519	4.07819	False	False	False	False
1721	HfGaO3	355003	Hf	Ga	4.665519	3.754798	False	False	False	False
1722	HfGeO3	351921	Ge	Hf	4.711907	4.069753	False	False	False	False
1723	HfGeO3	352544	Hf	Ge	4.711907	3.817566	False	False	False	False
1724	HfHgO3	354358	Hg	Hf	4.741015	4.095587	False	False	False	False
1725	HfHgO3	354715	Hf	Hg	4.741015	4.159831	False	False	False	False
1726	HfInO3	351622	In	Hf	4.762711	4.099056	False	False	False	False
1727	HfInO3	352875	Hf	In	4.762711	4.059862	False	False	False	False
1728	HfIrO3	351761	Ir	Hf	4.580519	4.054564	False	False	False	False
1729	HfIrO3	354862	Hf	Ir	4.580519	3.917948	False	False	False	False
1730	HfMgO3	353881	Mg	Hf	4.720316	4.043998	False	False	False	False
1731	HfMgO3	355056	Hf	Mg	4.720316	3.68214	False	False	False	False
1732	HfMnO3	353730	Mn	Hf	4.550358	4.047861	False	False	False	False
1733	HfMnO3	354351	Hf	Mn	4.550358	3.788946	False	False	False	False
1734	HfMoO3	351645	Mo	Hf	4.603328	4.063979	False	False	False	False
1735	HfMoO3	353249	Hf	Mo	4.603328	3.923795	False	False	False	False
1736	HfNbO3	351929	Hf	Nb	4.640921	4.002516	False	False	False	False
1737	HfNbO3	355223	Nb	Hf	4.640921	4.057764	False	False	False	False
1738	HfNiO3	351340	Hf	Ni	4.528925	3.665827	False	False	False	False
1739	HfNiO3	351725	Ni	Hf	4.528925	4.042863	False	False	False	False
1740	HfNpO3	350258	Np	Hf	4.660068	4.105181	False	False	False	False
1741	HfNpO3	350978	Hf	Np	4.660068	4.369616	False	False	False	False
1742	HfOsO3	350506	Os	Hf	4.577703	4.061883	False	False	False	False
1743	HfOsO3	354401	Hf	Os	4.577703	3.896715	False	False	False	False
1744	HfPaO3	350666	Pa	Hf	4.746179	4.095146	False	False	False	False
1745	HfPaO3	353707	Hf	Pa	4.746179	4.384943	False	False	False	False
1746	HfPbO3	350217	Hf	Pb	4.824391	4.230193	False	False	False	False
1747	HfPbO3	350493	Pb	Hf	4.824391	4.127208	False	False	False	False
1748	HfPdO3	354511	Pd	Hf	4.589293	4.067033	False	False	False	False
1749	HfPdO3	354730	Hf	Pd	4.589293	3.925039	False	False	False	False
1750	HfPtO3	350857	Pt	Hf	4.595511	4.063138	False	False	False	False
1751	HfPtO3	353788	Hf	Pt	4.595511	3.987479	False	False	False	False
1752	HfReO3	350396	Re	Hf	4.589424	4.076469	False	False	False	False
1753	HfReO3	353186	Hf	Re	4.589424	3.91007	False	False	False	False
1754	HfRhO3	351148	Hf	Rh	4.574496	3.880576	False	False	False	False
1755	HfRhO3	351548	Rh	Hf	4.574496	4.055294	False	False	False	False
1756	HfRuO3	350207	Hf	Ru	4.571278	3.866414	False	False	False	False
1757	HfRuO3	351633	Ru	Hf	4.571278	4.058055	False	False	False	False
1758	HfSbO3	351697	Hf	Sb	4.823096	4.147264	False	False	False	False
1759	HfSbO3	354705	Sb	Hf	4.823096	4.110376	False	False	False	False
1760	HfScO3	352518	Sc	Hf	4.746396	4.049112	False	False	False	False
1761	HfScO3	354637	Hf	Sc	4.746396	3.939211	False	False	False	False
1762	HfSiO3	351582	Hf	Si	4.671929	3.616437	False	False	False	False
1763	HfSiO3	355200	Si	Hf	4.671929	4.058372	False	False	False	False
1764	HfSnO3	350110	Hf	Sn	4.776907	4.053789	False	False	False	False
1765	HfSnO3	352067	Sn	Hf	4.776907	4.11236	False	False	False	False
1766	HfTaO3	350612	Ta	Hf	4.641544	4.055724	False	False	False	False
1767	HfTaO3	355191	Hf	Ta	4.641544	3.984085	False	False	False	False
1768	HfTcO3	353247	Hf	Tc	4.580558	3.885106	False	False	False	False
1769	HfTcO3	354322	Tc	Hf	4.580558	4.072299	False	False	False	False
1770	HfTeO3	354908	Te	Hf	4.87629	4.121535	False	False	False	False
1771	HfTeO3	354960	Hf	Te	4.87629	4.197982	False	False	False	False
1772	HfThO3	350587	Hf	Th	4.860496	4.53377	False	False	False	False
1773	HfThO3	351762	Th	Hf	4.860496	4.106681	False	False	False	False
1774	HfTiO3	351886	Ti	Hf	4.633265	4.041435	False	False	False	False
1775	HfTiO3	354538	Hf	Ti	4.633265	3.830574	False	False	False	False
1776	HfTlO3	351068	Hf	Tl	4.799998	4.20448	False	False	False	False
1777	HfTlO3	355147	Tl	Hf	4.799998	4.122431	False	False	False	False
1778	HfUO3	354413	U	Hf	4.684695	4.108727	False	False	False	False
1779	HfUO3	354968	Hf	U	4.684695	4.68512	False	False	False	False
1780	HfVO3	350539	V	Hf	4.575692	4.046327	False	False	False	False
1781	HfVO3	353325	Hf	V	4.575692	3.804387	False	False	False	False
1782	HfWO3	352951	W	Hf	4.60752	4.063076	False	False	False	False
1783	HfWO3	354585	Hf	W	4.60752	3.936657	False	False	False	False
1784	HfZnO3	352850	Zn	Hf	4.597449	4.048454	False	False	False	False
1785	HfZnO3	353013	Hf	Zn	4.597449	3.764833	False	False	False	False
1786	HfZrO3	352071	Hf	Zr	4.721236	4.109901	False	False	False	False
1787	HfZrO3	352949	Zr	Hf	4.721236	4.061172	False	False	False	False
1788	Hg2O3	354205	Hg	Hg	4.775509	4.157099	False	False	False	False
1789	HgAsO3	351912	Hg	As	4.730183	3.862243	False	False	False	False
1790	HgAsO3	352377	As	Hg	4.730183	4.14455	False	False	False	False
1791	HgAuO3	351824	Hg	Au	4.661016	4.063637	False	False	False	False
1792	HgAuO3	354801	Au	Hg	4.661016	4.150793	False	False	False	False
1793	HgBiO3	350007	Bi	Hg	4.927999	4.218269	False	False	False	False
1794	HgBiO3	350994	Hg	Bi	4.927999	4.232299	False	False	False	False
1795	HgBO3	352830	B	Hg	4.51392	4.118671	False	False	False	False
1796	HgBO3	354852	Hg	B	4.51392	3.517475	False	False	False	False
1797	HgGeO3	351565	Ge	Hg	4.746823	4.129328	False	False	False	False
1798	HgGeO3	353944	Hg	Ge	4.746823	3.787151	False	False	False	False
1799	HgIrO3	353699	Ir	Hg	4.617444	4.139605	False	False	False	False
1800	HgIrO3	353999	Hg	Ir	4.617444	3.942218	False	False	False	False
1801	HgMoO3	351652	Mo	Hg	4.639892	4.146217	False	False	False	False
1802	HgMoO3	353024	Hg	Mo	4.639892	3.960631	False	False	False	False
1803	HgOsO3	352897	Os	Hg	4.614672	4.152241	False	False	False	False
1804	HgOsO3	352961	Hg	Os	4.614672	3.927381	False	False	False	False
1805	HgPbO3	352303	Pb	Hg	4.857715	4.19466	False	False	False	False
1806	HgPbO3	354362	Hg	Pb	4.857715	4.264543	False	False	False	False
1807	HgPdO3	351891	Pd	Hg	4.626078	4.134409	False	False	False	False
1808	HgPdO3	354282	Hg	Pd	4.626078	3.964363	False	False	False	False
1809	HgPtO3	351099	Hg	Pt	4.632198	3.989363	False	False	False	False
1810	HgPtO3	352685	Pt	Hg	4.632198	4.143224	False	False	False	False
1811	HgRhO3	352051	Hg	Rh	4.611517	3.938078	False	False	False	False
1812	HgRhO3	353539	Rh	Hg	4.611517	4.135714	False	False	False	False
1813	HgRuO3	350589	Hg	Ru	4.608351	3.916767	False	False	False	False
1814	HgRuO3	352034	Ru	Hg	4.608351	4.139618	False	False	False	False
1815	HgSbO3	352399	Sb	Hg	4.856437	4.195632	False	False	False	False
1816	HgSbO3	353909	Hg	Sb	4.856437	4.041123	False	False	False	False
1817	HgTeO3	350894	Te	Hg	4.908915	4.200598	False	False	False	False
1818	HgTeO3	353797	Hg	Te	4.908915	4.12504	False	False	False	False
1819	HgWO3	350819	W	Hg	4.644019	4.146896	False	False	False	False
1820	HgWO3	354338	Hg	W	4.644019	3.965554	False	False	False	False
1821	Ho2O3	351811	Ho	Ho	4.959119	4.233063	False	False	False	False
1822	HoAgO3	351358	Ho	Ag	4.760457	4.011771	False	False	False	False
1823	HoAgO3	351844	Ag	Ho	4.760457	4.308454	False	False	False	False
1824	HoAlO3	352876	Al	Ho	4.753816	4.240336	False	False	False	False
1825	HoAlO3	353446	Ho	Al	4.753816	3.675562	False	False	False	False
1826	HoAsO3	350991	As	Ho	4.825467	4.261157	False	False	False	False
1827	HoAsO3	351541	Ho	As	4.825467	3.985196	False	False	False	False
1828	HoAuO3	350788	Au	Ho	4.759063	4.315687	False	False	False	False
1829	HoAuO3	351917	Ho	Au	4.759063	4.088106	False	False	False	False
1830	HoBeO3	351434	Be	Ho	4.624758	4.221705	False	False	False	False
1831	HoBeO3	353102	Ho	Be	4.624758	3.527117	False	False	False	False
1832	HoBiO3	350477	Ho	Bi	5.015987	4.361098	False	False	False	False
1833	HoBiO3	353816	Bi	Ho	5.015987	4.286626	False	False	False	False
1834	HoBO3	350278	Ho	B	4.618245	3.443015	False	False	False	False
1835	HoBO3	351838	B	Ho	4.618245	4.300348	False	False	False	False
1836	HoCdO3	351957	Ho	Cd	4.824623	4.083418	False	False	False	False
1837	HoCdO3	353912	Cd	Ho	4.824623	4.267332	False	False	False	False
1838	HoCoO3	351131	Co	Ho	4.67036	4.235437	False	False	False	False
1839	HoCoO3	352400	Ho	Co	4.67036	3.686101	False	False	False	False
1840	HoCrO3	351341	Cr	Ho	4.68605	4.286785	False	False	False	False
1841	HoCrO3	352662	Ho	Cr	4.68605	3.814861	False	False	False	False
1842	HoCuO3	350727	Ho	Cu	4.68151	3.725911	False	False	False	False
1843	HoCuO3	351237	Cu	Ho	4.68151	4.289522	False	False	False	False
1844	HoErO3	351469	Er	Ho	4.952278	4.228677	False	False	False	False
1845	HoErO3	355159	Ho	Er	4.952278	4.208311	False	False	False	False
1846	HoFeO3	352976	Fe	Ho	4.681514	4.491334	False	False	False	False
1847	HoFeO3	353898	Ho	Fe	4.681514	3.833302	False	False	False	False
1848	HoGaO3	350228	Ga	Ho	4.797557	4.345948	False	False	False	False
1849	HoGaO3	350695	Ho	Ga	4.797557	3.794329	False	False	False	False
1850	HoGeO3	350870	Ho	Ge	4.84146	3.859673	False	False	False	False
1851	HoGeO3	355271	Ge	Ho	4.84146	4.255217	False	False	False	False
1852	HoHfO3	354113	Ho	Hf	4.835878	4.067719	False	False	False	False
1853	HoHfO3	354624	Hf	Ho	4.835878	4.209642	False	False	False	False
1854	HoHgO3	351936	Ho	Hg	4.869045	4.180933	False	False	False	False
1855	HoHgO3	354316	Hg	Ho	4.869045	4.311484	False	False	False	False
1856	HoInO3	353601	In	Ho	4.889622	4.282152	False	False	False	False
1857	HoInO3	354905	Ho	In	4.889622	4.08905	False	False	False	False
1858	HoIrO3	352439	Ho	Ir	4.717291	3.944362	False	False	False	False
1859	HoIrO3	355055	Ir	Ho	4.717291	4.258811	False	False	False	False
1860	HoLuO3	352719	Ho	Lu	4.937164	4.146201	False	False	False	False
1861	HoLuO3	355219	Lu	Ho	4.937164	4.231015	False	False	False	False
1862	HoMgO3	352262	Ho	Mg	4.849427	3.796727	False	False	False	False
1863	HoMgO3	353292	Mg	Ho	4.849427	4.235708	False	False	False	False
1864	HoMnO3	351454	Mn	Ho	4.68887	4.237715	False	False	False	False
1865	HoMnO3	353044	Ho	Mn	4.68887	3.825168	False	False	False	False
1866	HoMoO3	350457	Mo	Ho	4.738806	4.246786	False	False	False	False
1867	HoMoO3	354979	Ho	Mo	4.738806	3.948552	False	False	False	False
1868	HoNbO3	353526	Ho	Nb	4.774304	4.021062	False	False	False	False
1869	HoNbO3	354669	Nb	Ho	4.774304	4.222438	False	False	False	False
1870	HoNiO3	354264	Ho	Ni	4.668693	3.703097	False	False	False	False
1871	HoNiO3	355013	Ni	Ho	4.668693	5.648919	False	True	True	True
1872	HoNpO3	352466	Ho	Np	4.792401	4.401315	False	False	False	False
1873	HoNpO3	352866	Np	Ho	4.792401	4.266236	False	False	False	False
1874	HoOsO3	351489	Ho	Os	4.714636	3.931339	False	False	False	False
1875	HoOsO3	354165	Os	Ho	4.714636	4.251513	False	False	False	False
1876	HoPaO3	352015	Ho	Pa	4.873941	4.461159	False	False	False	False
1877	HoPaO3	353623	Pa	Ho	4.873941	4.256217	False	False	False	False
1878	HoPbO3	352260	Ho	Pb	4.948198	4.273927	False	False	False	False
1879	HoPbO3	353618	Pb	Ho	4.948198	4.31797	False	False	False	False
1880	HoPdO3	352540	Pd	Ho	4.725565	4.308057	False	False	False	False
1881	HoPdO3	355218	Ho	Pd	4.725565	3.945703	False	False	False	False
1882	HoPtO3	350573	Pt	Ho	4.73143	4.289397	False	False	False	False
1883	HoPtO3	351205	Ho	Pt	4.73143	4.006372	False	False	False	False
1884	HoPuO3	350058	Pu	Ho	4.809426	4.267102	False	False	False	False
1885	HoPuO3	354686	Ho	Pu	4.809426	4.36102	False	False	False	False
1886	HoReO3	350817	Re	Ho	4.725688	4.250062	False	False	False	False
1887	HoReO3	352249	Ho	Re	4.725688	3.941064	False	False	False	False
1888	HoRhO3	350878	Rh	Ho	4.711613	4.270634	False	False	False	False
1889	HoRhO3	354695	Ho	Rh	4.711613	3.907795	False	False	False	False
1890	HoRuO3	354038	Ho	Ru	4.70858	3.907425	False	False	False	False
1891	HoRuO3	354097	Ru	Ho	4.70858	4.252301	False	False	False	False
1892	HoSbO3	352688	Sb	Ho	4.946967	4.277199	False	False	False	False
1893	HoSbO3	354548	Ho	Sb	4.946967	4.200551	False	False	False	False
1894	HoScO3	351958	Ho	Sc	4.874147	3.979678	False	False	False	False
1895	HoScO3	355095	Sc	Ho	4.874147	4.225655	False	False	False	False
1896	HoSiO3	353640	Si	Ho	4.803619	4.248974	False	False	False	False
1897	HoSiO3	355144	Ho	Si	4.803619	3.672317	False	False	False	False
1898	HoSnO3	351367	Sn	Ho	4.903094	4.301069	False	False	False	False
1899	HoSnO3	352145	Ho	Sn	4.903094	4.095098	False	False	False	False
1900	HoTaO3	351000	Ho	Ta	4.774892	4.000649	False	False	False	False
1901	HoTaO3	352066	Ta	Ho	4.774892	4.210435	False	False	False	False
1902	HoTcO3	353942	Ho	Tc	4.717328	3.926774	False	False	False	False
1903	HoTcO3	355280	Tc	Ho	4.717328	4.246189	False	False	False	False
1904	HoTeO3	352958	Ho	Te	4.997571	4.229759	False	False	False	False
1905	HoTeO3	353460	Te	Ho	4.997571	4.302463	False	False	False	False
1906	HoThO3	350814	Ho	Th	4.982538	4.551962	False	False	False	False
1907	HoThO3	350925	Th	Ho	4.982538	4.260248	False	False	False	False
1908	HoTiO3	350319	Ho	Ti	4.767071	3.867023	False	False	False	False
1909	HoTiO3	352599	Ti	Ho	4.767071	4.226787	False	False	False	False
1910	HoTlO3	352360	Ho	Tl	4.925019	4.228172	False	False	False	False
1911	HoTlO3	354402	Tl	Ho	4.925019	4.340527	False	False	False	False
1912	HoTmO3	350259	Ho	Tm	4.944934	4.186111	False	False	False	False
1913	HoTmO3	352133	Tm	Ho	4.944934	4.224291	False	False	False	False
1914	HoUO3	352715	U	Ho	4.815698	4.267267	False	False	False	False
1915	HoUO3	354311	Ho	U	4.815698	4.383066	False	False	False	False
1916	HoVO3	350599	Ho	V	4.71274	3.844289	False	False	False	False
1917	HoVO3	351308	V	Ho	4.71274	4.240596	False	False	False	False
1918	HoWO3	352218	Ho	W	4.742762	3.956418	False	False	False	False
1919	HoWO3	353901	W	Ho	4.742762	4.226861	False	False	False	False
1920	HoZnO3	350970	Zn	Ho	4.733258	4.254337	False	False	False	False
1921	HoZnO3	353884	Ho	Zn	4.733258	3.801889	False	False	False	False
1922	HoZrO3	351017	Zr	Ho	4.850299	4.21889	False	False	False	False
1923	HoZrO3	355117	Ho	Zr	4.850299	4.119506	False	False	False	False
1924	In2O3	352557	In	In	4.818091	4.106541	False	False	False	False
1925	InAgO3	352513	In	Ag	4.684898	4.028478	False	False	False	False
1926	InAgO3	354224	Ag	In	4.684898	4.140658	False	False	False	False
1927	InAsO3	354720	In	As	4.751977	3.895236	False	False	False	False
1928	InAsO3	354810	As	In	4.751977	4.090147	False	False	False	False
1929	InAuO3	350660	Au	In	4.683458	4.131658	False	False	False	False
1930	InAuO3	352040	In	Au	4.683458	4.075975	False	False	False	False
1931	InBiO3	351819	Bi	In	4.948089	4.141048	False	False	False	False
1932	InBiO3	354013	In	Bi	4.948089	4.272333	False	False	False	False
1933	InBO3	350436	B	In	4.537836	4.122514	False	False	False	False
1934	InBO3	352380	In	B	4.537836	3.430006	False	False	False	False
1935	InCoO3	350961	In	Co	4.591782	3.720805	False	False	False	False
1936	InCoO3	355038	Co	In	4.591782	4.076863	False	False	False	False
1937	InCuO3	351339	In	Cu	4.603315	3.732475	False	False	False	False
1938	InCuO3	354622	Cu	In	4.603315	4.105007	False	False	False	False
1939	InFeO3	353667	Fe	In	4.603319	11.691083	False	True	True	True
1940	InFeO3	354743	In	Fe	4.603319	3.995658	False	False	False	False
1941	InGaO3	351218	Ga	In	4.723189	4.098383	False	False	False	False
1942	InGaO3	354398	In	Ga	4.723189	3.901428	False	False	False	False
1943	InGeO3	354512	In	Ge	4.768466	3.801205	False	False	False	False
1944	InGeO3	355102	Ge	In	4.768466	4.101544	False	False	False	False
1945	InHgO3	351887	In	Hg	4.796894	4.168453	False	False	False	False
1946	InHgO3	352535	Hg	In	4.796894	4.139526	False	False	False	False
1947	InIrO3	353781	Ir	In	4.640308	4.100111	False	False	False	False
1948	InIrO3	354817	In	Ir	4.640308	3.956151	False	False	False	False
1949	InMoO3	354984	In	Mo	4.662537	3.9953	False	False	False	False
1950	InMoO3	355010	Mo	In	4.662537	4.083959	False	False	False	False
1951	InNiO3	352634	In	Ni	4.590057	3.694622	False	False	False	False
1952	InNiO3	353048	Ni	In	4.590057	6.903985	False	True	True	True
1953	InOsO3	353562	In	Os	4.637563	3.956748	False	False	False	False
1954	InOsO3	354354	Os	In	4.637563	4.096166	False	False	False	False
1955	InPbO3	350722	In	Pb	4.878387	4.230338	False	False	False	False
1956	InPbO3	350748	Pb	In	4.878387	4.181842	False	False	False	False
1957	InPdO3	350117	In	Pd	4.648857	3.954536	False	False	False	False
1958	InPdO3	350572	Pd	In	4.648857	4.108895	False	False	False	False
1959	InPtO3	351911	Pt	In	4.654918	4.117948	False	False	False	False
1960	InPtO3	352199	In	Pt	4.654918	3.994069	False	False	False	False
1961	InReO3	351507	Re	In	4.648985	4.09206	False	False	False	False
1962	InReO3	352542	In	Re	4.648985	3.961396	False	False	False	False
1963	InRhO3	353082	Rh	In	4.634439	4.108043	False	False	False	False
1964	InRhO3	353820	In	Rh	4.634439	3.944783	False	False	False	False
1965	InRuO3	351908	Ru	In	4.631304	4.098312	False	False	False	False
1966	InRuO3	355142	In	Ru	4.631304	3.931875	False	False	False	False
1967	InSbO3	351543	In	Sb	4.877121	4.078242	False	False	False	False
1968	InSbO3	355211	Sb	In	4.877121	4.109649	False	False	False	False
1969	InSiO3	350715	In	Si	4.729443	3.635103	False	False	False	False
1970	InSiO3	352727	Si	In	4.729443	4.092155	False	False	False	False
1971	InSnO3	352783	In	Sn	4.831964	4.052924	False	False	False	False
1972	InSnO3	352921	Sn	In	4.831964	4.141519	False	False	False	False
1973	InTcO3	353669	In	Tc	4.640346	3.947648	False	False	False	False
1974	InTcO3	354932	Tc	In	4.640346	4.095848	False	False	False	False
1975	InTeO3	351623	In	Te	4.929162	4.16049	False	False	False	False
1976	InTeO3	351779	Te	In	4.929162	4.145988	False	False	False	False
1977	InWO3	352222	In	W	4.666623	3.998397	False	False	False	False
1978	InWO3	354278	W	In	4.666623	4.075315	False	False	False	False
1979	Ir2O3	354267	Ir	Ir	4.447745	3.898257	False	False	False	False
1980	IrAuO3	351873	Au	Ir	4.494654	3.914519	False	False	False	False
1981	IrAuO3	352010	Ir	Au	4.494654	4.036881	False	False	False	False
1982	IrOsO3	350797	Ir	Os	4.444758	3.875958	False	False	False	False
1983	IrOsO3	355253	Os	Ir	4.444758	3.918801	False	False	False	False
1984	IrPbO3	351496	Ir	Pb	4.705217	4.181332	False	False	False	False
1985	IrPbO3	352026	Pb	Ir	4.705217	3.999143	False	False	False	False
1986	IrPdO3	351182	Pd	Ir	4.457049	3.877093	False	False	False	False
1987	IrPdO3	352196	Ir	Pd	4.457049	3.925828	False	False	False	False
1988	IrPtO3	351660	Ir	Pt	4.463641	3.955935	False	False	False	False
1989	IrPtO3	353401	Pt	Ir	4.463641	3.893145	False	False	False	False
1990	IrRhO3	354886	Ir	Rh	4.441357	3.884413	False	False	False	False
1991	IrRhO3	354906	Rh	Ir	4.441357	3.884093	False	False	False	False
1992	IrRuO3	350517	Ru	Ir	4.437943	3.895372	False	False	False	False
1993	IrRuO3	352501	Ir	Ru	4.437943	3.865057	False	False	False	False
1994	IrWO3	351025	W	Ir	4.476367	3.923757	False	False	False	False
1995	IrWO3	353514	Ir	W	4.476367	3.9094	False	False	False	False
1996	K2O3	353567	K	K	5.946633	4.595035	False	False	False	False
1997	KAcO3	353492	K	Ac	5.565754	4.541645	False	False	False	False
1998	KAcO3	354887	Ac	K	5.565754	4.287583	False	False	False	False
[truncated: 3,322 more rows]
