# Supplementary material for: Monitoring the role of site chemistry on the formation energy of perovskites via deep learning analysis of Hirshfeld surfaces
Source: Royal Society of Chemistry journal article supplement (doi:10.1039/d1tc01972d), 2021-01-01
Supplement: d1tc01972d3.pdf [file d1tc01972d3.pdf]

**Supporting Information for:**  
**Monitoring the Role of Site Chemistry on the Formation Energy of Perovskites via Deep Learning Analysis of Hirshfeld Surfaces**

Logan Williams<sup>1</sup>, Arpan Mukherjee<sup>1</sup>, Aparajita Dasgupta<sup>1</sup>, Krishna Rajan<sup>1\*</sup>

<sup>1</sup>Department of Materials Design and Innovation, University at Buffalo, Buffalo, NY14260-1660 USA.

\*E-mail: krajan3@buffalo.edu

**Network architecture**

The complete network architecture used for the transfer learning of the cubic perovskite formation energies in this study is listed below. The neural network was technically two networks: one consisting of layers 0-18 and used only to evaluate and process the input, and one consisting of layers 19-25 that was trained on the training data and tested on the test set. The neural network was created using the open source library Keras with Tensorflow v1.8.0 backend.<sup>1</sup>

Table S 1. Complete architecture of the neural network used in this study for the transfer learning of the cubic perovskite dataset. The network was split into 2 parts. The beginning was taken from the previous paper.<sup>2</sup> It took the atomic Hirshfeld surfaces fingerprint plots as inputs and produced a flattened feature vector as output, without performing any optimization / training. The second part was took the feature vectors as input, and was optimized to produce DFT formation energy as output using a subset of the OQMD dataset as training data.

| Layer # | Layer Type         | Output Shapes       | Parameters | Trained or From Previous |
|---------|--------------------|---------------------|------------|--------------------------|
| 0       | InputLayer         | (None, 50, 50, 1)   | 0          | From Previous            |
| 1       | Conv2D             | (None, 50, 50, 32)  | 320        | From Previous            |
| 2       | Conv2D             | (None, 50, 50, 32)  | 9248       | From Previous            |
| 3       | MaxPooling2D       | (None, 25, 25, 32)  | 0          | From Previous            |
| 4       | Dropout            | (None, 25, 25, 32)  | 0          | From Previous            |
| 5       | BatchNormalization | (None, 25, 25, 32)  | 128        | From Previous            |
| 6       | Conv2D             | (None, 25, 25, 64)  | 18496      | From Previous            |
| 7       | Conv2D             | (None, 25, 25, 64)  | 36928      | From Previous            |
| 8       | Conv2D             | (None, 25, 25, 64)  | 36928      | From Previous            |
| 9       | MaxPooling2D       | (None, 12, 12, 64)  | 0          | From Previous            |
| 10      | Dropout            | (None, 12, 12, 64)  | 0          | From Previous            |
| 11      | BatchNormalization | (None, 12, 12, 64)  | 256        | From Previous            |
| 12      | Conv2D             | (None, 12, 12, 128) | 73856      | From Previous            |
| 13      | Conv2D             | (None, 12, 12, 128) | 147584     | From Previous            |
| 14      | Conv2D             | (None, 12, 12, 128) | 147584     | From Previous            |
| 15      | Conv2D             | (None, 12, 12, 128) | 147584     | From Previous            |
| 16      | MaxPooling2D       | (None, 6, 6, 128)   | 0          | From Previous            |
| 17      | BatchNormalization | (None, 6, 6, 128)   | 512        | From Previous            |
| 18      | Flatten            | (None, 4608)        | 0          | From Previous            |
| 19      | Dense              | (None, 128)         | 589952     | Trained                  |
| 20      | Dropout            | (None, 128)         | 0          | Trained                  |
| 21      | BatchNormalization | (None, 128)         | 512        | Trained                  |
| 22      | Dense              | (None, 128)         | 16512      | Trained                  |
| 23      | Dropout            | (None, 128)         | 0          | Trained                  |
| 24      | BatchNormalization | (None, 128)         | 512        | Trained                  |
| 25      | Dense              | (None, 1)           | 129        | Trained                  |

## Compositions within cubic dataset

Not all cubic perovskite compounds in the OQMD database were included in this study. The figure below shows the compounds in the composition space that were not included as red x's. The excluded compounds met one of the criteria listed in the main paper methodology section that caused the validity of the results to be uncertain: unconverged bandgap calculation, numerically identical unrelaxed and relaxed lattice parameters, or an unreasonably large lattice parameter after relaxation.

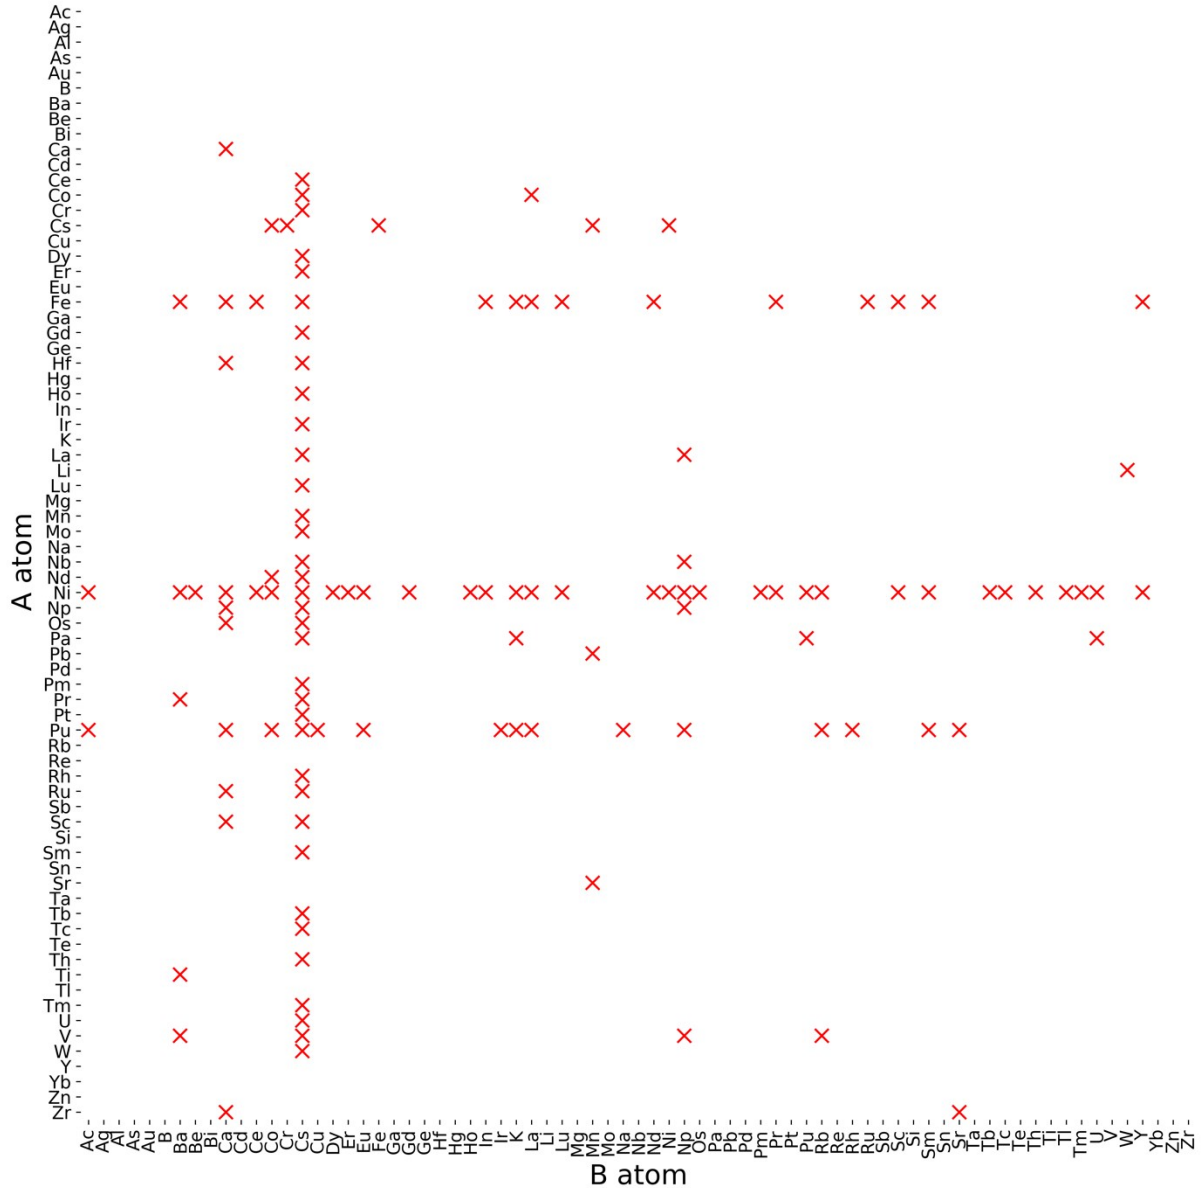

Figure S. 1. The compositions included in the cubic perovskite dataset. X's mark compositions not included in the current dataset. Many Cs compounds were excluded due to identical unrelaxed and relaxed lattice parameters, indicating a possible unnoticed failure of the relaxation calculation. Many Ni compounds failed to produce converged bandgap calculations, as well as some Fe and Pu compounds.

## Statistical plots of cubic dataset

Below are included plots showing the distribution of the formation energy in the cubic perovskite dataset with regards to the atom in the A and B sites (Figure S. 2 and Figure S. 3), the observed vs predicted values from the CNN using atomic Hirshfeld surfaces fingerprint plots (Figure S. 5 and Figure S. 6), and the distribution of errors (residuals) from the predictions in regards to the atoms on the A and B sites (Figure S. 7 and Figure S. 8)

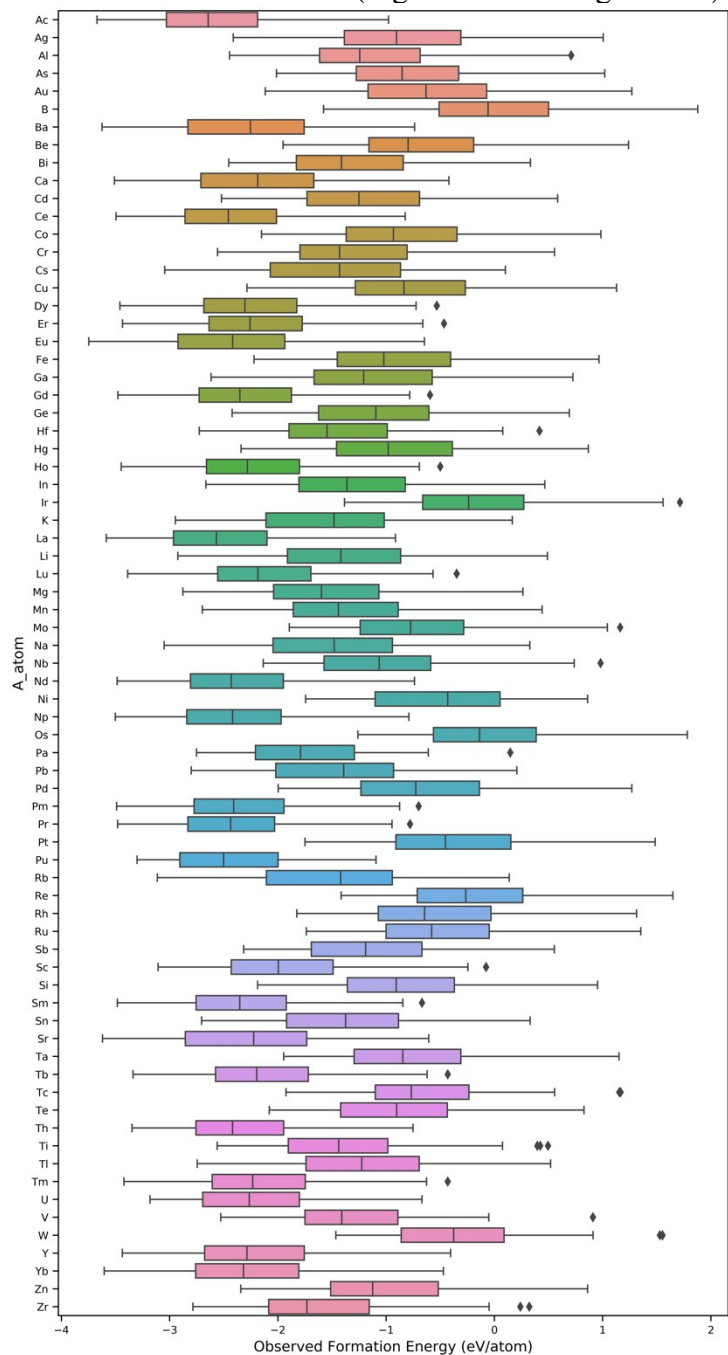

Figure S. 2. Box and whisker plot for the cubic perovskite dataset, showing distribution of DFT formation energies based on the atom in the A site.

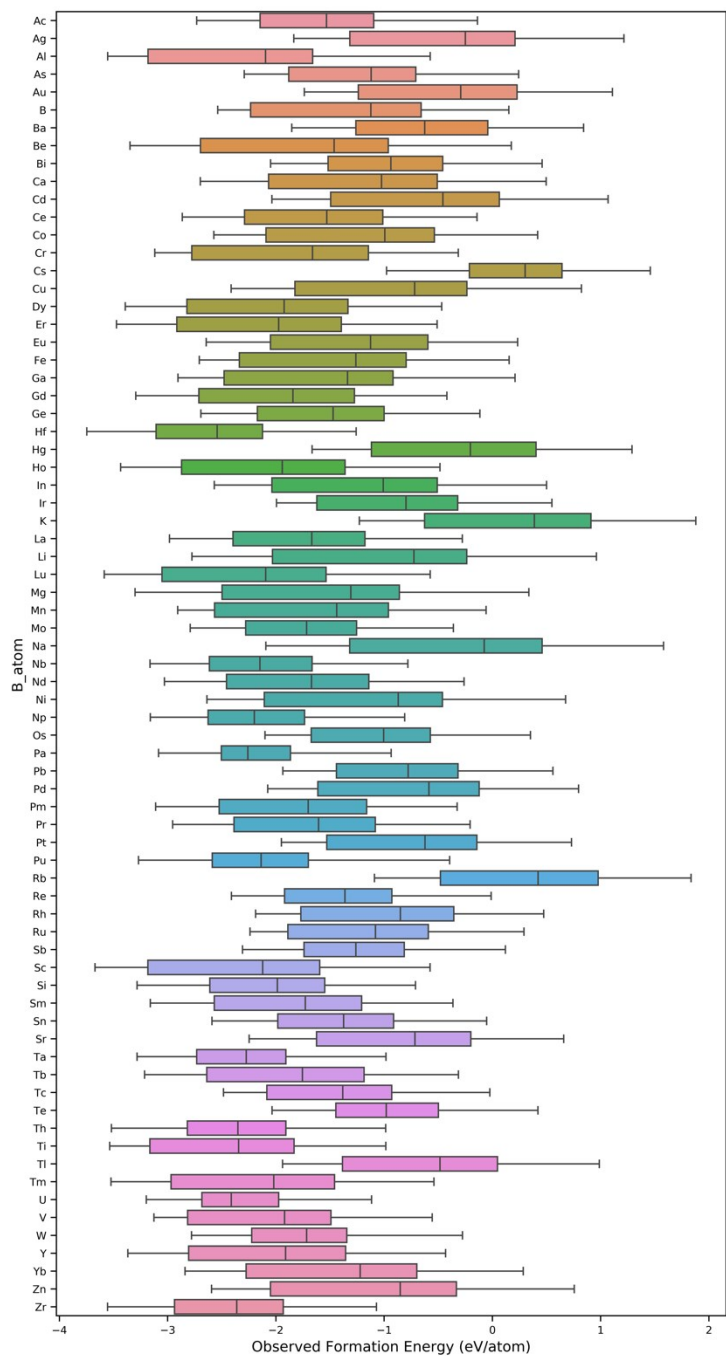

Figure S. 3. Box and whisker plot for the cubic perovskite dataset, showing distribution of DFT formation energies based on the atom in the B site.

### Schematic of the CGCNN<sup>3</sup> method used as comparison technique

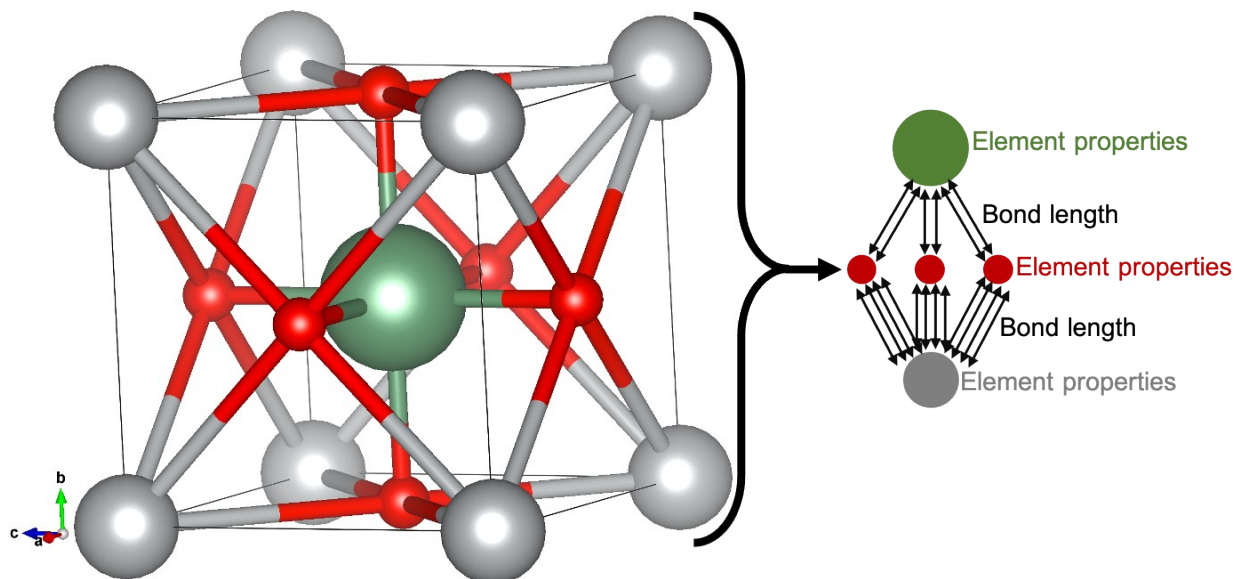

Figure S. 4. Schematic of the features and crystal graph architecture used in the CGCNN<sup>3</sup> method that our results were compared against. The CGCNN method builds a graph network based on atoms and their neighbors within a certain distance. It uses elemental descriptors for the nodes of the graph network and a function of the bond distance for the connections between the nodes of the graph network.

### Statistical plots of cubic dataset neural network results

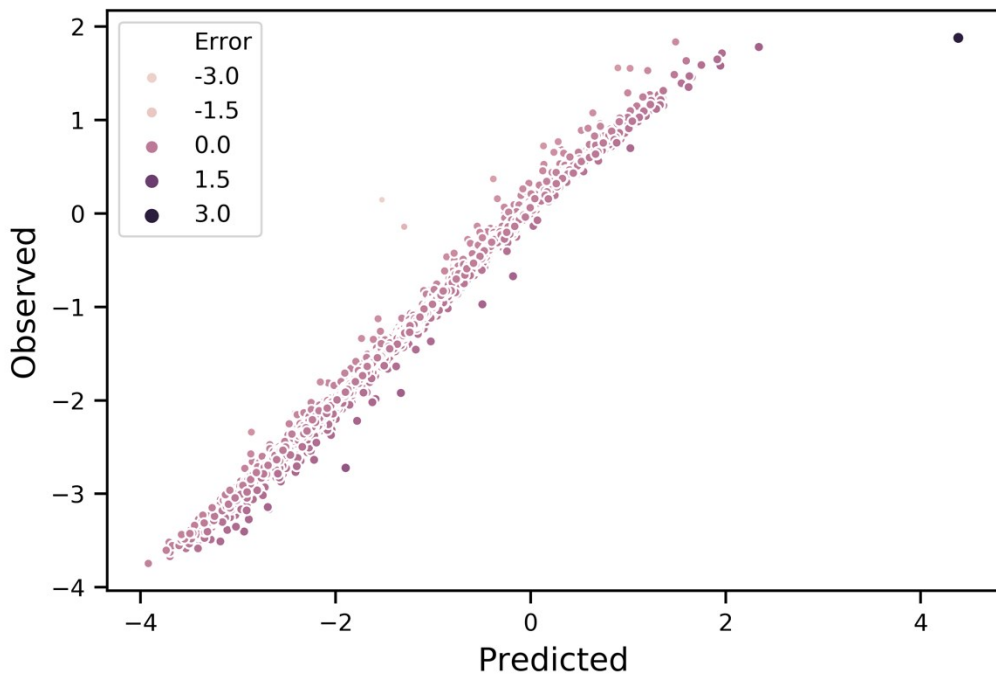

Figure S. 5. Observed vs Predicted plot for the HFS+CNN prediction of cubic perovskite DFT-calculated formation energy, showing the size of the error for each datapoint.

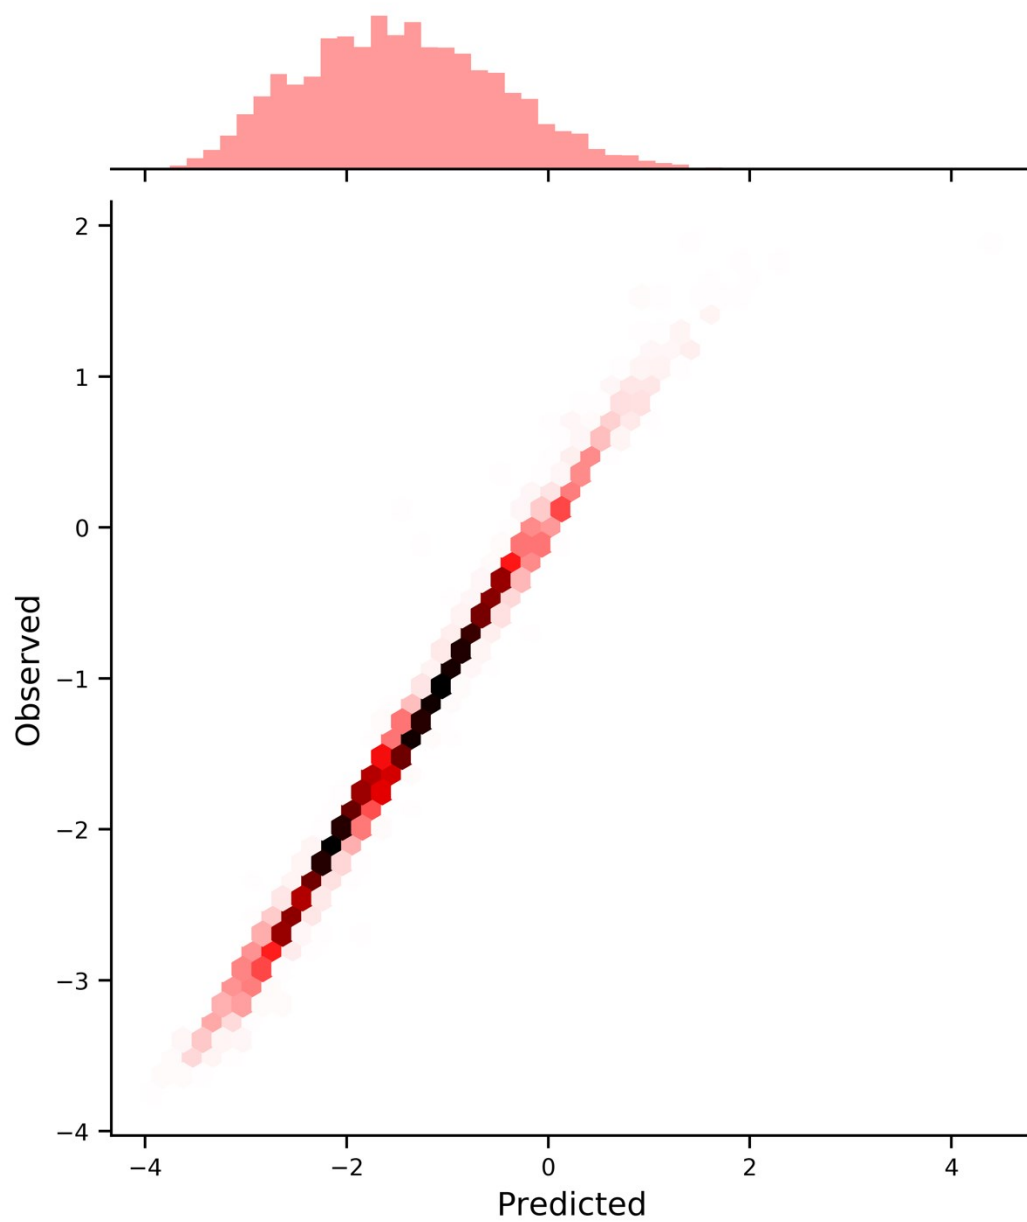

Figure S. 6. Observed vs Predicted plot for the HFS+CNN prediction of cubic perovskite DFT-calculated formation energy, showing the distributions of the dataset and the predictions on the sides of the axes.

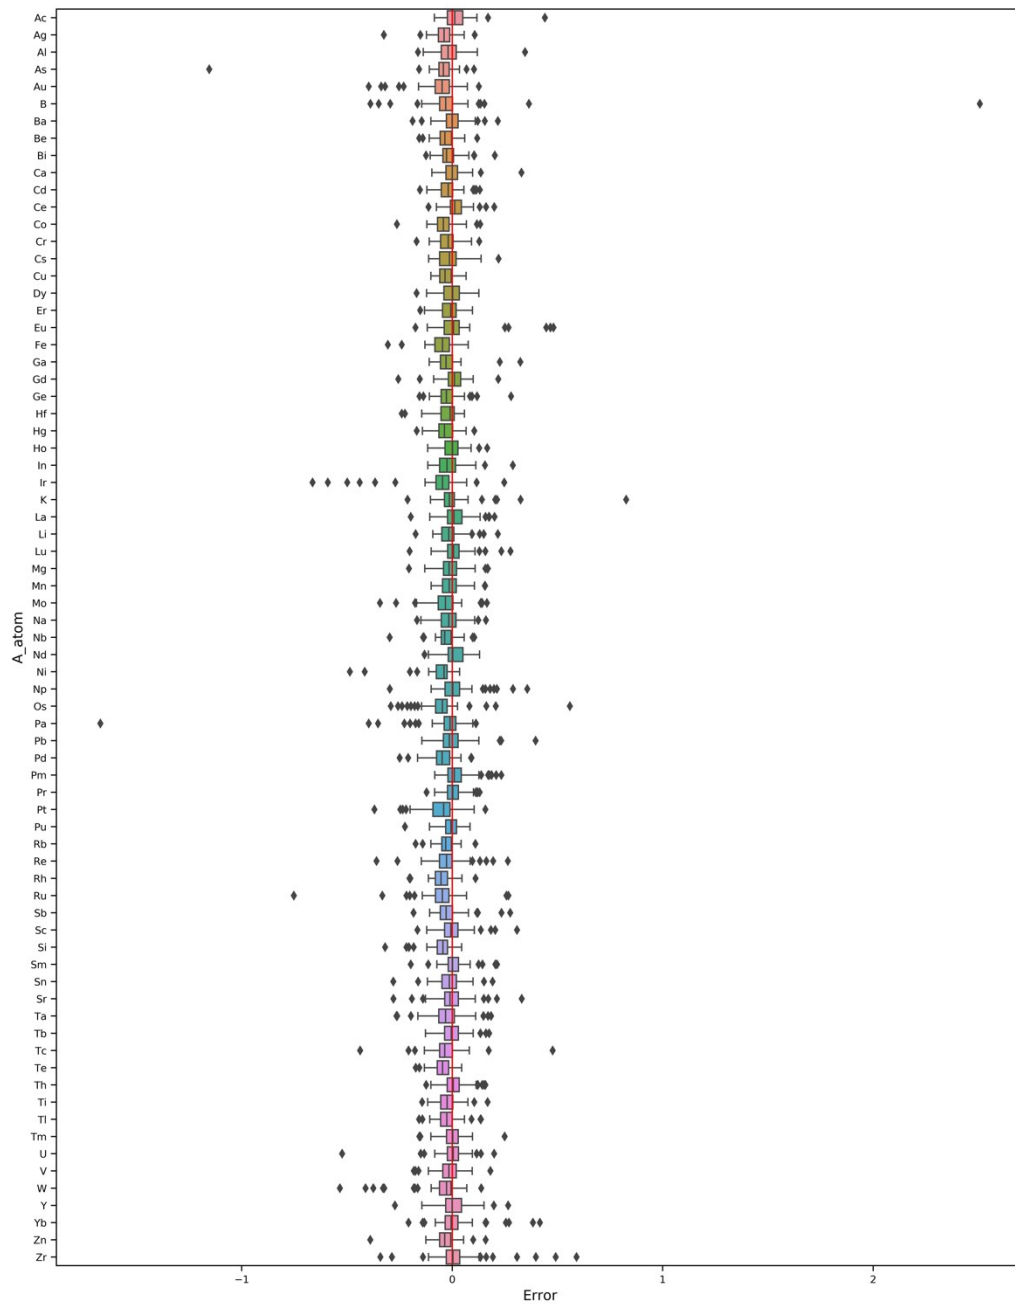

Figure S. 7. Box and whisker plot showing the distribution of the errors from the CNN built on atomic Hirshfeld surface fingerprint plots upon the cubic perovskite dataset based on the atom in the A site. Most systems have highly accurate predictions and large outliers are rare. A few atomic species contain small clusters of small-magnitude outliers.



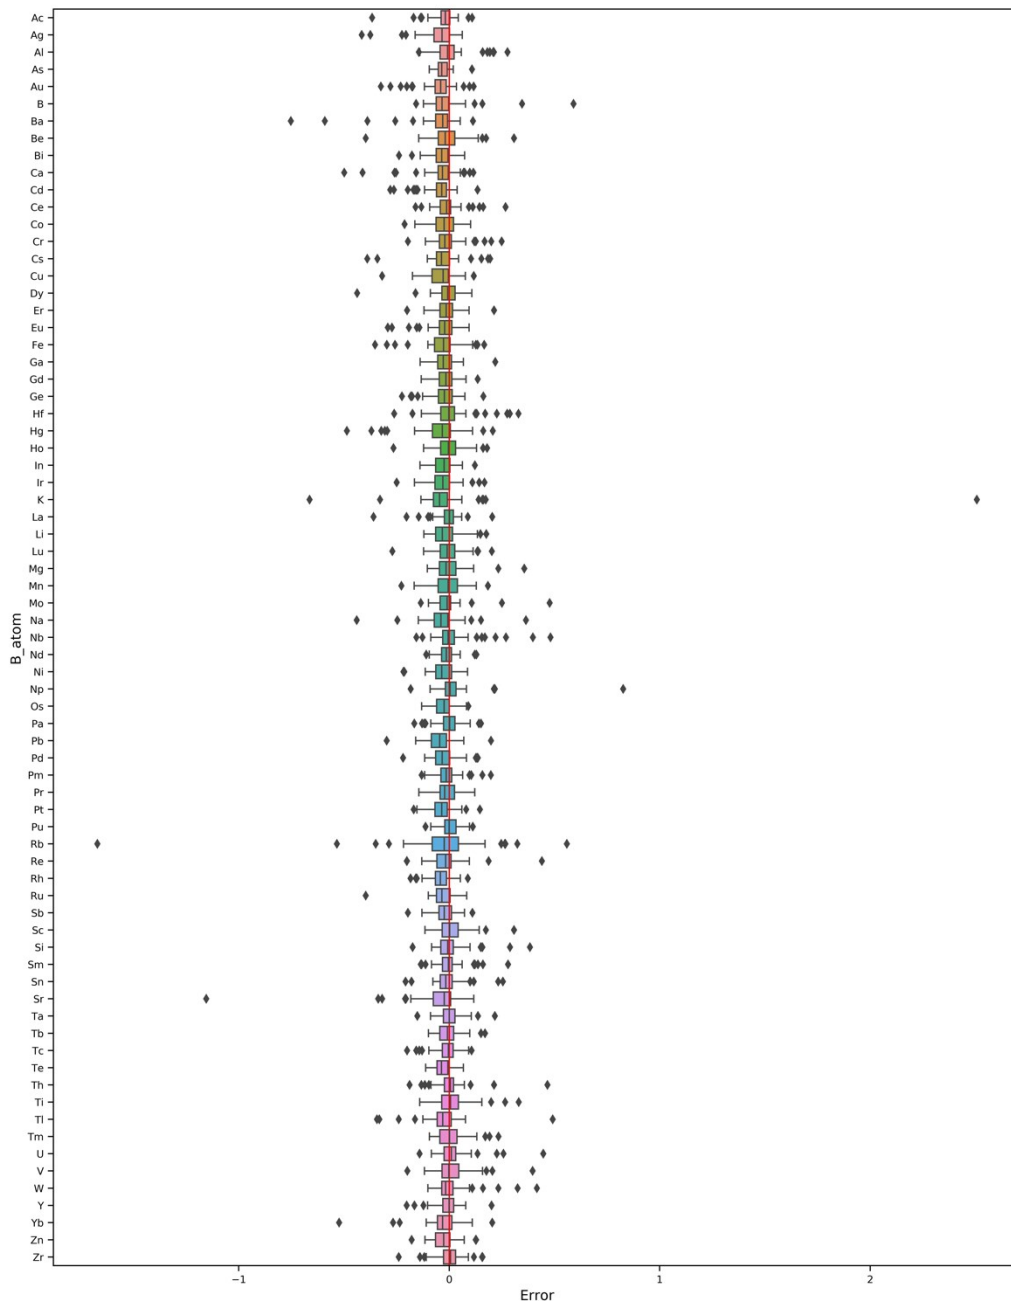

Figure S. 8. Box and whisker plot showing the distribution of the errors from the CNN built on atomic Hirshfeld surface fingerprint plots upon the cubic perovskite dataset based on the atom in the B site. Most systems have highly accurate predictions and large outliers are rare. A few atomic species contain small clusters of small-magnitude outliers.

### Tables of outliers for cubic dataset

Below are tables showing the largest outliers for: the CNN based on atomic Hirshfeld surfaces fingerprint plots to predict DFT Formation Energy of the cubic perovskite dataset (Table S 2), the CNN from the prior work<sup>2</sup> based on atomic Hirshfeld surfaces fingerprint plots to predict lattice parameter (Table S 3), that same CNN but with the systematic bias towards estimating towards the mean subtracted out by fitting a linear function to the bias (Table S 4), and the CGCNN prediction of DFT Formation Energy (Table S 5).

Table S 2. Outliers from the CNN prediction of OQMD formation energy of cubic perovskites based on the atomic Hirshfeld surface fingerprint plots that are over 0.5 eV/atom in magnitude. 8 of the 11 outliers contain either Ba, K, Rb, or Sr in the B site. All of these are group 1 or 2 elements and possess similar atomic size (~215-248 pm).

| Formula | OQMD ID | A atom | B atom | DFT Energy [eV/atom] | Test or Train | CNN Prediction | CNN Residual |
|---------|---------|--------|--------|----------------------|---------------|----------------|--------------|
| BaIrO3  | 354509  | Ir     | Ba     | 0.72301              | Train         | 0.13193        | -0.59108     |
| BaRuO3  | 351592  | Ru     | Ba     | 0.36980              | Train         | -0.38285       | -0.75265     |
| KBO3    | 354529  | B      | K      | 1.87903              | Train         | 4.38580        | 2.50677      |
| KIrO3   | 351163  | Ir     | K      | 1.55826              | Test          | 0.89468        | -0.66358     |
| KNpO3   | 353363  | K      | Np     | -2.72349             | Test          | -1.89679       | 0.82670      |
| RbOsO3  | 354598  | Os     | Rb     | 1.78189              | Test          | 2.34054        | 0.55864      |
| RbPaO3  | 350010  | Pa     | Rb     | 0.14691              | Test          | -1.52488       | -1.67180     |
| RbWO3   | 350721  | W      | Rb     | 1.55350              | Train         | 1.01992        | -0.53358     |
| SrAsO3  | 353710  | As     | Sr     | -0.14189             | Train         | -1.29662       | -1.15473     |
| YbUO3   | 352722  | U      | Yb     | -2.34077             | Test          | -2.86392       | -0.52314     |
| ZrBO3   | 353529  | Zr     | B      | -1.92102             | Train         | -1.33074       | 0.59028      |

The majority (8 of 11) of the large (0.5 eV/atom or greater) outliers from the CNN based on atomic Hirshfeld surfaces fingerprint plots came from compounds with Ba, K, Rb, or Sr in the B site. Although there is significantly more noise in this subset of data than the whole dataset (particularly for the less energetically favorable compounds), it can be seen in Figure S. 9 that the model still makes accurate predictions for many of the compounds containing these elements.

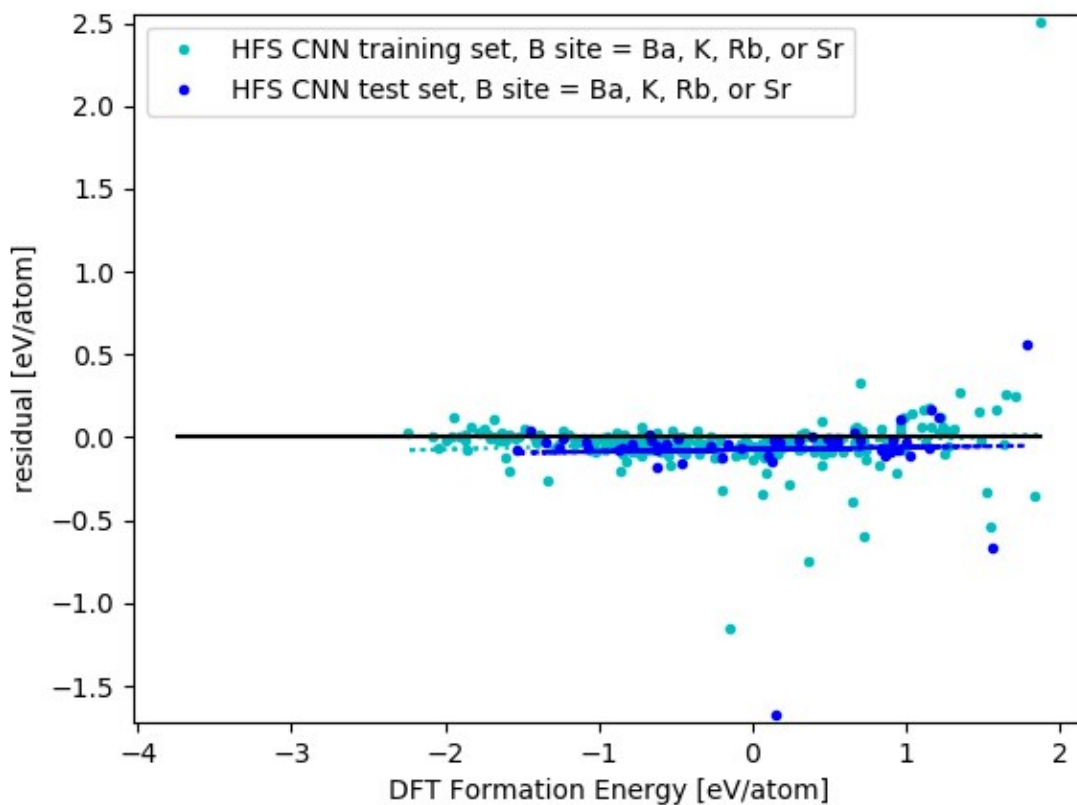

Figure S. 9. Residuals vs DFT calculated system energy for cubic perovskites with either Ba, K, Rb, or Sr in the B site.

Table S 3. Major outliers (error greater than or equal to 0.13 Å in magnitude) for the CNN predicting lattice parameter from our previous work.<sup>2</sup> All are low lattice parameter structures with small elements on the B site.

| Formula | OQMD ID | A atom | B atom | Unrelaxed Lattice Parameter | Relaxed Lattice Parameter | CNN Prediction | CNN Residual |
|---------|---------|--------|--------|-----------------------------|---------------------------|----------------|--------------|
| BeNbO3  | 354613  | Nb     | Be     | 4.4103                      | 3.4055                    | 3.5672         | 0.1617       |
| BeOsO3  | 354294  | Os     | Be     | 4.3401                      | 3.4085                    | 3.5419         | 0.1334       |
| BeSnO3  | 352081  | Sn     | Be     | 4.5602                      | 3.5103                    | 3.6471         | 0.1368       |
| BiBO3   | 355209  | Bi     | B      | 4.6836                      | 3.5562                    | 3.6887         | 0.1325       |
| BSbO3   | 351589  | Sb     | B      | 4.6042                      | 3.4912                    | 3.6487         | 0.1575       |
| BTeO3   | 353061  | Te     | B      | 4.6625                      | 3.5146                    | 3.6640         | 0.1494       |
| BWO3    | 354532  | W      | B      | 4.3660                      | 3.4006                    | 3.5996         | 0.1991       |
| ErBeO3  | 354333  | Er     | Be     | 4.6169                      | 3.5176                    | 3.6535         | 0.1359       |
| EuSiO3  | 350094  | Eu     | Si     | 5.0374                      | 3.5930                    | 3.7297         | 0.1367       |
| HgBO3   | 354852  | Hg     | B      | 4.5139                      | 3.5175                    | 3.6511         | 0.1337       |
| LiMgO3  | 353554  | Mg     | Li     | 4.7101                      | 3.5470                    | 3.6903         | 0.1433       |
| NbBO3   | 354617  | Nb     | B      | 4.4031                      | 3.3997                    | 3.5508         | 0.1511       |
| ReBO3   | 350783  | Re     | B      | 4.3458                      | 3.3904                    | 3.5278         | 0.1374       |
| SiRhO3  | 355285  | Rh     | Si     | 4.5384                      | 3.5693                    | 3.7039         | 0.1346       |

Table S 4. Major outliers (error greater than or equal to 0.08 Å in magnitude) for the CNN predicting lattice parameter from our previous work<sup>2</sup>, after adjustment to correct for a systematic bias towards the norm of the dataset. The results were adjusted by fitting a linear function to the predicted values of the training set vs. the observed (relaxed) values, and applying that linear function to the output from the CNN. No strong trend is seen the composition of the compounds that are the greatest outliers.

| Formula | OQMD ID | A atom | B atom | Unrelaxed Lattice Parameter | Relaxed Lattice Parameter | CNN Prediction | Adjusted CNN Prediction | Adjusted CNN residual |
|---------|---------|--------|--------|-----------------------------|---------------------------|----------------|-------------------------|-----------------------|
| AcUO3   | 353980  | Ac     | U      | 4.9045                      | 4.4655                    | 4.5380         | 4.5501                  | 0.0846                |
| BaSmO3  | 354376  | Ba     | Sm     | 5.3869                      | 4.4759                    | 4.5589         | 4.5727                  | 0.0968                |
| BeNbO3  | 354613  | Nb     | Be     | 4.4103                      | 3.4055                    | 3.5672         | 3.5036                  | 0.0981                |
| BSbO3   | 351589  | Sb     | B      | 4.6042                      | 3.4912                    | 3.6487         | 3.5914                  | 0.1002                |
| BTeO3   | 353061  | Te     | B      | 4.6625                      | 3.5146                    | 3.6640         | 3.6080                  | 0.0933                |
| BWO3    | 354532  | W      | B      | 4.3660                      | 3.4006                    | 3.5996         | 3.5385                  | 0.1380                |
| CaBeO3  | 350609  | Be     | Ca     | 4.8057                      | 4.1106                    | 4.0540         | 4.0284                  | -0.0822               |
| CaHfO3  | 351137  | Ca     | Hf     | 5.0022                      | 4.0735                    | 4.0199         | 3.9916                  | -0.0819               |
| CaMnO3  | 354167  | Mn     | Ca     | 4.8652                      | 4.2177                    | 4.1304         | 4.1107                  | -0.1070               |
| EuSiO3  | 350094  | Eu     | Si     | 5.0374                      | 3.5930                    | 3.7297         | 3.6788                  | 0.0857                |
| GdLuO3  | 352794  | Lu     | Gd     | 4.9635                      | 4.3052                    | 4.3944         | 4.3953                  | 0.0901                |
| GdPbO3  | 353224  | Pb     | Gd     | 4.9744                      | 4.3756                    | 4.4540         | 4.4596                  | 0.0840                |
| InWO3   | 354278  | W      | In     | 4.6666                      | 4.0753                    | 4.0219         | 3.9938                  | -0.0815               |
| LiMgO3  | 353554  | Mg     | Li     | 4.7101                      | 3.5470                    | 3.6903         | 3.6363                  | 0.0893                |
| NaSnO3  | 353611  | Sn     | Na     | 5.0139                      | 3.9767                    | 4.0867         | 4.0636                  | 0.0869                |
| NbBO3   | 354617  | Nb     | B      | 4.4031                      | 3.3997                    | 3.5508         | 3.4859                  | 0.0862                |
| PuUO3   | 351925  | U      | Pu     | 4.6565                      | 4.4414                    | 4.5137         | 4.5240                  | 0.0826                |
| ScUO3   | 351981  | U      | Sc     | 4.7254                      | 4.0296                    | 3.9636         | 3.9309                  | -0.0987               |
| SiRhO3  | 355285  | Rh     | Si     | 4.5384                      | 3.5693                    | 3.7039         | 3.6509                  | 0.0817                |
| SmHfO3  | 353183  | Hf     | Sm     | 4.8651                      | 4.3585                    | 4.4394         | 4.4439                  | 0.0853                |
| SrInO3  | 352151  | Sr     | In     | 5.2032                      | 4.1602                    | 4.0888         | 4.0659                  | -0.0943               |
| SrNdO3  | 351064  | Sr     | Nd     | 5.3011                      | 4.4654                    | 4.5449         | 4.5575                  | 0.0922                |
| YbHoO3  | 350358  | Yb     | Ho     | 5.0926                      | 4.2320                    | 4.3228         | 4.3181                  | 0.0861                |

Table S 5. Outliers of magnitude greater than 0.5eV/atom from the CGCNN<sup>3</sup>model's prediction of formation energy trained on the OQMD dataset of cubic perovskites. Of the 24 such outliers, 8 contained either Li, Be, or B in the B site, and 21 contained a row 6 or row 7 element.

| Formula | OQMD ID | A atom | B atom | Formation Energy [eV/atom] | Test or Train | CGCNN Prediction | CGCNN Residual |
|---------|---------|--------|--------|----------------------------|---------------|------------------|----------------|
| BeFeO3  | 353229  | Fe     | Be     | 0.17434                    | Train         | -0.89083         | -1.06517       |
| BeWO3   | 354408  | W      | Be     | -1.23241                   | Train         | -0.68311         | 0.54931        |
| CsAuO3  | 350310  | Au     | Cs     | 0.84211                    | Test          | 1.41975          | 0.57765        |
| CsBeO3  | 353894  | Cs     | Be     | -0.66301                   | Test          | -1.32627         | -0.66326       |
| CsBO3   | 352311  | Cs     | B      | -0.20764                   | Train         | -0.76268         | -0.55503       |
| CsSiO3  | 351473  | Cs     | Si     | -1.43517                   | Train         | -2.00721         | -0.57204       |
| GaCoO3  | 350919  | Ga     | Co     | 0.18812                    | Train         | -0.55871         | -0.74683       |
| HfBeO3  | 353628  | Hf     | Be     | -2.72597                   | Train         | -2.21696         | 0.50900        |
| HfMgO3  | 355056  | Hf     | Mg     | -2.32129                   | Test          | -1.79176         | 0.52953        |
| KUO3    | 352272  | K      | U      | -1.55408                   | Train         | -2.64256         | -1.08849       |
| LiHfO3  | 353246  | Hf     | Li     | -1.96830                   | Train         | -1.39820         | 0.57010        |
| LiTaO3  | 352711  | Ta     | Li     | -1.39934                   | Train         | -0.82167         | 0.57768        |
| LiWO3   | 352975  | W      | Li     | -0.64769                   | Train         | -0.00977         | 0.63792        |
| NaCrO3  | 351362  | Na     | Cr     | -0.47855                   | Train         | -1.47801         | -0.99946       |
| NiPtO3  | 353435  | Ni     | Pt     | -1.66989                   | Train         | -0.19497         | 1.47492        |
| NiWO3   | 353281  | Ni     | W      | -0.27606                   | Train         | -0.80590         | -0.52984       |
| PaTiO3  | 351202  | Tl     | Pa     | -2.56301                   | Test          | -2.04409         | 0.51893        |
| PuWO3   | 351872  | W      | Pu     | -0.39435                   | Train         | -0.93596         | -0.54161       |
| ThMgO3  | 352136  | Th     | Mg     | -3.30097                   | Train         | -2.71035         | 0.59062        |
| ThUO3   | 351718  | Th     | U      | -2.14584                   | Train         | -2.68709         | -0.54125       |
| TiIrO3  | 354340  | Ti     | Ir     | 0.07521                    | Train         | -0.68195         | -0.75716       |
| UBiO3   | 350829  | Bi     | U      | -1.71684                   | Test          | -2.25834         | -0.54150       |
| UTiO3   | 352223  | Tl     | U      | -2.74528                   | Test          | -2.13136         | 0.61392        |
| YbPaO3  | 352228  | Pa     | Yb     | -0.95121                   | Train         | -1.98884         | -1.03763       |

### **Reproducibility of cubic dataset results**

The network used in the paper was taken from the best of 5 trained networks, as determined by test set  $r^2$  value. The  $r^2$  value for the other networks were 0.966, 0.980, 0.966, and 0.976. The training set  $r^2$  values were 0.981, 0.987, 0.983, and 0.997. The decision to take the best of the 5 trained networks was made to account for the tendency of neural networks to overfit to the training data and perform notably worse upon the test set. For comparison, the CGCNN code trains 3 networks internally with a validation set used to pick the best network.

Fifty different test/train splits than the one used in the main paper were also tested afterwards, using the same initial condition for all trainings. All layers were unfrozen for the retraining. The retrained networks displayed a tendency towards overfitting half of the time, with 25 of the 50 networks overfit, either moderately or strongly. The average test set  $r^2$  of the 50 networks was 0.964 and the average training set  $r^2$  was 0.994. The test set  $r^2$  distribution for the 50 models was roughly trimodal, split into well fit, overfit, and strongly overfit categories. For the 7 networks that were strongly overfit, the average test set  $r^2$  was 0.918 and the average training set  $r^2$  was 0.994. For the 18 models that were moderately overfit, the average test set  $r^2$  was 0.951 and the average training set  $r^2$  was 0.994. For the 25 models that were well fit, the average test set  $r^2$  was 0.986 and the average training set  $r^2$  was 0.995.

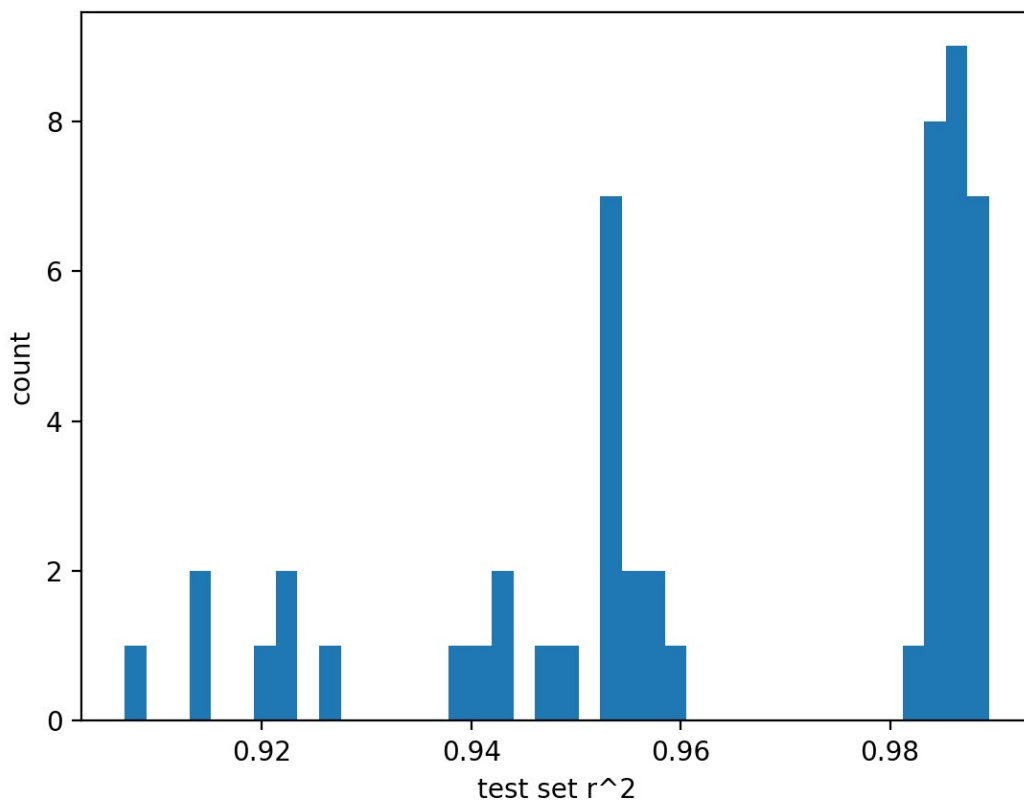

Figure S. 10. Histogram of the distribution of the test set  $r^2$  values for the 50 different test/train split retrains of the network. The test set results are trimodal, with a cluster well fit around 0.986, another ranging  $\sim 0.94$ -0.96, and a third spread around  $\sim 0.92$ .

When retraining the networks with the feature extraction layers frozen, the average test set  $r^2$  was 0.943 and the average training set  $r^2$  was 0.944, showing that using frozen feature extraction layers from a different split of the total dataset limits the accuracy of the network.

### **Histogram of perovskites within OQMD by structure prototype**

The OQMD database contains more calculated compositions using the cubic perovskite prototype than it does of the other three perovskite prototypes they use. This creates an imbalanced dataset, with many compositions either having data for all four structure types or for only the cubic structure. To create a dataset more suitable for machine learning, the dataset was restricted to only compositions where non-cubic structures were also calculated within OQMD.

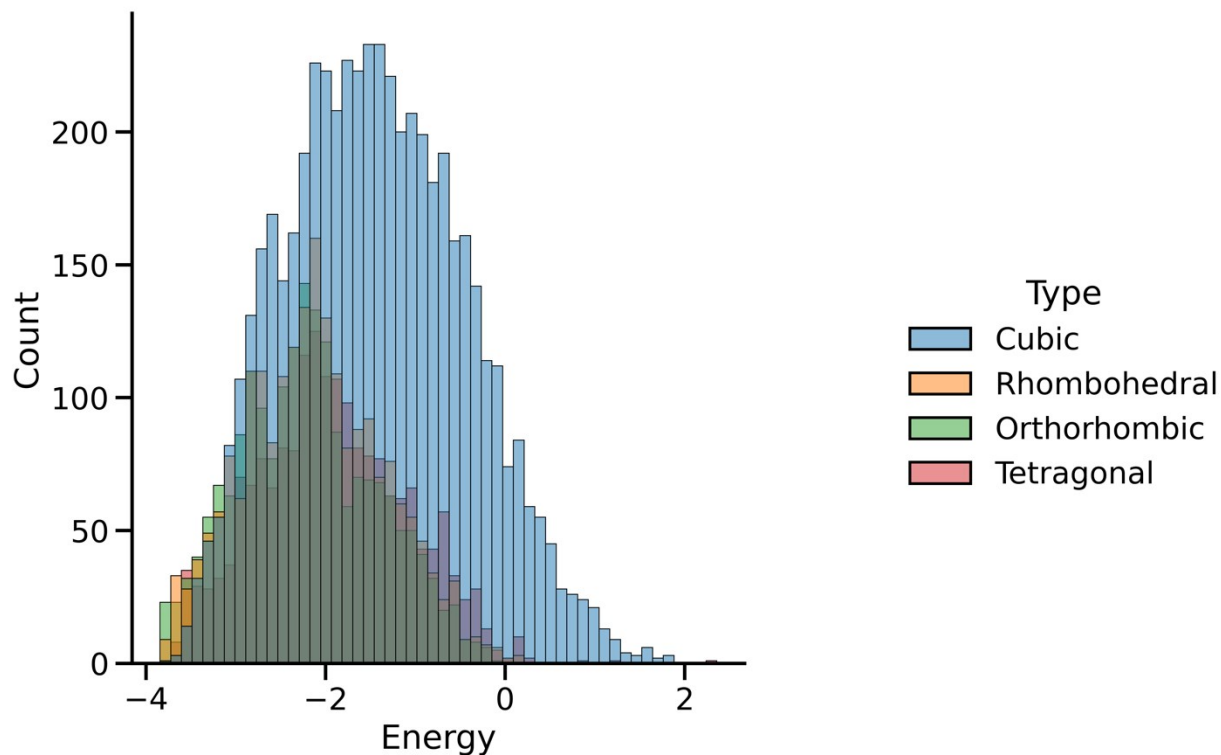

Figure S. 11. The distribution of formation energies amongst the perovskites in OQMD built from the cubic, rhombohedral, orthorhombic, and tetragonal perovskite prototype structures. Approximately half of the cubic perovskites in OQMD have the three non-cubic structures also calculated for their composition, with this split being primarily in favor of the lowest energy cubic perovskites.



## Compositions included in the cubic and non-cubic dataset

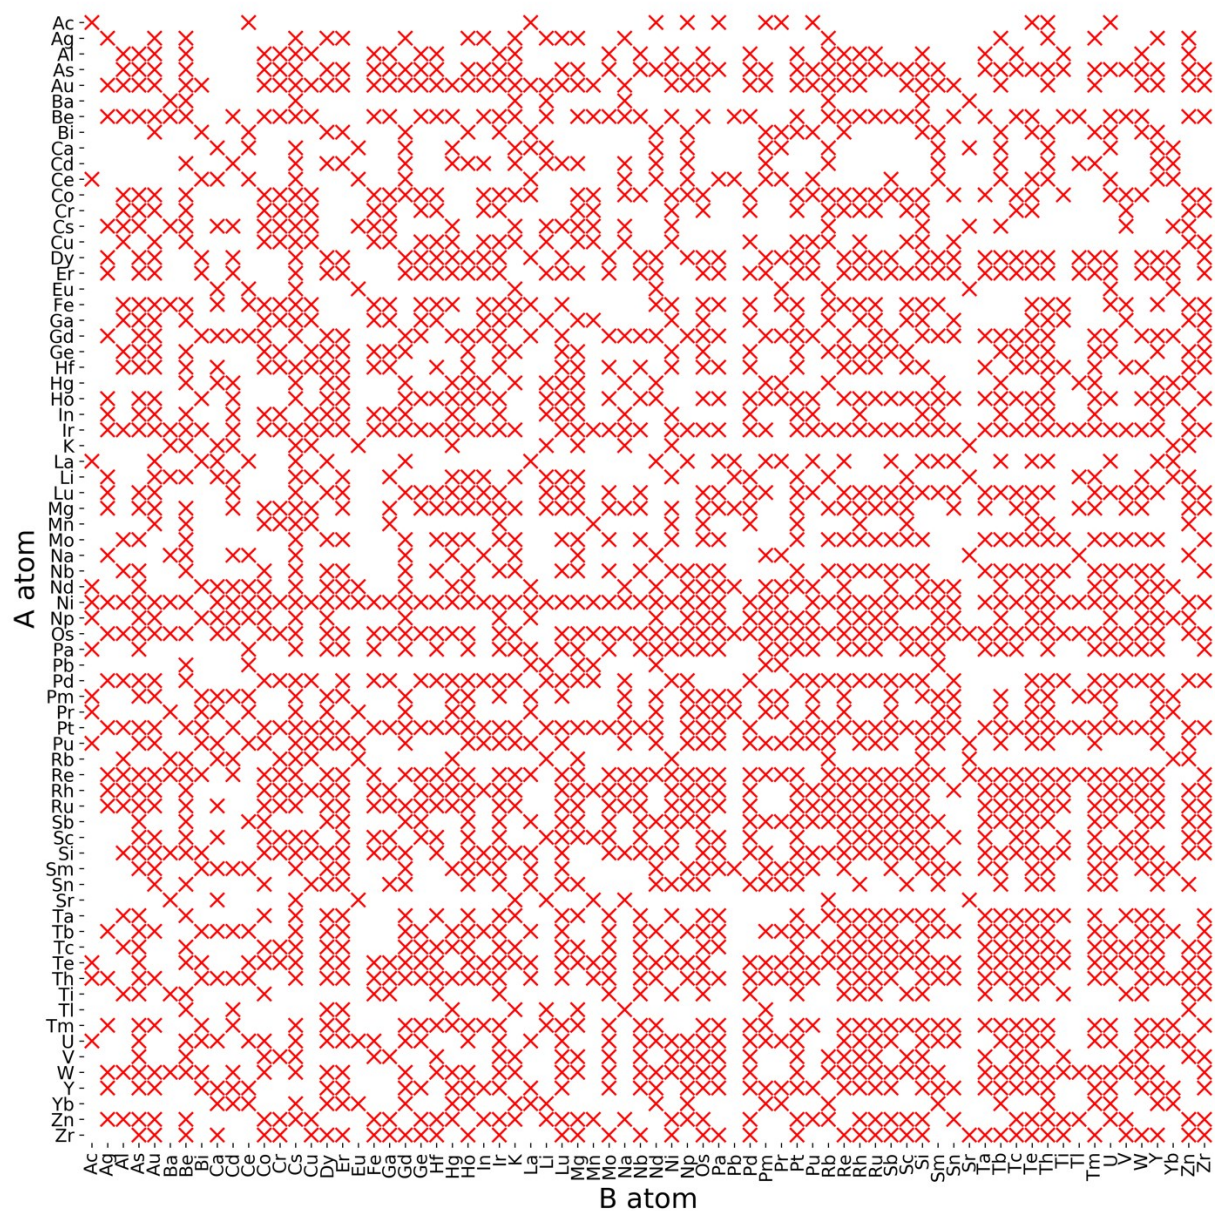

Figure S. 12. The compositions included in the cubic perovskites and non-cubic variants study. X's mark compositions not included in the current dataset. Many cubic compounds with higher formation energies were not included in the list of non-cubic perovskites to calculate by the OQMD<sup>A</sup> project.

## Tables of outliers for the cubic and non-cubic dataset

Table S 6. Outliers of magnitude greater than 0.5 eV/atom from the boosted CNN using atomic Hirshfeld surface fingerprint plots on the cubic and non-cubic perovskites dataset. 12 of the 23 outliers contain either K, Rb, or Ba, similar to the outliers from the cubic only dataset. All but two of the major outliers exist for either a cubic or a rhombohedral phase.

| OQMD ID | Formation Energy [eV/atom] | Formula | Structure Type         | Test or Train | Boosted CNN Prediction | Boosted CNN Residual |
|---------|----------------------------|---------|------------------------|---------------|------------------------|----------------------|
| 680527  | -0.53978                   | NaOsO3  | TetraPerovskite_PbTiO3 | train         | 0.59397                | 1.13375              |
| 351071  | 0.30148                    | RbNaO3  | CubicPerovskite_SrFeO3 | train         | 0.89237                | 0.59089              |
| 827283  | -0.19652                   | UVO3    | RhombPerovskite_NdAlO3 | train         | 0.58261                | 0.77913              |
| 352670  | -0.13769                   | AcOsO3  | CubicPerovskite_SrFeO3 | test          | -0.92652               | -0.78883             |
| 352220  | 0.01141                    | AgPdO3  | CubicPerovskite_SrFeO3 | test          | -0.49717               | -0.50858             |
| 825448  | -2.28222                   | BaEuO3  | RhombPerovskite_NdAlO3 | test          | -2.81651               | -0.53428             |
| 353778  | 0.21877                    | BaMoO3  | CubicPerovskite_SrFeO3 | test          | -0.33410               | -0.55287             |
| 352432  | 0.31813                    | BaTaO3  | CubicPerovskite_SrFeO3 | test          | -0.29747               | -0.61560             |
| 354832  | 0.45994                    | BiOsO3  | CubicPerovskite_SrFeO3 | test          | -0.54963               | -1.00957             |
| 354078  | -1.90141                   | GdRhO3  | CubicPerovskite_SrFeO3 | test          | -1.27810               | 0.62331              |
| 353567  | 0.16618                    | K2O3    | CubicPerovskite_SrFeO3 | test          | 3.03919                | 2.87301              |
| 682719  | -0.84201                   | K2O3    | OrthoPerovskite_GdFeO3 | test          | 0.13856                | 0.98057              |
| 826181  | 0.06963                    | K2O3    | RhombPerovskite_NdAlO3 | test          | 1.99372                | 1.92408              |
| 353595  | 0.15070                    | KRbO3   | CubicPerovskite_SrFeO3 | test          | 1.86324                | 1.71254              |
| 354728  | 0.13718                    | KRbO3   | CubicPerovskite_SrFeO3 | test          | 1.69408                | 1.55690              |
| 826197  | 0.11809                    | KRbO3   | RhombPerovskite_NdAlO3 | test          | 0.98956                | 0.87146              |
| 681206  | 0.17827                    | KRbO3   | TetraPerovskite_PbTiO3 | test          | 0.83954                | 0.66128              |
| 826809  | 0.08369                    | KRbO3   | RhombPerovskite_NdAlO3 | test          | 0.59725                | 0.51355              |
| 352055  | -1.32336                   | LiNbO3  | CubicPerovskite_SrFeO3 | test          | -0.69393               | 0.62943              |
| 827216  | -2.18036                   | PuTiO3  | RhombPerovskite_NdAlO3 | test          | -1.64255               | 0.53780              |
| 352939  | 0.46616                    | TaHgO3  | CubicPerovskite_SrFeO3 | test          | -0.35485               | -0.82101             |
| 825737  | -2.72396                   | TbCrO3  | RhombPerovskite_NdAlO3 | test          | -2.10865               | 0.61532              |
| 351910  | -2.28914                   | ZrBiO3  | CubicPerovskite_SrFeO3 | test          | -1.53902               | 0.75011              |

Table S 7. Outliers of magnitude greater than 0.5 eV/atom from the CGCNN<sup>3</sup> model on the cubic and non-cubic perovskites dataset. Row 6 and 7 elements are in 29 of the 40 outliers. Half of the 40 outliers are for tetragonal structures, and only 2 were orthogonal structures.

| OQMD ID | Formation Energy [eV/atom] | Formula | Structure Type         | Test or Train | CGCNN Prediction | CGCNN Residual |
|---------|----------------------------|---------|------------------------|---------------|------------------|----------------|
| 680866  | -0.75628                   | AllnO3  | TetraPerovskite_PbTiO3 | train         | -1.47412         | -0.71783       |
| 681887  | -2.78652                   | BaLaO3  | OrthoPerovskite_GdFeO3 | train         | -2.28605         | 0.50047        |

|        |          |        |                        |       |          |          |
|--------|----------|--------|------------------------|-------|----------|----------|
| 826932 | -2.99716 | CaSiO3 | RhombPerovskite_NdAlO3 | train | -2.36958 | 0.62758  |
| 680403 | -1.74163 | CaSiO3 | TetraPerovskite_PbTiO3 | train | -2.37153 | -0.62990 |
| 680287 | 0.10016  | CdMoO3 | TetraPerovskite_PbTiO3 | train | -0.89109 | -0.99125 |
| 350688 | -2.52116 | ErNpO3 | CubicPerovskite_SrFeO3 | train | -3.05845 | -0.53730 |
| 825501 | -2.79764 | GdBeO3 | RhombPerovskite_NdAlO3 | train | -2.20389 | 0.59375  |
| 352272 | -1.55408 | KUO3   | CubicPerovskite_SrFeO3 | train | -3.23986 | -1.68578 |
| 826277 | -0.15661 | NaLiO3 | RhombPerovskite_NdAlO3 | train | -0.67279 | -0.51618 |
| 680803 | -1.75433 | NbCrO3 | TetraPerovskite_PbTiO3 | train | -2.42981 | -0.67548 |
| 353435 | -1.66989 | NiPtO3 | CubicPerovskite_SrFeO3 | train | -0.03333 | 1.63655  |
| 352361 | -0.83158 | PaTeO3 | CubicPerovskite_SrFeO3 | train | -1.34851 | -0.51693 |
| 681342 | -1.17059 | PuCrO3 | TetraPerovskite_PbTiO3 | train | -2.72533 | -1.55474 |
| 681194 | -1.95281 | PuNiO3 | TetraPerovskite_PbTiO3 | train | -2.62112 | -0.66831 |
| 351872 | -0.39435 | PuWO3  | CubicPerovskite_SrFeO3 | train | -1.17295 | -0.77860 |
| 826854 | -1.73944 | RbReO3 | RhombPerovskite_NdAlO3 | train | -1.21089 | 0.52854  |
| 680792 | -1.19144 | SrReO3 | TetraPerovskite_PbTiO3 | train | -1.71811 | -0.52667 |
| 680149 | -1.75642 | UCdO3  | TetraPerovskite_PbTiO3 | train | -2.31174 | -0.55532 |
| 352228 | -0.95121 | YbPaO3 | CubicPerovskite_SrFeO3 | train | -1.78830 | -0.83709 |
| 679797 | 0.21709  | AgMoO3 | TetraPerovskite_PbTiO3 | test  | -0.70000 | -0.91709 |
| 681168 | -1.40193 | AlAgO3 | TetraPerovskite_PbTiO3 | test  | -2.33149 | -0.92956 |
| 680426 | -0.72753 | AlBiO3 | TetraPerovskite_PbTiO3 | test  | -1.65915 | -0.93162 |
| 680292 | -0.73329 | BaReO3 | TetraPerovskite_PbTiO3 | test  | -1.41438 | -0.68109 |
| 680890 | -1.13465 | CaBeO3 | TetraPerovskite_PbTiO3 | test  | -2.04233 | -0.90768 |
| 680989 | 0.13304  | CsGeO3 | TetraPerovskite_PbTiO3 | test  | -0.46104 | -0.59408 |
| 826933 | -3.08026 | EuSiO3 | RhombPerovskite_NdAlO3 | test  | -2.27173 | 0.80854  |
| 352466 | -2.54720 | HoNpO3 | CubicPerovskite_SrFeO3 | test  | -3.07189 | -0.52469 |
| 826809 | 0.08369  | KRbO3  | RhombPerovskite_NdAlO3 | test  | -0.47780 | -0.56149 |
| 350253 | -2.28401 | LiUO3  | CubicPerovskite_SrFeO3 | test  | -2.84502 | -0.56100 |
| 680108 | -1.18248 | LiUO3  | TetraPerovskite_PbTiO3 | test  | -3.81640 | -2.63392 |
| 680732 | -0.96928 | NdNiO3 | TetraPerovskite_PbTiO3 | test  | -1.72204 | -0.75276 |
| 350865 | -1.29518 | PuPbO3 | CubicPerovskite_SrFeO3 | test  | -2.09440 | -0.79922 |
| 352717 | -0.98233 | PuTcO3 | CubicPerovskite_SrFeO3 | test  | -1.49274 | -0.51042 |
| 680048 | -0.56025 | RbMoO3 | TetraPerovskite_PbTiO3 | test  | -1.09075 | -0.53050 |
| 680736 | -0.52846 | RbWO3  | TetraPerovskite_PbTiO3 | test  | -1.11886 | -0.59040 |
| 680363 | -0.70944 | TiHgO3 | TetraPerovskite_PbTiO3 | test  | -1.45476 | -0.74532 |
| 825404 | -2.90772 | UAlO3  | RhombPerovskite_NdAlO3 | test  | -3.52657 | -0.61885 |
| 682925 | -2.93972 | UAlO3  | OrthoPerovskite_GdFeO3 | test  | -3.49668 | -0.55696 |
| 681228 | -1.47288 | YbBeO3 | TetraPerovskite_PbTiO3 | test  | -1.97868 | -0.50580 |
| 826935 | -3.09632 | YbSiO3 | RhombPerovskite_NdAlO3 | test  | -2.13958 | 0.95673  |

## Confusion plots for the cubic and non-cubic dataset neural network results

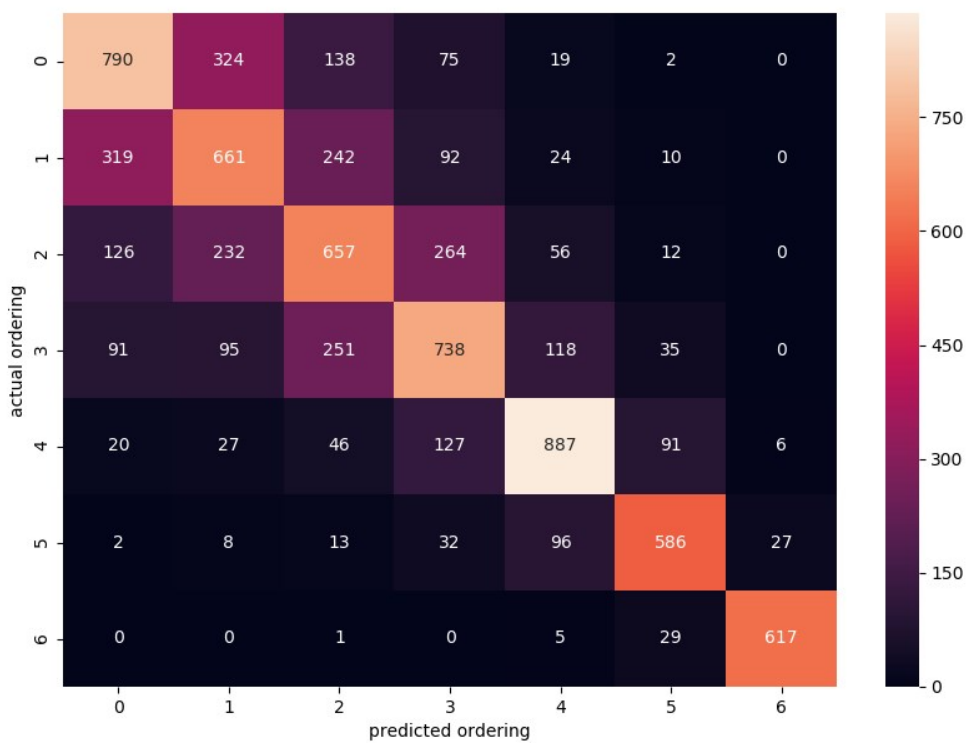

Figure S. 13. Confusion plot for the relative ordering of same composition phases in the full cubic and non-cubic perovskite dataset as produced by our model built using a CNN and Hirshfeld surface fingerprint plots.

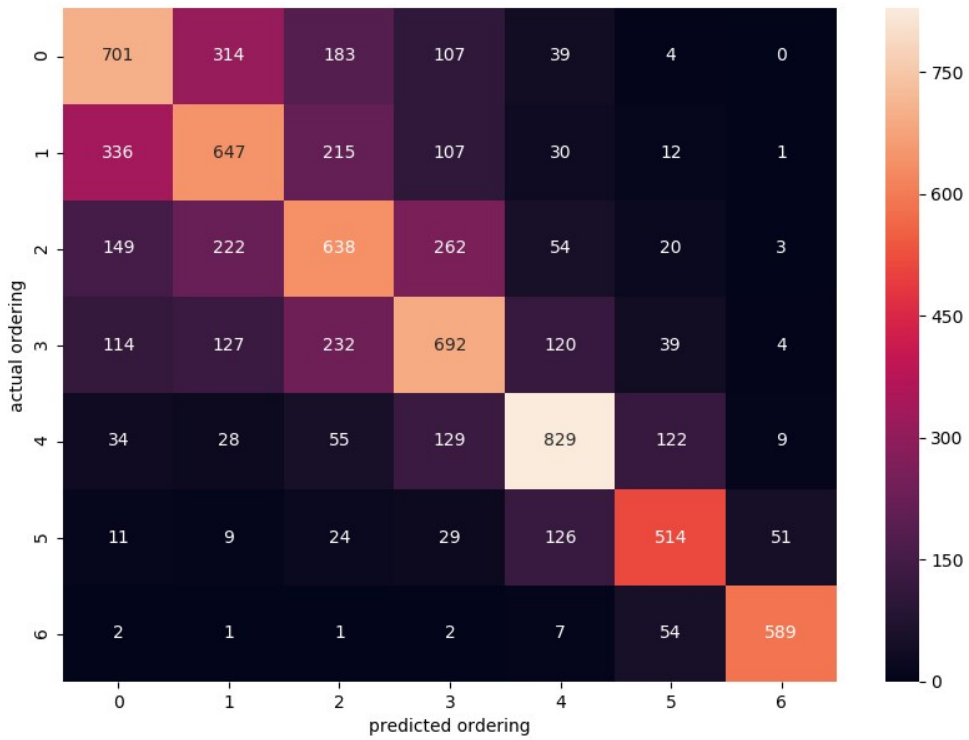

Figure S. 14. Confusion plot for the relative ordering of same composition phases in the full cubic and non-cubic perovskite dataset as produced by the CGCNN<sup>3</sup> model.

### Neural Network qualitative visualization

The following figure (Figure S. 15) is included to qualitatively highlight the nonlinearity of the relationship between the features in the input to the neural network (the atomic Hirshfeld surfaces fingerprint plot) and the formation energy of the crystal structure. Each plot shows a visualization of the latent space for the entire dataset at different points through the neural network. The latent space refers to the output of the intermediate layers in a deep neural network that contains the geometric features as captured by the network through progressive layers of abstraction. Here we have performed a t-SNE<sup>5</sup> on the output of the intermediate convolution and fully connected layers to generate a compressed visualization of the geometric features hidden in the fingerprint plots in Figure S. 15. The output of the convolution layers are usually complex sets of multidimensional matrices that are flattened to give a vector before feeding it as an input to the t-SNE framework. The outputs of the dense layers are fed as is. The t-SNE is a manifold learning algorithm that computes the structural similarities of data in high-dimension and produces a lower order representation while preserving the topology of the original data. The latent space visualization gives a global and at times hierarchical structure of the overall dataset as it moves along the forward direction of a deep network. Although the absolute coordinates do not bear any significance, the proximity between the compounds in 2D is a representation of how they would have been in the high-dimensional space. For example, the t-SNE reduces each 50x50 input fingerprint plot to a 2D representation in Figure S. 15 (upper left) by approximately mimicking the similarities between the fingerprint plots for all the compounds. Thus, the compounds with similar looking fingerprint plots sit closer to each other, yet they show only minimal correlation with the formation energy. As the dataset is processed by the neural network, the proximities of the network's internal representations of the compounds change significantly and the global structure evolves into a clear trend in formation energy with respect to the latent space. This plot visualizes the level of nonlinear complexity that the network learns from the beginning till the end. Figure S. 15 (lower right) displays a smooth gradation of compound coloring in terms of the formation energy, showing that the network is able to find out combinations of geometric motifs inside the fingerprint plots that are in near perfect correlation with the output.

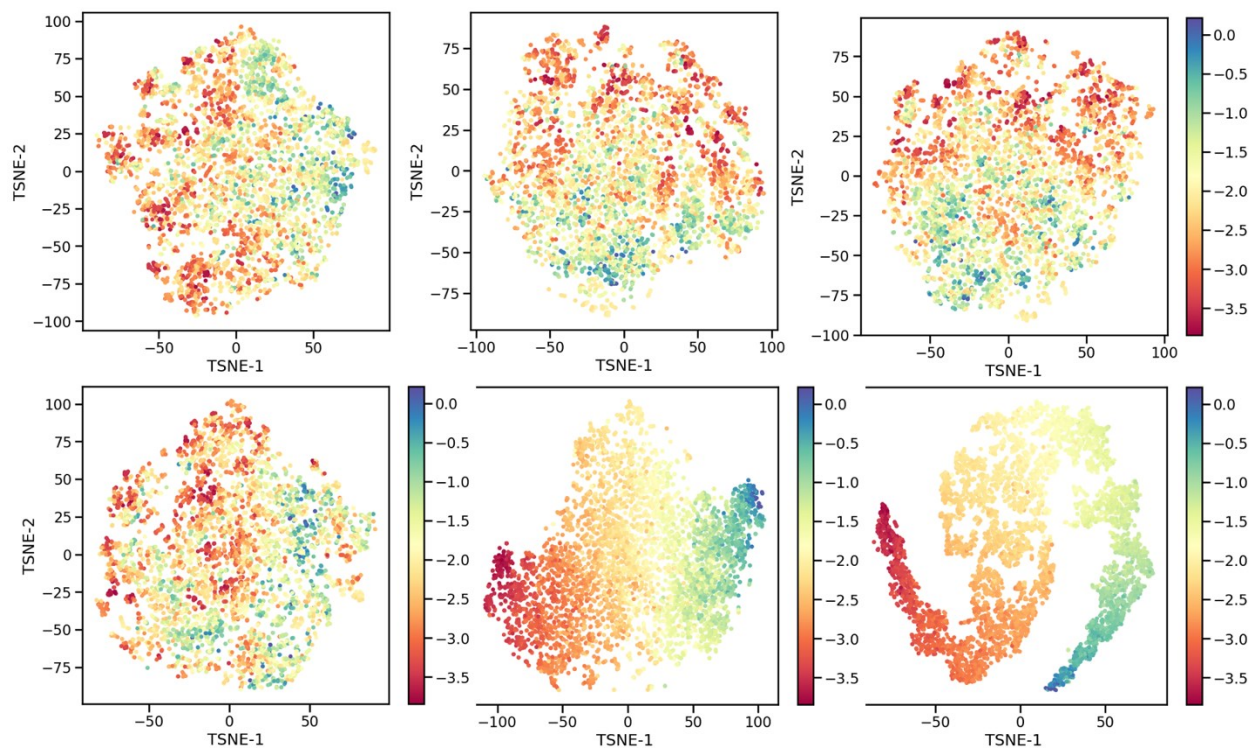

Figure S. 15. Latent Space Visualization using t-SNE for the (upper left) input layer, (upper middle) first convolution layer, (upper right) 5<sup>th</sup> convolution layer, (lower left), 9<sup>th</sup> convolution layer, (lower middle) first dense layer, and (lower right) final dense layer. The t-SNE methodology shows the higher-dimensional similarity relationships between the input (upper left) or mid-network layer output (the rest) for all the compounds in the dataset flattened into two dimensions. The relationship is shown to be highly nonlinear with regards to the input, but the final network layer's latent space is easily correlated to the formation energy.

### Statistical plots for the cubic and non-cubic dataset based on structure analysis

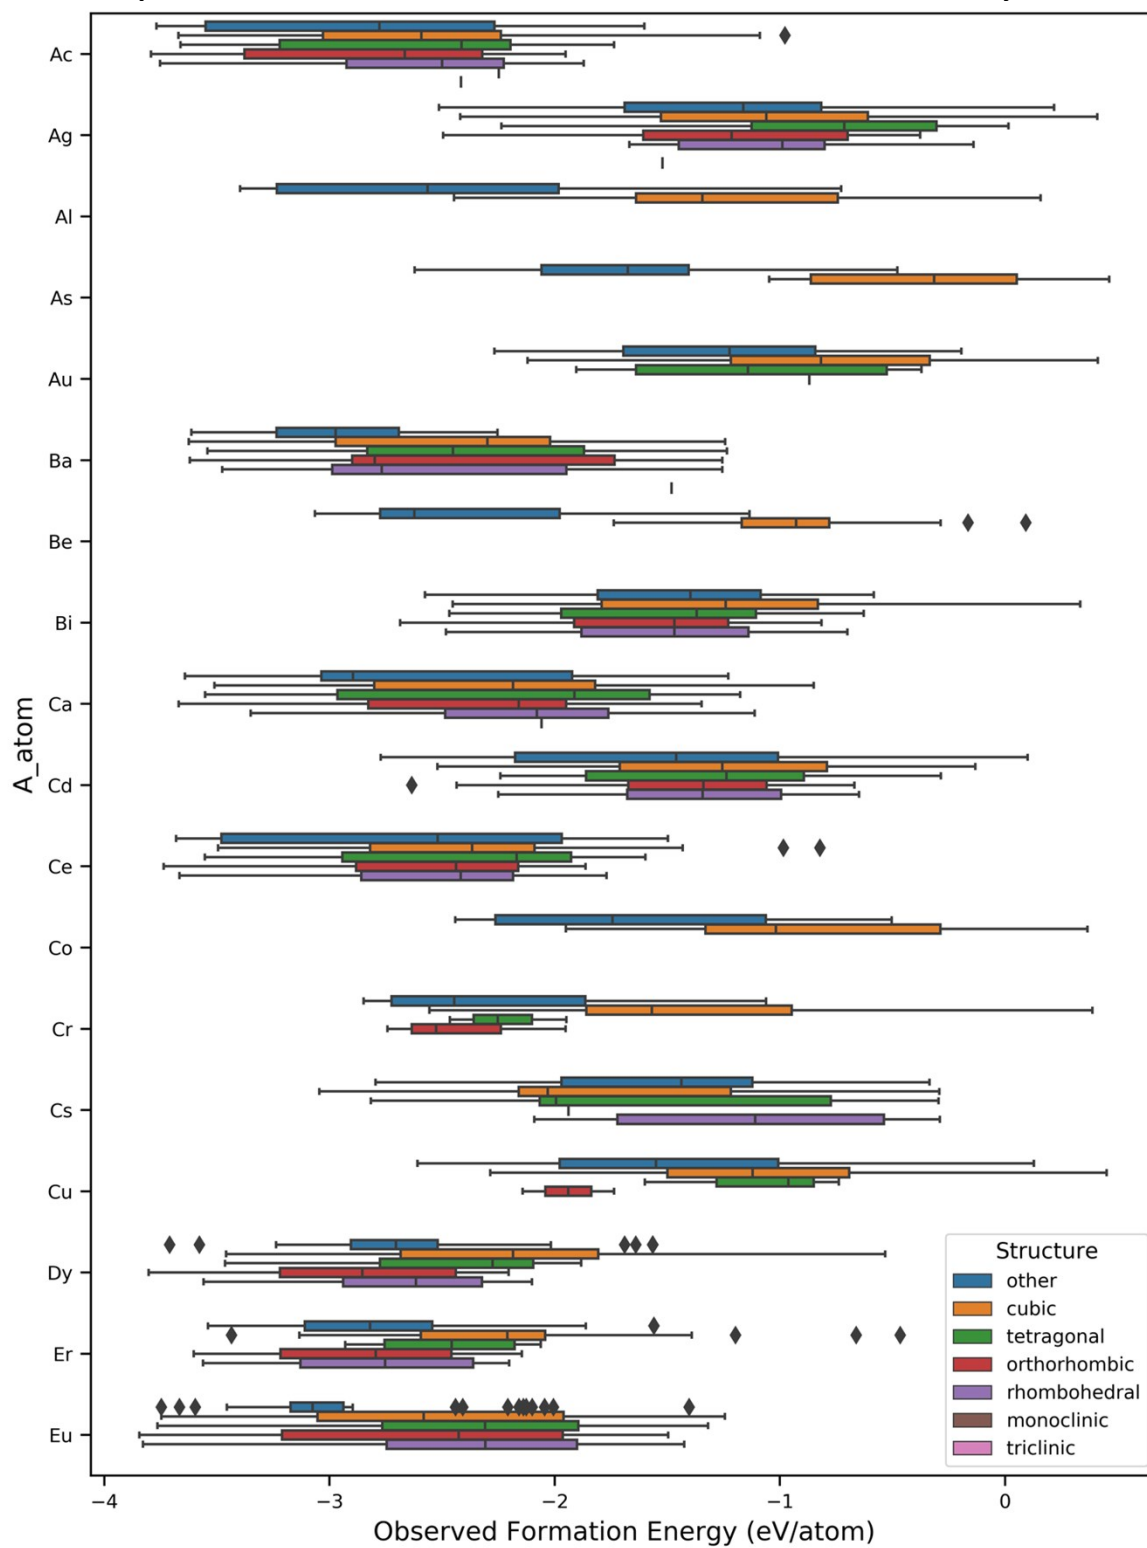

Figure S. 16. Ranges of DFT predicted formation energies vs. the atom placed in the A position of the initial structure for the cubic and non-cubic perovskites dataset from OQMD. The energies are categorized by their lattice symmetry if their final structure has perovskite-like coordination (8,10, or 12 for A site and 6 for B site), or “other” if the structure has different coordination. This plot contains elements in the A-E range.



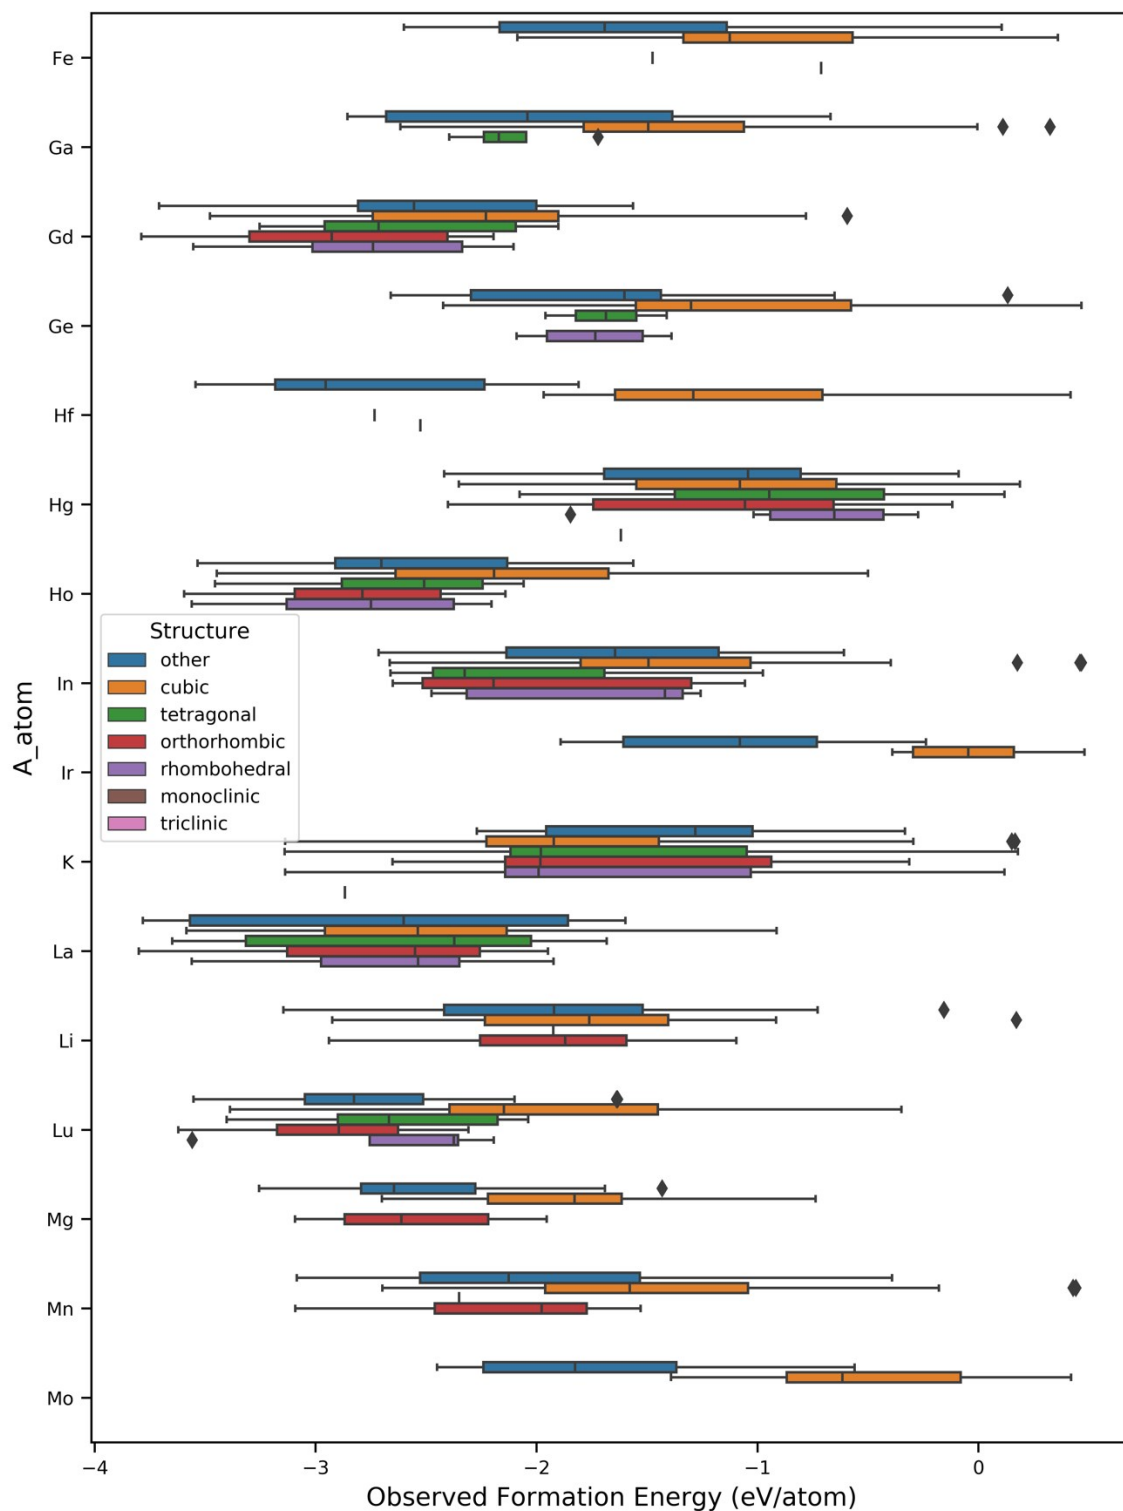

Figure S. 17. Ranges of DFT predicted formation energies vs. the atom placed in the A position of the initial structure for the cubic and non-cubic perovskites dataset from OQMD. The energies are categorized by their lattice symmetry if their final structure has perovskite-like coordination (8,10, or 12 for A site and 6 for B site), or “other” if the structure has different coordination. This plot contains elements in the A-H range. This plot contains elements in the F-M range.

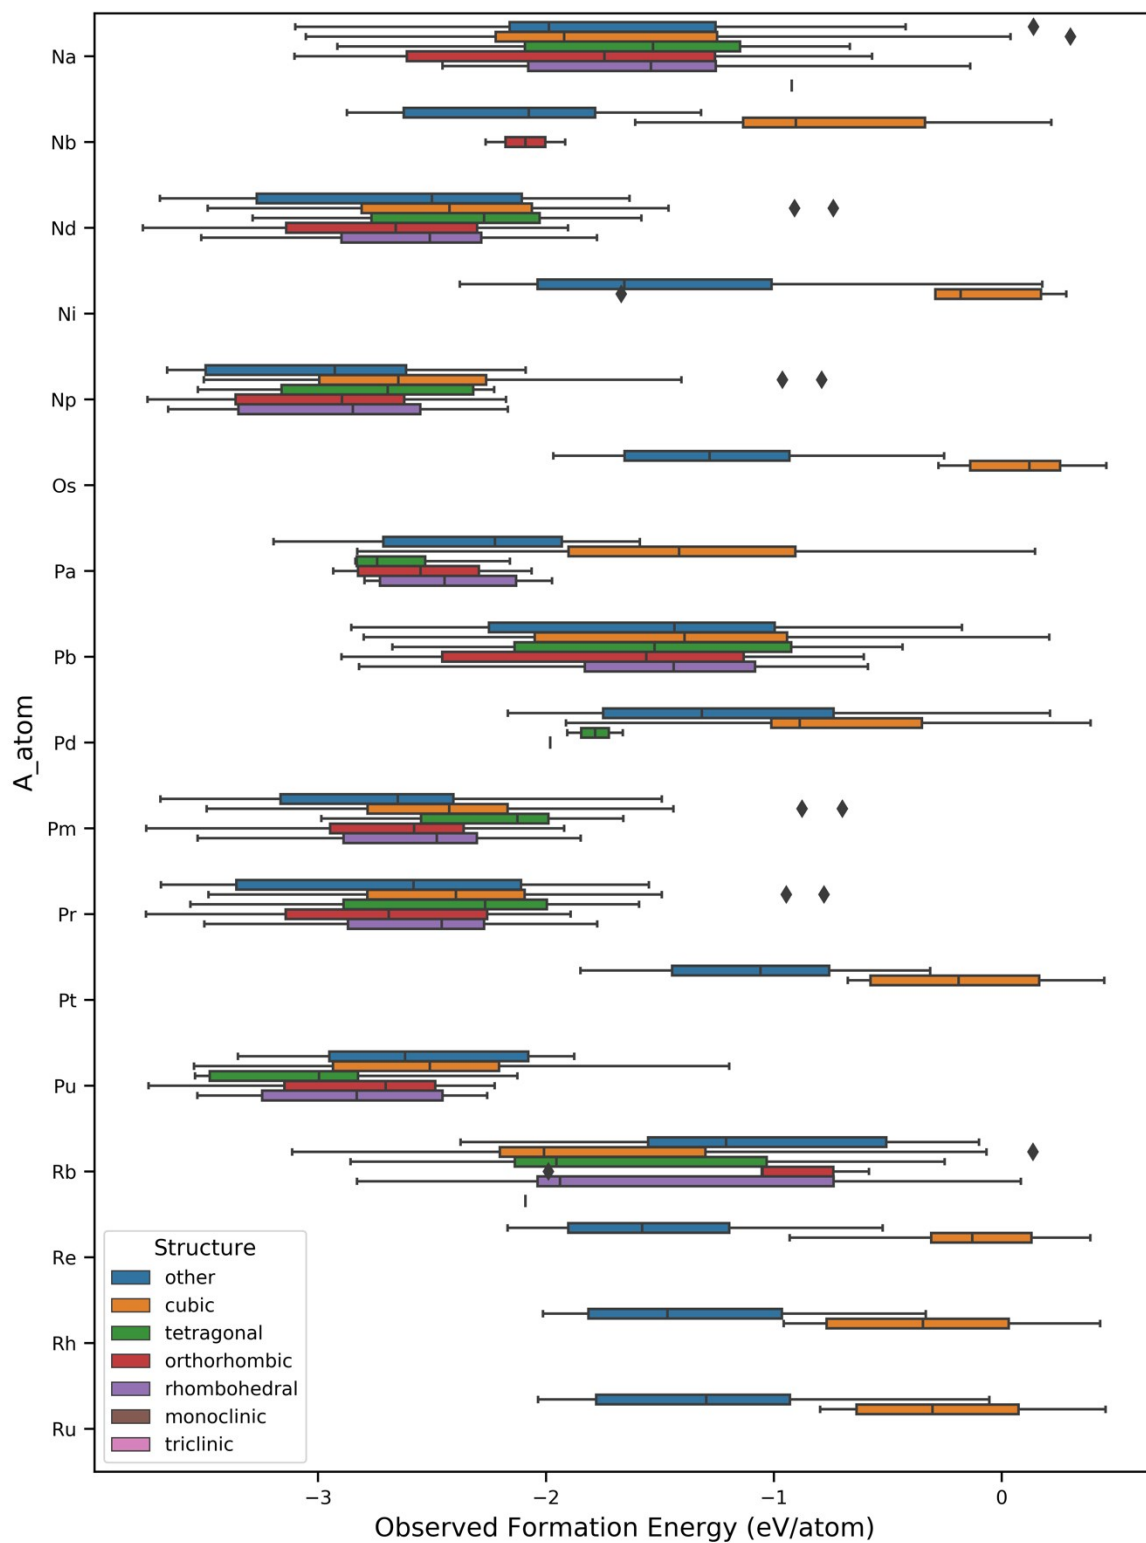

Figure S. 18. Ranges of DFT predicted formation energies vs. the atom placed in the A position of the initial structure for the cubic and non-cubic perovskites dataset from OQMD. The energies are categorized by their lattice symmetry if their final structure has perovskite-like coordination (8,10, or 12 for A site and 6 for B site), or “other” if the structure has different coordination. This plot contains elements in the N-R range.

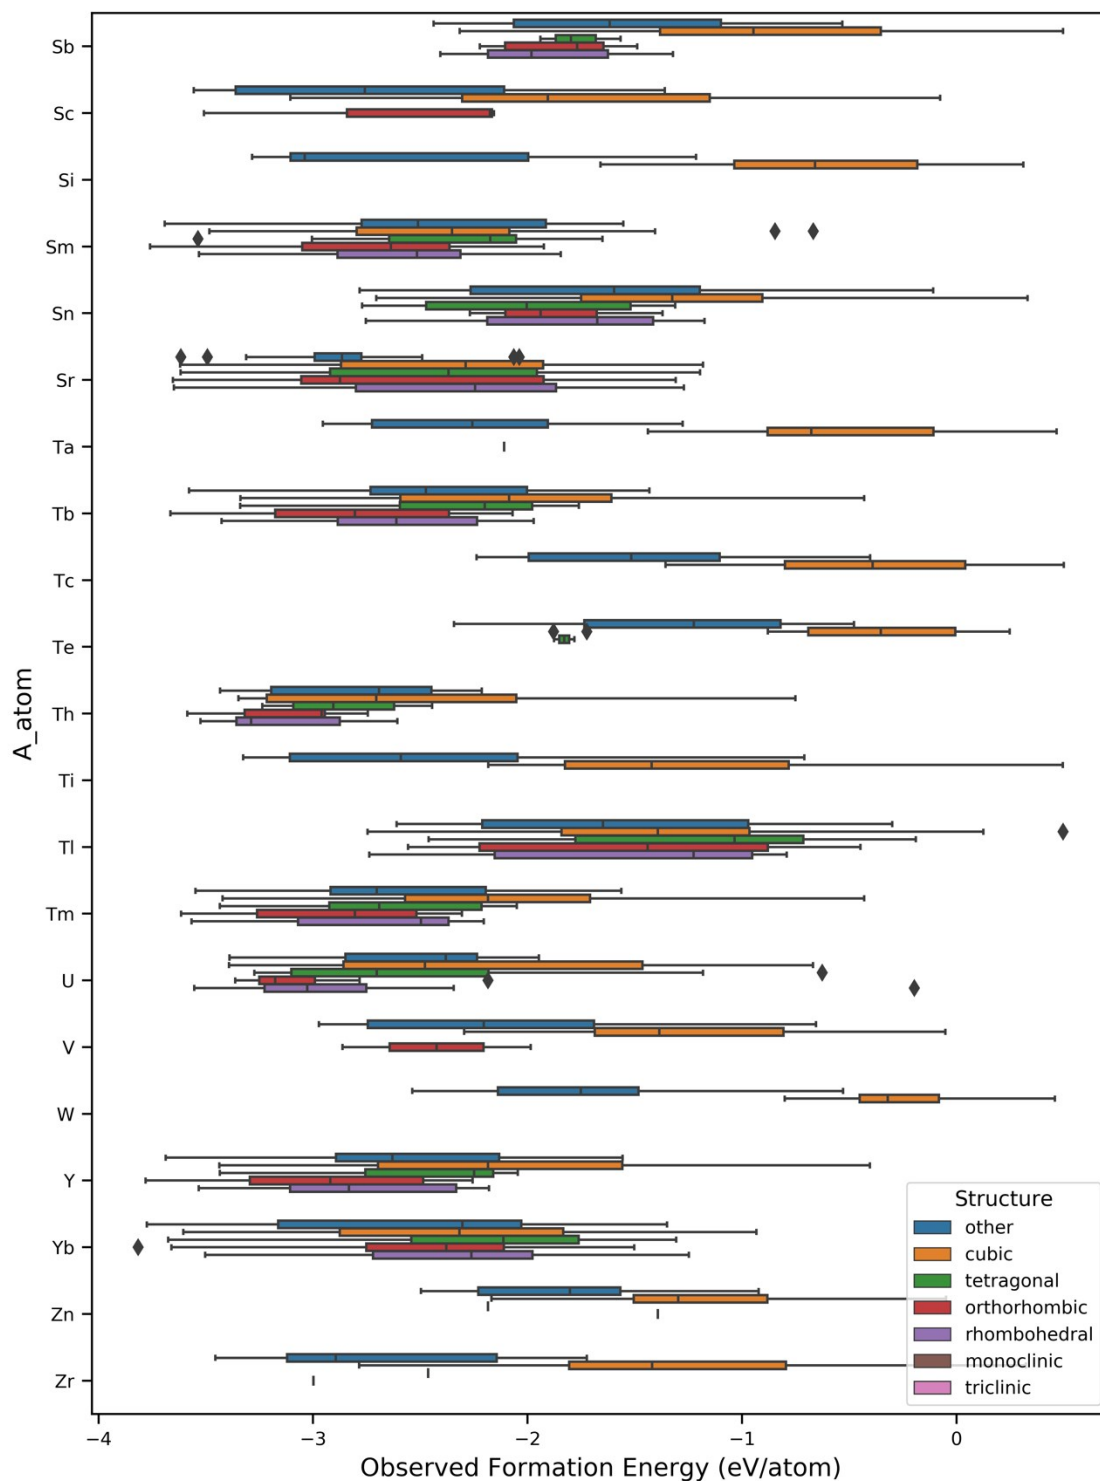

Figure S. 19. Ranges of DFT predicted formation energies vs. the atom placed in the A position of the initial structure for the cubic and non-cubic perovskites dataset from OQMD. The energies are categorized by their lattice symmetry if their final structure has perovskite-like coordination (8,10, or 12 for A site and 6 for B site), or “other” if the structure has different coordination. This plot contains elements in the S-Z range.

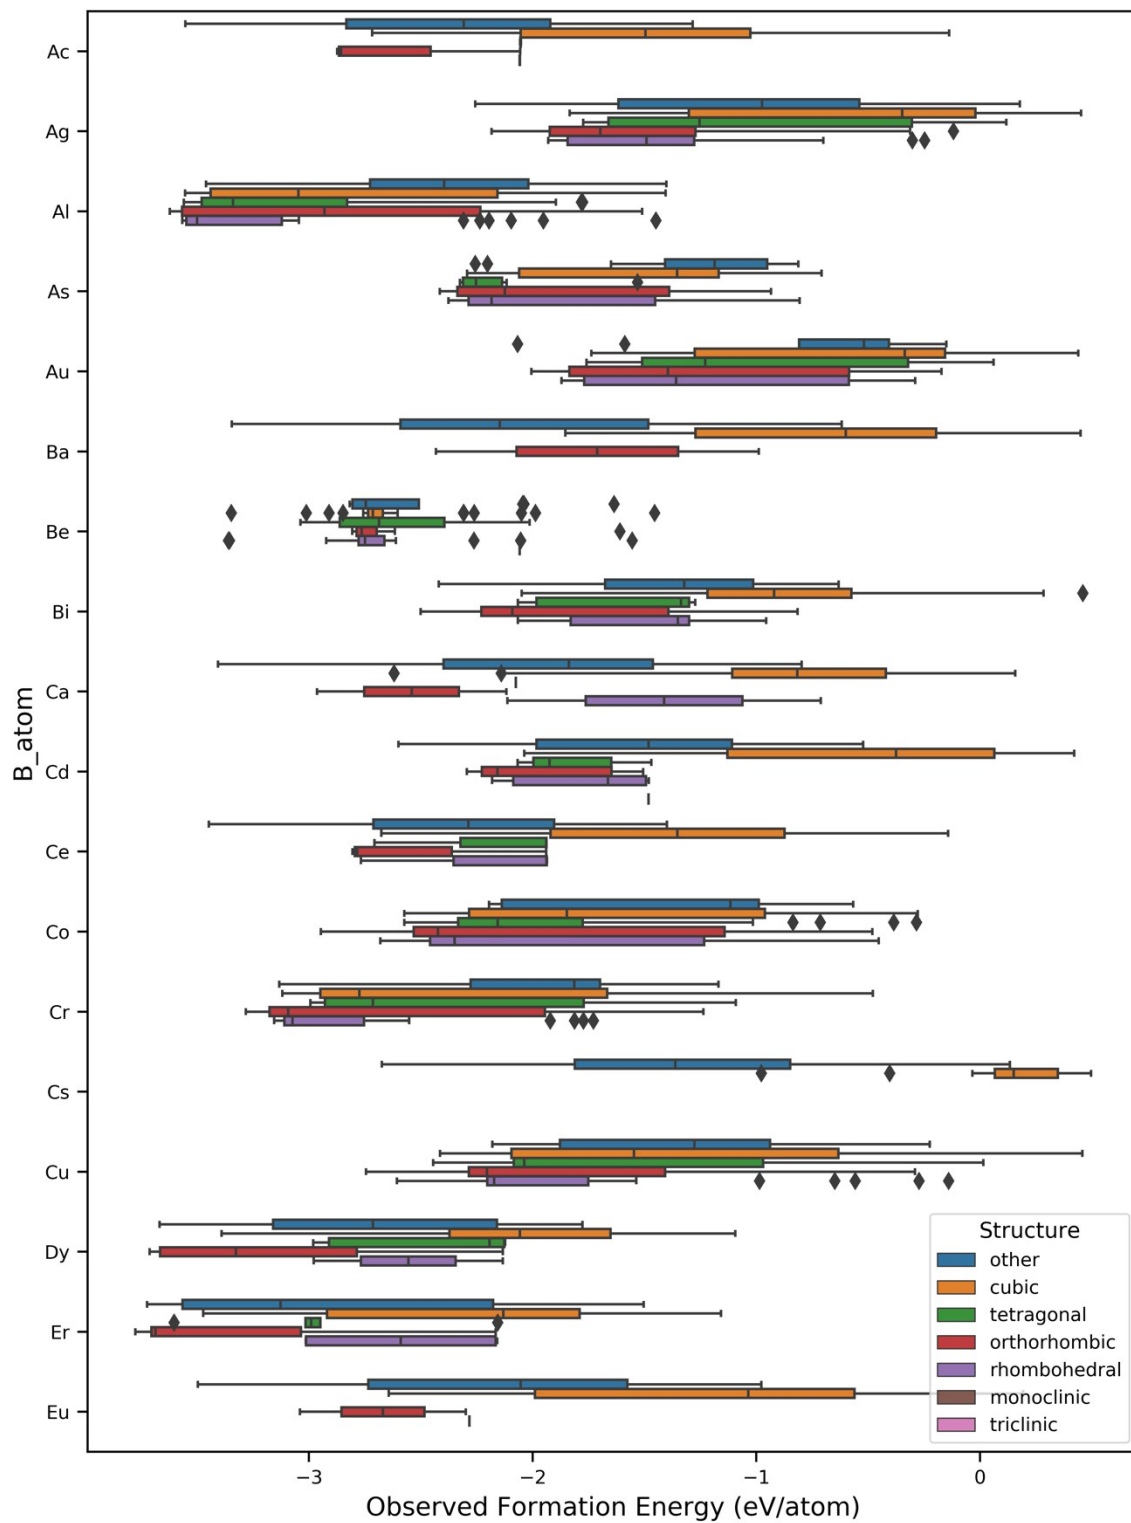

Figure S. 20. Ranges of DFT predicted formation energies vs. the atom placed in the B position of the initial structure for the cubic and non-cubic perovskites dataset from OQMD. The energies are categorized by their lattice symmetry if their final structure has perovskite-like coordination (8,10, or 12 for A site and 6 for B site), or “other” if the structure has different coordination. This plot contains elements in the A-E range.

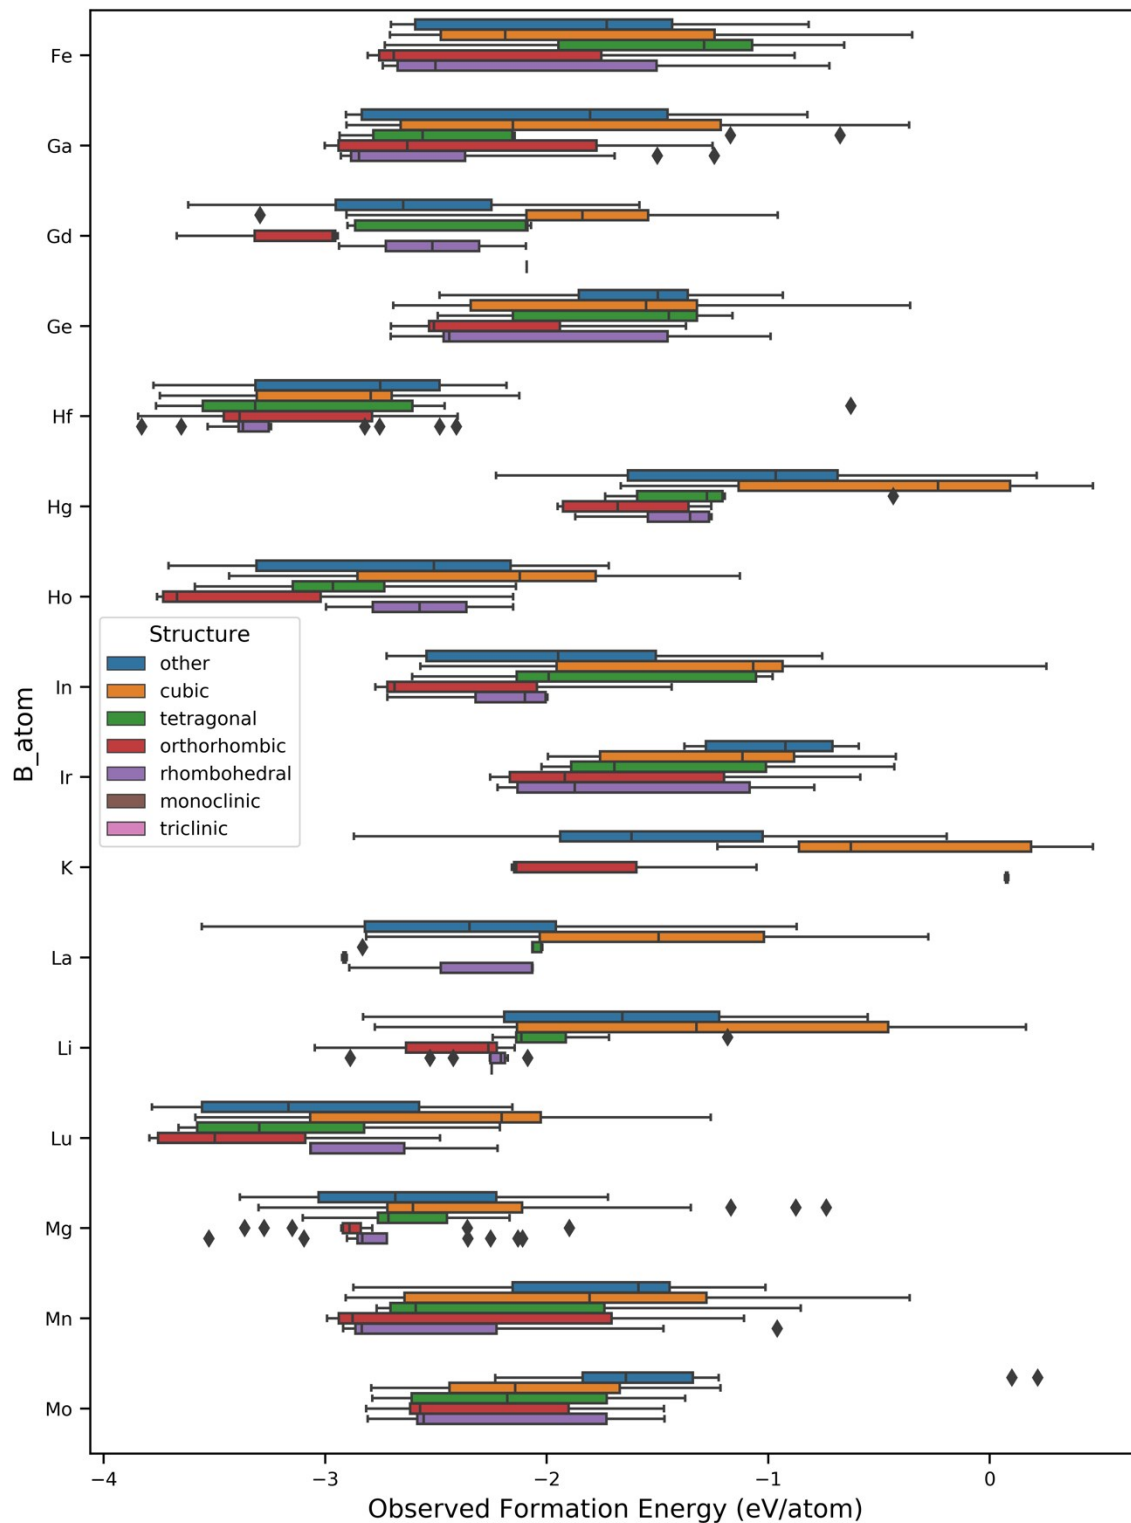

Figure S. 21. Ranges of DFT predicted formation energies vs. the atom placed in the B position of the initial structure for the cubic and non-cubic perovskites dataset from OQMD. The energies are categorized by their lattice symmetry if their final structure has perovskite-like coordination (8,10, or 12 for A site and 6 for B site), or "other" if the structure has different coordination. This plot contains elements in the F-M range.

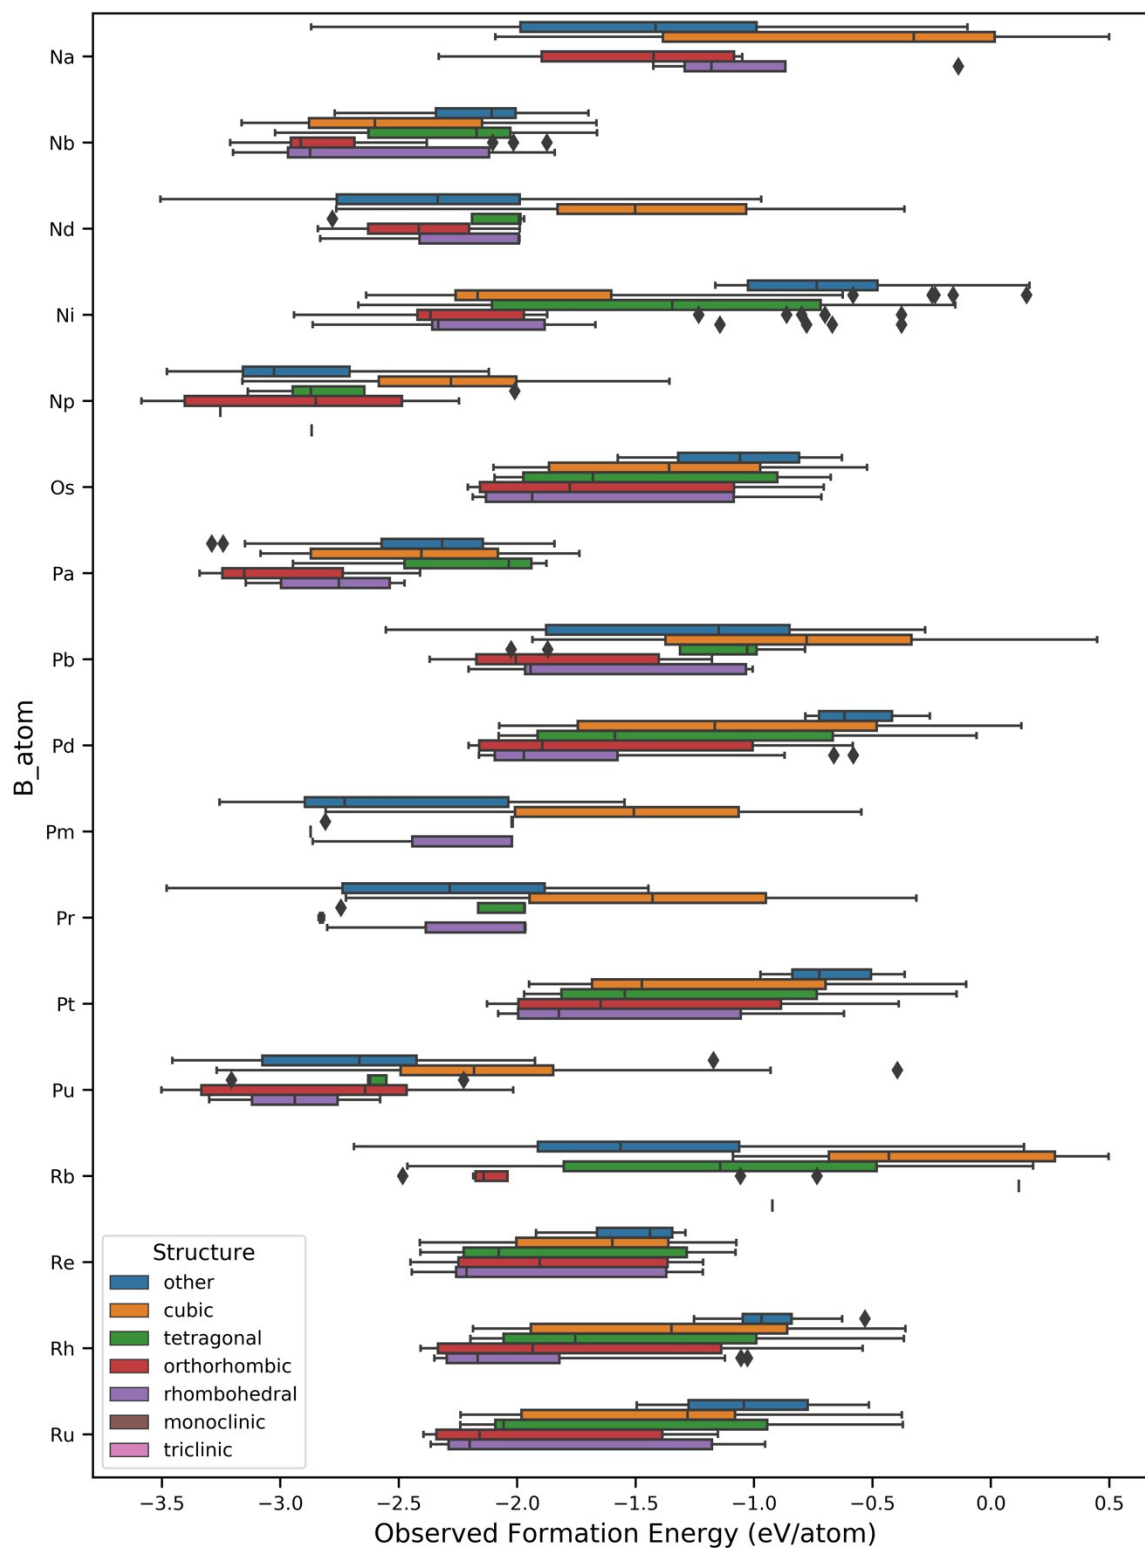

Figure S. 22. Ranges of DFT predicted formation energies vs. the atom placed in the B position of the initial structure for the cubic and non-cubic perovskites dataset from OQMD. The energies are categorized by their lattice symmetry if their final structure has perovskite-like coordination (8,10, or 12 for A site and 6 for B site), or “other” if the structure has different coordination. This plot contains elements in the N-R range.

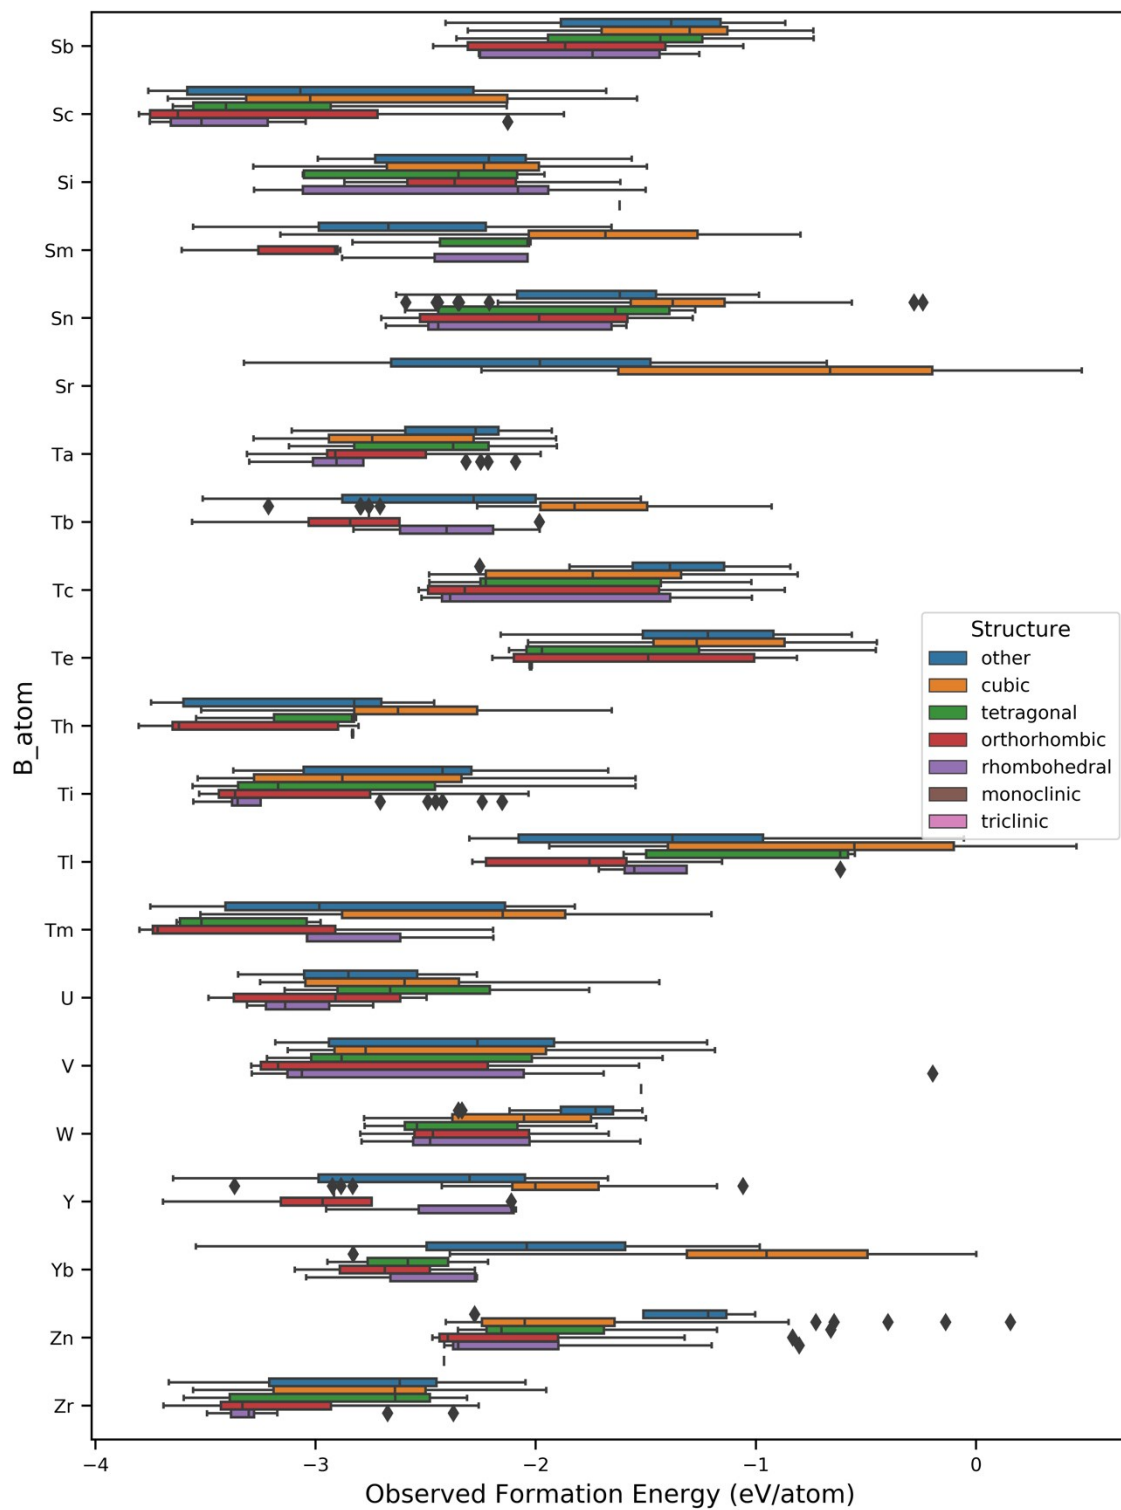

Figure S. 23. Ranges of DFT predicted formation energies vs. the atom placed in the B position of the initial structure for the cubic and non-cubic perovskites dataset from OQMD. The energies are categorized by their lattice symmetry if their final structure has perovskite-like coordination (8,10, or 12 for A site and 6 for B site), or “other” if the structure has different coordination. This plot contains elements in the S-Z range.

### Reproducibility of the cubic and noncubic dataset results

To test the robustness of the results for the cubic and noncubic dataset, 20 different test/train splits were generated following the same rules of keeping all structural polymorphs of the same chemical composition in the same side of the split. Of the 20 new networks, 5 displayed significant overfitting, creating an average test set  $r^2$  of  $0.959 \pm 0.053$  (standard deviation) and an average training set  $r^2$  of  $0.989 \pm 0.002$ . In the 15 networks that did not display overfitting, the average test set  $r^2$  was  $0.987 \pm 0.003$  and the average training set  $r^2$  was  $0.989 \pm 0.002$ . These results are actually better than those reported in the main paper, indicating that our original network was somewhat overfit and even higher performance is fairly reliably able to be obtained from these networks.

### References

- (1) Abadi, M.; Agarwal, A.; Barham, P.; Brevdo, E.; Chen, Z.; Citro, C.; Corrado, G. S.; Davis, A.; Dean, J.; Devin, M. Tensorflow: Large-Scale Machine Learning on Heterogeneous Distributed Systems. *arXiv Prepr. arXiv1603.04467* **2016**.
- (2) Williams, L.; Mukherjee, A.; Rajan, K. Deep Learning Based Prediction of Perovskite Lattice Parameters from Hirshfeld Surface Fingerprints. *J. Phys. Chem. Lett.* **2020**, *11* (17), 7462–7468.
- (3) Xie, T.; Grossman, J. C. Crystal Graph Convolutional Neural Networks for an Accurate and Interpretable Prediction of Material Properties. *Phys. Rev. Lett.* **2018**, *120* (14), 145301.
- (4) Saal, J. E.; Kirklin, S.; Aykol, M.; Meredig, B.; Wolverton, C. Materials Design and Discovery with High-Throughput Density Functional Theory: The Open Quantum Materials Database (OQMD). *JOM* **2013**, *65* (11), 1501–1509.
- (5) Van der Maaten, L.; Hinton, G. Visualizing Data Using T-SNE. *J. Mach. Learn. Res.* **2008**, *9* (11).
